# Supplementary material for: Genome-wide identification of genes regulated in trans by transposable element small interfering RNAs
Source: PubMed Central journal article supplement — RNA Biol. 2013 Jul 2;10(8):1379–95. doi: 10.4161/rna.25555 (PMC3817159; doi:10.4161/rna.25555), 2013-07-02
Supplement: rna-10-1379-s01.pdf [file rna-10-1379-s01.pdf]

## **Supplemental Material to:**

**Andrea D. McCue, Saivageethi Nuthikattu, R. Keith Slotkin**

**Genome-wide Identification of genes regulated in trans  
by transposable element small interfering RNAs**

**2012; 10(8)**

**<http://dx.doi.org/10.4161/rna.25555>**

**[www.landesbioscience.com/journals/rnabiology/article/25555/](http://www.landesbioscience.com/journals/rnabiology/article/25555/)**

## Supplemental Figure 1

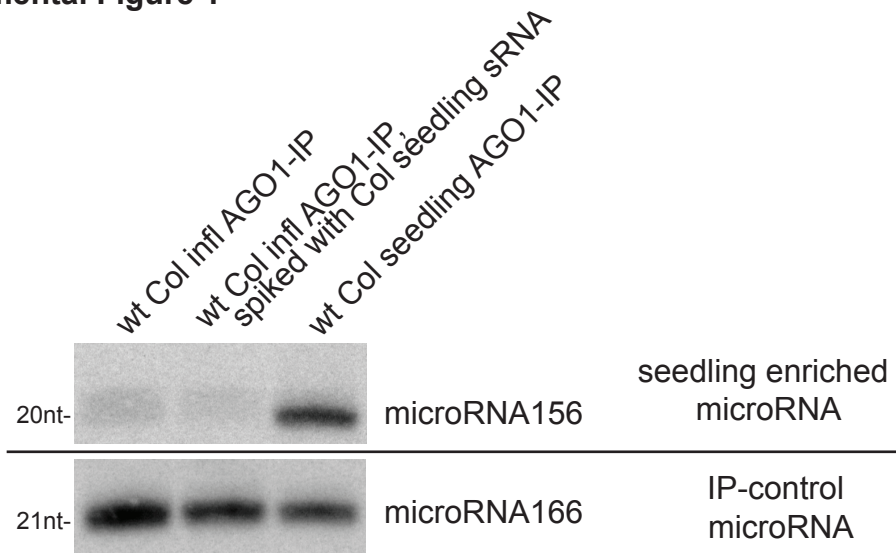

### Supplemental Figure 1. Small RNAs do not incorporate in AGO1 protein complexes after cell lysis

We performed AGO1-IPs from wild-type Columbia (wt Col) seedling and inflorescence (infl) tissues, and confirmed that the 20 nt microRNA156 is a seedling-enriched microRNA that accumulates at very low levels in infl tissue (Meng et al. 2012). MicroRNA166 accumulates to high levels in both wt Col seedling and infl, and is shown as an IP control. We isolated small RNAs from seedlings and spiked 4 $\mu$ g of purified seedling small RNA into infl crude protein extracts just after the cells were lysed. After each AGO1-IP, 1.2 $\mu$ g of small RNA was loaded per lane on the Northern blot. The purified seedling microRNA156 is not enriched in the spiked sample beyond the level it accumulates in the infl AGO1-IP control sample, indicated that AGO1 does not bind small RNAs after cell lysis.

# Supplemental Figure 2

**A**

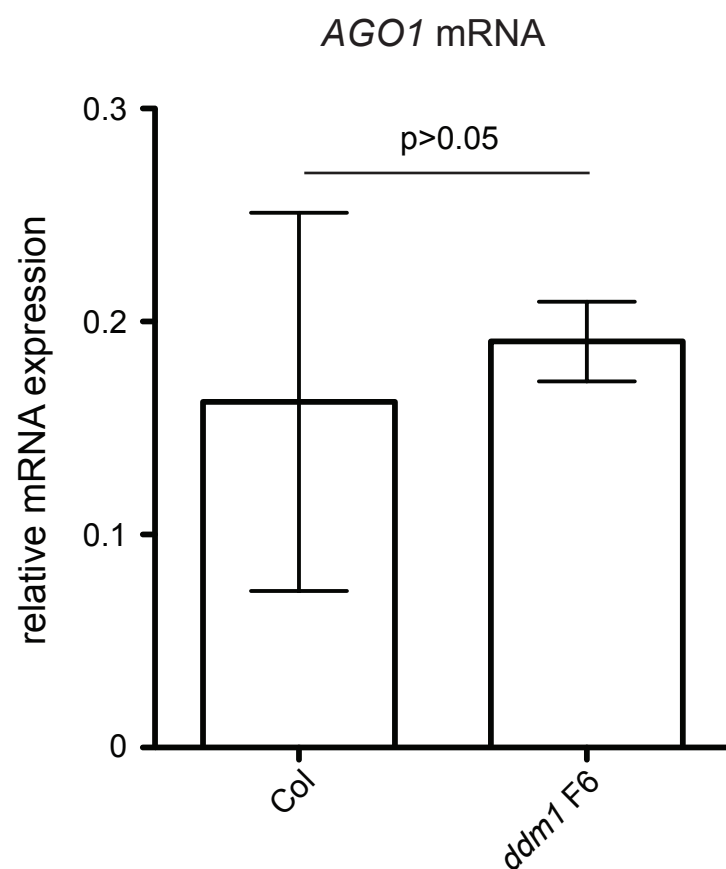

**B**

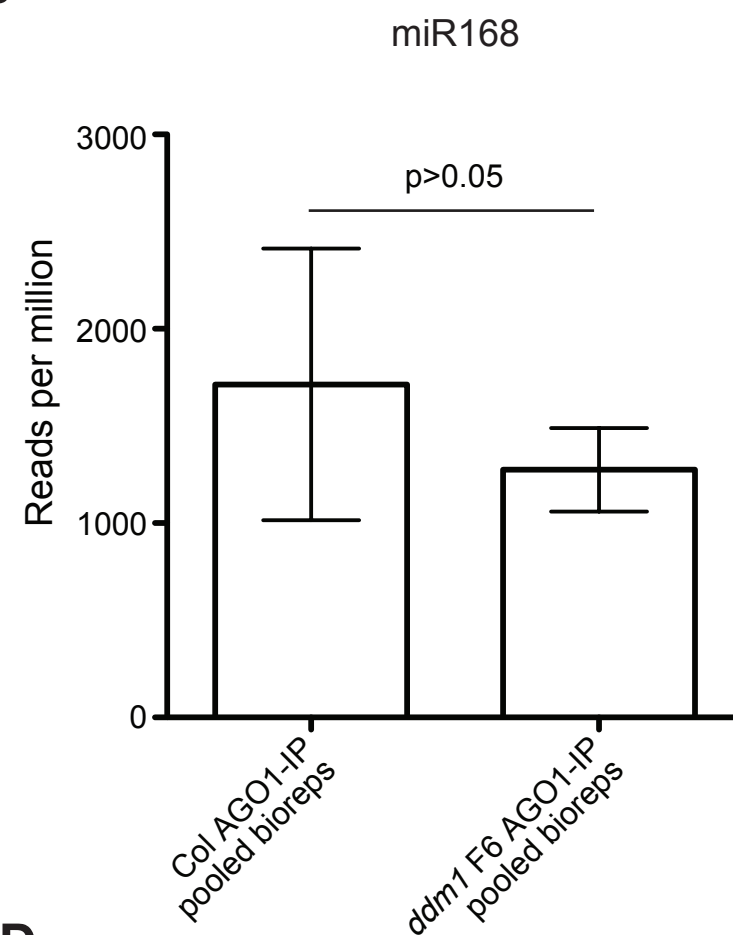

**C**

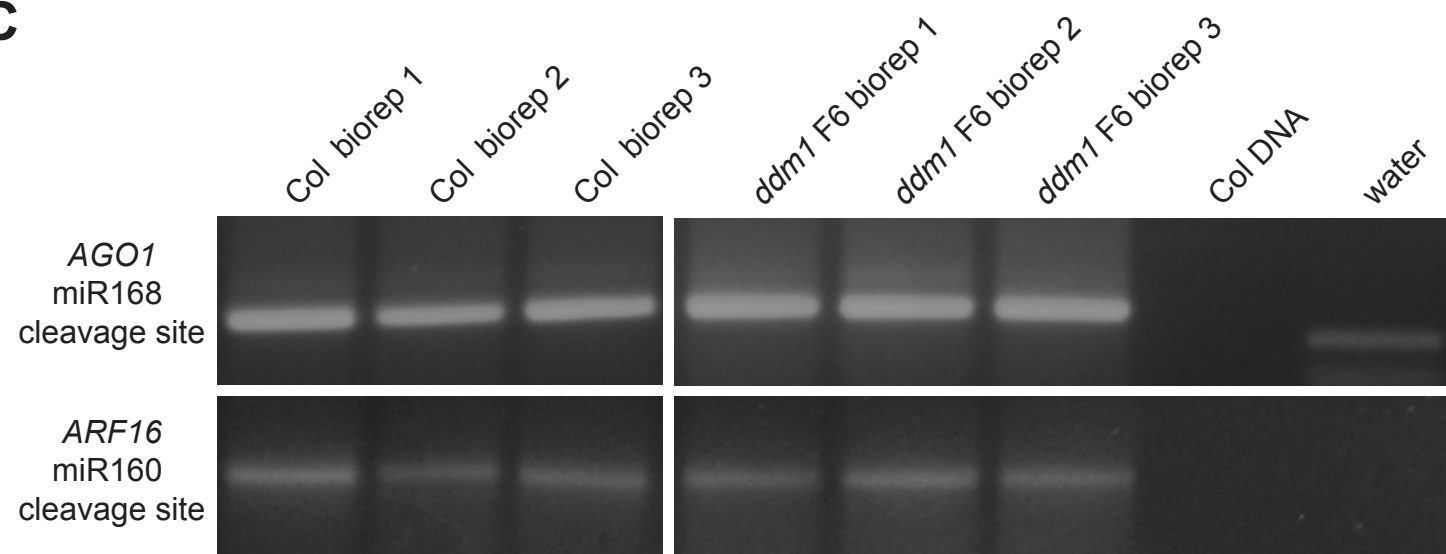

**D**

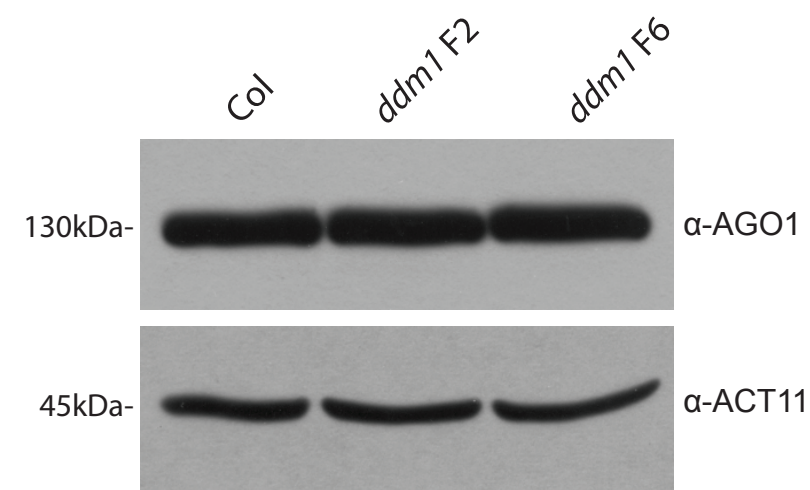

## Supplemental Figure 2. AGO1 protein and mRNA levels are unchanged in *ddm1* F6.

**A.** qRT-PCR analysis of expression of AGO1 mRNA. AGO1 mRNA levels are unchanged in *ddm1* F6 inflorescences compared to wt Col.

**B.** MicroRNA168 (which targets AGO1 mRNA) accumulation in *ddm1* F6 AGO1-IP does not change compared to wt Col AGO1-IP.

**C.** Modified 5' RACE RT-PCR was used to assess changes in the levels of cleaved mRNA at discrete microRNA168 slice sites. Accumulation of AGO1 mRNA sliced at the miR168 target site does not change in *ddm1* F6 samples. ARF16 mRNA sliced at the miR160 target site is used as a control, as miR160 accumulation does not change in *ddm1* F6 AGO1-IP.

**D.** Western blot analysis of AGO1 protein accumulation. AGO1 protein accumulation does not change in *ddm1* F6 inflorescences. ACT11 is used as a protein loading control.

# Supplemental Figure 3

**A**

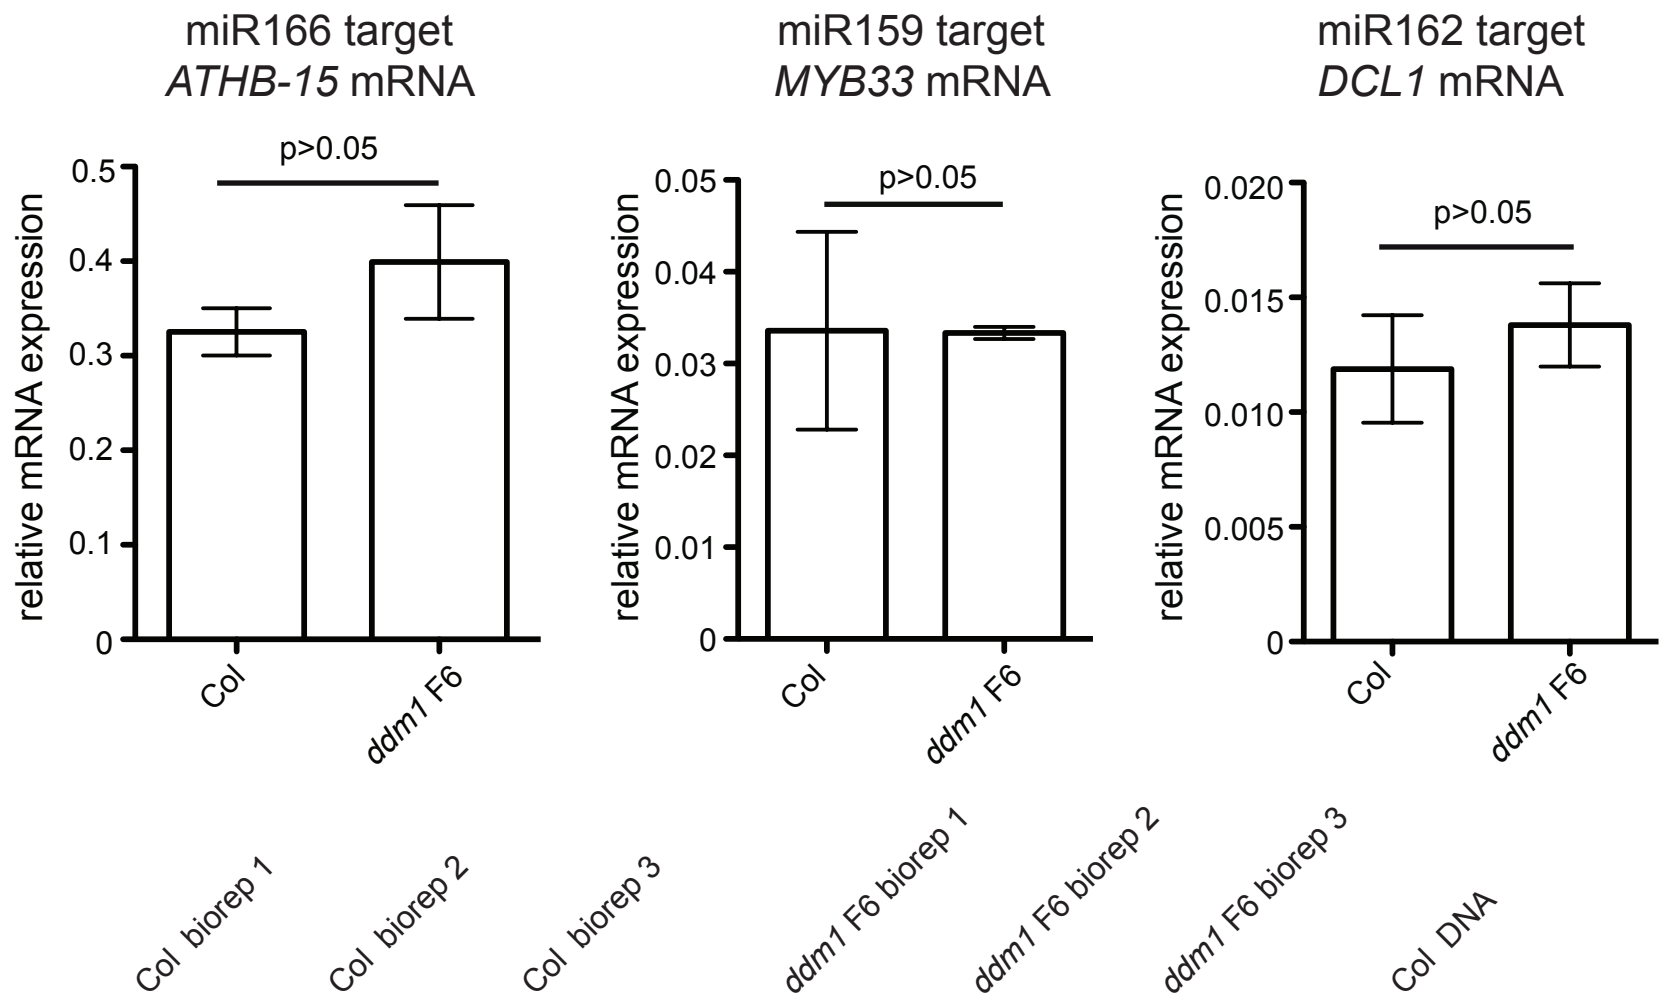

**B**

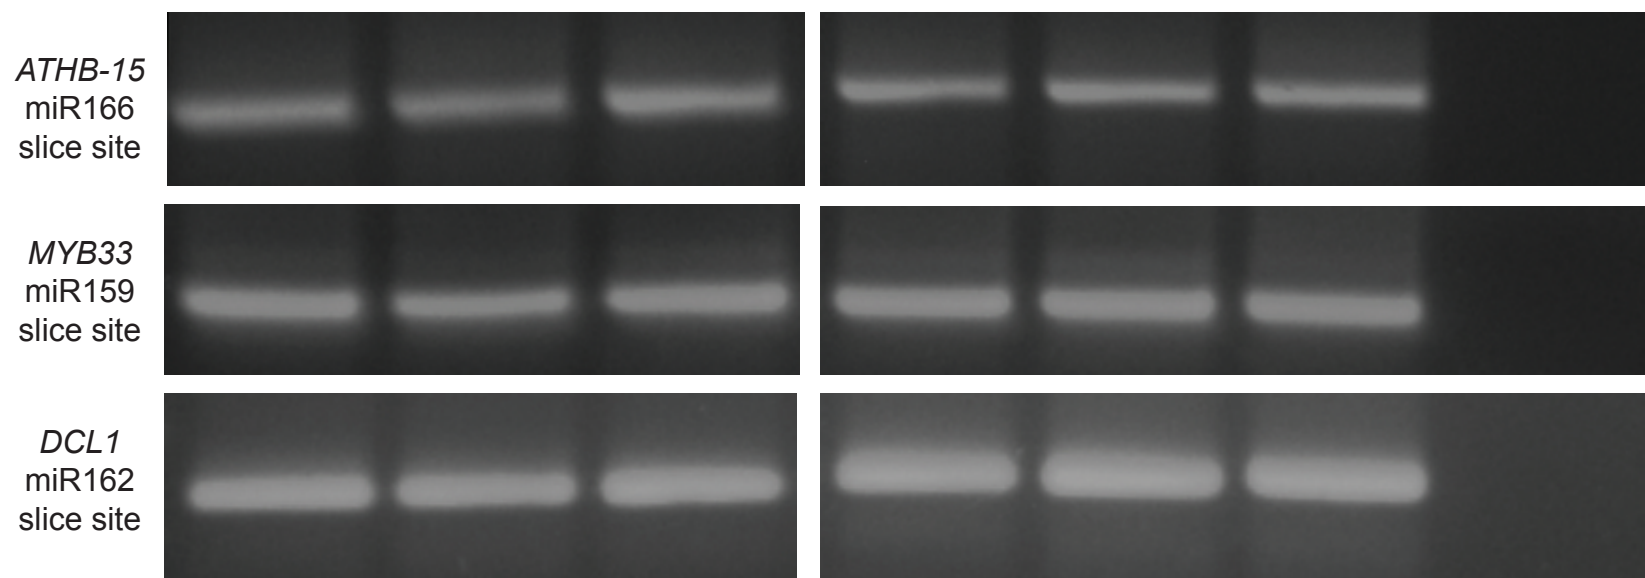

**Supplemental Figure 3. Changes in microRNA accumulation in *ddm1* F6 mutants do not affect target mRNA accumulation.**

**A.** qRT-PCR analysis of expression of microRNA targets, *ATHB-16*, *MYB33*, and *DCL1*, indicates that changes in microRNA accumulation do not affect changes in accumulation of their target mRNA. PCR primers were used in this assay that span the microRNA cleavage site, thus detecting only un-sliced mRNAs.

**B.** Modified 5' RACE was used to assess changes in the levels of cleaved mRNA at discrete slice sites. Accumulation of sliced *ATHB-16*, *MYB33*, and *DCL1* mRNA (at their microRNA166, microRNA159, and microRNA162 target sites, respectively) does not change in *ddm1* F6 mutants.

# Supplemental Figure 4

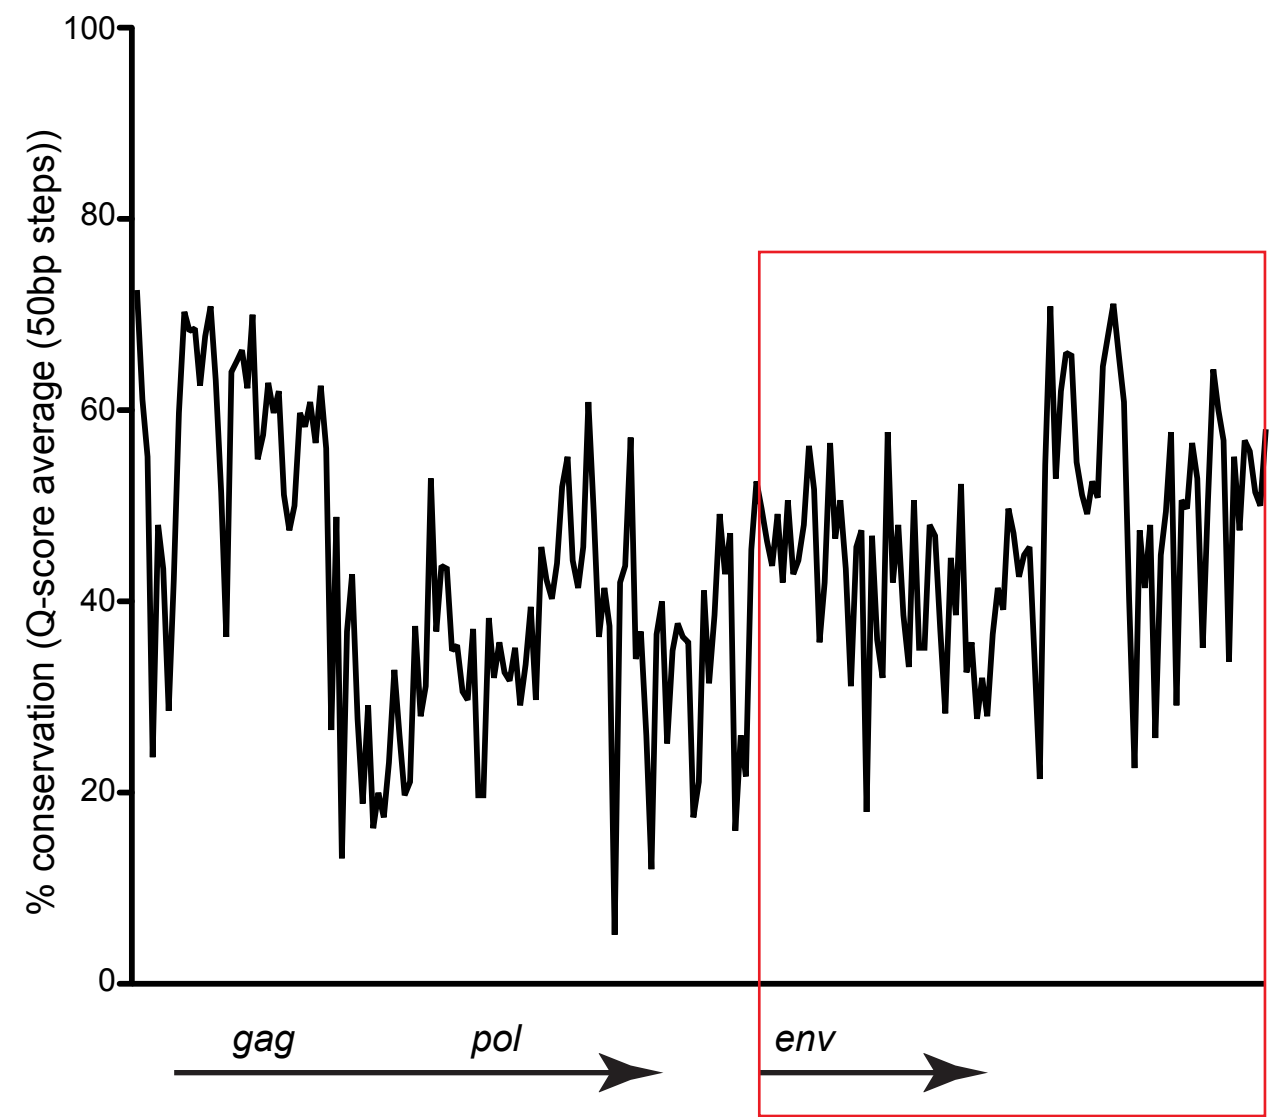

**Supplemental Figure 4. DNA identity and conservation between *Athila* subfamily elements**

Individual *Athila* consensus elements for the 9 *Athila* subfamilies were downloaded from the RepBase repeat masking of the Arabidopsis genome (<http://www.girinst.org/replibase/update/browse.php>). These *Athila* subfamily consensus elements were used in DNA identity alignments generated by ClustalW2. The x-axis represents the consensus *Athila6A* element, with two protein coding regions: *gag/pol* and *env*. The red box represents the region of 21-22 nt siRNA production from Figure 2D. Portions of the non-protein coding region 3' of *env* have just as much DNA sequence conservation as the *gag* protein coding domain.

Supplemental Table 1

**21-22 nt TE siRNAs that accumulate to over 100 RPM in all combined wt Col AGO1-IPs**

| siRNA Sequence         | siRNA size (nt) | TE family   | siRNA RPM in Col AGO1-IP | siRNA RPM in <i>ddm1</i> F6 AGO1-IP |
|------------------------|-----------------|-------------|--------------------------|-------------------------------------|
| UAUGGAAGAAUUGUAGUAAU   | 21              | VANDAL4     | 314                      | 539                                 |
| UUGAGAAGAGAUAGAAUAGAA  | 21              | ATHILA4     | 242                      | 282                                 |
| UUUGGACUGAAGGGAGCUCU   | 21              | ATGP3       | 228                      | 110                                 |
| UUUGGGAGUAGCCAUAUAGCCU | 22              | RathE2_cons | 166                      | 13                                  |
| UGAGCUGUGAUGAAAUUGGCU  | 21              | HELITRONY1B | 147                      | 38                                  |

**21-22 nt TE siRNAs that accumulate to over 100 RPM in the combined *ddm1* F6 AGO1-IPs**

| siRNA Sequence          | siRNA size (nt) | TE family | siRNA RPM in Col AGO1-IP | siRNA RPM in <i>ddm1</i> F6 AGO1-IP | fold increase in <i>ddm1</i> F6 |
|-------------------------|-----------------|-----------|--------------------------|-------------------------------------|---------------------------------|
| UGGCGCUC AACUCUGCAAGGU  | 21              | ATHILA6A  | 4                        | 10625                               | 2491                            |
| UCCCCAGAAAGUCGUUCAGCUC  | 21              | ATHILA6A  | 11                       | 6552                                | 588                             |
| UUCGAGGAGAUAGACGCGCC    | 21              | ATHILA2   | 19                       | 4887                                | 254                             |
| UUGGCGCUC AACUCUGCAAGG  | 21              | ATHILA6A  | 2                        | 4868                                | 2731                            |
| UUGAUCCAAGUAGCUGACUCU   | 21              | ATHILA6A  | 1                        | 4031                                | 5276                            |
| UUGAGAGAUCCCCUGUUACUG   | 21              | ATHILA2   | 5                        | 3917                                | 799                             |
| UUUGGCGCUC AACUCUGCAAG  | 21              | ATHILA6A  | 2                        | 3787                                | 1608                            |
| UUACGAGACUCUAGCCAGCU    | 21              | ATHILA6A  | 3                        | 3733                                | 1086                            |
| UACCCGUACGUCGCUUACAAG   | 21              | ATHILA6A  | 5                        | 3223                                | 693                             |
| CGAGAGAUUACAGGACUGUC    | 21              | ATHILA2   | 3                        | 3198                                | 930                             |
| UUAUCCAAGUAGCUGACUCU    | 21              | ATHILA2   | 1                        | 2805                                | 3388                            |
| AUUGACGUCGAGUAUGAGCCU   | 21              | ATHILA6A  | 7                        | 2734                                | 373                             |
| UUUGGCGCUC AACUCUGCAAGG | 22              | ATHILA6A  | 5                        | 2546                                | 482                             |
| UUACCCGUACGUCGCUUACAAG  | 22              | ATHILA6A  | 25                       | 2330                                | 93                              |
| UCUAAAUCCAUAUCCUCGGA    | 21              | ATHILA6A  | 1                        | 2013                                | 1506                            |
| UAGCUAAACAAGAACUCUUUCU  | 21              | ATHILA6A  | 1                        | 1828                                | 2871                            |
| UUCCCCUAGAAUUCUUCCCU    | 21              | ATHILA6A  | 1                        | 1646                                | 2154                            |
| UCCACCGACUGAUGACAAGU    | 21              | ATHILA6A  | 2                        | 1524                                | 772                             |
| UGACGGACAAGAUAGUUGCU    | 21              | ATHILA6A  | 1                        | 1505                                | 1576                            |
| UGAAGGACAAGCUCAGCUGCU   | 21              | ATHILA2   | 3                        | 1483                                | 518                             |
| UCUCAUGUAGUUCUAGUUCGCA  | 22              | ATHILA2   | 1                        | 1437                                | 1881                            |
| UUCAGGGUGAGAACAUUGACU   | 21              | ATHILA6A  | 1                        | 1291                                | 1690                            |
| UUAGACACGGUGCCUGUAGAUU  | 22              | ATHILA6A  | 16                       | 1275                                | 79                              |
| UUUGGCACUC AACUCUGCAAG  | 21              | ATHILA6A  | 3                        | 1274                                | 408                             |
| UUCGAGAACUCCUGACCCGA    | 21              | ATHILA6A  | 1                        | 1272                                | 1537                            |
| UCGAAUGAUGAAUGCCUUGCA   | 21              | ATHILA6A  | 4                        | 1259                                | 287                             |
| UCUGUAUGCAUAACUUGGGAC   | 21              | ATHILA6A  | 5                        | 1212                                | 221                             |
| UGGCGCUC AACUCUGCGAGGU  | 21              | ATHILA6A  | 1                        | 1187                                | 1434                            |
| UUUAGGAUUGUUGCAUAUGCA   | 21              | ATHILA2   | 1                        | 1164                                | 2032                            |
| ACAAAACUGUUGAACAAGCCU   | 21              | ATHILA6A  | 2                        | 1107                                | 561                             |
| AUCCAAGUAGCUGACUCUCCU   | 21              | ATHILA2   | 1                        | 1104                                | 1020                            |
| CUUGGCAUCGAAUUGAACUC    | 21              | ATHILA6B  | 0                        | 1059                                | 2771                            |
| UUUAAACAACUAAGGUUCCUGU  | 21              | ATHILA2   | 0                        | 1055                                | 5524                            |
| UUCUGAAGGACAAGCUCAGCU   | 21              | ATHILA2   | 1                        | 1012                                | 1987                            |
| AAACAGGACAAGUACUCGCC    | 21              | ATHILA2   | 5                        | 986                                 | 209                             |
| CUCAGGCUC AUACUCGACGUC  | 21              | ATHILA6A  | 2                        | 968                                 | 475                             |
| UUGGCGCUC AACUCUGCAAGGU | 22              | ATHILA6A  | 6                        | 955                                 | 163                             |
| UACUGGAGGACGUACAGCACU   | 21              | ATHILA6A  | 1                        | 949                                 | 994                             |
| UAUGGAGAUAGCUGCAUUGGC   | 21              | ATHILA6A  | 3                        | 937                                 | 300                             |
| UUGAAAGACUUGUGGAUACCC   | 21              | ATHILA2   | 4                        | 926                                 | 217                             |
| UAGGCCUCAGAUUGACGCCU    | 21              | ATHILA2   | 1                        | 875                                 | 723                             |
| UGGCACUCAACUCUGCAAGGU   | 21              | ATHILA6A  | 1                        | 834                                 | 819                             |
| UACUUCAGCGUUCUGUAGCC    | 21              | ATHILA2   | 2                        | 826                                 | 360                             |
| UGACACCGAUUCUGAUAGCUU   | 21              | ATHILA2   | 1                        | 823                                 | 862                             |
| UUUGAUCCGAGGAUGAUGGAU   | 21              | ATHILA6A  | 0                        | 816                                 | 4275                            |
| UCGAAUGACGAAUUGCCUAGCC  | 21              | ATHILA2   | 3                        | 814                                 | 312                             |
| UGAGAGAUCCCCUGUUAUGA    | 21              | ATHILA2   | 1                        | 786                                 | 1122                            |
| AUUUGAACUCUAGGAUACCCU   | 21              | ATHILA2   | 0                        | 768                                 | 3015                            |
| UUGAGAAGAUACAUGACGGU    | 21              | ATHILA    | 0                        | 731                                 | 3825                            |
| UAACUCUACCCUUGCACUCG    | 21              | ATHILA6A  | 0                        | 727                                 | 2855                            |
| UCUGUAUGCAUAACUUGGGACU  | 22              | ATHILA6A  | 7                        | 686                                 | 103                             |
| UCCAGGCCAUAGACGAACCU    | 21              | ATHILA2   | 1                        | 684                                 | 672                             |
| UUGGACGCCUCUACUUAUGA    | 21              | ATHILA2   | 0                        | 679                                 | 1523                            |
| UUUGGUUCUGAGUCCCGCCU    | 21              | ATHILA6A  | 1                        | 669                                 | 1168                            |
| CGAAUGACGAAUGCCUAGCCU   | 21              | ATHILA2   | 1                        | 662                                 | 612                             |
| UUGGUACAGGUGCUAACAUC    | 21              | ATHILA2   | 1                        | 652                                 | 731                             |
| UUUGAGAGAUCCCCUGUUAUCG  | 22              | ATHILA2   | 2                        | 632                                 | 310                             |
| UAUCAGAAUCGGUGUACAAC    | 21              | ATHILA2   | 1                        | 614                                 | 439                             |
| UUGGCACUCAACUCUGCAAGG   | 21              | ATHILA6A  | 0                        | 611                                 | 1918                            |
| UGUGGUGACUUGGCUAGGCC    | 21              | ATHILA6A  | 0                        | 609                                 | 2391                            |
| UGUUGAUCCAAGUAGCUGACU   | 21              | ATHILA6A  | 0                        | 608                                 | 608                             |
| UCCAAGUAGCUGACUCUCCU    | 21              | ATHILA2   | 0                        | 596                                 | 4683                            |
| UGAAUGACAAACUGGACAAGCU  | 22              | ATHILA6B  | 2                        | 583                                 | 241                             |
| UGUUACGAGACUCUAGCCAG    | 21              | ATHILA6A  | 1                        | 574                                 | 1126                            |
| UCCCCAGAAUGCUGUACGCU    | 22              | ATHILA6A  | 9                        | 558                                 | 60                              |
| UUAGACACGGUGCCUGUAGAU   | 21              | ATHILA2   | 1                        | 552                                 | 619                             |
| UUGUUGAUCCAAGUAGCUGACU  | 22              | ATHILA6A  | 0                        | 539                                 | 8473                            |
| UAUAGGGCUUGAAAGAAAGUC   | 21              | ATHILA2   | 0                        | 535                                 | 2801                            |
| UAUUGACGUCGAGUAUGGCCU   | 22              | ATHILA6A  | 27                       | 517                                 | 19                              |
| UUGGGAGAACUAUGACACGAG   | 21              | ATHILA    | 0                        | 515                                 | 4045                            |
| CUUCGAGGAGAUAGACGCGCC   | 22              | ATHILA2   | 47                       | 513                                 | 11                              |
| UAGACACGGUGCCUGUAGAUU   | 21              | ATHILA6A  | 1                        | 505                                 | 529                             |
| UCUGAACUCAAGGCCACCCAA   | 21              | ATHILA6A  | 0                        | 493                                 | 1549                            |
| UGAAGUCAAUUGUUCACCCU    | 21              | ATHILA6A  | 1                        | 486                                 | 545                             |
| UUUCUGACGGACAAGAUAGU    | 21              | ATHILA6A  | 0                        | 480                                 | 1257                            |
| UGAAGGAUUUGUGUUAACCA    | 21              | ATHILA6A  | 1                        | 474                                 | 744                             |
| UAACUCUACCCUUGGACUCA    | 21              | ATHILA6B  | 0                        | 473                                 | 1239                            |
| UCUGUAUGCAUAGCUUGGGACU  | 22              | ATHILA2   | 1                        | 466                                 | 915                             |
| CACCGCGGUCGCGUAAGCUAC   | 21              | ATHILA6B  | 2                        | 466                                 | 198                             |
| UUCACAUGUCCGGGCUAGGCA   | 21              | ATHILA2   | 0                        | 461                                 | 1208                            |
| UAGUACCGAGUAGUACCAAC    | 21              | ATHILA6A  | 0                        | 461                                 | 1035                            |
| UUUCCGUUGGUGGCGCCAC     | 21              | ATHILA6A  | 0                        | 458                                 | 1799                            |
| UCCAGAACUAAUGAAUUGUA    | 21              | ATHILA2   | 0                        | 448                                 | 1172                            |
| UUACGAGACUCUAGCCCAACU   | 21              | ATHILA6A  | 1                        | 447                                 | 780                             |
| CCACCGACUGAUGACAAGUC    | 21              | ATHILA6A  | 0                        | 446                                 | 2334                            |

|                         |    |          |    |     |      |
|-------------------------|----|----------|----|-----|------|
| UUGGACGUCUCUACUUAUGAGA  | 21 | ATHILA2  | 0  | 437 | 6871 |
| UCCCCAGGCUCGAAUUAUGAA   | 21 | ATHILA6A | 2  | 433 | 272  |
| UCUAGUUCACAUUUUUCGGAC   | 21 | ATHILA2  | 0  | 427 | 3350 |
| AUAGCUAACAAAGAACUCUUUCU | 22 | ATHILA2  | 0  | 426 | 3342 |
| UCGAACAAGAGCUGAACGUCU   | 21 | ATHILA   | 0  | 423 | 949  |
| UCUAGUUCGCAUUUUUUGGAC   | 21 | ATHILA2  | 0  | 421 | 2205 |
| UGAAGUCAAUUUCUCCUGCCU   | 21 | ATHILA2  | 1  | 418 | 468  |
| UGACGUCGAGUAUGAGCCUGA   | 21 | ATHILA6A | 1  | 416 | 654  |
| UGAAGGACAAGAUACGUCUGCU  | 21 | ATHILA2  | 2  | 415 | 167  |
| UGCAUAACUUGGGACUUAACCU  | 21 | ATHILA6B | 2  | 413 | 180  |
| UCAGAAUCGGUGUCACAACGC   | 21 | ATHILA6A | 1  | 411 | 807  |
| UACCGGAGGACGUACAUAGCU   | 21 | ATHILA6A | 0  | 401 | 6304 |
| CUUCCCCUAGAAUUCUUUCCC   | 21 | ATHILA2  | 0  | 401 | 1049 |
| UGGAUUCGGGCGUCAUACUCC   | 21 | ATHILA5  | 9  | 392 | 42   |
| UUUAGAGAUCCCCUGUUACUG   | 21 | ATHILA2  | 1  | 387 | 760  |
| UUAAUCUACCCUUGGCACUC    | 21 | ATHILA6A | 0  | 380 | 1992 |
| UGCACUCGCUAGGUCUGGCAG   | 21 | ATHILA6A | 0  | 378 | 990  |
| UGACACCGAUUCUGAUUGCAU   | 21 | ATHILA6A | 0  | 377 | 1479 |
| UUUGGCCUGAGGUUGGACGCC   | 21 | ATHILA2  | 1  | 367 | 641  |
| UCUUCGACUGAGGUAAGCGCCU  | 22 | ATHILA2  | 16 | 355 | 22   |
| UUCUGAAGGACAAGAUACGCU   | 21 | ATHILA2  | 1  | 351 | 502  |
| AUUCGAGAACUCCUGACCCG    | 21 | ATHILA6A | 0  | 350 | 1830 |
| UUGCAGAGUGGAGAGAAACUC   | 21 | ATHILA6A | 1  | 347 | 495  |
| UAUGCUUCUGUUAUCCACCU    | 21 | ATHILA6A | 1  | 344 | 601  |
| CUUAAAUCACACAGUCCACUG   | 21 | ATHILA2  | 0  | 342 | 1789 |
| UUGGCAUCGAAUUUGAACUCA   | 21 | ATHILA6B | 0  | 339 | 5325 |
| UUAGACACGGUGCCUGUAGAC   | 21 | ATHILA2  | 2  | 335 | 150  |
| UAUCCUGAGAGCGGUGCUGGC   | 21 | ATHILA2  | 0  | 334 | 875  |
| UUGGGCAGCGAUUCUGAAAG    | 21 | ATHILA2  | 2  | 334 | 188  |
| UCGAGGGCAGGAACAUAUGACU  | 21 | ATHILA2  | 1  | 334 | 375  |
| UAUGCAUAACUUGGACUUAACC  | 22 | ATHILA6A | 20 | 333 | 17   |
| UUAGCACCGAGGAUGAUGGACU  | 22 | ATHILA2  | 5  | 330 | 66   |
| UUAGACACGGUACCUUGAUAU   | 22 | ATHILA6A | 3  | 329 | 115  |
| UUUGGCACUCAACUCUGCAAGG  | 22 | ATHILA6A | 2  | 325 | 213  |
| CAAACUGGACAAAGCUACUGCU  | 21 | ATHILA6B | 0  | 324 | 848  |
| UUCAUCUGCAGUAAGUCCUG    | 21 | ATHILA6A | 0  | 314 | 1645 |
| UUCUGACGGACAAGAUAAAGCU  | 21 | ATHILA6A | 0  | 313 | 1229 |
| CUACUCGGUCACUAGGCUCAG   | 21 | ATHILA6A | 0  | 311 | 814  |
| UUUAACAACGAACUCUUGGCC   | 21 | ATHILA5  | 12 | 310 | 25   |
| UACGAGACUCUAGCCCAGCUU   | 21 | ATHILA6A | 1  | 307 | 438  |
| UUCUGUAGCAGGAGUAUCCU    | 21 | ATHILA2  | 1  | 302 | 365  |
| UAAAACUGAACCAUGCCUAGA   | 21 | ATHILA2  | 0  | 302 | 1583 |
| UACCGGAGGACGUACAACACC   | 21 | ATHILA6A | 1  | 302 | 431  |
| UCUAGUUCGCGUUCUUCAGAC   | 21 | ATHILA6A | 0  | 300 | 4713 |
| UAUGGCCUGGGAGCAAUCGCA   | 21 | ATHILA2  | 0  | 299 | 1174 |
| UAAUAAGGAGAGUCAGCUACU   | 21 | ATHILA2  | 0  | 298 | 298  |
| UAUCUCUGUCGUUAAGAACCU   | 21 | ATHILA6A | 0  | 295 | 2318 |
| UUAGCACCGAGGAUGAUGGAC   | 21 | ATHILA2  | 6  | 291 | 48   |
| CUUAUCAACGAACUCUUGGCC   | 21 | ATHILA5  | 11 | 290 | 27   |
| UAAGCAUUUUUAUUAACCGGA   | 21 | ATHILA2  | 0  | 285 | 4479 |
| UGUGGUGACUUGGCUAGGCCU   | 22 | ATHILA6A | 2  | 283 | 131  |
| CAAAUUCGAGAACUCCUGAC    | 21 | ATHILA6A | 0  | 283 | 283  |
| UUCCAGAAUUGGCGUCACAAC   | 21 | ATHILA6A | 0  | 283 | 1481 |
| UCCGCUAGAUUAUUAACUCG    | 21 | ATHILA2  | 0  | 281 | 4421 |
| UGUCCCAACUUAACUCUACCCU  | 22 | ATHILA6A | 0  | 279 | 1459 |
| UCUGUACCGCUGAAUUCUUC    | 21 | ATHILA2  | 2  | 275 | 120  |
| CGUCACUGCGAAUUCUGGAG    | 21 | ATHILA2  | 1  | 272 | 475  |
| UCCUAUCCAGUCUGAAGAACGC  | 22 | ATHILA6A | 0  | 272 | 1068 |
| UUGGCCUGAGGUUGGACGCCU   | 21 | ATHILA2  | 1  | 272 | 534  |
| UACGUCACUGCGAAUUCUGGA   | 22 | ATHILA2  | 4  | 271 | 75   |
| UAAUGUCUGUACGUCCUCCAG   | 21 | ATHILA6A | 0  | 271 | 1417 |
| UGUAUAUCCUGGGGUACAG     | 21 | ATHILA6A | 1  | 271 | 425  |
| CCUGAGCCUAGUGACCGAGUA   | 21 | ATHILA6A | 1  | 270 | 531  |
| UUACCCGUACGUCUUAUAAG    | 22 | ATHILA6A | 1  | 267 | 191  |
| UCGAGUGAGUGUAGCCUCCU    | 21 | ATHILA2  | 2  | 266 | 174  |
| UUCUUCAGACUGGAUAGGACU   | 21 | ATHILA6A | 0  | 265 | 4162 |
| AUUCGAGAACUCCUGACCCGA   | 22 | ATHILA6A | 0  | 265 | 594  |
| UGAAAUAAAACUGAACCAUGCC  | 22 | ATHILA2  | 0  | 263 | 825  |
| UUGAGAGCCUUGUAGUAGUCU   | 21 | ATHILA   | 1  | 262 | 458  |
| UUGAGAGCACUCCACCGACUG   | 21 | ATHILA6A | 0  | 261 | 2050 |
| CUCGGGAGAAAAGAAAGGCU    | 21 | ATHILA6A | 1  | 259 | 453  |
| UGACGGACAAGAUAGCUGCU    | 21 | ATHILA6A | 0  | 259 | 580  |
| UCUGAUUGCUCUUUGACCUGG   | 21 | ATHILA2  | 0  | 258 | 1012 |
| UCUGUCAGAAACUUGAUGGCCU  | 22 | ATHILA6A | 2  | 256 | 154  |
| AAUUCGAGAACUCCUGACCC    | 21 | ATHILA6A | 0  | 255 | 2003 |
| UAUAGGGCUUGAAAGAAAGUU   | 21 | ATHILA6B | 0  | 252 | 252  |
| UCGAGUAUGAGCCUGAGUCAUG  | 22 | ATHILA6A | 1  | 250 | 393  |
| UCAUGUAGUUCUAGUUCGCCU   | 21 | ATHILA6A | 0  | 245 | 962  |
| UCGAGUGACUUUGGAGCCAUU   | 21 | ATHILA6B | 2  | 244 | 147  |
| UGAGACACAACAGGGAGAUUC   | 21 | ATHILA6A | 0  | 244 | 956  |
| CUACCGGGACUCGAAUGACGA   | 21 | ATHILA2  | 0  | 242 | 1904 |
| UUAAUCUACCCUUAUGCACUCA  | 22 | ATHILA6A | 0  | 240 | 538  |
| UAUUGACGUCGAGUAUGAGCC   | 21 | ATHILA6A | 1  | 237 | 466  |
| UAUCCAUUGCUCGCGGCUCGA   | 21 | ATHILA2  | 0  | 236 | 3710 |
| UCCCAACCCAUAGAUUAAGCG   | 21 | ATHILA6A | 0  | 236 | 3700 |
| UAACAAGAACUCUUCUUUUUCU  | 22 | ATHILA2  | 0  | 235 | 3689 |
| CUAGAAUUCUUCUCCUUUCCU   | 21 | ATHILA6A | 0  | 235 | 1843 |
| CUUCGACUGAGGUAAGCGCCU   | 21 | ATHILA2  | 1  | 234 | 263  |
| CGAAUAAGUGCUGUACGUCCU   | 21 | ATHILA6A | 1  | 234 | 459  |
| UAGAGUGUUAUGUAGUUGCA    | 21 | ATHILA6A | 0  | 232 | 1215 |
| CUUACUGUUGUUCUGUGAGCU   | 22 | ATHILA6A | 1  | 232 | 192  |
| UCCUUCGUCGCGGCCAGCACC   | 21 | ATHILA6B | 2  | 231 | 140  |
| UCCCGGGACUCGAAUGACGAA   | 21 | ATHILA2  | 1  | 231 | 181  |
| UUAGCCUGAGGUUGGACGCCU   | 21 | ATHILA2  | 0  | 231 | 1207 |
| CAUGCAAUCAGAAUCGGUGUC   | 21 | ATHILA6A | 0  | 230 | 1807 |
| UGAGAGCACUCCACCGACUGA   | 21 | ATHILA6A | 0  | 230 | 3605 |
| UUUGAACUCAUGGAUACCCUA   | 21 | ATHILA2  | 0  | 227 | 227  |

|                         |                |    |     |      |
|-------------------------|----------------|----|-----|------|
| UUUGGGUUUUGGGUUAACUGCU  | 21 ATHILA2     | 0  | 225 | 1765 |
| UACACUCACUUGAUCUAGGAG   | 21 ATHILA2     | 0  | 223 | 1753 |
| AUCAUCCUCGGAUCAAACCCU   | 21 ATHILA6A    | 0  | 222 | 3491 |
| UGUGGAUACAAGAGCUGGGCU   | 21 ATHILA2     | 1  | 215 | 423  |
| UCCAUUGCUCGCGGUCGAGUC   | 22 ATHILA2     | 3  | 214 | 70   |
| UUUAGCCUGAGGUUGGACGCC   | 21 ATHILA2     | 0  | 213 | 213  |
| UAUGGUGACUUGGCUCAGGCC   | 21 ATHILA6A    | 0  | 212 | 1666 |
| UACACAAAGGGCUCUCGCACC   | 22 ATHILA6A    | 0  | 211 | 474  |
| UCAUCCUCUGUAGCUUCCGUC   | 21 ATHILA6A    | 0  | 210 | 3296 |
| UCCUGAGUACUCUCUCCAAAG   | 21 ATHILA2     | 0  | 209 | 1643 |
| UUGAGAGAUCCCCUGUACUGA   | 22 ATHILA6A    | 2  | 208 | 86   |
| CUCACAAGUGAUUAGGGCUU    | 21 ATHILA2     | 0  | 208 | 1631 |
| UCUCAUGUAGUUCUAGUUCGCG  | 22 ATHILA6A    | 0  | 207 | 3251 |
| UUCUUUCCGUUGGUGUGCGCC   | 21 ATHILA6A    | 0  | 205 | 205  |
| AUUUGGCGCUCACUCUGCAA    | 21 ATHILA6A    | 0  | 204 | 3199 |
| AAAUAAAACUGAACCAUGCCU   | 21 ATHILA2     | 0  | 203 | 637  |
| AAAGUCAAGAACCCCAACCCU   | 21 ATHILA6A    | 1  | 201 | 315  |
| AUUUCAGUGAGCACGUACCUC   | 21 ATHILA6A    | 1  | 200 | 314  |
| UAGAGUUAAGUUGGACAGGA    | 21 ATHILA6B    | 0  | 199 | 1562 |
| CAACUAAACAAGCAGGGCACUG  | 21 ATHILA6B    | 0  | 198 | 1552 |
| UGAAUCUUGGUCAACUGGACC   | 21 ATHILA6A    | 1  | 197 | 282  |
| CAAAUCCUUAACUCUUCUCCU   | 21 ATHILA6A    | 0  | 197 | 3098 |
| UCUGUAUGCAUAGCUUGGGAC   | 21 ATHILA2     | 0  | 197 | 197  |
| CUGGGGUAACAGAACUUCGCU   | 21 ATHILA6A    | 0  | 197 | 515  |
| UGGGACUCCACAAGCUAUCAG   | 21 ATHILA2     | 0  | 197 | 772  |
| UUAGGCCUGAGAUUGGACGCC   | 21 ATHILA2     | 0  | 196 | 1028 |
| AUGGAUUUAGAUACUUGCGUC   | 22 ATHILA6A    | 2  | 196 | 128  |
| UUCCCGUUGGUGUGCGCCAC    | 21 ATHILA6A    | 0  | 196 | 1538 |
| UAGAAUUAUGAUGUCUUGGCA   | 21 ATHILA6B    | 0  | 194 | 3049 |
| UGCUCGUUAUCAUACUCCUCCU  | 21 ATHILA6A    | 0  | 194 | 1016 |
| CUAGAUCGAGUGAGUGUAGCCU  | 22 ATHILA2     | 10 | 193 | 19   |
| CAUGUCGUUUUCCAGAAACUC   | 21 ATHILA6A    | 0  | 192 | 1008 |
| UGCUCGUGUCAAACUCCGCCU   | 21 ATHILA6A    | 4  | 192 | 47   |
| UACCCGUACGUCGCCUACAAG   | 21 ATHILA6A    | 1  | 192 | 215  |
| CUUCCCCUAGAAUUCUUUCCCU  | 22 ATHILA6A    | 1  | 192 | 334  |
| CUUGCCCUUGUAGAAUCUGCU   | 21 ATHILA6B    | 0  | 191 | 999  |
| CAUUGACUUAAGCCUGCGCU    | 21 ATHILA6A    | 2  | 190 | 99   |
| UCUUGGCAUCGAAUUUGAACUC  | 22 ATHILA6A    | 0  | 189 | 991  |
| UACAGAAUAGGCUUAAGUAAC   | 21 ATHILA6B    | 0  | 189 | 2970 |
| UCACCAUUGGCAGCUCUGUACC  | 22 ATHILA2     | 3  | 187 | 74   |
| CCGAUUCUGAUUGCAUGUGGU   | 21 ATHILA6A    | 0  | 186 | 186  |
| UAGACACGGUACCUUGUAGAUU  | 21 ATHILA6A    | 0  | 185 | 970  |
| UACCCGUACGUCGCUUAUAAG   | 21 ATHILA6A    | 0  | 185 | 1451 |
| UGUCCUGAGGACGCUUCUCCU   | 21 ATHILA6A    | 0  | 184 | 961  |
| UACUCGACCACACUGUUAAGGA  | 21 ATHILA6A    | 0  | 183 | 1438 |
| UCGAGUACACAGAAUGGGCUG   | 21 ATHILA6B    | 0  | 179 | 940  |
| UUUUGCUUAGACUUAAGAAACU  | 21 HELITRONY1E | 2  | 179 | 112  |
| UGGCUUCGAAUUUGAACUCAU   | 21 ATHILA6A    | 0  | 178 | 2800 |
| UGUGAGUGUUUGUGAGGUCUU   | 21 ATHILA2     | 0  | 178 | 178  |
| UUGGCCUGAGGUUGGACACCU   | 21 ATHILA6A    | 0  | 178 | 399  |
| UUAGACACGGUGCCUGUAGACU  | 22 ATHILA2     | 11 | 177 | 16   |
| UACUGGAGGACGUACAACACU   | 21 ATHILA6A    | 1  | 176 | 307  |
| UUCCCCAGAAUCGUUUCAGCU   | 21 ATHILA6A    | 1  | 175 | 306  |
| CUCGAAUUGAUGAAUGCCUUGC  | 21 ATHILA2     | 1  | 175 | 275  |
| UUUGAUUACCCGGAUAAACUC   | 21 ATHILA2     | 0  | 175 | 1374 |
| UCGACCCACACUGUCAUGAUCU  | 21 ATHILA2     | 0  | 174 | 174  |
| UAGGGAGAAGGAUUGUAGCUC   | 21 ATHILA2     | 0  | 172 | 450  |
| UCUUGUCUUGAAACUUGCACC   | 21 ATHILA      | 0  | 171 | 894  |
| UUGACGACCAACUCCGCUCCU   | 21 ATHILA6A    | 0  | 170 | 669  |
| UCGAAUGACGAAUGCCUAGCCU  | 22 ATHILA2     | 5  | 170 | 33   |
| UUCUUCCCGUUGGUGUGCGCC   | 21 ATHILA6A    | 1  | 170 | 267  |
| CAAGAACCCGACACACUCG     | 21 ATHILA      | 0  | 169 | 885  |
| UCAGAAUCGUGUCACAAUGC    | 21 ATHILA2     | 0  | 169 | 663  |
| UCGAAUGACGAAUGCCUGGCC   | 21 ATHILA2     | 1  | 169 | 189  |
| UAGAUCGAGUGAGUGUAGCCU   | 21 ATHILA2     | 1  | 168 | 220  |
| UUUGUAAACUCAUGGUCACCC   | 22 ATHILA2     | 0  | 165 | 165  |
| UGCCAUUGACGAGCUGCCU     | 21 ATHILA6A    | 0  | 164 | 1286 |
| UCUAGUCCGAAAAUUGCGAAC   | 21 ATHILA2     | 0  | 163 | 163  |
| UUGGCGACCGAUCUCUGAAAGU  | 22 ATHILA2     | 3  | 163 | 48   |
| UCUAGUUCGCGUUUUUCAGAC   | 21 ATHILA6A    | 0  | 163 | 2562 |
| UGGCAGUAGGAGUACACGACU   | 21 ATHILA6A    | 1  | 163 | 319  |
| UAGUAACGGAUCACAGGGCUU   | 21 ATHILA6A    | 0  | 162 | 847  |
| UUUGAGCACUCUACAGACAGG   | 21 ATHILA2     | 0  | 162 | 1269 |
| CUAGAUCGAGUGAGUGUAGCC   | 21 ATHILA2     | 1  | 160 | 280  |
| UUCGAGCACUCCUGACCCGA    | 21 ATHILA6A    | 0  | 160 | 160  |
| UUCUUUGAACUUGACCGGGA    | 21 ATHILA5     | 2  | 158 | 75   |
| UGAGAACAUUGACUUCAGACCU  | 22 ATHILA6A    | 2  | 158 | 85   |
| UGAGAACGCUUGGCCAUUGGA   | 21 ATHILA2     | 0  | 158 | 2476 |
| UACAAAUUCGAGCACUCCUUG   | 21 ATHILA6A    | 0  | 156 | 491  |
| UCCAGCGUUCUGUAGCCAAC    | 21 ATHILA2     | 0  | 156 | 613  |
| CUACAAAUUCGAGCACUCCU    | 21 ATHILA6A    | 0  | 156 | 1222 |
| UUUGAGAGCACUCCACCGACU   | 21 ATHILA6A    | 0  | 156 | 2444 |
| UUGGACCGCGCCGAGUUUAGC   | 21 ATHILA2     | 0  | 155 | 812  |
| UAGAUCAAGUGAGUGUAGCCU   | 21 ATHILA2     | 0  | 155 | 607  |
| UCUUGGCAUCGAAUUUGAACU   | 21 ATHILA6A    | 0  | 154 | 1211 |
| UUUGAGCACUCUUGACCCGA    | 21 ATHILA6A    | 0  | 154 | 807  |
| UGACGCCAAUUCUGAAAGUUU   | 21 ATHILA2     | 0  | 154 | 1210 |
| UUCUUCGACUGAGGUAAGCGCC  | 22 ATHILA2     | 2  | 154 | 89   |
| ACUGAGCGCUGAUAGUAACGG   | 21 ATHILA6A    | 0  | 153 | 804  |
| UUAUGCUUCUGUUGAUCCACC   | 21 ATHILA6A    | 0  | 153 | 601  |
| UACCGGAGGACGUACAGCAUC   | 21 ATHILA2     | 1  | 153 | 120  |
| UAUGGAGAUUGAUCGCAUUGGCC | 22 ATHILA2     | 2  | 152 | 72   |
| UCAACGAACUCUUGGCCCUAGA  | 21 ATHILA5     | 18 | 152 | 8    |
| UUGUGGAUCCGUAGUCUGUA    | 22 ATHILA6B    | 3  | 152 | 58   |
| CUGAGGUCACAGGGAUUAUCG   | 22 ATHILA2     | 0  | 152 | 2381 |
| UAAGACUGAGAUACGCGUGCCU  | 21 VANDAL9     | 49 | 152 | 3    |
| UCCACUGUGUGAAUAAACUUG   | 21 ATHILA2     | 0  | 151 | 593  |

|                         |    |          |   |     |      |
|-------------------------|----|----------|---|-----|------|
| UGUCCCUACGGAAUAGCUGUA   | 21 | ATHILA2  | 0 | 150 | 1182 |
| UGUCUUUACCCGUACGUCGUU   | 21 | ATHILA6A | 1 | 150 | 197  |
| UUUUGAGACUCUAGCCCAGCU   | 21 | ATHILA6A | 0 | 149 | 1174 |
| UCGGGAGUAGAGUAUUGGCU    | 22 | ATHILA2  | 6 | 149 | 23   |
| UGUAGCUAAACUUGGGACUU    | 21 | ATHILA6A | 1 | 149 | 123  |
| UAAUGACCGAGUAGUACCACC   | 21 | ATHILA6A | 0 | 149 | 468  |
| UCGGCCUGAGGUUGGACGCCU   | 21 | ATHILA6A | 0 | 147 | 385  |
| UUCGGUCUGGCCAUACUCGGC   | 21 | ATHILA5  | 0 | 147 | 384  |
| UUCACUGAGAACGUAAGAAGC   | 22 | ATHILA2  | 2 | 146 | 66   |
| UCACCUCGCAUCUUAGAACUG   | 21 | ATHILA   | 0 | 146 | 762  |
| UCAAGAACUCCAACCCUUCACU  | 22 | ATHILA6A | 0 | 144 | 453  |
| UCAACACUCUGAUACAUCUAG   | 21 | ATHILA6A | 0 | 143 | 143  |
| AGUGAAUGAGGCGUGAUCUGC   | 21 | ATHILA2  | 0 | 142 | 1116 |
| UUCGCAGUGACGUAGGUGCUC   | 21 | ATHILA6A | 0 | 142 | 557  |
| CAAAUGACGAUUGCCUAGCCC   | 22 | ATHILA2  | 0 | 142 | 142  |
| UAUCGAGCACCUACGUCACUGU  | 21 | ATHILA2  | 4 | 142 | 36   |
| UCUAGUUCGCAUUUUUCGGAC   | 21 | ATHILA2  | 0 | 142 | 142  |
| UUGUGAGUGUUUGUGAGGUCU   | 21 | ATHILA2  | 0 | 141 | 141  |
| UUGAGAGAUCCCUUGUACUG    | 21 | ATHILA6A | 0 | 141 | 2218 |
| UGAGCGCUGAUAGUAACGGAU   | 21 | ATHILA6A | 0 | 141 | 1104 |
| UUGAGAGCACUCCACCGACUGA  | 22 | ATHILA6A | 0 | 140 | 1101 |
| UGACUCAGGCUCAUACUCGAC   | 21 | ATHILA6A | 0 | 139 | 1095 |
| UUUGUAAACUCAUGGUCACC    | 21 | ATHILA2  | 0 | 138 | 138  |
| UUGGCAACCGAUCUCUGAAAG   | 21 | ATHILA2  | 1 | 138 | 109  |
| UCACUUUGCUGAACAUGUACC   | 21 | ATHILA2  | 0 | 138 | 2164 |
| UUAGAAUUUAUCAGUCUUGGC   | 21 | ATHILA6A | 0 | 138 | 138  |
| UCGAUUAUCCAUUGCUCGCGGCU | 22 | ATHILA2  | 5 | 137 | 29   |
| UCCAGUCUGAAGAACGCGAAC   | 21 | ATHILA6A | 0 | 136 | 136  |
| UUCCUGGGGUACAGAAAUUC    | 22 | ATHILA6A | 3 | 135 | 46   |
| UUUGUAUGCAUAACUUGGGAC   | 21 | ATHILA5  | 0 | 135 | 2119 |
| UCGGGAUCCUGUGAAUGGUC    | 21 | ATHILA6A | 0 | 135 | 1057 |
| UAAGGAGAGUCAGCUACUUGGA  | 22 | ATHILA2  | 0 | 134 | 2102 |
| CAACGCUCUUGAUACAUCUAG   | 21 | ATHILA6A | 0 | 133 | 133  |
| UUUGGCCUGAGGUUGGACACC   | 21 | ATHILA6A | 0 | 133 | 697  |
| UUUUAAUUAAGUAGCUGACU    | 21 | ATHILA6A | 0 | 133 | 133  |
| CGGUGCCUGUAGAUUCCUGG    | 21 | ATHILA6A | 0 | 133 | 347  |
| CUUCUUAAGAAGAUCCGUCCU   | 21 | ATHILA2  | 0 | 132 | 295  |
| UCCGGCGGAGAAUCCUGUAAAG  | 22 | ATHILA2  | 5 | 131 | 25   |
| UUGACUUCAGACCUUGCGGUG   | 21 | ATHILA6A | 0 | 131 | 131  |
| UUGGCAUCGAAUUUGAACUCAU  | 22 | ATHILA6B | 0 | 131 | 131  |
| UUACCCGUACGUCGUUACAA    | 21 | ATHILA6A | 0 | 130 | 683  |
| UCGGCUCAAACCUAACACGUU   | 21 | ATHILA   | 0 | 129 | 2031 |
| UUACCCGUACGUCGUUACAG    | 21 | ATHILA6A | 1 | 129 | 185  |
| UAAACUACGAGACUGCAGAAAG  | 21 | ATHILA2  | 1 | 129 | 156  |
| UGCCUGUAGAUUCCCUAGAGU   | 21 | ATHILA6A | 0 | 129 | 1011 |
| AUUGAUUCUGCACUCAAGGGC   | 21 | ATHILA6A | 0 | 128 | 287  |
| UAUCGGUGUGACCUACGGGCU   | 21 | ATHILA2  | 0 | 128 | 2006 |
| AUGCCUGUAGAUUCCCUAGAG   | 21 | ATHILA6A | 0 | 127 | 1000 |
| AUACCCAAACCUGAACUUUCU   | 21 | ATHILA6A | 0 | 127 | 1999 |
| UGGAGAUAGAUUAUUGCGC     | 21 | ATHILA2  | 3 | 126 | 40   |
| UCGGUACAUAGGCUCAGGCCU   | 21 | ATHILA6A | 1 | 126 | 165  |
| UUAGACACGGUACCUUGAGAU   | 21 | ATHILA6A | 0 | 126 | 987  |
| UGCCUAGAUUGCUCUACUCGA   | 21 | ATHILA6A | 0 | 125 | 1967 |
| CAUCAAGAACCUGUACUGCCU   | 21 | ATHILA   | 0 | 125 | 491  |
| UUUGAGAGACUCCACCGACUG   | 22 | ATHILA6A | 0 | 125 | 980  |
| UACUCGUGUCAAAACUCCGCCU  | 21 | ATHILA2  | 0 | 123 | 277  |
| UCACUGUGAAUCCUGGAGUU    | 22 | ATHILA2  | 0 | 123 | 123  |
| UUAACUCUACCCUUUGCACUCG  | 21 | ATHILA6A | 0 | 123 | 1937 |
| UAUGAGUUGAUCGACGAAGAU   | 21 | ATHILA6A | 0 | 123 | 967  |
| AAACACUCUAGACUCGAUCCU   | 21 | ATHILA6A | 0 | 123 | 386  |
| UCUGGGUAGAUUGGAUCUUUAUC | 22 | ATHILA2  | 0 | 123 | 643  |
| UAUCGAGACCUACGUCACUG    | 21 | ATHILA2  | 0 | 123 | 386  |
| UGUCACCGUAGAUUUUCUCCU   | 21 | ATENSPM5 | 0 | 123 | 1926 |
| CCACCGACUGAUGACAACGUC   | 21 | ATHILA6A | 0 | 122 | 122  |
| IACGCUAGGGGAUUAUCUGCC   | 22 | ATHILA   | 0 | 122 | 122  |
| UAGAAUCUGCUGUAACAUUU    | 21 | ATHILA6B | 0 | 122 | 122  |
| UUCUAGUUCGCGUUCUAGAGAC  | 21 | ATHILA6A | 0 | 122 | 1913 |
| CUUCUCUGUCAUACUUGGGCC   | 21 | ATHILA6A | 0 | 121 | 121  |
| UCGACCAACACUGUUAAGGAUCU | 21 | ATHILA6A | 0 | 121 | 121  |
| UUCAACUCUUCUCCUCUGGAACU | 22 | ATHILA6A | 0 | 119 | 268  |
| CUUUGCACUCAUGAAUCUUUC   | 21 | ATHILA6A | 0 | 119 | 467  |
| UGGCGCUCUACUCUGCAAGGUC  | 21 | ATHILA6A | 1 | 119 | 233  |
| UUUGCUGAACAUUACCUCCA    | 22 | ATHILA2  | 0 | 119 | 467  |
| IACGCGACCGCGGUGCUGGCC   | 21 | ATHILA2  | 0 | 119 | 372  |
| UUUUGAGAGCCUUGUAGUAGU   | 21 | ATHILA   | 0 | 118 | 465  |
| CAACACACACUUCUGAGCCC    | 21 | ATHILA6A | 0 | 118 | 620  |
| UUUAUUCACACAGUGGACUGUG  | 22 | ATHILA2  | 0 | 118 | 310  |
| UCAACGCUCUGAUACAUCUAG   | 21 | ATHILA6A | 0 | 118 | 1855 |
| UUCCCGGGACUCGAAUGACGA   | 21 | ATHILA2  | 0 | 117 | 369  |
| UGAGGUCGAGUAGAGCAAUCUA  | 22 | ATHILA2  | 0 | 117 | 1842 |
| UGCAAUCAGAAUCGGUGUCAC   | 21 | ATHILA6A | 0 | 116 | 116  |
| UAUUGAUUUUUGGCCUGAGGU   | 21 | ATHILA2  | 0 | 116 | 116  |
| AGCACCGCUCUGAUGAUACUC   | 21 | ATHILA6A | 1 | 116 | 107  |
| UCUCAUGUAGUUCUAGUUCACA  | 22 | ATHILA2  | 0 | 115 | 115  |
| UUUAAAACCGAGGACUUUUGC   | 21 | ATHILA2  | 0 | 115 | 903  |
| CUUAACUCUACCCUUUGCACU   | 21 | ATHILA6A | 0 | 115 | 1802 |
| UGGGCGCUUAUACUUUGGGUU   | 21 | ATHILA2  | 0 | 115 | 115  |
| UGUGACACCGAUUCUGAUGC    | 21 | ATHILA2  | 0 | 115 | 901  |
| UCCAUGGAGGAUUCGCCACUG   | 21 | ATHILA6A | 1 | 114 | 138  |
| UUUGCCUGUUAACUCGAGUA    | 21 | ATHILA6B | 1 | 114 | 179  |
| UGAGUAGAAUUCGAUCAUUC    | 21 | ATHILA2  | 0 | 114 | 114  |
| UGUGACACCGAUUCUGAUUUC   | 21 | ATHILA6A | 0 | 114 | 895  |
| UAGUAACGGAUCACAGGGCUUC  | 22 | ATHILA6A | 0 | 113 | 891  |
| CUGGAGGACGUACAGCACUUA   | 21 | ATHILA6A | 0 | 113 | 1778 |
| UCCCGGAAUGCUGAAGAAGUA   | 21 | ATHILA   | 0 | 113 | 296  |
| IACUCCAGAAACUCACAACGA   | 21 | ATHILA6A | 0 | 113 | 113  |
| AUGAGGAUUGUUGACAGCCU    | 21 | ATHILA6B | 0 | 113 | 1771 |

|                           |              |     |        |      |
|---------------------------|--------------|-----|--------|------|
| UUUGAUCCGAGGAUGAUUGAUU    | 22 ATHILA6A  | 0   | 112    | 1767 |
| UGUGGUGUACCUUCACGUCU      | 21 ATHILA6A  | 0   | 112    | 1763 |
| UGCCUGUAGACUCCUGGAGU      | 21 ATHILA2   | 3   | 112    | 34   |
| UUCCGCAGGGAGAGCGUCCUC     | 21 ATHILA6A  | 0   | 112    | 876  |
| UGAGCCGACAAGAGUAGUAUC     | 21 ATHILA    | 0   | 111    | 872  |
| AACAAAACUGUUGAACAGCCU     | 22 ATHILA6A  | 8   | 111    | 13   |
| UACGGUGCCUGUAGAUUCGCU     | 21 ATHILA6A  | 0   | 111    | 1741 |
| UGUGGAUACAAGAGUUGGGCU     | 21 ATHILA2   | 0   | 111    | 1739 |
| UGUGGUCGAGUAGAGCAAUCU     | 21 ATHILA6A  | 0   | 111    | 869  |
| UUCUGAUUGCAUGUGGUGUACC    | 22 ATHILA6A  | 1   | 110    | 158  |
| UUGACCUUGGUUGUAUGGAAC     | 21 ATHILA6A  | 0   | 110    | 289  |
| CUCACAAGUGAUUAGGGCUUG     | 22 ATHILA6A  | 0   | 110    | 1724 |
| CCUCCUUGUUCUGUAUCAGCU     | 21 ATHILA2   | 0   | 110    | 573  |
| UGGAGAUGAUAGAUUAUGGCU     | 22 ATHILA2   | 3   | 109    | 32   |
| UUCCAAGCUCUUGAUAGAUAG     | 21 ATHILA6A  | 0   | 109    | 1713 |
| UCUGAUUGCAUGUGGUGUACC     | 21 ATHILA6A  | 0   | 109    | 109  |
| UGACCGAAGCUCACAGAGAUUG    | 21 ATHILA6A  | 0   | 108    | 108  |
| UGCCUGUAGAUUCCUGGGGU      | 21 ATHILA6A  | 0   | 108    | 340  |
| AUUGUGUAUAAUUUGAGCCU      | 21 ATHILA2   | 0   | 108    | 1694 |
| UAGAUAAACAAGAACUCUUUCU    | 21 ATHILA2   | 0   | 107    | 337  |
| UGACGGUUCAGAUUCAGGAGC     | 21 ATHILA5   | 0   | 107    | 107  |
| UUUUUCGGACUAGAUAGGACU     | 21 ATHILA2   | 0   | 107    | 1677 |
| UCCUGAGGACGCUCUCCCUUGC    | 21 ATHILA6A  | 0   | 106    | 106  |
| UGUGUAUGCAUAAUUGGGAC      | 21 ATHILA6A  | 0   | 106    | 1671 |
| UUGAGAUAUCCCGUGUACUG      | 21 ATHILA2   | 0   | 106    | 1669 |
| UCUAUAGCCAAUGUACUCUACU    | 22 ATHILA2   | 1   | 106    | 76   |
| UCUGUAGAGUGGCUAAACCUUG    | 21 ATHILA2   | 0   | 106    | 416  |
| UCUUCGACUGAGGUAAGCGCC     | 21 ATHILA2   | 0   | 106    | 333  |
| UCACUCGACCACAACAGGCUUG    | 21 ATHILA6B  | 2   | 106    | 69   |
| UUGAAGGAUUUGUGGUUAAACCA   | 22 ATHILA6A  | 1   | 106    | 87   |
| UGUGGUGUACCUUACGUCU       | 21 ATHILA6A  | 0   | 106    | 1658 |
| UAGAGUGGCUAAACCUGAACCU    | 22 ATHILA2   | 6   | 105    | 19   |
| UUUUGAUUCACCGGAUAAACUC    | 22 ATHILA6A  | 1   | 104    | 182  |
| UUAGACCUUGCAGAGUUUGAGCGCC | 22 ATHILA6A  | 10  | 104    | 10   |
| UUGGUCACACAGUGGACUGUG     | 21 ATHILA6A  | 0   | 104    | 545  |
| UCAUCUGCAGUAAGUCCCUUGA    | 21 ATHILA6A  | 0   | 104    | 104  |
| UCCCUUGGGGUACAGAACAUUC    | 21 ATHILA6A  | 0   | 104    | 544  |
| UCAGUAGAAUUCGAUCAUAUC     | 21 ATHILA2   | 0   | 104    | 1626 |
| CGGAGGAACUUGAGCAGCGCC     | 21 ATHILA    | 0   | 103    | 271  |
| CUUGUGAGUGUUUGUGAGGUC     | 21 ATHILA6A  | 0   | 103    | 103  |
| UCAUCAUUGAACUCAUUUGGCU    | 22 ATHILA6A  | 0   | 103    | 270  |
| UGAGAAGAGAUAGAAUAGAAUC    | 22 ATHILA4   | 85  | 103    | 1    |
| UAGGCAGCUCUCGAUCAUGGC     | 21 ATHILA6A  | 0   | 103    | 1615 |
| UUCUUCGGACUGGAUAGGACU     | 21 ATHILA6A  | 0   | 102    | 804  |
| CUCAUGUAGUUCUAGUUCGCA     | 21 ATHILA2   | 0   | 102    | 102  |
| UCAAGCGAUUGGAAGGAUUGUU    | 22 ATHILA2   | 0   | 102    | 532  |
| UACAGGAAGUGGGCGCACACC     | 21 ATHILA6A  | 0   | 102    | 1595 |
| UUGAACAAAGCCUGAUAGAUU     | 21 ATHILA6A  | 0   | 102    | 399  |
| UCAUAUGGACUUUGGCUACACC    | 22 ATREP18   | 48  | 101    | 2    |
| UGAGAUUGCUAGAGGAAAGAG     | 21 ATHILA6A  | 0   | 101    | 796  |
| UUCGGACUGGAUAGGACUAGG     | 21 ATHILA6A  | 0   | 101    | 101  |
| UUGCAGAGAUGGAUGUACAAC     | 21 ATENSPM2  | 4   | 101    | 27   |
| UACGGGUAAAGACAUCAGCGUCU   | 22 ATHILA6A  | 1   | 101    | 113  |
| UAUCCUGAGAGCGGUGCUGGCC    | 22 ATHILA2   | 0   | 101    | 316  |
| UCCCCAGAAUGCUUCAGAUUC     | 21 ATHILA6A  | 0   | 101    | 791  |
| UUGAGGGCCAUUGCGAUCAUC     | 21 ATHILA2   | 0   | 101    | 1580 |
| CUUUCCGUUGGUGUGCGCCCA     | 21 ATHILA6A  | 0   | 100    | 100  |
| GCAAGUGAUGAUAAAAAGACA     | 21 ATENSPM10 | 17  | 100    | 6    |
| UCGAGCACCUACGUCACUGCG     | 21 ATHILA2   | 0   | 100    | 1574 |
| UAACCGGGGCAUGAGAGACUC     | 21 ATHILA2   | 0   | 100    | 1572 |
| UACCGCUGUUCAUUCACUGAG     | 21 ATHILA2   | 1   | 100    | 75   |
| Total                     |              | 809 | 184767 |      |
| Average                   |              | 2   | 423    | 981  |

Supplemental Table 2

## Genes predicted to be targeted by 21-22nt TE siRNAs that accumulate to over 100 RPM in Col AGO1-IP

| Gene ID   | siRNA sequence         | siRNA RPM in wt Col AGO1-IP | E value | Type of Inhibition | Description of target                                                                                                                                                                                                                             |
|-----------|------------------------|-----------------------------|---------|--------------------|---------------------------------------------------------------------------------------------------------------------------------------------------------------------------------------------------------------------------------------------------|
| AT1G01500 | UUUGAAGAGAUAGAAUAGAA   | 242                         | 2.5     | Cleavage           | Symbols:   Erythronate-4-phosphate dehydrogenase family protein   chr1:185133-186923 FORWARD LENGTH=1461                                                                                                                                          |
| AT1G03550 | UUUGGGAGUAGCCAUUAGCCU  | 166                         | 3.5     | Translation        | Symbols:   Secretory carrier membrane protein (SCAMP) family protein   chr1:885623-887956 REVERSE LENGTH=1258                                                                                                                                     |
| AT1G04110 | UGAGCUGUGAUGAAAUGGCU   | 147                         | 4       | Cleavage           | Symbols:   SD01   Subtilase family protein   chr1:1061457-1063784 REVERSE LENGTH=2328                                                                                                                                                             |
| AT1G06770 | UAUGGAAGAAAUGUGUAUUAU  | 314                         | 3       | Cleavage           | Symbols:   DRIP1   DREB2A-interacting protein 1   chr1:2078911-2081939 REVERSE LENGTH=2204                                                                                                                                                        |
| AT1G06840 | UAUGGAGAAAUGUGUAUUAU   | 314                         | 4.5     | Cleavage           | Symbols:   Leucine-rich repeat protein kinase family protein   chr1:2097747-2103479 REVERSE LENGTH=3240                                                                                                                                           |
| AT1G14820 | UGAGCUGUGAUGAAAUGGCU   | 147                         | 4       | Cleavage           | Symbols:   Sec14p-like phosphatidylinositol transfer family protein   chr1:5105018-5106861 REVERSE LENGTH=1346                                                                                                                                    |
| AT1G30210 | UUUGGACUGAAGGGAGCUCCU  | 228                         | 3.5     | Cleavage           | Symbols:   TCP24   TEOSINTE BRANCHED 1, cycloidea, and PCF family 24   chr1:10627185-10630610 REVERSE LENGTH=1553                                                                                                                                 |
| AT1G32380 | UUUGAAGAGAAUAGAAUAGAA  | 242                         | 3       | Translation        | Symbols:   PRS2   phosphoribosyl pyrophosphate (PRPP) synthase 2   chr1:11681752-11684478 FORWARD LENGTH=1733                                                                                                                                     |
| AT1G36060 | UAUGGAGAAAUGUGUAUUAU   | 314                         | 4       | Cleavage           | Symbols:   Integrase-type DNA-binding superfamily protein   chr1:13454496-13456331 REVERSE LENGTH=1836                                                                                                                                            |
| AT1G53230 | UUUGGACUGAAGGGAGCUCCU  | 228                         | 4.5     | Cleavage           | Symbols:   TCP3   TEOSINTE BRANCHED 1, cycloidea and PCF transcription factor 3   chr1:19849788-19851725 REVERSE LENGTH=1844                                                                                                                      |
| AT1G53770 | UAUGGAGAAAUGUGUAUUAU   | 314                         | 4       | Cleavage           | Symbols:   O-fucosyltransferase family protein   chr1:20071311-20073758 REVERSE LENGTH=2005                                                                                                                                                       |
| AT1G54710 | UAUGGAGAAAUGUGUAUUAU   | 314                         | 2       | Cleavage           | Symbols:   ATATG18H, ATG18H   homolog of yeast autophagy 18 (ATG18) H   chr1:20416770-20421035 REVERSE LENGTH=3335                                                                                                                                |
| AT1G67855 | UUUGGGAGUAGCCAUUAGCCU  | 166                         | 4       | Cleavage           | Symbols:   unknown protein; Has 30201 Blast hits to 17322 proteins in 780 species: Archae - 12; Bacteria - 1396; Metazoa - 17338; Fungi - 3422; Plants - 5037; Viruses - 0; Other Eukaryotes - 2996 (source: NCBI BLink).   chr1:25442256-2544287 |
| AT2G23760 | UAUGGAGAAAUGUGUAUUAU   | 314                         | 3       | Translation        | Symbols:   BLH4, SAW2   BEL1-like homeodomain 4   chr2:10107709-10113213 REVERSE LENGTH=2386                                                                                                                                                      |
| AT2G26610 | UGAGCUGUGAUGAAAUGGCU   | 147                         | 4       | Cleavage           | Symbols:   Transducin family protein / WD-40 repeat family protein   chr2:11318771-11324174 FORWARD LENGTH=3750                                                                                                                                   |
| AT2G26950 | UUUGGACUGAAGGGAGCUCCU  | 228                         | 2       | Cleavage           | Symbols:   ATM MYB104, MYB104   myb domain protein 104   chr2:11500721-11502136 REVERSE LENGTH=1212                                                                                                                                               |
| AT2G28620 | UAUGGAGAAAUGUGUAUUAU   | 314                         | 3.5     | Cleavage           | Symbols:   P-loop containing nucleoside triphosphate hydrolases superfamily protein   chr2:12265167-12270020 REVERSE LENGTH=3129                                                                                                                  |
| AT2G29570 | UUUGGACUGAAGGGAGCUCCU  | 228                         | 3       | Cleavage           | Symbols:   PCNA2, ATPCNA2   proliferating cell nuclear antigen 2   chr2:12649906-12651703 REVERSE LENGTH=1133                                                                                                                                     |
| AT2G31070 | UUUGGACUGAAGGGAGCUCCU  | 228                         | 3.5     | Cleavage           | Symbols:   TCP10   TCP domain protein 10   chr2:13220478-13222609 REVERSE LENGTH=2017                                                                                                                                                             |
| AT2G33350 | UUUGGAGAAAUGUGUAUUAU   | 314                         | 3       | Cleavage           | Symbols:   CCT motif family protein   chr2:14133529-14137154 FORWARD LENGTH=1738                                                                                                                                                                  |
| AT2G34430 | UGAGCUGUGAUGAAAUGGCU   | 147                         | 3       | Cleavage           | Symbols:   LH1B1, LHCB1.4   light-harvesting chlorophyll-protein complex II subunit B1   chr2:14524756-14525763 FORWARD LENGTH=1008                                                                                                               |
| AT2G35210 | UUUGAAGAGAAUAGAAUAGAA  | 242                         | 3.5     | Cleavage           | Symbols:   RPA, AGD10, MEE28   root and pollen arfgap   chr2:14836062-14838149 FORWARD LENGTH=1535                                                                                                                                                |
| AT2G02230 | UUUGAAGAGAAUAGAAUAGAA  | 242                         | 2.5     | Cleavage           | Symbols:   RGP1, ATRGPI   reversibly glycosylated polypeptide 1   chr3:41539341-415747 FORWARD LENGTH=1387                                                                                                                                        |
| AT3G04610 | UGAGCUGUGAUGAAAUGGCU   | 147                         | 4       | Cleavage           | Symbols:   FLK   RNA-binding KH domain-containing protein   chr3:1250553-1254873 REVERSE LENGTH=2058                                                                                                                                              |
| AT3G06510 | UUUGAAGAGAAUAGAAUAGAA  | 242                         | 2.5     | Cleavage           | Symbols:   SFR2, ATSRF2   Glycosyl hydrolase superfamily protein   chr3:2016330-2019778 FORWARD LENGTH=2234                                                                                                                                       |
| AT3G06530 | UGAGCUGUGAUGAAAUGGCU   | 147                         | 3.5     | Cleavage           | Symbols:   ARM repeat superfamily protein   chr3:2022596-2033791 FORWARD LENGTH=6748                                                                                                                                                              |
| AT3G09790 | UUUGAAGAGAAUAGAAUAGAA  | 242                         | 2.5     | Cleavage           | Symbols:   UBQ8   ubiquitin 8   chr3:3003862-3006192 REVERSE LENGTH=2331                                                                                                                                                                          |
| AT3G14870 | UAUGGAGAAAUGUGUAUUAU   | 314                         | 3.5     | Cleavage           | Symbols:   Plant protein of unknown function (DUF641)   chr3:5002367-5005739 FORWARD LENGTH=1854                                                                                                                                                  |
| AT3G15030 | UUUGGACUGAAGGGAGCUCCU  | 228                         | 3.5     | Cleavage           | Symbols:   TCP4   TCP family transcription factor 4   chr3:5061681-5064115 FORWARD LENGTH=2033                                                                                                                                                    |
| AT3G17185 | UUUGAAGAGAAUAGAAUAGAA  | 242                         | 0       | Cleavage           | Symbols:   TASIR-ARF, TAS3, ATTAS3   TAS3/TASIR-ARF (TRANS-ACTING SIRNA3); other RNA   chr3:5861491-5862437 FORWARD LENGTH=947                                                                                                                    |
| AT3G24130 | UGAGCUGUGAUGAAAUGGCU   | 147                         | 3.5     | Translation        | Symbols:   Pectin lyase-like superfamily protein   chr3:8711663-8713424 REVERSE LENGTH=1071                                                                                                                                                       |
| AT3G42630 | UAUGGAGAAAUGUGUAUUAU   | 314                         | 3.5     | Cleavage           | Symbols:   Pentatricopeptide repeat (PPR) superfamily protein   chr3:14722250-14723857 FORWARD LENGTH=1534                                                                                                                                        |
| AT3G47400 | UGAGCUGUGAUGAAAUGGCU   | 147                         | 3       | Translation        | Symbols:   Plant invertase/pectin methyltransferase inhibitor superfamily   chr3:17465590-17468118 FORWARD LENGTH=2054                                                                                                                            |
| AT3G47580 | UUUGGGAGUAGCCAUUAGCCU  | 166                         | 4       | Cleavage           | Symbols:   Leucine-rich repeat protein kinase family protein   chr3:17532648-17536059 FORWARD LENGTH=3324                                                                                                                                         |
| AT3G48770 | UGAGCUGUGAUGAAAUGGCU   | 147                         | 5       | Cleavage           | Symbols:   DNA binding:ATP binding   chr3:18078474-18086817 REVERSE LENGTH=6125                                                                                                                                                                   |
| AT3G56620 | UUUGAAGAGAAUAGAAUAGAA  | 242                         | 3       | Translation        | Symbols:   nodulin MHN21 / Eam-like transporter family protein   chr3:20972593-20974611 REVERSE LENGTH=1443                                                                                                                                       |
| AT3G60460 | UUUGGACUGAAGGGAGCUCCU  | 228                         | 3       | Cleavage           | Symbols:   DUO1   myb-like HT1 transcriptional regulator family protein   chr3:22342429-22343491 REVERSE LENGTH=894                                                                                                                               |
| AT3G66170 | UUUGGACUGAAGGGAGCUCCU  | 228                         | 3       | Translation        | Symbols:   SDG14, ATX3   SET domain protein 14   chr3:22850837-22856972 REVERSE LENGTH=3669                                                                                                                                                       |
| AT3G66390 | UUUGGGAGUAGCCAUUAGCCU  | 166                         | 5       | Cleavage           | Symbols:   unknown protein; Has 30201 Blast hits to 17322 proteins in 780 species: Archae - 12; Bacteria - 1396; Metazoa - 17338; Fungi - 3422; Plants - 5037; Viruses - 0; Other Eukaryotes - 2996 (source: NCBI BLink).   chr3:23411166-2341196 |
| AT3G66658 | UUUGGACUGAAGGGAGCUCCU  | 228                         | 3.5     | Cleavage           | Symbols:   ALDH2A21   aldehyde dehydrogenase 22A1   chr3:2095105-2099137 REVERSE LENGTH=2155                                                                                                                                                      |
| AT4G02050 | UGAGCUGUGAUGAAAUGGCU   | 147                         | 3       | Cleavage           | Symbols:   STP7   sugar transporter protein 7   chr4:898307-900870 REVERSE LENGTH=1819                                                                                                                                                            |
| AT4G05420 | UUUGAAGAGAAUAGAAUAGAA  | 242                         | 2.5     | Cleavage           | Symbols:   DDB1A   damaged DNA binding protein 1A   chr4:2746121-2752943 FORWARD LENGTH=3714                                                                                                                                                      |
| AT4G15080 | UUUGAAGAGAAUAGAAUAGAA  | 242                         | 4.5     | Cleavage           | Symbols:   DHHC-type zinc finger family protein   chr4:8608700-8612693 REVERSE LENGTH=2893                                                                                                                                                        |
| AT4G18390 | UUUGGACUGAAGGGAGCUCCU  | 228                         | 3.5     | Cleavage           | Symbols:   TCP2   TEOSINTE BRANCHED 1, cycloidea and PCF transcription factor 2   chr4:10162979-10165546 REVERSE LENGTH=1569                                                                                                                      |
| AT4G29658 | UUUGGGAGUAGCCAUUAGCCU  | 166                         | 4       | Cleavage           | Symbols:   PRA1.C   prenylated RAB acceptor 1.C   chr4:14533447-14533830 REVERSE LENGTH=384                                                                                                                                                       |
| AT4G30000 | UGAGCUGUGAUGAAAUGGCU   | 147                         | 3       | Cleavage           | Symbols:   Dihydropterin pyrophosphokinase / Dihydropterolate synthase   chr4:14670156-14672463 REVERSE LENGTH=2013                                                                                                                               |
| AT4G32830 | UUUGGGAGUAGCCAUUAGCCU  | 166                         | 5       | Cleavage           | Symbols:   AUAU1, AUR1   ataurora1   chr4:15842453-15844536 FORWARD LENGTH=1171                                                                                                                                                                   |
| AT4G36710 | UGAGCUGUGAUGAAAUGGCU   | 147                         | 4       | Cleavage           | Symbols:   GRAS family transcription factor   chr4:17305758-17307643 FORWARD LENGTH=1886                                                                                                                                                          |
| AT5G06100 | UUUGGACUGAAGGGAGCUCCU  | 228                         | 2.5     | Cleavage           | Symbols:   MYB33, ATMYB33   myb domain protein 33   chr5:1837914-1839997 FORWARD LENGTH=1579                                                                                                                                                      |
| AT5G07660 | UGAGCUGUGAUGAAAUGGCU   | 147                         | 3.5     | Cleavage           | Symbols:   SMC6A   structural maintenance of chromosomes 6A   chr5:2422839-2429912 FORWARD LENGTH=3177                                                                                                                                            |
| AT5G08110 | UAUGGAGAAAUGUGUAUUAU   | 314                         | 3.5     | Cleavage           | Symbols:   nuclear acid binding:ATP-dependent helicases:ATP binding:helicases:ATP-dependent helicases   chr5:2594722-2600114 REVERSE LENGTH=3558                                                                                                  |
| AT5G18240 | UUUGGGAGUAGCCAUUAGCCU  | 166                         | 4       | Cleavage           | Symbols:   MYR1   myb-related protein 1   chr5:6028285-6030801 REVERSE LENGTH=1665                                                                                                                                                                |
| AT5G26622 | UGAGCUGUGAUGAAAUGGCU   | 147                         | 3.5     | Cleavage           | Symbols:   Beta-galactosidase related protein   chr5:9355980-9357436 REVERSE LENGTH=1457                                                                                                                                                          |
| AT5G28740 | UUUGGGAGUAGCCAUUAGCCU  | 166                         | 3       | Translation        | Symbols:   Tetra-tricopeptide repeat (TPR)-like superfamily protein   chr5:10780647-10783911 FORWARD LENGTH=2923                                                                                                                                  |
| AT5G32460 | UUUGGAGAGUAGCCAUUAGCCU | 166                         | 3.5     | Cleavage           | Symbols:   Transcriptional factor B3 family protein   chr5:12081083-12084148 REVERSE LENGTH=1593                                                                                                                                                  |
| AT5G37160 | UUUGGGAGUAGCCAUUAGCCU  | 166                         | 3.5     | Cleavage           | Symbols:   P-loop containing nucleoside triphosphate hydrolases superfamily protein   chr5:14705426-14708376 FORWARD LENGTH=2616                                                                                                                  |
| AT5G37180 | UGAGCUGUGAUGAAAUGGCU   | 147                         | 3.5     | Cleavage           | Symbols:   SUS5, ATXSU5   sucrose synthase 5   chr5:14718238-14722913 FORWARD LENGTH=2511                                                                                                                                                         |
| AT5G48060 | UGAGCUGUGAUGAAAUGGCU   | 147                         | 4       | Cleavage           | Symbols:   C2 calcium/lipid-binding plant phosphoribosyltransferase family protein   chr5:19475296-19479002 FORWARD LENGTH=3235                                                                                                                   |
| AT5G54250 | UGAGCUGUGAUGAAAUGGCU   | 147                         | 3       | Cleavage           | Symbols:   CNGC4   cyclic nucleotide-gated cation channel 4   chr5:22025475-22030099 REVERSE LENGTH=2296                                                                                                                                          |
| AT5G54290 | UUUGGGAGUAGCCAUUAGCCU  | 166                         | 3.5     | Cleavage           | Symbols:   CcdA   cytochrome c biogenesis protein family   chr5:22051034-22053974 FORWARD LENGTH=1182                                                                                                                                             |
| AT5G56600 | UUUGGGAGUAGCCAUUAGCCU  | 166                         | 4       | Cleavage           | Symbols:   PFN3, PRF3   profilin 3   chr5:22909685-22910821 REVERSE LENGTH=704                                                                                                                                                                    |
| AT5G57490 | UGAGCUGUGAUGAAAUGGCU   | 147                         | 4       | Translation        | Symbols:   VDAC4, ATVDAC4   voltage dependent anion channel 4   chr5:23283680-23285934 REVERSE LENGTH=1301                                                                                                                                        |
| AT5G60610 | UUUGGGAGUAGCCAUUAGCCU  | 166                         | 3       | Cleavage           | Symbols:   F-box/RN1-like superfamily protein   chr5:24363591-2436528 FORWARD LENGTH=1441                                                                                                                                                         |
| AT5G61010 | UUUGGGAGUAGCCAUUAGCCU  | 166                         | 3.5     | Cleavage           | Symbols:   ATEX070E2, EXO70E2   exocyst subunit exo70 family protein E2   chr5:24553841-24556749 FORWARD LENGTH=2805                                                                                                                              |
| AT5G62130 | UUUGAAGAGAAUAGAAUAGAA  | 242                         | 4       | Cleavage           | Symbols:   Per1-like family protein   chr5:24950264-24953232 REVERSE LENGTH=2039                                                                                                                                                                  |

## Genes predicted to be targeted by 21-22 nt TE siRNAs that accumulate to over 100 RPM in ddm1 F6 AGO1-IP

| Gene ID   | siRNA sequence          | siRNA RPM in ddm1 F6 AGO1-IP | E value | Inhibition  | Description of target                                                                                                                                                                                                               |
|-----------|-------------------------|------------------------------|---------|-------------|-------------------------------------------------------------------------------------------------------------------------------------------------------------------------------------------------------------------------------------|
| AT1G01020 | UGUGGAUACAAGAGCUGGCGU   | 215                          | 3.5     | Translation | Symbols:   ARV1   Arv1-like protein   chr1:5928-8737 REVERSE LENGTH=1623                                                                                                                                                            |
| AT1G01030 | UCACUUGUCUGAAGCAUGUACC  | 148                          | 4       | Translation | Symbols:   NGA3   AP2/B3-like transcriptional factor family protein   chr1:11649-13714 REVERSE LENGTH=1905                                                                                                                          |
| AT1G01060 | UGAAUGACAACUUGGACAGGCU  | 283                          | 3       | Translation | Symbols:   LHY, LHY1   Homeodomain-like superfamily protein   chr1:33379-37757 REVERSE LENGTH=2517                                                                                                                                  |
| AT1G01160 | UGUCCCAACUUAACUACUACC   | 579                          | 4       | Translation | Symbols:   GUF2   GRF1-interacting factor 2   chr1:72339-74096 FORWARD LENGTH=1045                                                                                                                                                  |
| AT1G01225 | UAUGCAUAACUUGGGACUUAACC | 333                          | 5       | Cleavage    | Symbols:   NC domain-containing protein-related   chr1:95987-97407 FORWARD LENGTH=1025                                                                                                                                              |
| AT1G01320 | UUCACUCGACAGUAGUCCUGG   | 314                          | 2.5     | Translation | Symbols:   Tetra-tricopeptide repeat (TPR)-like superfamily protein   chr1:121124-130570 REVERSE LENGTH=6015                                                                                                                        |
| AT1G01340 | UUUUUAUUCAAGUAGCUGACU   | 133                          | 4       | Cleavage    | Symbols:   CNGC10   cyclic nucleotide-gated channel 10   chr1:132330-135831 REVERSE LENGTH=2397                                                                                                                                     |
| AT1G01390 | GCAAGUGAUGAUAAAAGACA    | 100                          | 3       | Translation | Symbols:   UDP-Glycosyltransferase superfamily protein   chr1:148120-149806 REVERSE LENGTH=1687                                                                                                                                     |
| AT1G01610 | AUUUGGCGCUCAACUCUGACA   | 204                          | 4.5     | Cleavage    | Symbols:   ATPPAT4, GPAT4   glycerol-3-phosphate acyltransferase 4   chr1:221691-224340 REVERSE LENGTH=1856                                                                                                                         |
| AT1G01880 | UUGGUCACACAGUGGACUGUG   | 104                          | 4       | Cleavage    | Symbols:   5'-3' exonuclease family protein   chr1:306480-309109 REVERSE LENGTH=1993                                                                                                                                                |
| AT1G01910 | UGACGGUUCAGAUUCAGGAGC   | 107                          | 3.5     | Cleavage    | Symbols:   P-loop containing nucleoside triphosphate hydrolases superfamily protein   chr1:313229-315902 REVERSE LENGTH=1374                                                                                                        |
| AT1G02010 | UAGAGUUAGUUGGGACAGGA    | 199                          | 3       | Cleavage    | Symbols:   SEC1A   secretory 1A   chr1:347891-352480 FORWARD LENGTH=2460                                                                                                                                                            |
| AT1G02060 | UUUUUCGGACUAGUAGGACU    | 107                          | 3.5     | Translation | Symbols:   Tetra-tricopeptide repeat (TPR)-like superfamily protein   chr1:360918-363094 REVERSE LENGTH=2177                                                                                                                        |
| AT1G02090 | UAGUGACCCAGUAGUACACC    | 461                          | 4       | Cleavage    | Symbols:   FUS3, CSN7, COPI5, ATCSN7   Proteasome component (PC) domain protein   chr1:387281-389647 REVERSE LENGTH=1655                                                                                                            |
| AT1G02700 | UUUGUUAACUACUGUGACCC    | 165                          | 2.5     | Cleavage    | Symbols:   unknown protein; FUNCTIONS IN: molecular_function unknown; INVOLVED IN: biological_process unknown; LOCATED IN: mitochondrion; BEST Arabidopsis thaliana protein match is: unknown protein (TAIR:ATG04210.1); Has 49 Bla |
| AT1G02720 | UUUGAUCAGUAGCUGACUCCU   | 4031                         | 4       | Cleavage    | Symbols:   GATL5   galacturonoyltransferase 5   chr1:591826-593289 FORWARD LENGTH=1464                                                                                                                                              |
| AT1G02730 | UUCGAGCACUCCUAGACCCGA   | 160                          | 5       | Translation | Symbols:   ATCLSD5, CLSD5, SOS6   cellulose synthase-like D5   chr1:594573-598657 REVERSE LENGTH=3854                                                                                                                               |

|           |                         |      |     |             |                                                                                                                                                                                                                                                          |
|-----------|-------------------------|------|-----|-------------|----------------------------------------------------------------------------------------------------------------------------------------------------------------------------------------------------------------------------------------------------------|
| AT1G02850 | UCGAGGCGAGGAAUAUAGCU    | 334  | 3   | Cleavage    | Symbols: BGLU11   beta glucosidase 11   chr1:630505-633259 FORWARD LENGTH=1651                                                                                                                                                                           |
| AT1G02860 | UCUAUGUCCGAUUUUUUGGAC   | 421  | 3   | Cleavage    | Symbols: NLA   SPX (SYG1/Pho81/XPR1) domain-containing protein   chr1:635144-637262 FORWARD LENGTH=1511                                                                                                                                                  |
| AT1G02890 | UUAGACCCGAGGAGUAUGGACU  | 330  | 3.5 | Cleavage    | Symbols:   AAA-type ATPase family protein   chr1:645092-651907 REVERSE LENGTH=4047                                                                                                                                                                       |
| AT1G02910 | UUGGCGCUCAACUCUGCAAGG   | 4868 | 4.5 | Cleavage    | Symbols: LPA1   tetratricopeptide repeat (TPR)-containing protein   chr1:655577-658148 REVERSE LENGTH=1557                                                                                                                                               |
| AT1G02950 | CCUGAGCUAGUGACCGAGUA    | 270  | 4   | Translation | Symbols: ATGSTF4, GST31, GSTF4   glutathione S-transferase F4   chr1:665168-666451 REVERSE LENGTH=903                                                                                                                                                    |
| AT1G03010 | UUUGAGAGAUCCCUUGUAUCG   | 632  | 3.5 | Cleavage    | Symbols:   Phototropic-responsive NPH3 family protein   chr1:693480-696382 FORWARD LENGTH=2099                                                                                                                                                           |
| AT1G03040 | UUUGAGAGAUCCCUUGUAUCG   | 632  | 3.5 | Cleavage    | Symbols:   basic helix-loop-helix (bHLH) DNA-binding superfamily protein   chr1:703906-706630 REVERSE LENGTH=1440                                                                                                                                        |
| AT1G03060 | USAGGUGUGAGUAGGACAAUUA  | 117  | 4   | Cleavage    | Symbols: SP1   Beige/BSAC1 domain_WD domain, G-beta repeat protein   chr1:712473-726891 REVERSE LENGTH=11304                                                                                                                                             |
| AT1G03070 | UAUCUGGACGCGUGUGUGGCG   | 334  | 5   | Cleavage    | Symbols:   Bas inhibitor-1 family protein   chr1:729935-731557 FORWARD LENGTH=1019                                                                                                                                                                       |
| AT1G03100 | CAAGAACCCTGACCAACUUCG   | 169  | 4.5 | Translation | Symbols:   Pentatricopeptide repeat (PPR) superfamily protein   chr1:743885-746479 REVERSE LENGTH=2595                                                                                                                                                   |
| AT1G03110 | UACGCUAGGAGAGAUUUCGCC   | 122  | 4.5 | Cleavage    | Symbols: TRM82, ATRM82   Transducin/WD40 repeat-like superfamily protein   chr1:749246-751963 FORWARD LENGTH=1564                                                                                                                                        |
| AT1G03190 | UACGAGACUUCUGGCCAGCUU   | 307  | 4.5 | Cleavage    | Symbols: ATXPD, UVH6   RAD3-like DNA-binding helicase protein   chr1:775527-780027 FORWARD LENGTH=2578                                                                                                                                                   |
| AT1G03250 | UUUGAGAGAUCCCUUGUAUCG   | 632  | 4.5 | Cleavage    | Symbols:   unknown protein; Has 89 Blast hits to 89 proteins in 31 species: Archae - 0; Bacteria - 0; Metazoa - 31; Fungi - 0; Plants - 48; Viruses - 0; Other Eukaryotes - 10 (source: NCBI BLink).   chr1:793353-795368 REVERSE LENGTH=1170            |
| AT1G03350 | UGAAGGAUUUGUGGUAACCA    | 474  | 4.5 | Cleavage    | Symbols:   BSD domain-containing protein   chr1:822638-824393 REVERSE LENGTH=1756                                                                                                                                                                        |
| AT1G03365 | UGUGGUGUACUUCUACCGUCU   | 112  | 4.5 | Translation | Symbols:   RING/U-box superfamily protein   chr1:826569-830383 FORWARD LENGTH=2836                                                                                                                                                                       |
| AT1G03380 | UAUGCAUAACUUGGGACUUAAC  | 333  | 3   | Cleavage    | Symbols: ATATG18G, ATG18G   homolog of yeast autophagy 18 (ATG18) G   chr1:835785-840940 FORWARD LENGTH=3732                                                                                                                                             |
| AT1G03445 | CUACUCGGUACUAGGCUACAG   | 311  | 3.5 | Cleavage    | Symbols: BSU1   Serine/threonine protein phosphatase family protein   chr1:854410-859701 REVERSE LENGTH=2727                                                                                                                                             |
| AT1G03457 | UCUGUAUGCAUAUUCUUGGGAC  | 1212 | 3.5 | Translation | Symbols:   RNA-binding (RRM/RBD/RNP motifs) family protein   chr1:860788-864075 REVERSE LENGTH=1694                                                                                                                                                      |
| AT1G03610 | UUUCUCCCGUUGGUGUGCGCC   | 170  | 3.5 | Cleavage    | Symbols:   Protein of unknown function (DUF789)   chr1:900887-903003 FORWARD LENGTH=1675                                                                                                                                                                 |
| AT1G03687 | UUUAUGCUUUGUUGUACCC     | 153  | 3.5 | Cleavage    | Symbols:   DTW domain-containing protein   chr1:918299-920507 FORWARD LENGTH=1356                                                                                                                                                                        |
| AT1G03770 | CUUAACACGACUUCUUGGCC    | 290  | 2.5 | Translation | Symbols: ATRING18, RING18   RING 18   chr1:944595-947482 REVERSE LENGTH=1611                                                                                                                                                                             |
| AT1G03850 | CCUAGUAGCUAGUACUUCUUCU  | 596  | 4   | Translation | Symbols:   Glutaredoxin domain superfamily protein   chr1:977102-977761 REVERSE LENGTH=660                                                                                                                                                               |
| AT1G03900 | UCUGUAGCAAAAUAUUGGAAAC  | 163  | 4   | Translation | Symbols: ATNAPA, NAPA   non-intrinsic ABC protein 4   chr1:991139-993118 FORWARD LENGTH=1198                                                                                                                                                             |
| AT1G04070 | UUUGAGGACUUCUACCGACUAG  | 261  | 4.5 | Translation | Symbols: TON22+, ATOM22+   translocase of outer membrane 22-1   chr1:1050553-1051186 REVERSE LENGTH=634                                                                                                                                                  |
| AT1G04090 | UUGGCAUGGCAAUUUGAACUC   | 1059 | 3.5 | Translation | Symbols:   Protein of unknown function (DUF946)   chr1:1057151-1059419 FORWARD LENGTH=1965                                                                                                                                                               |
| AT1G04120 | UGAGGUGGAGUAGGACAAUUA   | 117  | 3.5 | Cleavage    | Symbols: ATMRP5, MRP5, ATABCC5, ABCS5   multidrug resistance-associated protein 5   chr1:1064454-1070927 REVERSE LENGTH=5277                                                                                                                             |
| AT1G04150 | UCCACCCGACGUAAGCAACU    | 1524 | 3.5 | Cleavage    | Symbols:   C2 calcium/lipid-binding plant phosphoribosyltransferase family protein   chr1:1081208-1084246 REVERSE LENGTH=3039                                                                                                                            |
| AT1G04180 | UCCGCUAGAUUAUAAACUAG    | 281  | 3.5 | Translation | Symbols: YUC9   YUCCA 9   chr1:1104623-1105988 FORWARD LENGTH=1266                                                                                                                                                                                       |
| AT1G04350 | UUGAAAGACUUGUGGUAACACC  | 926  | 4   | Translation | Symbols:   2-oxoglutarate (ZOG) and Fe(lI)-dependent oxygenase superfamily protein   chr1:1165165-1166768 FORWARD LENGTH=1444                                                                                                                            |
| AT1G04530 | CUACUCGGUACUAGGCUACAG   | 311  | 2   | Cleavage    | Symbols: TPR4   Tetratricopeptide repeat (TPR)-like superfamily protein   chr1:1234176-1236034 REVERSE LENGTH=1352                                                                                                                                       |
| AT1G04600 | UCGGCUCAACCUUAGGACUUC   | 129  | 4   | Cleavage    | Symbols: XIA, ATXIA   myosin XI A   chr1:1262123-1272376 FORWARD LENGTH=5193                                                                                                                                                                             |
| AT1G04710 | UUUAUGAGACUAGCCACGAGU   | 149  | 3.5 | Cleavage    | Symbols: KAT1, PKT4   peroxisomal 3-ketoacyl-CoA thiolase 4   chr1:1321904-1324782 FORWARD LENGTH=1595                                                                                                                                                   |
| AT1G04890 | UUGGAGACUCCCGUACCCGA    | 160  | 4   | Translation | Symbols:   Protein of unknown function, DUF593   chr1:1380382-1382599 REVERSE LENGTH=2023                                                                                                                                                                |
| AT1G04920 | UUUAUACCAAGACUUCUGGCC   | 310  | 2.5 | Cleavage    | Symbols: ATPSP3F, SP53F   sucrose phosphate synthase 3F   chr1:1391052-1395864 REVERSE LENGTH=3469                                                                                                                                                       |
| AT1G04950 | UAUGGCUGGGAGCAUAGCGCA   | 299  | 5   | Cleavage    | Symbols: TAFI59, TAF6, ATTAf6   TATA BOX ASSOCIATED FACTOR II 59   chr1:1403085-1407501 REVERSE LENGTH=2110                                                                                                                                              |
| AT1G04985 | UGAGAGAUCCCGUUAUAGCU    | 786  | 4.5 | Translation | Symbols:   unknown protein; Has 37 Blast hits to 37 proteins in 11 species: Archae - 0; Bacteria - 0; Metazoa - 0; Fungi - 0; Plants - 37; Viruses - 0; Other Eukaryotes - 0 (source: NCBI BLink).   chr1:1416343-1418482 REVERSE LENGTH=993             |
| AT1G05020 | UCUGAAUCUACCCGACCCAAA   | 493  | 4   | Cleavage    | Symbols:   ENTH1/ANTH/VHS superfamily protein   chr1:1435254-1437667 REVERSE LENGTH=2414                                                                                                                                                                 |
| AT1G05040 | UAAGCAUUIUGAUUACCCGAGU  | 285  | 3.5 | Cleavage    | Symbols:   BEST Arabidopsis thaliana protein match is: Ubiquitin-associated (UBA) protein (TAIR:AT2G33010.1); Has 14 Blast hits to 12 proteins in 3 species: Archae - 0; Bacteria - 0; Metazoa - 0; Fungi - 0; Plants - 14; Viruses - 0; Other Eukaryote |
| AT1G05055 | UUUACUUCUCCGGUAGGCA     | 461  | 4.5 | Cleavage    | Symbols: ATGF2H2, GTF2H2   general transcription factor II H2   chr1:1448718-1450887 REVERSE LENGTH=1496                                                                                                                                                 |
| AT1G05061 | UUUGAACACCGCUUAGUAAGU   | 102  | 4   | Cleavage    | Symbols:   Pseudogene of AT3G32630, pentatricopeptide (PPR) repeat-containing protein   chr1:1453216-1454260 REVERSE LENGTH=1045                                                                                                                         |
| AT1G05090 | AUUCGAGAACUCCUACGCCCG   | 350  | 3.5 | Cleavage    | Symbols:   dentin sialophosphoprotein-related   chr1:1463202-1465622 FORWARD LENGTH=2121                                                                                                                                                                 |
| AT1G05120 | UGAAGGACAAGCUACACUGCU   | 1483 | 4   | Cleavage    | Symbols:   Helicase protein with RING/U-box domain   chr1:1471406-1476078 REVERSE LENGTH=2731                                                                                                                                                            |
| AT1G05200 | UCUJAUUGGCGUUCUUCAGAC   | 300  | 3   | Translation | Symbols: ATLR3.4, GLR3.4, GLUR3   glutamate receptor 3.4   chr1:1505317-1509152 FORWARD LENGTH=3257                                                                                                                                                      |
| AT1G05300 | UGAGCGAAUUGUUGACAGCCU   | 113  | 4.5 | Cleavage    | Symbols: ZIP5   zinc transporter 5 precursor   chr1:1545216-1547798 REVERSE LENGTH=1838                                                                                                                                                                  |
| AT1G05360 | UUUGAGUGUUGUUGAGGUGU    | 141  | 3   | Translation | Symbols:   BEST Arabidopsis thaliana protein match is: SNARE associated Golgi protein family (TAIR:AT4G14950.1); Has 332 Blast hits to 326 proteins in 115 species: Archae - 0; Bacteria - 11; Metazoa - 174; Fungi - 0; Plants - 74; Viruses - 0; Othe  |
| AT1G05400 | CUUCGAGGAGUAUAGCAGCCGC  | 513  | 3.5 | Cleavage    | Symbols:   unknown protein; INVOLVED IN: biological_process unknown; LOCATED IN: cellular_component unknown; EXPRESSED IN: sperm cell; BEST Arabidopsis thaliana protein match is: unknown protein (TAIR:AT1G06081.1); Has 31 Blast hit                  |
| AT1G05570 | UUACCCGACGCGGUUUAUUA    | 130  | 4.5 | Cleavage    | Symbols: CALS1, GSL06, ATGSL6, ATGSL6, GSL6   callose synthase 1   chr1:1647706-1659437 REVERSE LENGTH=6231                                                                                                                                              |
| AT1G05640 | UUCGAGAACUAUAGGAAGUACA  | 448  | 4   | Cleavage    | Symbols:   Ankryrin repeat family protein   chr1:1687436-1689501 REVERSE LENGTH=1884                                                                                                                                                                     |
| AT1G05670 | AUUUCAGUGAGGACUAGUCCU   | 200  | 4.5 | Cleavage    | Symbols:   Pentatricopeptide repeat (PPR-like) superfamily protein   chr1:1697587-1701025 REVERSE LENGTH=3227                                                                                                                                            |
| AT1G05690 | UGUGGAUAACAAGAUUGGGCU   | 111  | 4   | Cleavage    | Symbols: BT3   BTB and TAZ domain protein 3   chr1:1707011-1709347 FORWARD LENGTH=1660                                                                                                                                                                   |
| AT1G05920 | UCACUCGCAUUCUUAAGAAU    | 146  | 3   | Translation | Symbols:   Domain of unknown function (DUF313)   chr1:1796778-1798254 FORWARD LENGTH=1477                                                                                                                                                                |
| AT1G05960 | UGACACGAAUUCUUAUAGCUU   | 823  | 3   | Cleavage    | Symbols:   ARM repeat superfamily protein   chr1:1807973-1815474 REVERSE LENGTH=3631                                                                                                                                                                     |
| AT1G06060 | UUUCUUCUCCGUGUGUGUGCGCC | 205  | 4   | Cleavage    | Symbols:   Lish and RanBPm domains containing protein   chr1:1832943-1834861 FORWARD LENGTH=1115                                                                                                                                                         |
| AT1G06070 | UUUGUUGUAGUCCUUGCCUCCU  | 669  | 4   | Cleavage    | Symbols:   Basic-leucine zipper (bZIP) transcription factor family protein   chr1:1834829-1837648 REVERSE LENGTH=1893                                                                                                                                    |
| AT1G06225 | UUGUAGAUUGGGGACUUAUUA   | 102  | 4   | Cleavage    | Symbols: CLS3   CLAVATA3/ESR-RELATED 3   chr1:1906575-1906226 FORWARD LENGTH=252                                                                                                                                                                         |
| AT1G06370 | UGACGCGCAUUCUUAAGAUUG   | 154  | 3.5 | Cleavage    | Symbols:   pseudogene, similar to putative glycolipid alpha-mannosyltransferase, blastp match of 41% identity and 9.6e-10 P-value to GP13161358[ob]   BA832949.1   [AP002908 putative glycolipid alpha-mannosyltransferase (Oryza sativa [jap            |
| AT1G06580 | UUCAUUGUCCCGCGUAGGCA    | 461  | 3   | Cleavage    | Symbols:   Pentatricopeptide repeat (PPR) superfamily protein   chr1:2014003-2016054 REVERSE LENGTH=2052                                                                                                                                                 |
| AT1G06670 | UCAUUAUGGACUUIUGGCUAACC | 101  | 3   | Cleavage    | Symbols: NIH   nuclear DEIH-boxhelicase   chr1:2040433-2047612 FORWARD LENGTH=5144                                                                                                                                                                       |
| AT1G06730 | UGUCACGAUUGAUUUUUCUUCU  | 123  | 4   | Cleavage    | Symbols:   pfkB-like carbohydrate kinase family protein   chr1:2067529-2070446 FORWARD LENGTH=1968                                                                                                                                                       |
| AT1G06800 | UCACUCGCAUUCUUAAGAAU    | 146  | 4   | Translation | Symbols: PLA-[gamma]1   alpha/beta-Hydrolases superfamily protein   chr1:2090041-2091686 REVERSE LENGTH=1646                                                                                                                                             |
| AT1G07050 | UGACGGUUCAGAUUAGCAGGAC  | 107  | 4.5 | Cleavage    | Symbols:   CCT motif family protein   chr1:2164188-2165239 REVERSE LENGTH=833                                                                                                                                                                            |
| AT1G07150 | UGUAUGCAUAUUGGGGACUUG   | 149  | 4   | Cleavage    | Symbols: MAPKKK13   mitogen-activated protein kinase kinase kinase 13   chr1:2193941-2195798 REVERSE LENGTH=1586                                                                                                                                         |
| AT1G07450 | UGAGAGAUCCCUUGUAUCUGA   | 786  | 4.5 | Cleavage    | Symbols:   NAD(P)-binding Rossmann-fold superfamily protein   chr1:2287926-2289336 REVERSE LENGTH=975                                                                                                                                                    |
| AT1G07570 | UGAGAAUAUUGCAUUCAGACU   | 158  | 4   | Cleavage    | Symbols: APK1A, APK1   Protein kinase superfamily protein   chr1:2331226-2336333 REVERSE LENGTH=1576                                                                                                                                                     |
| AT1G07590 | UUGGAGGUCUCUUAUAGAGA    | 437  | 4   | Cleavage    | Symbols:   Tetratricopeptide repeat (TPR)-like superfamily protein   chr1:2336523-2339391 REVERSE LENGTH=2361                                                                                                                                            |
| AT1G07670 | CUACAAAUUGGAGACUCCCU    | 156  | 3.5 | Translation | Symbols: ATECA4, ECA4   endomembrane-type CA-ATPase 4   chr1:2370052-2374545 REVERSE LENGTH=3538                                                                                                                                                         |
| AT1G07705 | UGACACGAAUUCUUAUAGUUCU  | 377  | 4   | Cleavage    | Symbols:   NOT2 / NOT3 / NOT5 family   chr1:2381615-2386092 FORWARD LENGTH=2316                                                                                                                                                                          |
| AT1G07725 | UGACACGAAUUCUUAUAGUUCU  | 823  | 4.5 | Cleavage    | Symbols: ATEX070H6, EXO70H6   exocyst subunit exo70 family protein H6   chr1:2394801-2397272 REVERSE LENGTH=2472                                                                                                                                         |
| AT1G07810 | CUACAAAUUGGAGACUCCCU    | 156  | 3.5 | Translation | Symbols: ECA1, ATECA1, ACA3   ER-type Ca2+-ATPase 1   chr1:2416265-2420757 FORWARD LENGTH=3499                                                                                                                                                           |
| AT1G07850 | UAAGCGUAGGACGACUUAUUGA  | 134  | 3   | Cleavage    | Symbols: MED22B   Surfeit locus protein 5 subunit 22 of mediator complex   chr1:2465770-2467022 REVERSE LENGTH=796                                                                                                                                       |
| AT1G07960 | UGUGACACGCUUUCUUAUAGG   | 115  | 3   | Cleavage    | Symbols: ATPDIL5.1, PDIL5.1   PDIL-like 5.1   chr1:2467161-2469139 FORWARD LENGTH=949                                                                                                                                                                    |
| AT1G08040 | UACACUCACUUGUUAUAGGAG   | 223  | 2.5 | Cleavage    | Symbols:   Protein of unknown function (DUF707)   chr1:2495342-2498641 REVERSE LENGTH=1501                                                                                                                                                               |
| AT1G08050 | UGAAUAAAACUGAAGCAAGCC   | 263  | 4   | Cleavage    | Symbols:   Zinc finger (C3HC4-type RING finger) family protein   chr1:2498836-2501427 REVERSE LENGTH=2294                                                                                                                                                |
| AT1G08065 | AUACCAAAACCUAUAUUCU     | 127  | 4   | Cleavage    | Symbols: ATACAS, ACAS   alpha carbonic anhydrase 5   chr1:2511647-2513454 REVERSE LENGTH=1088                                                                                                                                                            |
| AT1G08110 | UUUCUUGUAGCAGGAGUUAUUCU | 302  | 4.5 | Translation | Symbols:   lactoylglutathione lyase family protein / glyoxalase I family protein   chr1:2535328-2537931 FORWARD LENGTH=944                                                                                                                               |
| AT1G08250 | UCCUGAGUACUUCUUGUCCAA   | 209  | 3   | Translation | Symbols: ADT6   argonate dehydratase 6   chr1:2588857-2590301 REVERSE LENGTH=1445                                                                                                                                                                        |
| AT1G08260 | UCGAGGCGAGGAAUAUAGCU    | 334  | 3.5 | Translation | Symbols: EMB142, EMB2284, POL2A, TIL1, EMB529, ABO4, ESD7   DNA polymerase epsilon catalytic subunit   chr1:2590944-2606892 FORWARD LENGTH=6486                                                                                                          |
| AT1G08340 | UGAGGUGUAGGAGAACCAUUA   | 117  | 4   | Cleavage    | Symbols:   Rho GTPase activating protein with PAK-box/P21-Rho-binding domain   chr1:2631068-2632871 FORWARD LENGTH=1438                                                                                                                                  |
| AT1G08350 | UUUGGCGUGAGGUGUAGCACC   | 133  | 4   | Cleavage    | Symbols:   Endomembrane protein 70 protein family   chr1:2632810-2635852 REVERSE LENGTH=2013                                                                                                                                                             |
| AT1G08380 | UCGGCUCAAAACCUAACACGU   | 129  | 4   | Translation | Symbols: PSAO   photosystem I subunit O   chr1:2640813-2641828 REVERSE LENGTH=703                                                                                                                                                                        |
| AT1G08450 | UUUGUAUGCAUAUUCUUGGGAC  | 135  | 2.5 | Translation | Symbols: CRT3, PSLL, EBS2, ALCRT3   calreticulin 3   chr1:2667839-2671825 REVERSE LENGTH=1307                                                                                                                                                            |
| AT1G08500 | UGAAGGAUUUGUGGUUAACCA   | 474  | 3   | Cleavage    | Symbols: ENODL18, AENODL18   early nodulin-like protein 18   chr1:2689016-2690045 FORWARD LENGTH=945                                                                                                                                                     |
| AT1G08520 | UCUAUAGCAUUAUUGCUUAUCU  | 106  | 4   | Cleavage    | Symbols: ALB1, ALB-1V, V157, PDE166, CHLD   ALBINA 1   chr1:2696412-2700959 FORWARD LENGTH=2549                                                                                                                                                          |
| AT1G08620 | AAACACUUAUAGACUUGAUUCU  | 123  | 4.5 | Cleavage    | Symbols: PKDM70   Transcription factor jumoni (jmi) family protein / zinc finger (CSH2 type) family protein   chr1:2736774-2743758 FORWARD LENGTH=4181                                                                                                   |
| AT1G08830 | UACCGGAGGAGGUAUAGUACU   | 401  | 4.5 | Translation | Symbols: CSD1   copper/zinc superoxide dismutase 1   chr1:2827118-2829315 FORWARD LENGTH=806                                                                                                                                                             |
| AT1G08890 | AUAGCGAAUUGUUAUAGCAGCCU | 114  | 5   | Cleavage    | Symbols:   Major facilitator superfamily protein   chr1:2848348-2852270 FORWARD LENGTH=1675                                                                                                                                                              |
| AT1G08940 | UUUCUUGAUAUUCUUCUCCCU   | 1649 | 4.5 | Cleavage    | Symbols:   Phosphoglycerate mutase family protein   chr1:2877692-2879169 FORWARD LENGTH=913                                                                                                                                                              |
| AT1G08970 | UUUCUAGACUUGGAUAGACU    | 265  | 3.5 | Translation | Symbols: HAP5C, NF-YC9   nuclear factor Y, subunit C9   chr1:2882543-2884337 FORWARD LENGTH=1613                                                                                                                                                         |
| AT1G09000 | UCGAGUAUGAGCCUGAGUCAUG  | 250  | 4   | Cleavage    | Symbols: ANP1, MAPKKK1, NP1   NP1-related protein kinase 1   chr1:2891037-2895182 FORWARD LENGTH=2270                                                                                                                                                    |

|           |                         |       |                 |                                                                                                                                                                                                                                                       |
|-----------|-------------------------|-------|-----------------|-------------------------------------------------------------------------------------------------------------------------------------------------------------------------------------------------------------------------------------------------------|
| AT1G09010 | UUUGUUAACUCAUGGACACCC   | 165   | 4 Translation   | Symbols:   glycoside hydrolase family 2 protein   chr1:2895166-2899384 REVERSE LENGTH=3025                                                                                                                                                            |
| AT1G09020 | AUUGACGUCGAGUAUGAGCCU   | 2734  | 4 Translation   | Symbols: SNF4, ATSNF4   homolog of yeast sucrose nonfermenting 4   chr1:2899914-2904815 REVERSE LENGTH=2302                                                                                                                                           |
| AT1G09195 | UGCAUCGCGUAGGUCUGGCAG   | 378   | 4.5 Translation | Symbols:   FUNCTIONS IN: molecular_function unknown; INVOLVED IN: biological_process unknown; LOCATED IN: mitochondrion; CONTAINS InterPro DOMAIN/s: Metal-dependent phosphohydrolase, HD subdomain [InterPro:PR006674], Ppx                          |
| AT1G09400 | UUUAGAAGUCCCGUUAUCUG    | 387   | 3 Cleavage      | Symbols:   FMN-linked oxidoreductases superfamily protein   chr1:3033512-3035036 REVERSE LENGTH=1182                                                                                                                                                  |
| AT1G09540 | UUCUGAAGGACAAGAUACAGU   | 351   | 3.5 Cleavage    | Symbols: MYB61, ATMYB61   myb domain protein 61   chr1:3086159-3087912 FORWARD LENGTH=1498                                                                                                                                                            |
| AT1G09550 | UCUAGUCCGAAAAUUGCGAAC   | 163   | 5 Translation   | Symbols:   Pectinacetyltransferase family protein   chr1:3089733-3092327 REVERSE LENGTH=1240                                                                                                                                                          |
| AT1G09580 | UUUGAGACACUCUACAGACAGG  | 162   | 4.5 Translation | Symbols:   Pentatricopeptide repeat (PPR) superfamily protein   chr1:3134107-3135930 REVERSE LENGTH=1824                                                                                                                                              |
| AT1G09710 | UUGGCGUACACUCUGGAGAGU   | 1187  | 3.5 Translation | Symbols:   Homeodomain-like superfamily protein   chr1:3140872-3144370 FORWARD LENGTH=2138                                                                                                                                                            |
| AT1G09800 | UAUGACGAUUGUUGUACAGCCU  | 113   | 3.5 Cleavage    | Symbols:   Pseudouridine synthase family protein   chr1:3176883-3180421 REVERSE LENGTH=1442                                                                                                                                                           |
| AT1G09812 | UAUCUCUGUCUGUACGACCCU   | 295   | 3 Cleavage      | Symbols:   unknown protein; BEST Arabidopsis thaliana protein match is: unknown protein (TAIR:AT1G58007.2); Has 93 Blast hits to 93 proteins in 13 species: Archae - 0; Bacteria - 0; Metazoa - 0; Fungi - 93; Viruses - 0; Other Eukaryo             |
| AT1G09840 | UUJCAUCUGUCCGGCGUAGGCA  | 461   | 4 Translation   | Symbols: ATSK41, SK41   shaggy-like protein kinase 41   chr1:3195824-3200254 REVERSE LENGTH=1791                                                                                                                                                      |
| AT1G09850 | UUGAGAGAUCGCCUGUUAUCUG  | 3917  | 4 Cleavage      | Symbols: XBCP3   xylem bark cysteine peptidase 3   chr1:3201799-3204150 FORWARD LENGTH=1638                                                                                                                                                           |
| AT1G09870 | UUGAUCAAGUAGUCUAGACUCU  | 4031  | 3.5 Cleavage    | Symbols:   histidine acid phosphatase family protein   chr1:3205741-3208598 FORWARD LENGTH=1694                                                                                                                                                       |
| AT1G09940 | UUCUGUAGCAGGAGUUAUCUG   | 302   | 4 Cleavage      | Symbols:   HEMA2   glutamyl-tRNA reductase family protein   chr1:3236995-3239554 REVERSE LENGTH=2114                                                                                                                                                  |
| AT1G09980 | UUUGCCUGUUAAGACUCGAGUA  | 114   | 3.5 Cleavage    | Symbols:   Putative serine esterase family protein   chr1:3256245-3261614 REVERSE LENGTH=3156                                                                                                                                                         |
| AT1G10070 | UCUGUAUGCAUCUGUGGGACU   | 197   | 5 Cleavage      | Symbols:   ATBCAT-2, BCAT-2   branched-chain amino acid transaminase 2   chr1:3288087-3290471 FORWARD LENGTH=1558                                                                                                                                     |
| AT1G10240 | UGAAGUCAAUGUUCUACCCUCU  | 486   | 2.5 Cleavage    | Symbols:   FRS11   FAR1-related sequence 11   chr1:3356680-3359838 REVERSE LENGTH=2295                                                                                                                                                                |
| AT1G10290 | UGCAUUAUCUGGACUUAACCU   | 413   | 3.5 Cleavage    | Symbols:   ADLG, DRP2A   dynamin-like protein 6   chr1:3370558-3377463 FORWARD LENGTH=3304                                                                                                                                                            |
| AT1G10385 | AUUCGAGAACUCCUGACCCGCA  | 265   | 5 Cleavage      | Symbols:   Vps5/Vps67 family (components of vesicular transport) protein   chr1:3403224-3405856 FORWARD LENGTH=2265                                                                                                                                   |
| AT1G10450 | UGGAUUCGGCGUGCAUACUCU   | 392   | 5 Cleavage      | Symbols:   SNL6   SIN3-like 6   chr1:3431780-3438370 FORWARD LENGTH=4024                                                                                                                                                                              |
| AT1G10470 | CGAGAGAUAUCAGGGACUGUCU  | 3198  | 4 Translation   | Symbols:   ARR4, MEE7, ATRR1, IBC7   response regulator 4   chr1:3442327-3443957 REVERSE LENGTH=1275                                                                                                                                                  |
| AT1G10500 | UUUGAGCACUCUACAGACAGG   | 162   | 3.5 Translation | Symbols:   ATPCISCA, CPISCA   chloroplast-localized ISCA-like protein   chr1:3460000-3461485 REVERSE LENGTH=848                                                                                                                                       |
| AT1G10540 | AUUGGAUUUAGUACUUGCGUC   | 196   | 4.5 Cleavage    | Symbols:   ATNAT8, NAT8   nucleotide-6-ascorbate transporter 8   chr1:3474864-3477927 REVERSE LENGTH=1951                                                                                                                                             |
| AT1G10660 | UUAAACUAGAACCAUGUCCUAGA | 302   | 4.5 Translation | Symbols:   unknown protein; LOCATED IN: endomembrane system; EXPRESSED IN: 24 plant structures; EXPRESSED DURING: 15 growth stages; BEST Arabidopsis thaliana protein match is: unknown protein (TAIR:ATSG6290.1); Has 35333 Blast I                  |
| AT1G10670 | UCGGAACUCAAGGACCCCAANA  | 493   | 4.5 Cleavage    | Symbols:   ACLA-1   ATP-citrate lyase A-1   chr1:3535387-3538281 FORWARD LENGTH=1660                                                                                                                                                                  |
| AT1G10682 | UUJCAUCUGUCCGGCGUAGGCA  | 461   | 4.5 Translation | Symbols:   other RNA   chr1:3544991-3545471 REVERSE LENGTH=481                                                                                                                                                                                        |
| AT1G10720 | UCCAUGUCGAAGAACCGGGAAC  | 136   | 3.5 Cleavage    | Symbols:   BSD domain-containing protein   chr1:3562952-3564759 FORWARD LENGTH=1615                                                                                                                                                                   |
| AT1G11220 | UCAAACGUCUGAUJACUACUAG  | 118   | 3.5 Cleavage    | Symbols:   Protein of unknown function (DUF761)   chr1:3759862-3761165 REVERSE LENGTH=1093                                                                                                                                                            |
| AT1G11420 | CUCAGCGCAUACUCGACGUCU   | 968   | 3.5 Translation | Symbols:   ATDUF2, DUF2   DOMAIN OF UNKNOWN FUNCTION 724 2   chr1:3844581-3846872 REVERSE LENGTH=1815                                                                                                                                                 |
| AT1G11490 | UUUGAGAUAUCCCGUUAUCUG   | 3917  | 4 Translation   | Symbols:   zinc finger (C2H2 type) family protein   chr1:3868884-3870065 REVERSE LENGTH=1098                                                                                                                                                          |
| AT1G11545 | UAUUGAUUUUUGGCCUGAGAGU  | 116   | 3.5 Translation | Symbols:   XTH8   xyloglucan endotransglucosylase/hydrolase 8   chr1:3878550-3880361 REVERSE LENGTH=1132                                                                                                                                              |
| AT1G11560 | AUCCAAGUAGGUCACUCCUCU   | 1104  | 3.5 Translation | Symbols:     Oligosaccharyltransferase complex/magnesium transporter family protein   chr1:3881788-3882819 FORWARD LENGTH=1032                                                                                                                        |
| AT1G11592 | CGGAUUCUGAUUGCAUGUGGUG  | 186   | 2.5 Cleavage    | Symbols:   other RNA   chr1:3895268-3896934 REVERSE LENGTH=1073                                                                                                                                                                                       |
| AT1G11670 | UUGCAGAGAUGGAUGUAACAAC  | 101   | 3 Cleavage      | Symbols:   MATE efflux family protein   chr1:3928162-3931576 REVERSE LENGTH=1964                                                                                                                                                                      |
| AT1G11710 | UCCAAGUAGCUGACUCUCUCCU  | 596   | 4 Cleavage      | Symbols:   Pentatricopeptide repeat (PPR) superfamily protein   chr1:3948714-3951359 FORWARD LENGTH=2646                                                                                                                                              |
| AT1G11840 | UACGAGAAUGGGGCGCACACC   | 102   | 4.5 Cleavage    | Symbols:   ATGLS1, GLX1   glyoxalase I homolog   chr1:3995169-3997864 FORWARD LENGTH=1504                                                                                                                                                             |
| AT1G12110 | UAAGACUGAGAUAGCGGUGUCU  | 152   | 4.5 Cleavage    | Symbols:   NRT1.1, CHL1-1, NRT1, B-1, ATNRT1, CHL1   nitrate transporter 1.1   chr1:4105233-4109545 FORWARD LENGTH=2136                                                                                                                               |
| AT1G12140 | UAUGGCCUGGGAGCAUAUGCCA  | 299   | 4.5 Cleavage    | Symbols:   FMO G5-OX5   flavin-monooxygenase glucosinolate 5-oxygenase 5   chr1:4121369-4123542 FORWARD LENGTH=1567                                                                                                                                   |
| AT1G12300 | UAGCAUAUUAUCUUCUUGGCA   | 194   | 3.5 Cleavage    | Symbols:   Tetatricopeptide repeat (TPR)-like superfamily protein   chr1:4183066-4186124 REVERSE LENGTH=3059                                                                                                                                          |
| AT1G12350 | CGAGUAGUACAGGAUAUAGCG   | 152   | 2.5 Cleavage    | Symbols:   ATCOAB, COAB   4-phospho-panto-thienylcysteine synthetase I   chr1:4198413-4200802 FORWARD LENGTH=1279                                                                                                                                     |
| AT1G12380 | UUJACGAGACUCUAGGCCAACU  | 447   | 4 Cleavage      | Symbols:   unknown protein; BEST Arabidopsis thaliana protein match is: unknown protein (TAIR:AT1G62870.1); Has 173 Blast hits to 170 proteins in 34 species: Archae - 0; Bacteria - 4; Metazoa - 25; Fungi - 8; Plants - 123; Viruses - 7; Other Eul |
| AT1G12460 | UCAAAGACUACCAUCCUUAACU  | 144   | 3 Cleavage      | Symbols:   Leucine-rich repeat protein kinase family protein   chr1:4247249-4250630 FORWARD LENGTH=3289                                                                                                                                               |
| AT1G12470 | UACUGUUGAUUUCUGGAGUUG   | 123   | 5 Cleavage      | Symbols:   zinc ion binding   chr1:4251032-4257392 FORWARD LENGTH=3236                                                                                                                                                                                |
| AT1G12550 | UAUCGAGCACCUACGUGCAUCGU | 142   | 3.5 Translation | Symbols:   D-isomer specific 2-hydroxyacid dehydrogenase family protein   chr1:4274594-4275981 FORWARD LENGTH=1177                                                                                                                                    |
| AT1G12570 | UCCCAACCCAUAGAUUAAGCG   | 236   | 3 Cleavage      | Symbols:   Glycose-methanol-choline (GMC) oxidoreductase family protein   chr1:4277993-4280862 REVERSE LENGTH=2027                                                                                                                                    |
| AT1G12667 | UUGAGAUUAUCCCGUUAUCUG   | 106   | 4.5 Cleavage    | Symbols:   Encodes a Plant thionin family protein   chr1:4313858-4314204 FORWARD LENGTH=347                                                                                                                                                           |
| AT1G12770 | CAAAUGGAGACAGUACUGUCU   | 324   | 3.5 Cleavage    | Symbols:   ISE1, EMB1586   P-loop containing nucleoside triphosphate hydrolases superfamily protein   chr1:4351064-4353685 FORWARD LENGTH=2069                                                                                                        |
| AT1G12820 | UGGAUUCGGGCGUGCAUACUCC  | 392   | 5 Cleavage      | Symbols:   AFB3   auxin signaling F-box 3   chr1:4368760-4371293 REVERSE LENGTH=2229                                                                                                                                                                  |
| AT1G12850 | UAGCUACAAGAAACUUCUUCUG  | 1828  | 3 Translation   | Symbols:   Phosphoglycerate mutase family protein   chr1:4379707-4381612 REVERSE LENGTH=1568                                                                                                                                                          |
| AT1G12880 | UUCGAGAACUAUGAAGAUUGUA  | 448   | 3 Translation   | Symbols:   atnud12, NUOT12   nudix hydrolase homolog 12   chr1:4389751-4391151 FORWARD LENGTH=1002                                                                                                                                                    |
| AT1G12930 | UGGCAGUAGGAGUACACGACU   | 163   | 5 Cleavage      | Symbols:   ARM repeat superfamily protein   chr1:4398375-4405605 REVERSE LENGTH=3341                                                                                                                                                                  |
| AT1G12970 | UCCUUAUCAGUCUAGAAGAACGC | 272   | 5 Cleavage      | Symbols:   PIRL3   plant intracellular ras group-related LRR 3   chr1:4423640-4425789 FORWARD LENGTH=1639                                                                                                                                             |
| AT1G12990 | CAAAUUCGAGAACUCCUUGAG   | 283   | 4 Cleavage      | Symbols:   beta-1,4-N-acetylglucosaminyltransferase family protein   chr1:4433640-4436075 FORWARD LENGTH=2035                                                                                                                                         |
| AT1G13009 | UUUGAGCACUCUUCUAGCCGA   | 154   | 4.5 Translation | Symbols:   Protein of unknown function (DUF707)   chr1:4442605-4443947 REVERSE LENGTH=1675                                                                                                                                                            |
| AT1G13160 | UUUGAGUUAUUAUUAUUGAGCG  | 108   | 2.5 Translation | Symbols:   ARM repeat superfamily protein   chr1:4484584-4488577 FORWARD LENGTH=2654                                                                                                                                                                  |
| AT1G13210 | AUJAGCAAUUGUUGACAGCCU   | 113   | 5 Translation   | Symbols:   ACA1   autoinhibited Ca2+/ATPase II   chr1:4508963-4513938 REVERSE LENGTH=4065                                                                                                                                                             |
| AT1G13400 | UCGAGUGACUUGGAGGCAUJU   | 244   | 4 Cleavage      | Symbols:   NUB3, JGL1, C2H2 and C2HC zinc fingers superfamily protein   chr1:4597627-4598911 FORWARD LENGTH=781                                                                                                                                       |
| AT1G13410 | UACGGACCGCGGGUCUGGGCC   | 119   | 5 Cleavage      | Symbols:   Tetatricopeptide repeat (TPR)-like superfamily protein   chr1:4601261-4603298 FORWARD LENGTH=1814                                                                                                                                          |
| AT1G13448 | UACACUCACUUGAUUUAAGGAG  | 223   | 5 Cleavage      | Symbols:   other RNA   chr1:4612243-4612929 FORWARD LENGTH=592                                                                                                                                                                                        |
| AT1G13470 | UUGAGAGCACUCCACGACUUC   | 261   | 4.5 Translation | Symbols:   Protein of unknown function (DUF1262)   chr1:4620228-4621580 REVERSE LENGTH=1272                                                                                                                                                           |
| AT1G13490 | UUAAUCUACCCUUGGACACUC   | 380   | 4.5 Cleavage    | Symbols:   Protein of unknown function (DUF1262)   chr1:4624715-4626064 REVERSE LENGTH=1092                                                                                                                                                           |
| AT1G13530 | UUAAUCUACCCUUGGACACUC   | 380   | 4.5 Cleavage    | Symbols:   Protein of unknown function (DUF1262)   chr1:4633740-4635129 REVERSE LENGTH=1158                                                                                                                                                           |
| AT1G13560 | UCGAGUGACUUGGAGGACAUU   | 244   | 3 Cleavage      | Symbols:   APT1, ATAAPT1   aminoalcoholphosphotransferase 1   chr1:4638514-4642088 REVERSE LENGTH=1649                                                                                                                                                |
| AT1G13630 | UGACGGAAGCUACAGAGAGUUG  | 108   | 4.5 Cleavage    | Symbols:   Tetatricopeptide repeat (TPR)-like superfamily protein   chr1:4669784-4672826 REVERSE LENGTH=2421                                                                                                                                          |
| AT1G13800 | UUGAGAUUAUCCCGUUAUCUG   | 106   | 3.5 Cleavage    | Symbols:   Tetatricopeptide repeat (TPR)-like superfamily protein   chr1:4731056-4733707 REVERSE LENGTH=2652                                                                                                                                          |
| AT1G13870 | UAGAUAUUAUCUGUCUUGGCA   | 194   | 4 Cleavage      | Symbols:   DRL1, AKT112   calmodulin binding;purine nucleotide binding   chr1:4747265-4748642 REVERSE LENGTH=1148                                                                                                                                     |
| AT1G13920 | UCUAGUUCGGGCUUUUACAGC   | 163   | 3 Translation   | Symbols:   Remorin family protein   chr1:4758188-4759754 FORWARD LENGTH=1038                                                                                                                                                                          |
| AT1G14090 | UUUUUUCGGACUAGAUAAGGAC  | 107   | 3.5 Cleavage    | Symbols:   pseudogene, pentatricopeptide (PPR) repeat-containing protein, contains Pfam profile PF01535: PPR repeat; blastp match of 33% identity and 1.5e-16 P-value to GP 20219038 gb AAI15782.1 AC104428_3 AC104428 Putative indc                  |
| AT1G14220 | UAACUCUACCCUUAUGGACUCG  | 727   | 4.5 Cleavage    | Symbols:   Ribonuclease T2 family protein   chr1:4858642-4859601 REVERSE LENGTH=1687                                                                                                                                                                  |
| AT1G14300 | AUJAGCAUUAUUGUACAGCCG   | 113   | 4 Translation   | Symbols:   ARM repeat superfamily protein   chr1:4882376-4884791 REVERSE LENGTH=1403                                                                                                                                                                  |
| AT1G14350 | UUUGAGACUACUCCGCUUAGCG  | 170   | 4.5 Cleavage    | Symbols:   P, MYB124   Duplicated homeodomain-like superfamily protein   chr1:4907953-4911080 FORWARD LENGTH=2091                                                                                                                                     |
| AT1G14390 | UUGGGUGUACUCUUGUACUCU   | 106   | 4 Translation   | Symbols:   Leucine-rich repeat protein kinase family protein   chr1:4924277-4926794 FORWARD LENGTH=2244                                                                                                                                               |
| AT1G14440 | UGAAUAAAAACUAGCAAGUCC   | 263   | 3.5 Cleavage    | Symbols:   AHB31, HB31, ZHD4   homeobox protein 31   chr1:4938824-4940903 REVERSE LENGTH=1577                                                                                                                                                         |
| AT1G14520 | UUGAAGGAUUUGUGGUUUAACCA | 106   | 3 Cleavage      | Symbols:   MIOK1   myo-inositol oxygenase 1   chr1:4968142-4970007 REVERSE LENGTH=1217                                                                                                                                                                |
| AT1G14685 | UUUAGGAUUGUUGCAUAUGCA   | 1164  | 4 Cleavage      | Symbols:   BPC2, BBR/BPC2, ATBPC2   basic pentacysteine 2   chr1:5042323-5044294 FORWARD LENGTH=1453                                                                                                                                                  |
| AT1G14790 | CAAGAACCUGCAGACACUUCG   | 169   | 4.5 Cleavage    | Symbols:   RDR1, ATRDRP1   RNA-dependent RNA polymerase 1   chr1:5093961-5098032 REVERSE LENGTH=3807                                                                                                                                                  |
| AT1G14920 | UGGCGCUCACUCUGCAAGGUG   | 10625 | 3.5 Cleavage    | Symbols:   GAI, GAI2   GRAS family transcription factor family protein   chr1:5149226-5151354 FORWARD LENGTH=2129                                                                                                                                     |
| AT1G14980 | UAUAJAGGAGAGUACGACUUCU  | 298   | 4 Cleavage      | Symbols:   CNP10   chaperonin 10   chr1:5165628-5166745 REVERSE LENGTH=690                                                                                                                                                                            |
| AT1G15000 | UCGACACACUUGUACUAGUACU  | 174   | 3.5 Cleavage    | Symbols:   scpl50   serine carboxypeptidase-like 50   chr1:5168596-5170066 FORWARD LENGTH=1471                                                                                                                                                        |
| AT1G15030 | UUUGGCGCUCACUUGGCAAG    | 3787  | 4.5 Translation | Symbols:   Protein of unknown function (DUF789)   chr1:5177529-5180049 FORWARD LENGTH=1645                                                                                                                                                            |
| AT1G15165 | UACACUCACUUGAUUUAAGGAG  | 223   | 3 Cleavage      | Symbols:   RING/FYVE/PHD zinc finger superfamily protein   chr1:5217719-5220113 REVERSE LENGTH=1036                                                                                                                                                   |
| AT1G15250 | UAAAACUAGCAUUGGCUUAGA   | 302   | 3.5 Cleavage    | Symbols:   Zinc-binding ribosomal protein family protein   chr1:5248664-5249474 REVERSE LENGTH=542                                                                                                                                                    |
| AT1G15320 | UUUGUCUGAACAUUGACCUCCA  | 119   | 4 Cleavage      | Symbols:   unknown protein; FUNCTIONS IN: molecular_function unknown; INVOLVED IN: biological_process unknown; EXPRESSED IN: flower; EXPRESSED DURING: petal differentiation and expansion stage; Has 30201 Blast hits to 17322 protei                |
| AT1G15470 | UGCCUAGAUGUCUUCUACUUCU  | 125   | 3.5 Cleavage    | Symbols:   Transducin/WD40 repeat-like superfamily protein   chr1:5315507-5317863 FORWARD LENGTH=1416                                                                                                                                                 |
| AT1G15480 | UCAUUGUAGUUCUAGUUGCCU   | 245   | 4 Cleavage      | Symbols:   Tetatricopeptide repeat (TPR)-like superfamily protein   chr1:5318011-5320594 FORWARD LENGTH=2081                                                                                                                                          |
| AT1G15700 | UUUUGUAGUAGGUAAGCGCCU   | 355   | 3.5 Cleavage    | Symbols:   ATPC2   ATPase, F1 complex, gamma subunit protein   chr1:5402569-5403818 REVERSE LENGTH=1250                                                                                                                                               |
| AT1G15720 | UUUGAGAGUACCCUUGUACUGU  | 632   | 3 Cleavage      | Symbols:   TRFL1   TRF-like 1   chr1:5406025-5407486 FORWARD LENGTH=1462                                                                                                                                                                              |
| AT1G15750 | UUUGCAGAGAUGGAUGUAACAAC | 101   | 3 Translation   | Symbols:   WSIP1, TPL   Transducin family protein / WD-40 repeat family protein   chr1:5414817-5420630 REVERSE LENGTH=3829                                                                                                                            |
| AT1G15800 | UUUAGCCUAGGUGUAGGACGCC  | 213   | 4 Cleavage      | Symbols:   unknown protein; BEST Arabidopsis thaliana protein match is: unknown protein (TAIR:AT1G80610.1); Has 56 Blast hits to 52 proteins in 9 species: Archae - 0; Bacteria - 0; Metazoa - 0; Fungi - 56; Viruses - 0; Other Eukaryoti            |

|           |                          |       |     |             |                                                                                                                                                                                                                                                         |
|-----------|--------------------------|-------|-----|-------------|---------------------------------------------------------------------------------------------------------------------------------------------------------------------------------------------------------------------------------------------------------|
| AT1G15860 | CUCAAGAUGUUAUAGGGCUUG    | 110   | 4.5 | Cleavage    | [ Symbols:   Domain of unknown function (DUF298)   chr1:5454785-5457022 FORWARD LENGTH=1077                                                                                                                                                             |
| AT1G15950 | UUGAGAGCAUCCACCGACU      | 261   | 4   | Cleavage    | [ Symbols: CCR1, IRK4, ATCCR1   cinnamoyl coa reductase 1   chr1:5478754-5482180 FORWARD LENGTH=1401                                                                                                                                                    |
| AT1G16000 | UUUGGUUCUGAGUCCGCCCU     | 669   | 3.5 | Cleavage    | [ Symbols: unknown protein; BEST Arabidopsis thaliana protein match is: unknown protein (TAIR:ATIG08090.1); Has 41 Blast hits to 40 proteins in 10 species: Archae - 0; Bacteria - 0; Metazoa - 0; Fungi - 0; Plants - 41; Viruses - 0; Other Eukaryo   |
| AT1G16010 | UCAUCAUGAACAUCUUGGCU     | 103   | 3   | Translation | [ Symbols: MGT2   magnesium transporter 2   chr1:5495373-5497723 REVERSE LENGTH=1731                                                                                                                                                                    |
| AT1G16030 | UCAAACACUCUGAUACAUCUAG   | 143   | 4   | Cleavage    | [ Symbols: Hsp70b   heat shock protein 70b   chr1:5502206-5504535 REVERSE LENGTH=2330                                                                                                                                                                   |
| AT1G16070 | UUAGCCUGAGGUUGGACGCCU    | 231   | 4   | Cleavage    | [ Symbols: ATLPL8, TLP8   tubby like protein 8   chr1:5511873-5513896 REVERSE LENGTH=1337                                                                                                                                                               |
| AT1G16090 | UUGCCCAACUUAACUCUACCU    | 279   | 4   | Cleavage    | [ Symbols: WAKL7   wall associated kinase-like 7   chr1:5516259-5517822 FORWARD LENGTH=1310                                                                                                                                                             |
| AT1G16150 | UUUCUUGAGACUUGGAGUACCU   | 265   | 3.5 | Cleavage    | [ Symbols: WAKL4   wall associated kinase-like 4   chr1:5532415-5534877 FORWARD LENGTH=2340                                                                                                                                                             |
| AT1G16220 | UCUCUUGUUGUUCUUGUGCGCA   | 1437  | 4   | Cleavage    | [ Symbols:   Protein phosphatase 3C family protein   chr1:5548653-5550553 FORWARD LENGTH=1476                                                                                                                                                           |
| AT1G16320 | UGGAGAUGUAUAUUAUUGCCG    | 126   | 4.5 | Cleavage    | [ Symbols:   Uncharacterized conserved protein (DUF2358)   chr1:5580855-5582143 FORWARD LENGTH=1129                                                                                                                                                     |
| AT1G16330 | UCGAGUAUGAGGCCUGAGUCAUG  | 250   | 3.5 | Cleavage    | [ Symbols: CYCB3;1   cyclin b3;1   chr1:5582387-5587391 REVERSE LENGTH=1947                                                                                                                                                                             |
| AT1G16430 | UAAGGAGAGUGCAGCUAUUGGA   | 134   | 3   | Cleavage    | [ Symbols:   Surfeit locus protein 5 subunit 22 of Mediator complex   chr1:5614619-5615510 FORWARD LENGTH=579                                                                                                                                           |
| AT1G16570 | UUCCCGUUGGUGUGGCGCCAC    | 196   | 4.5 | Cleavage    | [ Symbols:   UDP-Glycosyltransferase superfamily protein   chr1:5670577-5673600 REVERSE LENGTH=1636                                                                                                                                                     |
| AT1G16700 | UGAGUAGAAUUCAGUCAUAUUC   | 114   | 3.5 | Cleavage    | [ Symbols:   Alpha-helical ferredoxin   chr1:5709725-5711902 FORWARD LENGTH=1061                                                                                                                                                                        |
| AT1G16760 | UUGAGAUAUCCCGUUAUCUG     | 3917  | 3.5 | Cleavage    | [ Symbols:   Protein kinase protein with adenine nucleotide alpha hydrolases-like domain   chr1:5734234-5737307 FORWARD LENGTH=2277                                                                                                                     |
| AT1G16920 | UUGGUCACACGACUUGGACUUG   | 104   | 4.5 | Cleavage    | [ Symbols: RAB11, ATRABA1B, RABA1b   RAB GTPase homolog A1B   chr1:5787330-5789249 REVERSE LENGTH=912                                                                                                                                                   |
| AT1G16950 | UGAGUAGAAUUCGUAUCAUUC    | 114   | 2.5 | Cleavage    | [ Symbols:   unknown protein; FUNCTIONS IN: molecular_function unknown; INVOLVED IN: biological_process unknown; LOCATED IN: endomembrane system; EXPRESSED IN: stamen; EXPRESSED DURING: 4 anthesis; Has 17 Blast hits to 17 prote                     |
| AT1G16980 | UCUAGUUCACAUUUUUCGGAC    | 427   | 3.5 | Translation | [ Symbols: ATPPS2, TPS2   trehalose-phosphatase/synthase 2   chr1:5807311-5811488 FORWARD LENGTH=2466                                                                                                                                                   |
| AT1G17140 | UAACUCACAUUGAUUCUAGGAG   | 223   | 4   | Cleavage    | [ Symbols: ICR1, R1P1   interactor of constitutive active rops 1   chr1:5856573-5858550 REVERSE LENGTH=1459                                                                                                                                             |
| AT1G17210 | UUUGAAUCUUGGUAUACCUA     | 227   | 4   | Cleavage    | [ Symbols: ATLIP1, ILP1   IAP-like protein 1   chr1:5880130-5884756 REVERSE LENGTH=3348                                                                                                                                                                 |
| AT1G17345 | CUCGGGAAAGAAGAAGAGGCU    | 259   | 2.5 | Cleavage    | [ Symbols:   SAUR-like auxin-responsive protein family   chr1:5940423-5941210 FORWARD LENGTH=788                                                                                                                                                        |
| AT1G17500 | UUGAGAGUUAUUGGUGUUAACCA  | 106   | 4   | Translation | [ Symbols:   ATPase E1-E2 type family protein / haloacid dehalogenase-like hydrolase family protein   chr1:6018757-6023503 FORWARD LENGTH=3953                                                                                                          |
| AT1G17580 | AUUUGUACUAGAUAAGACCU     | 768   | 4   | Cleavage    | [ Symbols: MYA1, ATMYA1, XI-1   myosin 1   chr1:6039303-6049556 FORWARD LENGTH=4960                                                                                                                                                                     |
| AT1G17665 | AUUUGGAGACAUCCUCCAGACC   | 255   | 4.5 | Cleavage    | [ Symbols:   unknown protein; FUNCTIONS IN: molecular_function unknown; INVOLVED IN: biological_process unknown; LOCATED IN: endomembrane system; EXPRESSED IN: 15 plant structures; EXPRESSED DURING: 11 growth stages; Has 149 B                      |
| AT1G17780 | UGACACCGAAUUCUGAUUGCUU   | 823   | 4   | Translation | [ Symbols:   unknown protein; BEST Arabidopsis thaliana protein match is: unknown protein (TAIR:AT2G16575.1); Has 35333 Blast hits to 34131 proteins in 2444 species: Archae - 798; Bacteria - 22429; Metazoa - 974; Fungi - 993; Plants - 533; Vi      |
| AT1G17790 | UGACGGUUCAGAUUCAGGAGC    | 107   | 3.5 | Translation | [ Symbols:   DNA-binding bromodomain-containing protein   chr1:6125356-6127404 REVERSE LENGTH=1768                                                                                                                                                      |
| AT1G17830 | UUUGUUUAACUUAUGGACCCACC  | 165   | 3.5 | Translation | [ Symbols:   Protein of unknown function (DUF789)   chr1:6135803-6138432 REVERSE LENGTH=1589                                                                                                                                                            |
| AT1G18060 | UAUAJAGGAGAGUACGCUACU    | 298   | 4   | Cleavage    | [ Symbols:   unknown protein; INVOLVED IN: biological_process unknown; LOCATED IN: chloroplast; EXPRESSED IN: 22 plant structures; EXPRESSED DURING: 13 growth stages; Has 74 Blast hits to 74 proteins in 29 species: Archae - 0; Bacteria - 1         |
| AT1G18190 | UAACAAGAACUUCUUAUUUCU    | 235   | 3.5 | Cleavage    | [ Symbols: GC2   golgin candidate 2   chr1:6257851-6261457 REVERSE LENGTH=2251                                                                                                                                                                          |
| AT1G18340 | UACAGGAAGUGGGGCGCACACC   | 102   | 3.5 | Cleavage    | [ Symbols:   basal transcription factor complex subunit-related   chr1:6311483-6313931 REVERSE LENGTH=1232                                                                                                                                              |
| AT1G18370 | UUUUUAUAUUAUUAUUAUUAU    | 133   | 3   | Cleavage    | [ Symbols: HKI, ATNACK1, NACK1   ATP binding microtubule motor family protein   chr1:6319650-6324222 REVERSE LENGTH=3118                                                                                                                                |
| AT1G18410 | UAACUCUACCCUUGUACGUCG    | 727   | 4   | Translation | [ Symbols:   P-loop containing nucleoside triphosphate hydrolases superfamily protein   chr1:6336528-6342460 REVERSE LENGTH=3423                                                                                                                        |
| AT1G18480 | UUGGAGAACUCCUUGACCGGCA   | 1272  | 4   | Translation | [ Symbols:   Calcinurin-like metallo-phosphoesterase superfamily protein   chr1:6361629-6363007 FORWARD LENGTH=1379                                                                                                                                     |
| AT1G18520 | UGUCCCAACUUAACUUAACCU    | 279   | 3.5 | Cleavage    | [ Symbols: TET11   tetraspanin11   chr1:6374932-6376316 FORWARD LENGTH=1073                                                                                                                                                                             |
| AT1G18660 | CGAGAGAUUACAGGGGACUGUC   | 3198  | 3.5 | Translation | [ Symbols:   zinc finger (C3HC4-type RING finger) family protein   chr1:6421225-6425880 FORWARD LENGTH=1906                                                                                                                                             |
| AT1G18800 | UUUUGCUUAGACUUAAGAAACU   | 179   | 2   | Cleavage    | [ Symbols: NRP2   NAP1-related protein 2   chr1:6481113-6483596 REVERSE LENGTH=1257                                                                                                                                                                     |
| AT1G19190 | UUCGAGGUUCUUGUAGCCCAAC   | 156   | 4   | Cleavage    | [ Symbols:   alpha/beta-Hydrolases superfamily protein   chr1:6623876-6624977 FORWARD LENGTH=1102                                                                                                                                                       |
| AT1G19340 | UACAGAAUAGGCUUAAGUAAUC   | 189   | 4   | Translation | [ Symbols:   Methyltransferase MT-A70 family protein   chr1:6684751-6687116 FORWARD LENGTH=1610                                                                                                                                                         |
| AT1G19350 | CUUGGCUUAAGGUAAGAGCCCU   | 234   | 4   | Cleavage    | [ Symbols: BES1, B2B2   brassinosteroid signalling positive regulator (BZR1) family protein   chr1:6688703-6690410 FORWARD LENGTH=1304                                                                                                                  |
| AT1G19450 | UUGCGGACUCGGAUAGGUAAGG   | 101   | 4   | Cleavage    | [ Symbols:   Major facilitator superfamily protein   chr1:6731434-6734882 REVERSE LENGTH=1953                                                                                                                                                           |
| AT1G19550 | UAGAUGUUUAUGUAUGUUGCA    | 232   | 3.5 | Cleavage    | [ Symbols:   Glutathione S-transferase family protein   chr1:6767451-6767983 REVERSE LENGTH=462                                                                                                                                                         |
| AT1G19570 | UAGAGUUGUUAUGUAUGUUGCA   | 232   | 3.5 | Cleavage    | [ Symbols: DHAR1, ATDHAR1, DHAR5   dehydroascorbate reductase   chr1:6773311-6774528 REVERSE LENGTH=905                                                                                                                                                 |
| AT1G19720 | UUGAUCCAAGUAGCUGACUCU    | 4031  | 4   | Cleavage    | [ Symbols:   Pentatricopeptide repeat (PPR-like) superfamily protein   chr1:6819564-6822711 REVERSE LENGTH=3069                                                                                                                                         |
| AT1G19770 | UUCAGGGUGAGAUAUUAUGACU   | 1291  | 4.5 | Cleavage    | [ Symbols: ATPUP14, PUP14   purine permease 14   chr1:6832347-6833837 FORWARD LENGTH=1396                                                                                                                                                               |
| AT1G19850 | UUUGAUUACCCGUAUAAUCUC    | 175   | 3   | Translation | [ Symbols: MP, ARF5, IA24   Transcriptional factor B3 family protein / auxin-responsive factor AUX/IAA-related   chr1:6886879-6891374 FORWARD LENGTH=3375                                                                                               |
| AT1G19910 | CGAGAGAUUACAGGGACUACUC   | 3198  | 3   | Cleavage    | [ Symbols: APMs, APE2, AVA-2PE, ATVHA-C2   ATPase, F0/V0 complex, subunit C protein   chr1:6913229-6914594 FORWARD LENGTH=858                                                                                                                           |
| AT1G19920 | UUGAAAGACUUGUGGUAACACC   | 926   | 4   | Cleavage    | [ Symbols: APS2, ASA1   Pseudouridine synthase/archaeosine transglycosylase-like family protein   chr1:6914613-6916805 REVERSE LENGTH=1801                                                                                                              |
| AT1G19940 | CAACUAACACAGGCGGACGUCU   | 198   | 4   | Cleavage    | [ Symbols: AIGH985, GH985   glycosyl hydrolase 985   chr1:6918191-6920377 REVERSE LENGTH=1789                                                                                                                                                           |
| AT1G19970 | UACAAAUUCGACGACUCCUCG    | 156   | 4   | Cleavage    | [ Symbols:   ER lumen protein retaining receptor family protein   chr1:6931012-6932689 REVERSE LENGTH=1093                                                                                                                                              |
| AT1G20080 | CAUCAAGAACCGUUAUGCCUCU   | 125   | 5   | Cleavage    | [ Symbols: SYTB, ATSYTB, NTCM2YPE1.2, NTCM2T1.2, SYT2   Calcium-dependent lipid-binding (CaLB domain) family protein   chr1:6962132-6965045 FORWARD LENGTH=1851                                                                                         |
| AT1G20400 | UUUGGCAUCUAAUCUUGCAAG    | 1274  | 4   | Cleavage    | [ Symbols:   Protein of unknown function (DUF1204)   chr1:7072192-7075838 REVERSE LENGTH=2835                                                                                                                                                           |
| AT1G20570 | UGGCACUACAACUCUGCAAGG    | 834   | 4   | Cleavage    | [ Symbols:   Spc97 / Spc98 family of spindle pole body (SPB) component   chr1:7121028-7126559 REVERSE LENGTH=2931                                                                                                                                       |
| AT1G20620 | CGAGAGAUUACAGGGACGUGUC   | 3198  | 3.5 | Cleavage    | [ Symbols: CAT3, SEN2, ATCAT3   catalase 3   chr1:7143067-7146477 FORWARD LENGTH=1817                                                                                                                                                                   |
| AT1G20750 | UGAGGCUUACGAUUGAGAGGACU  | 107   | 3.5 | Cleavage    | [ Symbols:   RAD3-like DNA-binding helicase protein   chr1:72037302-7208998 REVERSE LENGTH=3435                                                                                                                                                         |
| AT1G20980 | UUGGAGUACCAAGAGUGAUAAG   | 215   | 4.5 | Cleavage    | [ Symbols: SPL14, FRB6, SPL1R2, ATSP14   squamosa promoter binding protein-like 14   chr1:7324588-7329385 FORWARD LENGTH=4014                                                                                                                           |
| AT1G21000 | UUUGAGCCUCUACUAUAGAGA    | 679   | 4.5 | Translation | [ Symbols:   PLAT2 transcription factor family protein   chr1:7337819-7339437 FORWARD LENGTH=1194                                                                                                                                                       |
| AT1G21140 | UAUAUCUUCGCGCAUAAACCU    | 222   | 3   | Translation | [ Symbols:   Vacuolar iron transporter (VIT) family protein   chr1:7404383-7405281 FORWARD LENGTH=899                                                                                                                                                   |
| AT1G21160 | UUAUAUCUACCCUUAUGCAUCG   | 123   | 5   | Cleavage    | [ Symbols:   eukaryotic translation initiation factor 2 (eIF-2) family protein   chr1:7407955-7412857 REVERSE LENGTH=3724                                                                                                                               |
| AT1G21210 | UGCCUAGAUUUGCUUACUUGGA   | 125   | 3.5 | Cleavage    | [ Symbols:   WAK4   wall associated kinase 4   chr1:7424106-7427041 FORWARD LENGTH=2588                                                                                                                                                                 |
| AT1G21390 | UCUGUAUGUAUAUCUUGGGAC    | 1212  | 4   | Cleavage    | [ Symbols: emb2170   embryo defective 2170   chr1:7489151-7490737 REVERSE LENGTH=1164                                                                                                                                                                   |
| AT1G21590 | UAACUCUACCCUUAUUGCACUCA  | 473   | 4.5 | Translation | [ Symbols:   Protein kinase protein with adenine nucleotide alpha hydrolases-like domain   chr1:7566232-7569902 REVERSE LENGTH=2860                                                                                                                     |
| AT1G21630 | UUCCCGAGGAGAGGCGUCCUC    | 112   | 2.5 | Cleavage    | [ Symbols:   Calcium-binding EF hand family protein   chr1:7581152-7588151 FORWARD LENGTH=4317                                                                                                                                                          |
| AT1G21690 | UGUUGAUCCAAGUAGUGACUCU   | 608   | 3   | Cleavage    | [ Symbols: EMB1968   ATPase family associated with various cellular activities (AAA)   chr1:7615644-7618501 FORWARD LENGTH=1169                                                                                                                         |
| AT1G21710 | UGCAUCGCGUAGGUCUGCGAG    | 378   | 3   | Translation | [ Symbols: OGG1, ATOGG1   8-oxoguanine-DNA glycosylase 1   chr1:7624396-7626116 FORWARD LENGTH=1388                                                                                                                                                     |
| AT1G21960 | UUUGUUAACUUAUGUGGACACC   | 165   | 3.5 | Cleavage    | [ Symbols:   RING/U-box superfamily protein   chr1:7725972-7726586 FORWARD LENGTH=615                                                                                                                                                                   |
| AT1G21990 | UAUGGAGUAUGAUGCAAUGGCA   | 937   | 4.5 | Cleavage    | [ Symbols:   F-box/RNI-like/FBD-like domains-containing protein   chr1:7740530-7742106 REVERSE LENGTH=1398                                                                                                                                              |
| AT1G22020 | UUCACAUUCCGGGCUAGGCGCA   | 461   | 4   | Translation | [ Symbols: SHM6   serine hydroxymethyltransferase 6   chr1:7754321-7757383 FORWARD LENGTH=2374                                                                                                                                                          |
| AT1G22170 | UAGAUAUAUUAUGUCUUGGCU    | 194   | 3.5 | Cleavage    | [ Symbols:   Phosphoglycerate mutase family protein   chr1:7826289-7828326 FORWARD LENGTH=1392                                                                                                                                                          |
| AT1G22180 | UUUGAGGAGUAUUGAGCGCGCC   | 4887  | 3.5 | Cleavage    | [ Symbols:   Sec14p-like phosphatidylinositol transfer family protein   chr1:7828328-7830275 REVERSE LENGTH=1101                                                                                                                                        |
| AT1G22250 | UUGGAGGUAUUGAGUAGGAGGCU  | 515   | 2.5 | Cleavage    | [ Symbols:   unknown protein; BEST Arabidopsis thaliana protein match is: unknown protein (TAIR:AT1G78170.1); Has 64 Blast hits to 64 proteins in 10 species: Archae - 0; Bacteria - 0; Metazoa - 0; Fungi - 0; Plants - 64; Viruses - 0; Other Eukaryo |
| AT1G22300 | UGCGGCUACUUCUGUCCAAGGCU  | 10625 | 5   | Cleavage    | [ Symbols: GRF10, GF14 (EPSILON)   general regulatory factor 10   chr1:7878967-7881219 REVERSE LENGTH=1185                                                                                                                                              |
| AT1G22360 | UAGUCUAAACAAGAAUUCUUAUCU | 426   | 4.5 | Cleavage    | [ Symbols: AUGHT85A2, UGT85A2   UDP-glucosyl transferase 85A2   chr1:7894858-7897591 REVERSE LENGTH=1684                                                                                                                                                |
| AT1G22410 | AAAUAAAACUGGAACUAGCCUCU  | 203   | 3.5 | Translation | [ Symbols:   Class-II DHP synthetase family protein   chr1:7912046-7915003 FORWARD LENGTH=1919                                                                                                                                                          |
| AT1G22570 | UCCACCGACUGAUGAACAAUGU   | 1524  | 4   | Translation | [ Symbols:   Major facilitator superfamily protein   chr1:7976620-7978573 REVERSE LENGTH=1698                                                                                                                                                           |
| AT1G22750 | UUGCAGAGAUGGAUGUAACAAC   | 101   | 3.5 | Cleavage    | [ Symbols:   unknown protein; CONTAINS InterPro DOMAINs: Protein of unknown function DUF1475 (InterPro:IPRO09943); Has 186 Blast hits to 155 proteins in 21 species: Archae - 0; Bacteria - 8; Metazoa - 3; Fungi - 0; Plants - 65; Viruses - 0; O      |
| AT1G22770 | UGGAUUCGGGCGUACUUAUUC    | 392   | 4   | Cleavage    | [ Symbols: GJ, FB   gigantea protein (GJ)   chr1:8061844-8067716 FORWARD LENGTH=4136                                                                                                                                                                    |
| AT1G22910 | GCAAGUGAUGUAUAAAAGACA    | 100   | 3.5 | Cleavage    | [ Symbols:   RNA-binding (RRM/RBD/RNP motifs) family protein   chr1:8105589-8108164 FORWARD LENGTH=1478                                                                                                                                                 |
| AT1G22930 | UUUGUAUGCAUAUACUUGGGAC   | 135   | 3.5 | Translation | [ Symbols:   T-complex protein 11   chr1:8117732-8122127 FORWARD LENGTH=3577                                                                                                                                                                            |
| AT1G22960 | UGACGCGCAAUUCUGAAGAUUG   | 154   | 4.5 | Cleavage    | [ Symbols:   Pentatricopeptide repeat (PPR) superfamily protein   chr1:8128086-8130242 REVERSE LENGTH=2157                                                                                                                                              |
| AT1G22970 | UUUGUGGAUCCGUGUCUGUUA    | 152   | 3.5 | Translation | [ Symbols:   unknown protein; BEST Arabidopsis thaliana protein match is: unknown protein (TAIR:AT1G71150.1); Has 134 Blast hits to 132 proteins in 48 species: Archae - 0; Bacteria - 0; Metazoa - 66; Fungi - 10; Plants - 48; Viruses - 0; Other Eui |
| AT1G22980 | UAGAUGUAAGUUGGGACAGGA    | 199   | 4   | Cleavage    | [ Symbols:   unknown protein; BEST Arabidopsis thaliana protein match is: unknown protein (TAIR:AT1G22970.1); Has 52 Blast hits to 50 proteins in 17 species: Archae - 0; Bacteria - 0; Metazoa - 8; Fungi - 0; Plants - 44; Viruses - 0; Other Eukaryo |
| AT1G23170 | UCUAUAGGCAUUAUCUUAUCU    | 106   | 5   | Translation | [ Symbols:   Protein of unknown function DUF2359, transmembrane   chr1:82121724-8215516 FORWARD LENGTH=1710                                                                                                                                             |
| AT1G23200 | UUUCUUGUGAACUUGACGGGGA   | 158   | 3.5 | Translation | [ Symbols:   Plant invertebrate/pectin methyltransferase inhibitor superfamily   chr1:8222178-8229582 FORWARD LENGTH=1905                                                                                                                               |
| AT1G23210 | UCUAUUGCCGUUUUUCACAG     | 163   | 4.5 | Cleavage    | [ Symbols: AUGH986, GH986   glycosyl hydrolase 986   chr1:8240174-8242129 FORWARD LENGTH=1470                                                                                                                                                           |
| AT1G23260 | UUGAUCCAAGUAGCUGACUCU    | 4031  | 3.5 | Cleavage    | [ Symbols: MM21, UEV1A   MMS ZWEI homologue 1   chr1:8256986-8258688 REVERSE LENGTH=815                                                                                                                                                                 |
| AT1G23400 | UAUGGAGACUUGGCUACAGGCC   | 212   | 4   | Cleavage    | [ Symbols: CAF2, ATCAF2   RNA-binding CRS1 / Ythbf (CRM) domain-containing protein   chr1:8312076-8314744 REVERSE LENGTH=1822                                                                                                                           |
| AT1G23430 | UUUGGAGUUAUUGGAGGCGCU    | 141   | 3   | Translation | [ Symbols:   pseudogene, hypothetical protein   chr1:834662-836440 REVERSE LENGTH=178                                                                                                                                                                   |
| AT1G23660 | UCAAACUCUUGAUACAUCUAG    | 143   | 4   | Cleavage    | [ Symbols:   Domain of unknown function DUF220   chr1:8371609-8372845 REVERSE LENGTH=868                                                                                                                                                                |
| AT1G23830 | UGACGGACAAGUAAGUUGCU     | 1505  | 4   | Cleavage    | [ Symbols:   unknown protein; FUNCTIONS IN: molecular_function unknown; INVOLVED IN: biological_process unknown; LOCATED IN: endomembrane system; EXPRESSED IN: 12 plant structures; EXPRESSED DURING: 9 growth stages; BEST Arabi                      |

|           |                        |      |                 |                                                                                                                                                                                                                                                        |
|-----------|------------------------|------|-----------------|--------------------------------------------------------------------------------------------------------------------------------------------------------------------------------------------------------------------------------------------------------|
| AT1G23870 | UUUUUCGGACUAGAUAGGACU  | 107  | 5 Translation   | [ Symbols: ATP5P9, TP59   trehalose-phosphatase/synthase 9   chr1:8432179-8435656 FORWARD LENGTH=2973                                                                                                                                                  |
| AT1G24240 | UAUUUGAUUUUUGGCCUGAGGU | 116  | 3.5 Cleavage    | [ Symbols:   Ribosomal protein L19 family protein   chr1:8586353-8588116 FORWARD LENGTH=893                                                                                                                                                            |
| AT1G24265 | UAGAUAACAAGAACUCUUCU   | 107  | 3 Translation   | [ Symbols:   Protein of unknown function (DUF1664)   chr1:8600477-8603801 FORWARD LENGTH=1283                                                                                                                                                          |
| AT1G24320 | CAAAUCGGACAGCUACUGCU   | 324  | 5 Cleavage      | [ Symbols:   Six-hairpin glycosidases superfamily protein   chr1:8626315-8630971 REVERSE LENGTH=2528                                                                                                                                                   |
| AT1G24430 | UGCCAUUGAUGGAGAGCGCCU  | 164  | 3.5 Translation | [ Symbols:   HXXXD-type acyl-transferase family protein   chr1:8658003-8659506 REVERSE LENGTH=1504                                                                                                                                                     |
| AT1G24510 | CUUGGCAUCGAUUUUAAGACU  | 1059 | 3 Cleavage      | [ Symbols:   TRN-1/cpn60 chaperonin family protein   chr1:8685271-8688247 REVERSE LENGTH=2200                                                                                                                                                          |
| AT1G24590 | UAUUGCGAGAGCGGCGUGGCG  | 334  | 4.5 Cleavage    | [ Symbols:   DCLN, DCLN-LIKE, SOB2, ESR2   DORNROSCHEN-like   chr1:8714389-8715309 REVERSE LENGTH=921                                                                                                                                                  |
| AT1G24650 | UGAAGGACACUACAGCUGCU   | 1483 | 5 Cleavage      | [ Symbols:   Leucine-rich repeat protein kinase family protein   chr1:8734570-8737315 FORWARD LENGTH=2661                                                                                                                                              |
| AT1G25320 | UGAGUUGUCUAGAGGAAAGAG  | 101  | 2 Translation   | [ Symbols:   Leucine-rich repeat protein kinase family protein   chr1:8877857-8880310 FORWARD LENGTH=2370                                                                                                                                              |
| AT1G25360 | UAGAUAUUAUCUUGUUGGCA   | 194  | 4 Translation   | [ Symbols:   Pentatricopeptide repeat (PPR) superfamily protein   chr1:8894428-8896800 FORWARD LENGTH=2373                                                                                                                                             |
| AT1G25375 | UGUGGAUUAACAAGAUUGGGCU | 111  | 3.5 Cleavage    | [ Symbols:   Metallo-hydrolase/oxidoreductase superfamily protein   chr1:8900153-8903257 REVERSE LENGTH=1738                                                                                                                                           |
| AT1G25400 | UCCUGAGUACUCUUCUCCAAG  | 209  | 4 Cleavage      | [ Symbols:   unknown protein; FUNCTIONS IN: molecular_function unknown; INVOLVED IN: biological_process unknown; LOCATED IN: cellular_component unknown; EXPRESSED IN: 20 plant structures; EXPRESSED DURING: 10 growth stages; BE5                    |
| AT1G25682 | UGAAGGACAAAGUACAGCUGCU | 415  | 3.5 Cleavage    | [ Symbols:   Family of unknown function (DUF572)   chr1:9002285-9004646 REVERSE LENGTH=1244                                                                                                                                                            |
| AT1G26090 | UGACUCGCGUAGGUCUGGCAG  | 378  | 5 Translation   | [ Symbols:   P-loop containing nucleoside triphosphate hydrolases superfamily protein   chr1:9020380-9022769 FORWARD LENGTH=1647                                                                                                                       |
| AT1G26130 | UUUCCCUAGAAUUUUUUCUCCU | 1646 | 3 Cleavage      | [ Symbols:   ATPase E1-E2 type family protein / haloacid dehalogenase-like hydrolase family protein   chr1:9033218-9038577 FORWARD LENGTH=4016                                                                                                         |
| AT1G26650 | UGACGGAAGCUACAGAGGAGU  | 108  | 4.5 Cleavage    | [ Symbols:   unknown protein; BEST Arabidopsis thaliana protein match is: unknown protein (TAIR:AT1G69430.1); Has 205 Blast hits to 204 proteins in 17 species: Archae - 0; Bacteria - 0; Metazoa - 0; Fungi - 0; Plants - 205; Viruses - 0; Other Euk |
| AT1G26690 | CGGAGGAAACUAGCAGCGCC   | 103  | 4 Cleavage      | [ Symbols:   emp24/gp25L/p24 family/GOLD family protein   chr1:9224145-9225775 REVERSE LENGTH=892                                                                                                                                                      |
| AT1G26770 | UGUAUGCAUAACUUGGGACAU  | 149  | 5 Cleavage      | [ Symbols:   ATEXPA10, AT-EXP10, ATEXP10, ATHEXP ALPHA 1.1, EXP10, EXPA10   expansin A10   chr1:9259605-9261313 FORWARD LENGTH=1366                                                                                                                    |
| AT1G26799 | UUUAUUACACAGUGGACUGUG  | 118  | 3.5 Cleavage    | [ Symbols:   Plant self-incompatibility protein S1 family   chr1:9283873-9284438 FORWARD LENGTH=566                                                                                                                                                    |
| AT1G26850 | UCCCGGAUUGCGAAGAAGUA   | 113  | 4 Translation   | [ Symbols:   S-adenosyl-L-methionine-dependent methyltransferases superfamily protein   chr1:9300873-9304133 REVERSE LENGTH=2301                                                                                                                       |
| AT1G26890 | UAUGCUUCUUGUGAUCCACU   | 344  | 3.5 Cleavage    | [ Symbols:   FBD, F-box and Leucine Rich Repeat domains containing protein   chr1:9317589-9319246 FORWARD LENGTH=1428                                                                                                                                  |
| AT1G26900 | UGACCAACUUGCAUGAUGAU   | 174  | 4 Translation   | [ Symbols:   Pentatricopeptide repeat (PPR) superfamily protein   chr1:9319756-9321474 REVERSE LENGTH=1719                                                                                                                                             |
| AT1G26938 | CUCAACAUGUAUUAUGGCUU   | 208  | 4.5 Cleavage    | [ Symbols:   Galactose oxidase/keich repeat superfamily protein   chr1:9336057-9337786 REVERSE LENGTH=1547                                                                                                                                             |
| AT1G26940 | CAAAUUCGAGAACUCCUUGAG  | 283  | 3.5 Translation | [ Symbols:   Cyclophilin-like peptidyl-prolyl cis trans isomerase family protein   chr1:9343126-9345145 FORWARD LENGTH=931                                                                                                                             |
| AT1G27050 | UAGAUAUUUAUUGUUGGCG    | 138  | 3.5 Cleavage    | [ Symbols:   ATHB54, HB54   homeobox protein 54   chr1:9393690-9394592 FORWARD LENGTH=818                                                                                                                                                              |
| AT1G27080 | AACAACCAUGUGUAACAAGCU  | 111  | 4 Cleavage      | [ Symbols:   NRT1.6   nitrate transporter 1.6   chr1:9400664-9403789 FORWARD LENGTH=1731                                                                                                                                                               |
| AT1G27190 | UAUCUCUGAGAGCGGUGCUGCG | 334  | 4 Cleavage      | [ Symbols:   Leucine-rich repeat protein kinase family protein   chr1:9446657-9448825 REVERSE LENGTH=2169                                                                                                                                              |
| AT1G27240 | UUGAAAGACUUGUGGUAACCC  | 926  | 3 Cleavage      | [ Symbols:   Paired amphipathic helix (PAH2) superfamily protein   chr1:9466237-9467076 FORWARD LENGTH=561                                                                                                                                             |
| AT1G27260 | UUCUGAAGGACAAACGCUACAG | 1012 | 4 Cleavage      | [ Symbols:   Paired amphipathic helix (PAH2) superfamily protein   chr1:9469948-9470967 FORWARD LENGTH=669                                                                                                                                             |
| AT1G27340 | UCAUCUUCUUGUAGCUUCGUC  | 210  | 3 Cleavage      | [ Symbols:   Galactose oxidase/keich repeat superfamily protein   chr1:9495520-9498085 FORWARD LENGTH=1853                                                                                                                                             |
| AT1G27595 | UUUCUACAGACUUGUAAGGACU | 265  | 2.5 Translation | [ Symbols:   CONTAINS InterPro DOMAIN5: Symplekin tight junction protein C-terminal (InterPro:IPR022075); BEST Arabidopsis thaliana protein match is: HEAT repeat-containing protein (TAIR:AT5G01400.1); Has 593 Blast hits to 297 proteins in         |
| AT1G27690 | UUUGGGUUGGGUUAACUGCU   | 225  | 3 Cleavage      | [ Symbols:   Protein of unknown function (DUF620)   chr1:9636594-9638577 FORWARD LENGTH=1659                                                                                                                                                           |
| AT1G27750 | UGAAUUGUGGCUACUGGACC   | 197  | 4.5 Cleavage    | [ Symbols:   nucleic acid binding   chr1:9657385-9661958 FORWARD LENGTH=3476                                                                                                                                                                           |
| AT1G27940 | UAACUUCUACCCUUGUACUGC  | 727  | 2.5 Cleavage    | [ Symbols:   PGP13   P-glycoprotein 13   chr1:9733597-9738129 REVERSE LENGTH=3738                                                                                                                                                                      |
| AT1G28050 | UUUGGCUUGGAGUGGAGCGCC  | 367  | 3 Cleavage      | [ Symbols:   B-box type zinc finger protein with CCT domain   chr1:9775528-9777810 REVERSE LENGTH=1695                                                                                                                                                 |
| AT1G28090 | CGGAUUCUGAUUGCAUGUGGU  | 186  | 4 Cleavage      | [ Symbols:   Polynucleotide adenyllyltransferase family protein   chr1:9796153-9799063 FORWARD LENGTH=1692                                                                                                                                             |
| AT1G28240 | AAACAGGACAAUGUACUGGCC  | 986  | 3.5 Translation | [ Symbols:   Protein of unknown function (DUF616)   chr1:9868316-9872211 REVERSE LENGTH=2364                                                                                                                                                           |
| AT1G28375 | UUUAUCUGCAGUAAGUCCUG   | 314  | 2.5 Cleavage    | [ Symbols:   unknown protein; FUNCTIONS IN: molecular_function unknown; INVOLVED IN: biological_process unknown; LOCATED IN: endomembrane system; EXPRESSED IN: petal, leaf whorl, sepal, flower; EXPRESSED DURING: 4 anthesis, petal                  |
| AT1G28410 | UCUAUUGUUGUUGUUGUACAGC | 101  | 5 Cleavage      | [ Symbols:   FUNCTIONS IN: molecular_function unknown; INVOLVED IN: biological_process unknown; LOCATED IN: endomembrane system; EXPRESSED IN: 23 plant structures; EXPRESSED DURING: 15 growth stages; BEST Arabidopsis thaliana pi                   |
| AT1G28680 | UCUAGUUGCGUUCUUCUACAGC | 300  | 4.5 Cleavage    | [ Symbols:   HXXXD-type acyl-transferase family protein   chr1:10078189-10080020 FORWARD LENGTH=1655                                                                                                                                                   |
| AT1G29050 | UAGGUCACUGCGAAUUCUGGA  | 271  | 5 Translation   | [ Symbols:   TBL38   TRICHOME BIREFRINGENCE-LIKE 38   chr1:10136230-10139208 REVERSE LENGTH=1415                                                                                                                                                       |
| AT1G29390 | UGUGACACCGAUUCUAGUUGCG | 114  | 3.5 Cleavage    | [ Symbols:   COR314-TM2, COR413M2   cold regulated 314 thylakoid membrane 2   chr1:10286293-10287904 REVERSE LENGTH=823                                                                                                                                |
| AT1G29400 | CUCAACAUGUAUUAUGGCGU   | 208  | 4 Translation   | [ Symbols:   AML5, MLS   MEI2-like protein 5   chr1:10290040-10294478 REVERSE LENGTH=2880                                                                                                                                                              |
| AT1G29560 | UCCUGAGUACUCUUCUCCAAG  | 209  | 3 Cleavage      | [ Symbols:   Zinc finger Cx8-Cx5-Cx3-H type family protein   chr1:10332371-10335694 FORWARD LENGTH=2179                                                                                                                                                |
| AT1G29570 | UCCUGAGUACUCUUCUCCAAG  | 209  | 2 Cleavage      | [ Symbols:   Zinc finger Cx8-Cx5-Cx3-H type family protein   chr1:10335910-10337854 FORWARD LENGTH=966                                                                                                                                                 |
| AT1G29700 | UCCACUCGCAUCUUGAAGACUG | 146  | 5 Translation   | [ Symbols:   Metallo-hydrolase/oxidoreductase superfamily protein   chr1:10384981-10387441 REVERSE LENGTH=1356                                                                                                                                         |
| AT1G29750 | CGGAGGAAACUAGCAGCGCC   | 103  | 3.5 Cleavage    | [ Symbols:   RKF1   receptor-like kinase in flowers 1   chr1:10413881-10420524 REVERSE LENGTH=3311                                                                                                                                                     |
| AT1G30290 | UGUGUAUGCAUUAACUUGGCG  | 106  | 4 Cleavage      | [ Symbols:   Tetra201-like repeat (TPR)-like superfamily protein   chr1:10670320-10672740 REVERSE LENGTH=2421                                                                                                                                          |
| AT1G30410 | UACCCUGUAGUGCUUACAAG   | 3223 | 4.5 Translation | [ Symbols:   ATMRP13, MRP13, ABC12   multidrug resistance-associated protein 13   chr1:10738805-10747323 FORWARD LENGTH=4827                                                                                                                           |
| AT1G30420 | UACCCGUAUGUGCUUACAAG   | 3223 | 4.5 Translation | [ Symbols:   ATMRP12, MRP12, ABC11   multidrug resistance-associated protein 12   chr1:10748816-10756316 FORWARD LENGTH=4488                                                                                                                           |
| AT1G30450 | AAACAGGACAAAGUACUCGCC  | 986  | 3.5 Cleavage    | [ Symbols:   CCC1, ATCC1, HAP5   cation-chloride co-transporter 1   chr1:10762739-10769227 FORWARD LENGTH=3260                                                                                                                                         |
| AT1G30470 | UUUAUACCAAGUAGCUGACUCU | 2805 | 3.5 Cleavage    | [ Symbols:   S1T4 phosphatase-associated family protein   chr1:10779213-10786697 FORWARD LENGTH=2799                                                                                                                                                   |
| AT1G30490 | UUUGGUCUGGGCAUUCGCGG   | 147  | 4 Translation   | [ Symbols:   PHV, ATHB9   Homeobox-leucine zipper family protein / lipid-binding START domain-containing protein   chr1:10796135-10800961 REVERSE LENGTH=2936                                                                                          |
| AT1G30600 | UCGCUAGUAUUAUUAACUUG   | 281  | 3.5 Translation | [ Symbols:   Subtilase family protein   chr1:10841142-10845050 REVERSE LENGTH=2842                                                                                                                                                                     |
| AT1G30620 | UAGCAUUAUUAUGUUAACGAGC | 300  | 5 Cleavage      | [ Symbols:   HX58, MJR4, LXE1   NAD(P)-binding Rossmann-fold superfamily protein   chr1:10854549-10858244 FORWARD LENGTH=1922                                                                                                                          |
| AT1G30660 | CGUCACUGCGAAUUCUGGAG   | 272  | 5 Translation   | [ Symbols:   nucleic acid binding/nucleic acid binding   chr1:10876853-10879017 FORWARD LENGTH=1014                                                                                                                                                    |
| AT1G30690 | UACACUCGCAUCUUGAAGACUG | 146  | 4.5 Cleavage    | [ Symbols:   Sec14p-like phosphatidylinositol transfer family protein   chr1:10887705-10890315 FORWARD LENGTH=1984                                                                                                                                     |
| AT1G30710 | UCUGGGUAUGUUGGGAUUAUAC | 123  | 3.5 Cleavage    | [ Symbols:   FAD-binding Berberine family protein   chr1:10895280-10897109 FORWARD LENGTH=1830                                                                                                                                                         |
| AT1G30825 | CGUCACUGCGAAUUCUGGAG   | 272  | 4.5 Cleavage    | [ Symbols:   ARP2CA, DIS2   Arp2/3 complex, 34 kD subunit p34-Arc   chr1:10960941-10963182 FORWARD LENGTH=1305                                                                                                                                         |
| AT1G30870 | UUUCCGUUGGUGUGGCGCCAC  | 458  | 3.5 Cleavage    | [ Symbols:   Peroxidase superfamily protein   chr1:10991485-10993023 FORWARD LENGTH=1238                                                                                                                                                               |
| AT1G30925 | UGAAGGAUUUGGUGUAUACCA  | 474  | 3.5 Translation | [ Symbols:   phospholipase Cs   chr1:11009888-11011792 REVERSE LENGTH=1125                                                                                                                                                                             |
| AT1G30950 | UGAAUUCUGUACUACUGGACC  | 197  | 4 Cleavage      | [ Symbols:   UFO   F-box family protein   chr1:11036180-11037508 FORWARD LENGTH=1329                                                                                                                                                                   |
| AT1G31040 | UUGAAGGACACUACCGACUGA  | 140  | 5 Cleavage      | [ Symbols:   PLAT2 transcription factor family protein   chr1:11069793-11072291 REVERSE LENGTH=841                                                                                                                                                     |
| AT1G31260 | UGUCUUACCGGUACGUCGUCU  | 150  | 5 Cleavage      | [ Symbols:   ZIP10   zinc transporter 10 precursor   chr1:11175559-11177362 REVERSE LENGTH=1095                                                                                                                                                        |
| AT1G31490 | UUGGAGAACUCCUGACCGCA   | 1272 | 4 Translation   | [ Symbols:   HXXXD-type acyl-transferase family protein   chr1:11271228-11273294 REVERSE LENGTH=2067                                                                                                                                                   |
| AT1G31500 | UGUGGAUUAACAAGCUGGGCU  | 215  | 3.5 Translation | [ Symbols:   DNase I-like superfamily protein   chr1:11273605-11276577 REVERSE LENGTH=1426                                                                                                                                                             |
| AT1G31540 | UCUCAUGUAGUUAUGUUGCGG  | 207  | 4 Translation   | [ Symbols:   Disease resistance protein (TIR-NBS-LRR class) family   chr1:11290948-11293753 REVERSE LENGTH=2490                                                                                                                                        |
| AT1G31670 | UAUGCAAUUGUUUUGACGCCU  | 113  | 5 Cleavage      | [ Symbols:   Copper amine oxidase family protein   chr1:11337558-11341889 FORWARD LENGTH=2226                                                                                                                                                          |
| AT1G31710 | UAUGAGAUUAUGCAAGAGAU   | 123  | 4 Cleavage      | [ Symbols:   Copper amine oxidase family protein   chr1:11349840-11355486 FORWARD LENGTH=2208                                                                                                                                                          |
| AT1G31780 | CAUUAUUAUUAUGUUAACGAGU | 190  | 4.5 Cleavage    | [ Symbols:   CONTAINS InterPro DOMAIN5: Conserved oligomeric complex COG5 (InterPro:IPR010490); Has 384 Blast hits to 379 proteins in 190 species: Archae - 0; Bacteria - 4; Metazoa - 151; Fungi - 156; Plants - 42; Viruses - 0; Other Eukaryot      |
| AT1G31910 | UGAAUAUUAACUACACCAAGC  | 263  | 4.5 Cleavage    | [ Symbols:   GHMP kinase family protein   chr1:114657127-11461825 FORWARD LENGTH=2442                                                                                                                                                                  |
| AT1G31930 | UCUAGUCCGAAAUAUGGCAAG  | 163  | 5 Cleavage      | [ Symbols:   XLG3   extra-large GTP-binding protein 3   chr1:11465014-11469165 FORWARD LENGTH=3040                                                                                                                                                     |
| AT1G31960 | UUGAAAGACUUGUGUAACACC  | 926  | 3.5 Cleavage    | [ Symbols:   unknown protein; Has 4 Blast hits to 4 proteins in 2 species: Archae - 0; Bacteria - 0; Metazoa - 0; Fungi - 0; Plants - 4; Viruses - 0; Other Eukaryotes - 0 (source: NCBI BLink).   chr1:11479133-11479654 REVERSE LENGTH=522           |
| AT1G32430 | UCAUCALUAUAAUUAUUGGCU  | 103  | 2.5 Cleavage    | [ Symbols:   F-box and associated interaction domains-containing protein   chr1:11704932-11706325 REVERSE LENGTH=1143                                                                                                                                  |
| AT1G32550 | UAUAUAGGAGAGUACGACUACU | 298  | 4 Cleavage      | [ Symbols:   FdCI   2Fe-2S ferredoxin-like superfamily protein   chr1:11717166-11774187 REVERSE LENGTH=819                                                                                                                                             |
| AT1G32585 | UUGAACAAGCGUGAUGAUGU   | 102  | 3 Translation   | [ Symbols:   VQ motif-containing protein-related   chr1:11788515-11789177 REVERSE LENGTH=663                                                                                                                                                           |
| AT1G32600 | AUCCAAGUAGCUGACUCUCCU  | 1104 | 5 Cleavage      | [ Symbols:   F-box associated ubiquitination effector family protein   chr1:11794802-11795683 FORWARD LENGTH=882                                                                                                                                       |
| AT1G32740 | UUUUUUUCCGUUGUGUGCGGCC | 205  | 4.5 Cleavage    | [ Symbols:   SBP (S-ribonuclease binding protein) family protein   chr1:11844877-11846347 FORWARD LENGTH=1210                                                                                                                                          |
| AT1G32810 | UGACUGCGAGUUAUGGCGUGA  | 116  | 5 Cleavage      | [ Symbols:   RING/YFVE/PHD zinc finger superfamily protein   chr1:11881810-11885843 FORWARD LENGTH=3207                                                                                                                                                |
| AT1G33060 | UAUUGAUUUUUUGGCCUGAGGU | 416  | 4.5 Cleavage    | [ Symbols:   ANAC014, NAC014   NAC O14   chr1:11975340-11978521 REVERSE LENGTH=2153                                                                                                                                                                    |
| AT1G33070 | UGUCUUACCGGUACGUCGCU   | 150  | 3.5 Cleavage    | [ Symbols:   MADS-box family protein   chr1:11982889-11985299 FORWARD LENGTH=498                                                                                                                                                                       |
| AT1G33220 | UGAAGGACAAAGUACGUCGU   | 415  | 3.5 Cleavage    | [ Symbols:   Glycosyl hydrolase superfamily protein   chr1:12044872-12045879 FORWARD LENGTH=1008                                                                                                                                                       |
| AT1G33270 | UUUGAUUGCAUGUGUGGUUAC  | 110  | 4.5 Translation | [ Symbols:   Acyl transferase/acyl hydrolase/lysophospholipase superfamily protein   chr1:12068063-12070374 REVERSE LENGTH=1588                                                                                                                        |
| AT1G33280 | UUUGAGCACUCUACACAGAG   | 162  | 2 Cleavage      | [ Symbols:   ANAC015, BRN1, NAC015   NAC domain containing protein 15   chr1:12072741-12073839 FORWARD LENGTH=924                                                                                                                                      |
| AT1G33350 | CGGAGAUUAACAGGACUGUC   | 3198 | 4.5 Cleavage    | [ Symbols:   Pentatricopeptide repeat (PPR) superfamily protein   chr1:12089403-12091687 REVERSE LENGTH=2285                                                                                                                                           |
| AT1G33475 | CUUCGUAUUAUUCUUCUCC    | 401  | 4 Cleavage      | [ Symbols:   SNARE-like superfamily protein   chr1:12147276-12148249 REVERSE LENGTH=974                                                                                                                                                                |
| AT1G33920 | UCCGCUAGUAUUAUUAACUUG  | 281  | 5 Cleavage      | [ Symbols:   ATP2-A4, PP2-A4   phospho protein 2-A4   chr1:12319905-12320870 FORWARD LENGTH=498                                                                                                                                                        |
| AT1G33990 | CUAGAAUUCUUCUCCUUAUCCU | 235  | 3 Translation   | [ Symbols:   ATMES14, MES14   methyl esterase 14   chr1:12355568-12358031 FORWARD LENGTH=1525                                                                                                                                                          |
| AT1G34020 | UUUCUACGCGACAAAGUAAGU  | 480  | 4 Cleavage      | [ Symbols:   Nucleotide-sugar transporter family protein   chr1:12366854-12369178 FORWARD LENGTH=1463                                                                                                                                                  |

|           |                         |      |     |             |                                                                                                                                                                                                                                                              |
|-----------|-------------------------|------|-----|-------------|--------------------------------------------------------------------------------------------------------------------------------------------------------------------------------------------------------------------------------------------------------------|
| AT1G34042 | UUUCUACAGACUGGAUAGACU   | 265  | 4   | Cleavage    | [ Symbols:   unknown protein; Has 30201 Blast hits to 17322 proteins in 780 species: Archae - 12; Bacteria - 1396; Metazoa - 17338; Fungi - 3422; Plants - 5037; Viruses - 0; Other Eukaryotes - 2996 (source: NCBI BLink). ] chr1:12379427-1237968          |
| AT1G34050 | CAACUACACACGAGGGACU     | 198  | 3.5 | Cleavage    | [ Symbols:   Ankyrin repeat family protein   chr1:12393495-12396006 FORWARD LENGTH=1722                                                                                                                                                                      |
| AT1G34060 | UGAAUUCUGGUAACUUGGACC   | 197  | 3.5 | Translation | [ Symbols:   Pyridoxal phosphate (PLP)-dependent transferases superfamily protein   chr1:12396420-12398369 REVERSE LENGTH=1603                                                                                                                               |
| AT1G34140 | AUACCCAAACUIGAAUUUCU    | 127  | 5   | Cleavage    | [ Symbols:   PAB1   poly(A) binding protein 1   chr1:12433356-12434735 REVERSE LENGTH=1224                                                                                                                                                                   |
| AT1G34160 | UCACUGUGAAUUCUGGGAGUU   | 123  | 4   | Cleavage    | [ Symbols:   Tetraaricopeptide repeat (TPR)-like superfamily protein   chr1:12441393-12443256 FORWARD LENGTH=1777                                                                                                                                            |
| AT1G34170 | UUUAGCCUGAGGUUGGACGCC   | 213  | 4.5 | Translation | [ Symbols:   ARF13   AUXIN RESPONSE FACTOR 13   chr1:12443578-12446764 REVERSE LENGTH=1641                                                                                                                                                                   |
| AT1G34180 | UGAGAGAUUCGCUUUAUCUGA   | 786  | 4   | Translation | [ Symbols:   anac017, NAC016   NAC domain containing protein 16   chr1:12448726-12451287 FORWARD LENGTH=1898                                                                                                                                                 |
| AT1G34190 | AUCACUACCGGUAACAAACCU   | 222  | 4   | Cleavage    | [ Symbols:   anac017, NAC017   NAC domain containing protein 17   chr1:12451451-12454142 FORWARD LENGTH=2180                                                                                                                                                 |
| AT1G34260 | UCUAAUGCGAAUUGACUUCU    | 106  | 4.5 | Cleavage    | [ Symbols:   FBAD1   FORMAS APLCID AND BINUCLEATE CELLS 1A   chr1:12485967-12492169 FORWARD LENGTH=4741                                                                                                                                                      |
| AT1G34320 | UAAGGAGAGUCAGCUACUUGGA  | 134  | 2.5 | Cleavage    | [ Symbols:   Protein of unknown function (DUF668)   chr1:12520179-12524370 FORWARD LENGTH=2718                                                                                                                                                               |
| AT1G34380 | UCAUCAUUGAACUACUUGGCU   | 103  | 3   | Cleavage    | [ Symbols:   5'-3' exonuclease family protein   chr1:12552670-12554358 REVERSE LENGTH=1272                                                                                                                                                                   |
| AT1G34520 | UGAAUUCUGGUAACUUGGACC   | 197  | 4   | Translation | [ Symbols:   MBOAT (membrane bound O-acyl transferase) family protein   chr1:12623477-12624487 FORWARD LENGTH=1011                                                                                                                                           |
| AT1G34770 | UGGGCGUACACUCUGCAAGGUC  | 119  | 4   | Translation | [ Symbols:   CONTAINS InterPro DOMAIN/s: MAGE protein (InterPro:IPR002190); Has 1274 Blast hits to 1260 proteins in 85 species: Archae - 0; Bacteria - 0; Metazoa - 1104; Fungi - 45; Plants - 49; Viruses - 0; Other Eukaryotes - 76 (source: NCBI BLink) ] |
| AT1G35160 | UGUGAUGCAUAAUUCUGGGAC   | 106  | 4   | Cleavage    | [ Symbols:   GF14 PH   GF14 protein ph1 chain   chr1:12867126-12868890 FORWARD LENGTH=1402                                                                                                                                                                   |
| AT1G35190 | UUUAGAAGUACCCUUGUUAUCU  | 387  | 4.5 | Cleavage    | [ Symbols:   2-oxoglutarate (2OG) and FeII)-dependent oxygenase superfamily protein   chr1:12890423-12892874 FORWARD LENGTH=1284                                                                                                                             |
| AT1G35220 | UCACAUUGGGCAGUCUGUACCC  | 187  | 2.5 | Cleavage    | [ Symbols:   unknown protein; FUNCTIONS IN: molecular_function unknown; INVOLVED IN: biological_process unknown; LOCATED IN: cellular_component unknown; EXPRESSED IN: 22 plant structures; EXPRESSED DURING: 13 growth stages; Has                          |
| AT1G35255 | UAGCUACAAGAACUUCUUUCU   | 1828 | 4   | Cleavage    | [ Symbols:   unknown protein; Has 3 Blast hits to 3 proteins in 1 species: Archae - 0; Bacteria - 0; Metazoa - 0; Fungi - 0; Plants - 3; Viruses - 0; Other Eukaryotes - 0 (source: NCBI BLink). ] chr1:12935647-12936553 REVERSE LENGTH=907                 |
| AT1G35435 | UGACUCGCGUAGGUCUGGCAG   | 378  | 3.5 | Cleavage    | [ Symbols:   Putative membrane lipoprotein   chr1:13032806-13033247 REVERSE LENGTH=249                                                                                                                                                                       |
| AT1G35460 | UUAAUUCAGUAGUCGACUCU    | 2805 | 4.5 | Cleavage    | [ Symbols:   basic helix-loop-helix (bHLH) DNA-binding superfamily protein   chr1:13039916-13042102 FORWARD LENGTH=1151                                                                                                                                      |
| AT1G35550 | CAACGUCUGUAGUACUACUAG   | 133  | 3   | Cleavage    | [ Symbols:   elongation factor Tu C-terminal domain-containing protein   chr1:13112506-13113136 FORWARD LENGTH=631                                                                                                                                           |
| AT1G35660 | CAAAUCGGACAGCUACUUCU    | 324  | 3.5 | Translation | [ Symbols:   unknown protein; FUNCTIONS IN: molecular_function unknown; INVOLVED IN: biological_process unknown; LOCATED IN: plasma membrane; EXPRESSED IN: 19 plant structures; EXPRESSED DURING: 11 growth stages; Has 309 Blast I                         |
| AT1G35750 | UUUGUAGUCAGAGGUAUCUGU   | 302  | 2.5 | Cleavage    | [ Symbols:   AUPM10, PUM10   pumilio 10   chr1:13253398-13255750 REVERSE LENGTH=1587                                                                                                                                                                         |
| AT1G35780 | UCACUACGAGUACUAGUACUG   | 146  | 4.5 | Cleavage    | [ Symbols:   unknown protein; BEST Arabidopsis thaliana protein match is: unknown protein (TAIR:AT1G78150.2); Has 145 Blast hits to 144 proteins in 16 species: Archae - 0; Bacteria - 0; Metazoa - 0; Fungi - 0; Plants - 145; Viruses - 0; Other Euk       |
| AT1G36090 | UGUUAUGACAGUACUAGCCACA  | 574  | 4.5 | Cleavage    | [ Symbols:   unknown protein; LOCATED IN: chloroplast; EXPRESSED IN: 24 plant structures; EXPRESSED DURING: 14 growth stages; BEST Arabidopsis thaliana protein match is: unknown protein (TAIR:ATG08510.1); Has 5029 Blast hits to 1779 p                   |
| AT1G37020 | UAUCUUCACGGUUUCUGAGGCC  | 826  | 3.5 | Cleavage    | [ Symbols:   Cysteine proteinases superfamily protein   chr1:14046735-14049742 FORWARD LENGTH=1836                                                                                                                                                           |
| AT1G42440 | UACGGCACCCGGGUCUGGCC    | 119  | 3.5 | Cleavage    | [ Symbols:   FUNCTIONS IN: molecular_function unknown; INVOLVED IN: ribosome biogenesis; LOCATED IN: nucleus; EXPRESSED IN: 22 plant structures; EXPRESSED DURING: 13 growth stages; CONTAINS InterPro DOMAIN/s: AARP2CN (InterPro:                          |
| AT1G42490 | UUGAGGCGCUACUACUAGAGA   | 69   | 4   | Cleavage    | [ Symbols:   pseudogene, glutamate dehydrogenase (fragment), blastp match of 78% identity and 1.6e-94 P-value to GP15004984 (db)   BA062170.1     AB066298 glutamate dehydrogenase (Brassica napus)   chr1:15945877-15946985 REVERSE LI                      |
| AT1G42560 | UCUAGUUCGGCUUUUUCAGAC   | 163  | 4   | Translation | [ Symbols:   MLO9, ATML09   Seven transmembrane MLO family protein   chr1:1580135-1598328 REVERSE LENGTH=1457                                                                                                                                                |
| AT1G43640 | UAUCUCUGUCCUACUACUAGAG  | 295  | 3.5 | Translation | [ Symbols:   ATLPS1, TLP5   tubby like protein 5   chr1:16439435-16441844 REVERSE LENGTH=1594                                                                                                                                                                |
| AT1G43895 | AAACAGGACAAGUUAUCUGGCC  | 986  | 3.5 | Cleavage    | [ Symbols:   pseudogene, protein kinase -related   chr1:16648567-16649643 REVERSE LENGTH=1077                                                                                                                                                                |
| AT1G44110 | UAUGAGUUGAUUGGACAGAGA   | 123  | 4.5 | Cleavage    | [ Symbols:   CYCA1;1   Cyclin A1;1   chr1:16774865-16777247 REVERSE LENGTH=1618                                                                                                                                                                              |
| AT1G44575 | UUAGAUAUCCUUGUUAUCUAG   | 141  | 4   | Translation | [ Symbols:   NPQ4, PSB5   Chlorophyll A-B binding family protein   chr1:16871696-16873378 FORWARD LENGTH=1520                                                                                                                                                |
| AT1G44740 | UGUGGUUACCUUCUACACUCU   | 112  | 5   | Cleavage    | [ Symbols:   unknown protein; FUNCTIONS IN: molecular_function unknown; INVOLVED IN: biological_process unknown; LOCATED IN: mitochondrion; EXPRESSED IN: embryo, leaf whorl, flower, seed; EXPRESSED DURING: F mature embryo stage                          |
| AT1G44810 | UUUCUACAGACUGGAUAGGACU  | 265  | 3   | Cleavage    | [ Symbols:   DNA-binding storekeeper protein-related transcriptional regulator   chr1:16923543-16924821 FORWARD LENGTH=1279                                                                                                                                  |
| AT1G44890 | CCACCGACUAGUACAGCAUCUC  | 122  | 4.5 | Cleavage    | [ Symbols:   BEST Arabidopsis thaliana protein match is: homolog of yeast oxidase assembly 1 (OXA1) (TAIR:ATSG62050.1); Has 40 Blast hits to 40 proteins in 7 species: Archae - 0; Bacteria - 0; Metazoa - 0; Fungi - 0; Plants - 39; Viruses - 0; Other I   |
| AT1G45150 | UAUGCAGCACCUACGUACUACU  | 123  | 3.5 | Cleavage    | [ Symbols:   unknown protein; Has 219 Blast hits to 202 proteins in 78 species: Archae - 0; Bacteria - 166; Metazoa - 0; Fungi - 0; Plants - 36; Viruses - 0; Other Eukaryotes - 17 (source: NCBI BLink). ] chr1:17077448-17082503 REVERSE LENGTH=22         |
| AT1G45170 | UCAAGCGAUUGGAGGAUUUGUU  | 102  | 3   | Cleavage    | [ Symbols:   unknown protein; FUNCTIONS IN: molecular_function unknown; INVOLVED IN: biological_process unknown; LOCATED IN: cellular_component unknown; EXPRESSED IN: 24 plant structures; EXPRESSED DURING: 13 growth stages; BE                           |
| AT1G46264 | UGAGCCGACAAGAGUAGUUAUC  | 111  | 5   | Cleavage    | [ Symbols:   AT-HSF84, HSF84, SCZ   heat shock transcription factor B4   chr1:17224842-17226280 FORWARD LENGTH=1206                                                                                                                                          |
| AT1G47056 | UUCCGUGUUCUUGUAGGCAAC   | 156  | 4.5 | Translation | [ Symbols:   VFB1   VIEF F box protein 1   chr1:17276103-17277659 REVERSE LENGTH=1557                                                                                                                                                                        |
| AT1G47260 | UCUGUGUAGUUGGGAUUAUUC   | 123  | 4   | Cleavage    | [ Symbols:   APF1, GAMMA C42   gamma carbonic anhydrase 2   chr1:17321173-17323484 REVERSE LENGTH=1185                                                                                                                                                       |
| AT1G47330 | UUUCUUGUAGACAGAGGUUAUCU | 302  | 3   | Cleavage    | [ Symbols:   CBS domain-containing protein with a domain of unknown function (DUF21)   chr1:17351050-17353875 FORWARD LENGTH=1819                                                                                                                            |
| AT1G47370 | UGAGAUAUUGUACUACAGACUC  | 158  | 5   | Cleavage    | [ Symbols:   Toll-interleukin-Resistance (TIR) domain family protein   chr1:17365898-17368703 REVERSE LENGTH=1092                                                                                                                                            |
| AT1G47380 | CCACGCAUUGAUGACAACGUCU  | 122  | 4   | Cleavage    | [ Symbols:   Protein phosphatase 2C family protein   chr1:17372537-17376075 REVERSE LENGTH=2046                                                                                                                                                              |
| AT1G47600 | UGAAGGACAAGUACAGCUGUCU  | 415  | 3.5 | Cleavage    | [ Symbols:   BGLU34   beta glucosidase 34   chr1:17491732-17494754 FORWARD LENGTH=1737                                                                                                                                                                       |
| AT1G47610 | AUUUGACAUCAUGGAUACCCU   | 768  | 3.5 | Cleavage    | [ Symbols:   Transducin/WD40 repeat-like superfamily protein   chr1:17504783-17505964 FORWARD LENGTH=1182                                                                                                                                                    |
| AT1G47625 | UCGGCUCAACAUACACAGCUU   | 129  | 3.5 | Cleavage    | [ Symbols:   pseudogene of seven transmembrane domain protein   chr1:17510810-17511489 REVERSE LENGTH=471                                                                                                                                                    |
| AT1G47630 | UACACGAACUUCUUGGCCCUAGA | 152  | 4   | Translation | [ Symbols:   CYP96A7   member of CYP96A   chr1:17516249-17517850 REVERSE LENGTH=1602                                                                                                                                                                         |
| AT1G47640 | UCGGCUCAACAUACACAGCUU   | 129  | 3.5 | Cleavage    | [ Symbols:   unknown protein; FUNCTIONS IN: molecular_function unknown; INVOLVED IN: biological_process unknown; LOCATED IN: mitochondrion; EXPRESSED IN: 23 plant structures; EXPRESSED DURING: 13 growth stages; CONTAINS InterPr                          |
| AT1G47750 | UAUGAGUUAUGUACGACAGAGA  | 123  | 3.5 | Translation | [ Symbols:   PEX11A   peroxin 11A   chr1:17569256-17570159 REVERSE LENGTH=904                                                                                                                                                                                |
| AT1G47840 | UUUCUAGUUGCAUGUGGUUACCC | 110  | 4.5 | Cleavage    | [ Symbols:   HXK3   hexokinase 3   chr1:17616107-17618894 REVERSE LENGTH=1653                                                                                                                                                                                |
| AT1G47890 | UGAGAUUGUCAGAGAAAGAAC   | 101  | 3.5 | Cleavage    | [ Symbols:   ARLP7, RL7P   receptor like protein 7   chr1:17643976-17647035 FORWARD LENGTH=3060                                                                                                                                                              |
| AT1G47970 | UCCUGAGUACUUCUUCUACGAG  | 209  | 4.5 | Cleavage    | [ Symbols:   unknown protein; FUNCTIONS IN: molecular_function unknown; INVOLVED IN: biological_process unknown; LOCATED IN: cytosol; EXPRESSED IN: 21 plant structures; EXPRESSED DURING: 11 growth stages; Has 93717 Blast hits to 40                      |
| AT1G47990 | CUUUGACAUCAUGAAUUCUUUC  | 119  | 3.5 | Translation | [ Symbols:   ATGA20X4, GA20X4   gbbberellin 2-oxidase 4   chr1:17698655-17700834 FORWARD LENGTH=966                                                                                                                                                          |
| AT1G48020 | UUUCUAGUUGCAUGUGUUGUACC | 110  | 4.5 | Translation | [ Symbols:   PME11, ATPME11   pectin methyltransferase inhibitor 1   chr1:17716051-17716808 REVERSE LENGTH=758                                                                                                                                               |
| AT1G48090 | UAUUGUACUUGUAGUUGUUCU   | 152  | 4.5 | Cleavage    | [ Symbols:   calcium dependent lipid-binding family protein   chr1:17732010-17758484 REVERSE LENGTH=2295                                                                                                                                                     |
| AT1G48120 | UUUAUCUUAACCUUUUGACUAC  | 380  | 4   | Cleavage    | [ Symbols:   hydrolases;protein serine/threonine phosphatases   chr1:17776688-17779955 REVERSE LENGTH=4346                                                                                                                                                   |
| AT1G48150 | UGAAGGACAAGAUACAGCUGUC  | 415  | 4   | Cleavage    | [ Symbols:   MAD5-box transcription factor family protein   chr1:17785397-17786368 FORWARD LENGTH=972                                                                                                                                                        |
| AT1G48175 | UUCCGACAGCAUJAGUAUGUUA  | 448  | 4.5 | Cleavage    | [ Symbols:   emb2191   Cytidine/deoxycytidylate deaminase family protein   chr1:17790507-17792331 FORWARD LENGTH=890                                                                                                                                         |
| AT1G48360 | UUUGAAUUCUAGUUAACCCUUA  | 227  | 3.5 | Cleavage    | [ Symbols:   zinc ion binding;nucleic acid binding;hydrolases, acting on acid anhydrides, in phosphorus-containing anhydrides   chr1:17868650-17873032 FORWARD LENGTH=2707                                                                                   |
| AT1G48400 | UGCAUAUUCUGGGGACUUAUCU  | 413  | 5   | Cleavage    | [ Symbols:   F-box/RN1-like/FBD-like domains-containing protein   chr1:17882136-17883855 REVERSE LENGTH=1542                                                                                                                                                 |
| AT1G48460 | CGGAUAUCUAGUUGCAUUGGCU  | 186  | 4   | Translation | [ Symbols:   unknown protein; FUNCTIONS IN: molecular_function unknown; INVOLVED IN: biological_process unknown; LOCATED IN: chloroplast envelope; EXPRESSED IN: 21 plant structures; EXPRESSED DURING: 13 growth stages; BEST Arabid                        |
| AT1G48540 | UGACGGCAAUUCUGAAAGUUU   | 154  | 4.5 | Cleavage    | [ Symbols:   Outer arm dynein light chain 1 protein   chr1:17945376-17950521 FORWARD LENGTH=3436                                                                                                                                                             |
| AT1G48650 | UUUCUUGACUGAGGUUAAGCGCC | 154  | 3.5 | Cleavage    | [ Symbols:   DEA(D/H)-box RNA helicase family protein   chr1:17989398-17995326 REVERSE LENGTH=3897                                                                                                                                                           |
| AT1G48670 | UUUGUGGAUUCGUAGUCUGUUA  | 152  | 4   | Cleavage    | [ Symbols:   auxin-responsive GH3 family protein   chr1:17998946-18001200 REVERSE LENGTH=1578                                                                                                                                                                |
| AT1G48820 | UACACAAGGGCUCUUGCAGCC   | 211  | 3.5 | Cleavage    | [ Symbols:   Terpenoid cyclases/Protein prenyltransferases superfamily protein   chr1:18055229-18059367 FORWARD LENGTH=1686                                                                                                                                  |
| AT1G48830 | UCUGUACCCGUGAAUUCUUUCC  | 275  | 4   | Cleavage    | [ Symbols:   Ribosomal protein S7e family protein   chr1:18059636-18061257 REVERSE LENGTH=837                                                                                                                                                                |
| AT1G48930 | CAAAUUCGAGAACUUCUUGAC   | 283  | 3.5 | Cleavage    | [ Symbols:   ATGH9C1, GH9C1   glycosyl hydrolase 9C1   chr1:18101643-18104661 REVERSE LENGTH=2097                                                                                                                                                            |
| AT1G48980 | UUUUAAUUCAGUAGUCUACU    | 133  | 3   | Cleavage    | [ Symbols:   2-oxoglutarate (2OG) and FeII)-dependent oxygenase superfamily protein   chr1:18118017-18120647 FORWARD LENGTH=1745                                                                                                                             |
| AT1G49110 | UCCGAUUCGAGAGGUCGUCU    | 164  | 5   | Cleavage    | [ Symbols:   B-box type zinc finger protein with CCT domain   chr1:18174740-181752564 REVERSE LENGTH=1010                                                                                                                                                    |
| AT1G49130 | UCACUUGUUGUUCUUGGAGUUU  | 123  | 4.5 | Cleavage    | [ Symbols:   WNK7   Protein kinase superfamily protein   chr1:18179304-18182391 REVERSE LENGTH=2060                                                                                                                                                          |
| AT1G49160 | UACAUUUGUCUGAAUAUGUAC   | 138  | 3.5 | Cleavage    | [ Symbols:   ARR19, RR19   response regulator 19   chr1:18191342-18193598 FORWARD LENGTH=1827                                                                                                                                                                |
| AT1G49300 | UUAGACCCGAGGUAUGAUGACU  | 330  | 3.5 | Cleavage    | [ Symbols:   ATRAB7, ATRABG3E, RABG3E   RAB GTPase homolog G3E   chr1:18234724-18237231 FORWARD LENGTH=1002                                                                                                                                                  |
| AT1G49340 | UGAAGGACAAGAUACAGCUGUC  | 415  | 3.5 | Cleavage    | [ Symbols:   ATP4K ALPHA   Phosphatidylinositol 3- and 4-kinase family protein   chr1:18252355-18264462 FORWARD LENGTH=6455                                                                                                                                  |
| AT1G49360 | UACCGGAGGACUGUACUAGCU   | 401  | 4   | Cleavage    | [ Symbols:   F-box family protein   chr1:18267231-18269448 REVERSE LENGTH=1578                                                                                                                                                                               |
| AT1G49580 | UUGAACAAAGCCUGUAUGAAGU  | 102  | 4   | Cleavage    | [ Symbols:   Calcium-dependent protein kinase (CDPK) family protein   chr1:18351458-18354619 FORWARD LENGTH=2209                                                                                                                                             |
| AT1G49630 | CGUACUGGCAAUUCUGGAGG    | 272  | 4   | Cleavage    | [ Symbols:   ATPREP2, PREP2   presequence protease 2   chr1:18368261-18375381 REVERSE LENGTH=3432                                                                                                                                                            |
| AT1G49670 | UUGAGCAUUGUUGUACAGCCU   | 113  | 4.5 | Cleavage    | [ Symbols:   NQR   ARP protein (REF)   chr1:18381258-18386108 REVERSE LENGTH=2310                                                                                                                                                                            |
| AT1G49730 | UAGAUGUUCUAGUAGUUGCA    | 232  | 3.5 | Cleavage    | [ Symbols:   Protein kinase superfamily protein   chr1:18402530-18405563 REVERSE LENGTH=1975                                                                                                                                                                 |
| AT1G49790 | UUAGAUAUUAUCUUGUUCUGGC  | 138  | 4   | Translation | [ Symbols:   F-box associated ubiquitination effector family protein   chr1:18433531-18437068 REVERSE LENGTH=921                                                                                                                                             |
| AT1G49832 | UCUUCGACUAGGUAAGCGUCU   | 355  | 4   | Cleavage    | [ Symbols:     chr1:18447621-18448239 FORWARD LENGTH=619                                                                                                                                                                                                     |
| AT1G49840 | UUUGGUUUUGGUUUAACUGCU   | 225  | 3   | Cleavage    | [ Symbols:   Protein of unknown function (DUF620)   chr1:18452070-18454358 FORWARD LENGTH=1859                                                                                                                                                               |
| AT1G49920 | CUUCUUCAGAGAAGUCCUCCU   | 132  | 1.5 | Cleavage    | [ Symbols:   MuDR family transposase   chr1:18481774-18484233 REVERSE LENGTH=2382                                                                                                                                                                            |
| AT1G49980 | UUGACGACCAACUCCGCUCCU   | 170  | 5   | Cleavage    | [ Symbols:   DNA/RNA polymerases superfamily protein   chr1:18507971-18513172 FORWARD LENGTH=2734                                                                                                                                                            |
| AT1G50060 | UCGGCUGAGGUUGGACGCCU    | 147  | 4   | Cleavage    | [ Symbols:   CAP (cysteine-rich secretory proteins, Antigen S, and Pathogenesis-related 1 protein) superfamily protein   chr1:18551186-18552578 FORWARD LENGTH=618                                                                                           |
| AT1G50260 | UGUCUACCCGUAUGUCCUUCU   | 150  | 4   | Cleavage    | [ Symbols:   NTMC2TPFES-1, NTMC2T5.1   N-terminal-transmembrane-C2 domain type 5.1   chr1:18617593-18621690 REVERSE LENGTH=2334                                                                                                                              |
| AT1G50350 | UUGAUUUCACCGGAUAACUUC   | 175  | 3.5 | Cleavage    | [ Symbols:   BEST Arabidopsis thaliana protein match is: RING/U-box superfamily protein (TAIR:ATG19950.1); Has 37 Blast hits to 37 proteins in 10 species: Archae - 0; Bacteria - 0; Metazoa - 0; Fungi - 0; Plants - 37; Viruses - 0; Other Eukaryotes      |
| AT1G50360 | UACUUGAGGACGUAACGACU    | 949  | 4.5 | Translation | [ Symbols:   VIIIA, ATVIIA   P-loop containing nucleoside triphosphate hydrolases superfamily protein   chr1:18649747-18657376 FORWARD LENGTH=4149                                                                                                           |
| AT1G50400 | UCGACACACUGUUAAGGAUUC   | 121  | 3.5 | Cleavage    | [ Symbols:   Eukaryotic porin family protein   chr1:18668155-18670546 FORWARD LENGTH=1157                                                                                                                                                                    |

|           |                         |      |     |               |                                                                                                                                                                                                                                                            |
|-----------|-------------------------|------|-----|---------------|------------------------------------------------------------------------------------------------------------------------------------------------------------------------------------------------------------------------------------------------------------|
| AT1G50570 | UUGAGCAAGUAGCUGACUCU    | 4031 | 5   | Cleavage      | [Symbols:   Calcium-dependent lipid-binding (CaLB domain) family protein   chr1:18726235-1872829 REVERSE LENGTH=1521                                                                                                                                       |
| AT1G50630 | UUGGACGUGGUAAGGACUAGG   | 101  | 3.5 | Cleavage      | [Symbols:   Protein of unknown function (DUF3537)   chr1:18751456-18753669 REVERSE LENGTH=1660                                                                                                                                                             |
| AT1G50770 | CAAAUCGGACAGCUCUACUGC   | 324  | 3.5 | Translational | [Symbols:   Amino transferase-like, plant mobile domain family protein   chr1:18818559-1882053 REVERSE LENGTH=1899                                                                                                                                         |
| AT1G50780 | UUUUGUUGACUUAUAGAAUCC   | 179  | 3   | Cleavage      | [Symbols:   2Fe-2S ferredoxin-like superfamily protein   chr1:18821267-18823077 REVERSE LENGTH=972                                                                                                                                                         |
| AT1G50790 | UUGAGAGCGUUGUAGUUAUCC   | 262  | 2.5 | Cleavage      | [Symbols:   Plant mobile domain protein family   chr1:18824050-18826488 REVERSE LENGTH=2439                                                                                                                                                                |
| AT1G51070 | UUUAGUUGCAUUAUUUGCGAC   | 142  | 3.5 | Translational | [Symbols:   bHLH115   basic helix-loop-helix (bHLH) DNA-binding superfamily protein   chr1:18927887-18929762 FORWARD LENGTH=1061                                                                                                                           |
| AT1G51210 | UCACUCGCGAUUUGAAGUACG   | 146  | 5   | Cleavage      | [Symbols:   UDP-Glucosyltransferase superfamily protein   chr1:18987809-18989110 FORWARD LENGTH=1302                                                                                                                                                       |
| AT1G51420 | UUUUGUGAACAUUGACUCCUAC  | 119  | 3.5 | Cleavage      | [Symbols:   ATPSP1, SPP1   sucrose-phosphatase 1   chr1:19064768-1906704 REVERSE LENGTH=1356                                                                                                                                                               |
| AT1G51690 | UUUUGAUCGAGGAGUUAUGGAU  | 112  | 3.5 | Translational | [Symbols:   ATB ALPHA, B ALPHA   protein phosphatase 2A 55 kDa regulatory subunit B alpha isoform   chr1:19165974-19170446 FORWARD LENGTH=2255                                                                                                             |
| AT1G51700 | UGAGAUUGCUGAAGGAGAAGAG  | 107  | 3.5 | Cleavage      | [Symbols:   ADOF1, DOF1   DOF zinc finger protein 1   chr1:19174070-19175189 FORWARD LENGTH=1120                                                                                                                                                           |
| AT1G51770 | UGAGUGGCGAGUAGGACCAUUA  | 117  | 4   | Cleavage      | [Symbols:   Core-2/-3 branching beta-1,6-N-acetylglucosaminyltransferase family protein   chr1:19201789-19203224 FORWARD LENGTH=1270                                                                                                                       |
| AT1G51802 | UUUGAACUCUAGUUGAACCUUUA | 227  | 4.5 | Translational | [Symbols:   Encodes a defensin-like (DEFU) family protein   chr1:19218592-19218783 REVERSE LENGTH=192                                                                                                                                                      |
| AT1G51860 | UUGACCCGAGUUGUAGUAGGAC  | 236  | 4.5 | Cleavage      | [Symbols:   Leucine-rich repeat protein kinase family protein   chr1:19257634-19261479 REVERSE LENGTH=2673                                                                                                                                                 |
| AT1G51870 | UCCCAACCCCAUGAUUUAAGCG  | 236  | 4   | Cleavage      | [Symbols:   protein kinase family protein   chr1:19262879-19267001 REVERSE LENGTH=2514                                                                                                                                                                     |
| AT1G51890 | UCCCAACCCCAUGAUUUAAGCG  | 236  | 5   | Cleavage      | [Symbols:   Leucine-rich repeat protein kinase family protein   chr1:19274658-19278528 REVERSE LENGTH=2775                                                                                                                                                 |
| AT1G51965 | UUUGGGUUUUGGGUUUAACUGCU | 225  | 3   | Cleavage      | [Symbols:   ABO5   ABA Overly Sensitive 5   chr1:19312078-19314145 REVERSE LENGTH=1953                                                                                                                                                                     |
| AT1G52110 | UUUCUGAAGGACCAAGCUCAGC  | 1012 | 3.5 | Cleavage      | [Symbols:   Mannose-binding lectin superfamily protein   chr1:19386789-19389740 REVERSE LENGTH=1848                                                                                                                                                        |
| AT1G52347 | UGACGGAGCAAGAUUAGCUCU   | 259  | 3.5 | Cleavage      | [Symbols:   other RNA   chr1:19496506-19497703 FORWARD LENGTH=628                                                                                                                                                                                          |
| AT1G52360 | UACCGGAGGAGCUGAUUAGCUG  | 401  | 4.5 | Cleavage      | [Symbols:   Coatomer, beta' subunit   chr1:19499343-19505757 FORWARD LENGTH=3099                                                                                                                                                                           |
| AT1G52530 | UUGACAACGGCUGAAGGAUUG   | 102  | 4.5 | Cleavage      | [Symbols:   CONTAINS InterPro DOMAIN/s: Hus1-like protein (InterPro:IPR007150); Has 129 Blast hits to 128 proteins in other species: Archae - 0; Bacteria - 0; Metazoa - 57; Fungi - 10; Plants - 47; Viruses - 0; Other Eukaryotes - 15 (source: NCBI BL) |
| AT1G52580 | UUGAGAGCAACCCACCGACUGC  | 261  | 3.5 | Translational | [Symbols:   ATRBL5, RBL5   RHOMBOLD-like protein 5   chr1:19587637-19589052 FORWARD LENGTH=1024                                                                                                                                                            |
| AT1G52590 | CGAGAGGUUUAACGAGGACUGAG | 3198 | 5   | Cleavage      | [Symbols:   Putative thiol-disulphide oxidoreductase DCC   chr1:19589009-19590273 REVERSE LENGTH=776                                                                                                                                                       |
| AT1G52690 | CGUACUGCGAUUAGCUGGUG    | 272  | 4.5 | Cleavage      | [Symbols:   Late embryogenesis abundant protein (LEA) family protein   chr1:19619745-19621534 FORWARD LENGTH=809                                                                                                                                           |
| AT1G52870 | UGUUGAUGCAAGUAGCUGACG   | 608  | 4   | Translational | [Symbols:   Peroxisomal membrane 22 kDa (Mpv17/PMP22) family protein   chr1:19685747-19687863 FORWARD LENGTH=1391                                                                                                                                          |
| AT1G52920 | UCUGUAUGCAUUGUUGGACUAC  | 466  | 4   | Cleavage      | [Symbols:   GCR2, GPCR   G protein coupled receptor   chr1:19709275-19711052 REVERSE LENGTH=1322                                                                                                                                                           |
| AT1G52950 | ACAAACUGUUGAACCAAGCCU   | 1107 | 4.5 | Cleavage      | [Symbols:   Nucleic acid-binding, OB-fold-like protein   chr1:19725483-19728007 FORWARD LENGTH=1701                                                                                                                                                        |
| AT1G53160 | UUUUGUGUCUGAGUCCCGCCU   | 669  | 4   | Translational | [Symbols:   SPL4   squamosa promoter binding protein-like 4   chr1:19806421-19807301 FORWARD LENGTH=803                                                                                                                                                    |
| AT1G53200 | UACUCGACCAACUGUUAAGGA   | 183  | 4   | Translational | [Symbols:   unknown protein; Has 35333 Blast hits to 34131 proteins in 2444 species: Archae - 798; Bacteria - 22429; Metazoa - 974; Fungi - 991; Plants - 531; Viruses - 0; Other Eukaryotes - 9610 (source: NCBI BLINK)   chr1:19840376-19843403          |
| AT1G53210 | UACCGUGUAGCUGCUUUAAGAC  | 3223 | 4.5 | Translational | [Symbols:   sodium/calcium exchanger family protein / calcium-binding EF hand family protein   chr1:19844632-19847836 FORWARD LENGTH=2219                                                                                                                  |
| AT1G53233 | UACCGAGGAGUAGUAGGACGAC  | 153  | 4.5 | Translational | [Symbols:   other RNA   chr1:19850431-19851217 FORWARD LENGTH=786                                                                                                                                                                                          |
| AT1G53340 | UUUGGCGGCUAACUCUGCAGAG  | 2546 | 4   | Translational | [Symbols:   Cysteine/Histidine-rich C1 domain family protein   chr1:19898929-19900931 REVERSE LENGTH=2004                                                                                                                                                  |
| AT1G53345 | UGCAACGAGGUGUGUAUGAUAG  | 174  | 4   | Cleavage      | [Symbols:   unknown protein; INVOLVED IN: biological_process unknown; LOCATED IN: endomembrane system; EXPRESSED IN: 8 plant structures; EXPRESSED DURING: 4 anthesis, F mature embryo stage, petal differentiation and expansion stage                    |
| AT1G53350 | UAGUGUCCGAGUAGUACACC    | 461  | 3.5 | Translational | [Symbols:   Disease resistance protein (CC-NBS-LRR class) family   chr1:19903899-19907515 FORWARD LENGTH=2784                                                                                                                                              |
| AT1G53420 | AUUGUGUUAUUAUUUUGAGCCU  | 108  | 3.5 | Cleavage      | [Symbols:   Leucine-rich repeat transmembrane protein kinase   chr1:19926626-19931494 REVERSE LENGTH=2862                                                                                                                                                  |
| AT1G53440 | AUUGUGUUAUUAUUUGAGCCU   | 108  | 4   | Cleavage      | [Symbols:   Leucine-rich repeat transmembrane protein kinase   chr1:19945959-19951562 FORWARD LENGTH=3108                                                                                                                                                  |
| AT1G53450 | UGAGAUUUGAAGUAGGAAAGAG  | 101  | 3   | Translational | [Symbols:   unknown protein; BEST Arabidopsis thaliana protein match is: unknown protein (TAIR:AT1G53250.1); Has 35333 Blast hits to 34131 proteins in 2444 species: Archae - 798; Bacteria - 22429; Metazoa - 974; Fungi - 991; Plants - 531; Vi          |

|           |                         |       |                 |                                                                                                                                                                                                                                                        |
|-----------|-------------------------|-------|-----------------|--------------------------------------------------------------------------------------------------------------------------------------------------------------------------------------------------------------------------------------------------------|
| AT1G59630 | UUUGUGAGUUGUUGAGGUCU    | 141   | 4 Translation   | [ Symbols:   F-box associated ubiquitination effector family protein   chr1:21907177-21907955 REVERSE LENGTH=720                                                                                                                                       |
| AT1G59840 | UUUGGACACAGUGGAGCUGUG   | 104   | 3.5 Cleavage    | [ Symbols: CBXA   cofactor assembly of complex C   chr1:22026546-22028419 FORWARD LENGTH=1162                                                                                                                                                          |
| AT1G59885 | UACGAGACUCUAGCCGACU     | 307   | 4.5 Translation | [ Symbols: unknown protein; Has 0 Blast hits to 0 proteins in 0 species (source: NCBI BLink)   chr1:22042308-22042815 FORWARD LENGTH=390                                                                                                               |
| AT1G59900 | UGAGAACGUCUGCCAUGGGA    | 158   | 4 Cleavage      | [ Symbols: AT-1 ALPHA, E1 ALPHA   pyruvate dehydrogenase complex E1 alpha subunit   chr1:22051295-22053885 FORWARD LENGTH=1468                                                                                                                         |
| AT1G60000 | UAUCUCUGUCUUGAACGACCU   | 295   | 3 Translation   | [ Symbols: RNA-binding (RRM/RBD/RNP motifs) family protein   chr1:22093569-22094626 REVERSE LENGTH=972                                                                                                                                                 |
| AT1G60160 | UGAGAAACUUGACUACAGACU   | 158   | 4 Cleavage      | [ Symbols: Potassium transporter family protein   chr1:22188114-22191395 REVERSE LENGTH=2700                                                                                                                                                           |
| AT1G60300 | UACUGGAGGAGCUGACGACACU  | 949   | 5 Cleavage      | [ Symbols: NAC (No Apical Meristem) domain transcriptional regulator superfamily protein   chr1:22229780-22230748 REVERSE LENGTH=969                                                                                                                   |
| AT1G60380 | UACUGGAGGAGCUGACGACACU  | 949   | 4.5 Cleavage    | [ Symbols: NAC (No Apical Meristem) domain transcriptional regulator superfamily protein   chr1:22246455-22247411 REVERSE LENGTH=957                                                                                                                   |
| AT1G60505 | UGUGUAUACAAGAGCUGGCGU   | 215   | 4 Cleavage      | [ Symbols: other RNA   chr1:22294677-22297220 REVERSE LENGTH=1928                                                                                                                                                                                      |
| AT1G60545 | UGUGGAUACAAGAGCUGGCGU   | 215   | 4 Cleavage      | [ Symbols: other RNA   chr1:22302492-22305156 FORWARD LENGTH=2305                                                                                                                                                                                      |
| AT1G60800 | UUUUUGCUUAGACUUAAGAAUC  | 179   | 4 Cleavage      | [ Symbols: NIK3   NSP-interacting kinase 3   chr1:22383453-22387457 REVERSE LENGTH=2573                                                                                                                                                                |
| AT1G60850 | UCAUAUGGACUUGGCUACACC   | 101   | 3 Translation   | [ Symbols: ATPAC42, AAC42   DNA-directed RNA polymerase family protein   chr1:22397916-22400362 REVERSE LENGTH=1380                                                                                                                                    |
| AT1G60860 | UUUGGACUACUACUUGCAAG    | 1274  | 4 Translation   | [ Symbols: AGD2   ARF-GAP domain 2   chr1:22400927-22407777 REVERSE LENGTH=2786                                                                                                                                                                        |
| AT1G60930 | UCGAGUGACUUGGAGGCAU     | 244   | 3.5 Cleavage    | [ Symbols: RECQL4B, ATRECQ4B, RECQ4B   RECQ helicase L4B   chr1:22430847-22438877 REVERSE LENGTH=3877                                                                                                                                                  |
| AT1G60960 | UGUGAGUGUUUGUGAGGCUU    | 178   | 3.5 Translation | [ Symbols: IRT3, ATIRT3   iron regulated transporter 3   chr1:22445310-22447214 REVERSE LENGTH=1532                                                                                                                                                    |
| AT1G60970 | UCACUCCAGACCAACGCGCUG   | 106   | 4 Translation   | [ Symbols:   SNARE-like superfamily protein   chr1:22447848-22449526 REVERSE LENGTH=833                                                                                                                                                                |
| AT1G61030 | AUUUCAGUGAGCAGUACUCU    | 200   | 4 Cleavage      | [ Symbols:   WAPL (Wings apart-like protein regulation of heterochromatin) protein   chr1:22477896-22482380 FORWARD LENGTH=2896                                                                                                                        |
| AT1G61170 | UUGGAGGAGUAUAGCGCCGC    | 4887  | 3.5 Cleavage    | [ Symbols:   unknown protein; FUNCTIONS IN: molecular_function unknown; INVOLVED IN: N-terminal protein myristoylation; LOCATED IN: cellular_component unknown; EXPRESSED IN: 19 plant structures; EXPRESSED DURING: 12 growth stage                   |
| AT1G61215 | UCCACCCAGCUGAUGCAAUAG   | 1524  | 5 Cleavage      | [ Symbols: BRD4   bromodomain 4   chr1:22572645-22575527 FORWARD LENGTH=2109                                                                                                                                                                           |
| AT1G61240 | CCUGAGCCUAGUGACCGAGUA   | 270   | 3.5 Cleavage    | [ Symbols:   Protein of unknown function (DUF707)   chr1:22582024-22585203 FORWARD LENGTH=1674                                                                                                                                                         |
| AT1G61250 | UCUAGUCCGAAAAUUGCGAAC   | 163   | 4.5 Cleavage    | [ Symbols: SC3   secretory carrier 3   chr1:22585899-22588905 FORWARD LENGTH=1247                                                                                                                                                                      |
| AT1G61330 | UGAGGACACUCACCGGACUGA   | 230   | 4 Cleavage      | [ Symbols: FBD, F-box and Leucine Rich Repeat domains containing protein   chr1:22629575-22624527 FORWARD LENGTH=1344                                                                                                                                  |
| AT1G61360 | UGUGGAUAACAAGAGUUGGCGU  | 111   | 3.5 Cleavage    | [ Symbols: S-locus lectin protein kinase family protein   chr1:22637728-22641825 REVERSE LENGTH=2825                                                                                                                                                   |
| AT1G61460 | UCGAGUAUGAGCCUGCAUGAUG  | 250   | 3.5 Cleavage    | [ Symbols: S-locus protein kinase, putative   chr1:22674198-22677719 REVERSE LENGTH=2585                                                                                                                                                               |
| AT1G61660 | CCCAUGUUGCAAGAACCGGAAC  | 136   | 5 Cleavage      | [ Symbols: basic helix-loop-helix (BHLH) DNA-binding superfamily protein   chr1:22753736-22756300 REVERSE LENGTH=1521                                                                                                                                  |
| AT1G61750 | UGACGGCAAGAUAAGUUGUCU   | 1505  | 4 Translation   | [ Symbols:   Receptor-like protein kinase-related family protein   chr1:22804613-22806318 REVERSE LENGTH=1026                                                                                                                                          |
| AT1G61795 | UUUUUAUUAACAAGUCUGACU   | 133   | 4 Translation   | [ Symbols:   PAK-box/P21-Rho-binding family protein   chr1:22819632-22821029 FORWARD LENGTH=901                                                                                                                                                        |
| AT1G61820 | UAUAGGGGCUUGAAGAAAGUCU  | 535   | 3.5 Cleavage    | [ Symbols: BGLU46   beta glucosidase 46   chr1:22835078-22838615 FORWARD LENGTH=2096                                                                                                                                                                   |
| AT1G61890 | UCUGAAUCUACAAGCCAGCGAAC | 493   | 3.5 Cleavage    | [ Symbols:   MATE efflux family protein   chr1:22867770-22871280 REVERSE LENGTH=1956                                                                                                                                                                   |
| AT1G61900 | UUUGUGUACCGUAGGACUCCU   | 152   | 3.5 Translation | [ Symbols:   unknown protein; BEST Arabidopsis thaliana protein match is: unknown protein (TAIR:AT2G30700.1)   chr1:22882215-22885052 REVERSE LENGTH=1913                                                                                              |
| AT1G61940 | CUACAAAUUGAGACACUGGCU   | 156   | 4.5 Cleavage    | [ Symbols:   ATLPA4, TLP4   tubby like protein 4   chr1:22897399-22898575 REVERSE LENGTH=735                                                                                                                                                           |
| AT1G61950 | UGAGAAACUUGACUACAGACU   | 158   | 3.5 Cleavage    | [ Symbols:   CKP19   calcium-dependent protein kinase 19   chr1:22899417-22901946 FORWARD LENGTH=1661                                                                                                                                                  |
| AT1G61990 | UUACCCGUAAGCUCUUAACAG   | 129   | 5 Cleavage      | [ Symbols:   Mitochondrial transcription termination factor family protein   chr1:22911205-22912935 FORWARD LENGTH=1731                                                                                                                                |
| AT1G62020 | UGUGUAUGCAUAAUCUGGGAC   | 106   | 3.5 Translation | [ Symbols:   Coatomer, alpha subunit   chr1:22919534-22924024 FORWARD LENGTH=4098                                                                                                                                                                      |
| AT1G62050 | UUUCUCCGUGUGGUGCGCCG    | 170   | 3.5 Cleavage    | [ Symbols:   Ankyrin repeat family protein   chr1:22936127-22939024 REVERSE LENGTH=2221                                                                                                                                                                |
| AT1G62085 | UUACCCGUAAGCUCUUAACAG   | 129   | 5 Cleavage      | [ Symbols:   Mitochondrial transcription termination factor family protein   chr1:22948757-22950142 REVERSE LENGTH=1386                                                                                                                                |
| AT1G62120 | UACCCGUAUGUGCUCUACAAG   | 192   | 5 Cleavage      | [ Symbols:   Mitochondrial transcription termination factor family protein   chr1:22960191-22961779 REVERSE LENGTH=1589                                                                                                                                |
| AT1G62150 | UACCCGUAUGUGCUCUACAAG   | 3223  | 4.5 Cleavage    | [ Symbols:   Mitochondrial transcription termination factor family protein   chr1:22970029-22971764 REVERSE LENGTH=1736                                                                                                                                |
| AT1G62305 | AUUGGUAUUGGACUUAAGGCG   | 128   | 3 Translation   | [ Symbols:   Core-2/-branching beta-1,6-N-acetylglucosaminyltransferase family protein   chr1:23026776-23029339 REVERSE LENGTH=1428                                                                                                                    |
| AT1G62330 | UAUUGAUUUUUGGCCGUSAGU   | 116   | 4 Translation   | [ Symbols:   O-fucosyltransferase family protein   chr1:23046893-23050193 FORWARD LENGTH=2171                                                                                                                                                          |
| AT1G62490 | UACCCGUAUGUGCCUACAAG    | 192   | 4.5 Cleavage    | [ Symbols:   Mitochondrial transcription termination factor family protein   chr1:23130405-23131533 REVERSE LENGTH=1005                                                                                                                                |
| AT1G62500 | CUCAACGAUGUAUAAGGCGCU   | 208   | 3 Cleavage      | [ Symbols:   Bifunctional inhibitor/lipid-transfer protein/seed storage 2S albumin superfamily protein   chr1:23132045-23133502 FORWARD LENGTH=1458                                                                                                    |
| AT1G62540 | UUUGGCGUCCAAUCUGGACAG   | 4868  | 4.5 Cleavage    | [ Symbols: FMO GS-OK2   flavin-monooxygenase glucosinolate 5-oxygenase 2   chr1:23151794-23155717 FORWARD LENGTH=1740                                                                                                                                  |
| AT1G62560 | UUGGAGGCGUCUUAUAGAGA    | 679   | 3.5 Translation | [ Symbols: FMO GS-OK3   flavin-monooxygenase glucosinolate 5-oxygenase 3   chr1:23159823-23162649 FORWARD LENGTH=1576                                                                                                                                  |
| AT1G62590 | AUUGUGUAUAUUAUUGAGCCU   | 108   | 4 Cleavage      | [ Symbols:   pentatricopeptide (PPR) repeat-containing protein   chr1:23176930-23179248 REVERSE LENGTH=2212                                                                                                                                            |
| AT1G62740 | UGAGUAAGAAUUCUUAUGAGU   | 114   | 3.5 Cleavage    | [ Symbols:   HopZ   stress-inducible protein, putative   chr1:23230956-23233543 FORWARD LENGTH=1949                                                                                                                                                    |
| AT1G62750 | ACAAACUGUUGAACAACGCCU   | 1107  | 4.5 Cleavage    | [ Symbols:   ATSCO1, ATSCO1/CPEF-G, SCO1   Translation elongation factor EFG/EF2 protein   chr1:23233434-23236447 REVERSE LENGTH=2666                                                                                                                  |
| AT1G62810 | UUGGAGAACUCCUGACCGACCA  | 1272  | 5 Translation   | [ Symbols:   Copper amine oxidase family protein   chr1:23257726-23261966 REVERSE LENGTH=2860                                                                                                                                                          |
| AT1G62860 | UACUGGAGGAGCAGUACGACCU  | 949   | 5 Cleavage      | [ Symbols:   pseudogene of pentatricopeptide (PPR) repeat-containing protein   chr1:23274676-23277017 REVERSE LENGTH=2342                                                                                                                              |
| AT1G62950 | UACAAGAACUCCAACCUACACU  | 144   | 3 Cleavage      | [ Symbols:   leucine-rich repeat transmembrane protein kinase family protein   chr1:23315294-23318234 FORWARD LENGTH=2846                                                                                                                              |
| AT1G63100 | CGUCUAGCGAAUUCGCGAG     | 127   | 4 Cleavage      | [ Symbols:   GRAS family transcription factor   chr1:23399391-23401367 REVERSE LENGTH=1977                                                                                                                                                             |
| AT1G63170 | UAUACCAACUUGAACUUUCU    | 172   | 4 Cleavage      | [ Symbols:   Zinc finger, C2HC4 type (RING finger) family protein   chr1:23425352-23427311 FORWARD LENGTH=1606                                                                                                                                         |
| AT1G63230 | UGAACCGUAGAUUUUCUUCU    | 123   | 2 Translation   | [ Symbols:   Tetrapentatricopeptide repeat (TPR)-like superfamily protein   chr1:23450654-23452311 FORWARD LENGTH=1572                                                                                                                                 |
| AT1G63430 | UAUGGAGGAGCAGUACUUGGA   | 134   | 3.5 Cleavage    | [ Symbols:   Leucine-rich repeat protein kinase family protein   chr1:23522608-23525770 FORWARD LENGTH=2602                                                                                                                                            |
| AT1G63440 | UGAGUAGAACUACGAGACGACU  | 583   | 3.5 Cleavage    | [ Symbols:   HMAS F heavy metal atpase 5   chr1:23527655-23531109 FORWARD LENGTH=2988                                                                                                                                                                  |
| AT1G63450 | UUUGGAGCUCUACUUAUGAGA   | 437   | 3.5 Cleavage    | [ Symbols:   RH58   root hair specific 8   chr1:23531409-23534569 FORWARD LENGTH=3161                                                                                                                                                                  |
| AT1G63480 | CGAUUUCUUAUUGCAUUGUGU   | 186   | 4 Cleavage      | [ Symbols:   AT hook motif DNA-binding family protein   chr1:23539557-23542137 REVERSE LENGTH=1853                                                                                                                                                     |
| AT1G63490 | UAUGGAUACUUGGGACUUAACC  | 333   | 4.5 Cleavage    | [ Symbols:   transcription factor jumonji (jmiC) domain-containing protein   chr1:23544656-23552030 REVERSE LENGTH=3717                                                                                                                                |
| AT1G63520 | UAACAAGAACUUCUUCUUUUUCU | 235   | 3.5 Cleavage    | [ Symbols:   Protein of unknown function (DUF3527)   chr1:23559887-23562143 FORWARD LENGTH=2073                                                                                                                                                        |
| AT1G63530 | UAUAGGGGCUUGAAGAAAGUCU  | 535   | 2.5 Cleavage    | [ Symbols:   BEST Arabidopsis thaliana protein match is: hydroxyproline-rich glycoprotein family protein (TAIR:AT1G63540.1); Has 10212 Blast hits to 4024 proteins in 434 species: Archae - 1; Bacteria - 1259; Metazoa - 3608; Fungi - 2247; Plants - |
| AT1G63570 | UUUAGGUAUGUUGCAUAUGAGU  | 1164  | 4.5 Cleavage    | [ Symbols:   Receptor-like protein kinase-related family protein   chr1:23575450-23576304 FORWARD LENGTH=855                                                                                                                                           |
| AT1G63640 | UGGCGCUAACUCUGCAAGGU    | 10625 | 3 Cleavage      | [ Symbols:   P-loop nucleoside triphosphate hydrolases superfamily protein with CH (Calponin Homology) domain   chr1:23589067-23595775 REVERSE LENGTH=3585                                                                                             |
| AT1G63710 | UUUUUAUUAACCGGAUAUAACUC | 104   | 4 Translation   | [ Symbols:   CYP86A7   cytochrome P450, family 86, subfamily A, polypeptide 7   chr1:23632178-23633942 REVERSE LENGTH=1765                                                                                                                             |
| AT1G63760 | UGAGAACGUCUGCCAUGGGA    | 158   | 4 Cleavage      | [ Symbols:   ARIG, ATARIG   pseudogene, ARI protein, similar to ARI protein (A Drosophila RING Finger Motif Involved in Axonal Path-finding in the Central Nervous System) GB:CAA66953 (Drosophila melanogaster); blastp match of 86% identity and     |
| AT1G63820 | UUCACUACUUGCCUUCUGAACU  | 119   | 3 Cleavage      | [ Symbols:   CCT motif family protein   chr1:23682422-23684367 REVERSE LENGTH=1306                                                                                                                                                                     |
| AT1G63850 | UAGAUAUAUACUGUCUUGGCA   | 194   | 4 Cleavage      | [ Symbols:   BTB/POZ domain-containing protein   chr1:23696962-23698708 FORWARD LENGTH=1647                                                                                                                                                            |
| AT1G64060 | UAUGCUUCUGUUGAUCCACCU   | 344   | 3.5 Cleavage    | [ Symbols:   ATRB0H F, ATRB0H, RBOHAP108, RBOHF, RBOH F   respiratory burst oxidase protein F   chr1:23769774-23776931 FORWARD LENGTH=3941                                                                                                             |
| AT1G64300 | UUAGGCGUGAGAUGGAGCGCC   | 196   | 4.5 Cleavage    | [ Symbols:   Protein kinase family protein   chr1:23863066-23866045 FORWARD LENGTH=2721                                                                                                                                                                |
| AT1G64350 | UUAAGAAUAAACUGAACCAAGCC | 263   | 3.5 Cleavage    | [ Symbols:   SEH1H   Transducin/WD40 repeat-like superfamily protein   chr1:23881512-23883297 FORWARD LENGTH=1275                                                                                                                                      |
| AT1G64430 | CUGGCGGAAAGAGAGAGGCGU   | 259   | 3.5 Cleavage    | [ Symbols:   Pentatricopeptide repeat (PPR) superfamily protein   chr1:23933380-23936867 FORWARD LENGTH=2372                                                                                                                                           |
| AT1G64540 | UGAGGCAAUUUGUGAAGUUGU   | 154   | 3.5 Cleavage    | [ Symbols:   F-box/FBD-like domains containing protein   chr1:23965909-23968425 FORWARD LENGTH=1335                                                                                                                                                    |
| AT1G64570 | CAUCAAGAACCGGUAUGCCU    | 125   | 2.5 Cleavage    | [ Symbols:   DUO3   Homeodomain-like superfamily protein   chr1:23978868-23983925 FORWARD LENGTH=3720                                                                                                                                                  |
| AT1G64585 | AUUGUGUAUAUUAUUGAGCCU   | 108   | 3.5 Cleavage    | [ Symbols:   RTFL22, DVL12   ROTUNDIFOLIA like 22   chr1:23989933-23990097 REVERSE LENGTH=165                                                                                                                                                          |
| AT1G64740 | UUGAGGAGCACUCCACGACUG   | 261   | 4 Cleavage      | [ Symbols:   TUA1   alpha-1 tubulin   chr1:24050006-24052487 FORWARD LENGTH=1652                                                                                                                                                                       |
| AT1G64790 | UAAACUUGAACCAUGCCUAGA   | 302   | 3.5 Translation | [ Symbols:   ILA   ILTYH1A   chr1:24065014-24083428 REVERSE LENGTH=8334                                                                                                                                                                                |
| AT1G64800 | AAUUCGAGAACUCCUUCUACCA  | 255   | 4 Cleavage      | [ Symbols:   DNA binding;sequence-specific DNA binding transcription factors   chr1:24085086-24085433 FORWARD LENGTH=348                                                                                                                               |
| AT1G64840 | UCGCGCAACACUAAACCGU     | 129   | 4 Translation   | [ Symbols:   Protein of unknown function (DUF295)   chr1:24093558-24095399 FORWARD LENGTH=1637                                                                                                                                                         |
| AT1G64980 | UGUGUGUUGACCUUUAUCGUCU  | 106   | 5 Cleavage      | [ Symbols:   Nucleotide-diphospho-sugar transferases superfamily protein   chr1:24137517-24139276 REVERSE LENGTH=1235                                                                                                                                  |
| AT1G65190 | UUUCUGACGGACAGAAUAGU    | 480   | 3 Cleavage      | [ Symbols:   Protein kinase superfamily protein   chr1:24215644-24217328 REVERSE LENGTH=1685                                                                                                                                                           |
| AT1G65280 | UACCGGAGGAGCUACUAGGCU   | 401   | 4.5 Cleavage    | [ Symbols:   DNAB1 heat shock N-terminal domain-containing protein   chr1:24245296-24248762 FORWARD LENGTH=2132                                                                                                                                        |
| AT1G65320 | UUGGUCACACAGUGGACUUGU   | 104   | 4.5 Cleavage    | [ Symbols:   Cystathionine beta-synthase (CBS) family protein   chr1:24259888-24262951 REVERSE LENGTH=1865                                                                                                                                             |
| AT1G65365 | UCUAUAGGAGCUGUACUACU    | 106   | 3 Cleavage      | [ Symbols:   pseudogene, putative protein kinase, blastp match of 45% identity and 1.7e-40 P-value to GP[126171940] gi AA174302.1 AC083944 Putative protein kinase (Oryza sativa [japonica cultivar-group])   chr1:24282516-124                        |
| AT1G65410 | UUUCUACAGACUGGAUAGGACU  | 265   | 3.5 Cleavage    | [ Symbols:   ATNAP11, TGD3, NAP11   non-intrinsic ABC protein 11   chr1:24295169-24297595 FORWARD LENGTH=1494                                                                                                                                          |
| AT1G65420 | UACGCUUCUGGGAUUAUCUGGA  | 271   | 4 Translation   | [ Symbols:   NPQ7   Protein of unknown function (DUF565)   chr1:24297480-24298570 REVERSE LENGTH=979                                                                                                                                                   |
| AT1G65430 | UUUCUUGGAGUGGAUAGGACU   | 102   | 3.5 Translation | [ Symbols:   ARIB, ATARIB   IIR domain-containing protein   chr1:24300898-24306236 REVERSE LENGTH=2048                                                                                                                                                 |
| AT1G65760 | CAAAUUGGAGACUCCUGAC     | 230   | 4 Cleavage      | [ Symbols:   Protein of unknown function (DUF295)   chr1:24458591-24459715 FORWARD LENGTH=1089                                                                                                                                                         |
| AT1G65780 | UGAGGACACUCCACGACGACUA  | 230   | 4 Translation   | [ Symbols:   P-loop containing nucleoside triphosphate hydrolases superfamily protein   chr1:24462958-24466888 REVERSE LENGTH=3198                                                                                                                     |
| AT1G65860 | UGAAGGCAAGCUCACGUGCU    | 1483  | 3 Cleavage      | [ Symbols:   FMO GS-OK1   flavin-monooxygenase glucosinolate 5-oxygenase 1   chr1:24499066-24502745 REVERSE LENGTH=1591                                                                                                                                |
| AT1G65875 | UACAGAAUAGGCUUAAGUAUC   | 189   | 5 Cleavage      | [ Symbols:   pseudogene, similar to EST AU070346(S12172) corresponds to a region of the predicted gene.~similar to AMP-binding protein. (X94625), blastp match of 57% identity and 4.5e-137 P-value to GP[6063549] gi BAA85409.1 AP0006                |

|           |                         |      |                 |                                                                                                                                                                                                                                                         |
|-----------|-------------------------|------|-----------------|---------------------------------------------------------------------------------------------------------------------------------------------------------------------------------------------------------------------------------------------------------|
| AT1G65880 | UGUAUGCAUUAACUUGGACU    | 149  | 4 Translation   | [ Symbols: BZ01   benzoyloxyglucosinolate 1   chr1:24508633-24510742 REVERSE LENGTH=1748                                                                                                                                                                |
| AT1G65890 | UGUAUGCAUUAACUUGGACU    | 149  | 4 Translation   | [ Symbols: AAE12   acyl activating enzyme 12   chr1:24512457-24514659 REVERSE LENGTH=1926                                                                                                                                                               |
| AT1G65910 | UAUUGAUUUUUUGCCGAGGU    | 116  | 3.5 Cleavage    | [ Symbols: anac028, NAC028   NAC domain containing protein 28   chr1:24520791-24524164 REVERSE LENGTH=2094                                                                                                                                              |
| AT1G66173 | UACGCGCAGCCGGUCUGGCC    | 119  | 4.5 Cleavage    | [ Symbols:   other RNA   chr1:24642586-24644068 FORWARD LENGTH=1483                                                                                                                                                                                     |
| AT1G66270 | UUCUGAGCGACCAAGUAUAGU   | 313  | 3.5 Cleavage    | [ Symbols: BGLU21   Glycosyl hydrolase superfamily protein   chr1:24699990-24703041 REVERSE LENGTH=1735                                                                                                                                                 |
| AT1G66370 | UGAAGGACAAGUACACGUCGU   | 415  | 2.5 Cleavage    | [ Symbols: MYB113, ATMYB113   myb domain protein 113   chr1:24753634-24754604 FORWARD LENGTH=741                                                                                                                                                        |
| AT1G66410 | UCGGCUCAACCUUAACACGUGU  | 129  | 4.5 Cleavage    | [ Symbols: CAM4   calmodulin 4   chr1:24774260-24775984 REVERSE LENGTH=850                                                                                                                                                                              |
| AT1G66490 | CAUCAGAACCCGUAUAGCCGU   | 125  | 3.5 Cleavage    | [ Symbols:   F-box and associated interaction domains-containing protein   chr1:24809421-24810549 REVERSE LENGTH=1083                                                                                                                                   |
| AT1G66620 | UACGUAACAAGACUUCUUCU    | 1828 | 4 Translation   | [ Symbols:   Protein with RING/U-box and TRAF-like domains   chr1:24852806-24854153 REVERSE LENGTH=1051                                                                                                                                                 |
| AT1G66660 | UUCUAUGUAUUCUAGUUGCGA   | 1437 | 3 Cleavage      | [ Symbols:   Protein with RING/U-box and TRAF-like domains   chr1:24861876-24863368 REVERSE LENGTH=1195                                                                                                                                                 |
| AT1G66830 | UCAAAGCAUUGGAGGAUUUGU   | 102  | 3.5 Cleavage    | [ Symbols:   Leucine-rich repeat protein kinase family protein   chr1:24930665-24932918 REVERSE LENGTH=2177                                                                                                                                             |
| AT1G66890 | UCUGGGUAGUAGGGAUUAUUA   | 123  | 3 Cleavage      | [ Symbols:   FUNCTIONS IN: molecular_function unknown; INVOLVED IN: biological_process unknown; LOCATED IN: chloroplast; EXPRESSED DURING: 13 growth stages; BEST Arabidopsis thaliana protein match                                                    |
| AT1G66900 | UUCGAGCUUUCGUAGGCCAAC   | 156  | 4.5 Cleavage    | [ Symbols:   alpha/beta-Hydrolases superfamily protein   chr1:24959334-24961616 FORWARD LENGTH=1398                                                                                                                                                     |
| AT1G66970 | UGAGAGCACUCCACCGACUGA   | 230  | 4 Translation   | [ Symbols: SVL2   SHV3-like 2   chr1:24992553-24996117 REVERSE LENGTH=2663                                                                                                                                                                              |
| AT1G67020 | UCUGAAUCUCAAAGACCCCAA   | 493  | 3.5 Cleavage    | [ Symbols:   unknown protein; FUNCTIONS IN: molecular_function unknown; INVOLVED IN: biological_process unknown; LOCATED IN: cellular_component unknown; EXPRESSED IN: leaf; Has 72 Blast hits to 72 proteins in 9 species: Archae - 0; Ba              |
| AT1G67090 | UUGAAAGACUUGUGGAUACCC   | 926  | 3 Cleavage      | [ Symbols: RBCS1A   ribulose biphosphate carboxylase small chain 1A   chr1:25048158-25049424 REVERSE LENGTH=1018                                                                                                                                        |
| AT1G67120 | UUCUUCAGACUGGAUAGGACU   | 265  | 2.5 Cleavage    | [ Symbols:   ATPases;nucleotide binding;ATP binding;nucleoside-triphosphates;transcription factor binding   chr1:25069562-25095526 REVERSE LENGTH=16347                                                                                                 |
| AT1G67130 | UACUGGAGGACGUACAGCACU   | 949  | 4 Cleavage      | [ Symbols:   F-box family protein   chr1:25099262-25100625 REVERSE LENGTH=1176                                                                                                                                                                          |
| AT1G67140 | UAAGCAUUUUGAUUACCGGCU   | 285  | 3.5 Translation | [ Symbols: SWEETIE   HEAT repeat-containing protein   chr1:25100908-25117372 REVERSE LENGTH=6774                                                                                                                                                        |
| AT1G67300 | UGAAGGAUUUGUGGUUAACCA   | 474  | 4.5 Cleavage    | [ Symbols:   Major facilitator superfamily protein   chr1:25193704-25197089 REVERSE LENGTH=1811                                                                                                                                                         |
| AT1G67310 | UGACUGCGAUUAGAGCCUGA    | 416  | 4 Translation   | [ Symbols:   Calmodulin-binding transcription activator protein with CG-1 and Ankyrin domains   chr1:25198182-25203126 REVERSE LENGTH=3051                                                                                                              |
| AT1G67320 | UUGUUCUAGACUGCCGGGUG    | 131  | 5 Cleavage      | [ Symbols: DNA primase, large subunit family   chr1:25205279-25209033 REVERSE LENGTH=1673                                                                                                                                                               |
| AT1G67340 | UAAGUAGCAUAGUAGGAGAGA   | 302  | 2.5 Translation | [ Symbols: HCP-like superfamily protein with MYND-type zinc finger   chr1:25230265-25231840 FORWARD LENGTH=1416                                                                                                                                         |
| AT1G67370 | UGAGAAGCCUCUGCCAUUUGGA  | 158  | 4.5 Translation | [ Symbols:   Zn-dependent exopeptidases superfamily protein   chr1:25235411-25260439 FORWARD LENGTH=2690                                                                                                                                                |
| AT1G67510 | UGACGGACAAGAUAAUUGUGU   | 1505 | 4 Cleavage      | [ Symbols:   Leucine-rich repeat protein kinase family protein   chr1:25297477-25300184 REVERSE LENGTH=2160                                                                                                                                             |
| AT1G67550 | CAUUGAUUCUAAAGCUCUGCGU  | 190  | 4.5 Translation | [ Symbols: URE   urease   chr1:25312740-25317395 FORWARD LENGTH=3103                                                                                                                                                                                    |
| AT1G67610 | UACACAAGGGGCUCCUCGCACC  | 211  | 4 Cleavage      | [ Symbols:   pseudogene, hypothetical protein   chr1:25339036-25340241 REVERSE LENGTH=1206                                                                                                                                                              |
| AT1G67645 | UACACAAGGGGCUCCUCGCACC  | 211  | 4 Cleavage      | [ Symbols:   pseudogene, hypothetical protein   chr1:25354910-25356112 FORWARD LENGTH=1203                                                                                                                                                              |
| AT1G67720 | CAAGAACCCTGACGAGACUUCG  | 169  | 3.5 Translation | [ Symbols:   Leucine-rich repeat protein kinase family protein   chr1:25386341-25391073 FORWARD LENGTH=3160                                                                                                                                             |
| AT1G67750 | UUAAGACCCGAGGAUGAUGGACU | 330  | 3 Translation   | [ Symbols:   Pectate lyase family protein   chr1:25401588-25403503 FORWARD LENGTH=1637                                                                                                                                                                  |
| AT1G67780 | UUUUGUUGAUGAUAGAAUUCU   | 179  | 3.5 Translation | [ Symbols:   Zinc-finger domain of monoamine-oxidase A repressor R1 protein   chr1:25412816-25415530 FORWARD LENGTH=1539                                                                                                                                |
| AT1G67792 | UUUGUCGAACAUAGUACCUCA   | 119  | 3.5 Cleavage    | [ Symbols:   other RNA   chr1:25417609-25420229 FORWARD LENGTH=2524                                                                                                                                                                                     |
| AT1G67930 | UUCUGUAGCAGGAGGUUAUUCU  | 302  | 3.5 Cleavage    | [ Symbols:   Golgi transport complex protein-related   chr1:25474140-25477423 REVERSE LENGTH=2668                                                                                                                                                       |
| AT1G67960 | UGUCACGUAUUAUUCUUCU     | 123  | 3.5 Cleavage    | [ Symbols:   CONTAINS InterPro DOMAINs: Membrane protein,Tapt1/CMV receptor (InterPro:IPRO80010); Has 447 Blast hits in 176 species: Archae - 0; Bacteria - 0; Metazoa - 190; Fungi - 133; Plants - 49; Viruses - 0; Other Eukar                        |
| AT1G67980 | UUAACGACUUCUAGCCACGCU   | 3733 | 5 Cleavage      | [ Symbols: COAMT   coffeoyl-CoA 3-O-methyltransferase   chr1:25487714-25489158 FORWARD LENGTH=931                                                                                                                                                       |
| AT1G68170 | UUUAGGAUUGUGCAUAUGCA    | 1164 | 4 Cleavage      | [ Symbols:   nodulin MIN21 /EamA-like transporter family protein   chr1:25551922-25554258 FORWARD LENGTH=1074                                                                                                                                           |
| AT1G68510 | UGUGGUUGUAGUAGGACAUCU   | 111  | 3.5 Cleavage    | [ Symbols: LBD42   LOB domain-containing protein 42   chr1:25706882-25708255 FORWARD LENGTH=1104                                                                                                                                                        |
| AT1G68530 | UGUGGUUGUAGUAGGACAUCU   | 111  | 4 Cleavage      | [ Symbols: CUT1, POP1, CER6, G2, KCS6   3-keotacyl-CoA synthase 6   chr1:25712588-25714807 REVERSE LENGTH=2220                                                                                                                                          |
| AT1G68540 | UCAGUAGAUAUUGCAUAUUCU   | 104  | 3.5 Cleavage    | [ Symbols:   NAD(P)-binding Rossmann-fold superfamily protein   chr1:25720024-25721410 FORWARD LENGTH=1055                                                                                                                                              |
| AT1G68600 | UUGGCGCUCCACUUCUGCAAG   | 468  | 4.5 Translation | [ Symbols:   Aluminium activated malate transporter family protein   chr1:25759842-25762934 FORWARD LENGTH=1875                                                                                                                                         |
| AT1G68640 | UUACGGGUGAGAACAUAUAGCU  | 1291 | 4 Cleavage      | [ Symbols: PAN   bZIP transcription factor family protein   chr1:25769576-25772543 REVERSE LENGTH=1762                                                                                                                                                  |
| AT1G68690 | UGAGACACAACAGGGAGAUUJC  | 244  | 2.5 Cleavage    | [ Symbols:   Protein kinase superfamily protein   chr1:25788608-25792324 FORWARD LENGTH=3050                                                                                                                                                            |
| AT1G68720 | AUUGAUUUCUGACUCAAGGGC   | 128  | 4 Translation   | [ Symbols: TADA, ATTADA   tRNA arginine adenosine deaminase   chr1:25804418-25808982 FORWARD LENGTH=4215                                                                                                                                                |
| AT1G68750 | UCACUCGCAUCUUAAGAACUG   | 146  | 3 Cleavage      | [ Symbols: ATPPC4, PPC4   phosphoenolpyruvate carboxylase 4   chr1:25822942-25828107 REVERSE LENGTH=3102                                                                                                                                                |
| AT1G68780 | UUUUGUUGAUGAUAGAAUUCU   | 179  | 4 Cleavage      | [ Symbols:   RNI-like superfamily protein   chr1:25831803-25833844 REVERSE LENGTH=1886                                                                                                                                                                  |
| AT1G68820 | GCAAGUGAUGAUAAAAAGACA   | 100  | 3.5 Translation | [ Symbols:   Transmembrane Fragile-X-F associated protein   chr1:25865660-25868985 FORWARD LENGTH=1784                                                                                                                                                  |
| AT1G68872 | UCCCGGAUUGCGAAGAAGUA    | 113  | 4.5 Translation | [ Symbols:   Unknown gene   chr1:25890365-25891748 REVERSE LENGTH=1102                                                                                                                                                                                  |
| AT1G68930 | AUUUACUGAGCAGCGUACUCC   | 200  | 4.5 Cleavage    | [ Symbols:   pentatricopeptide (PPR) repeat-containing protein   chr1:25918314-25920545 FORWARD LENGTH=2232                                                                                                                                             |
| AT1G68980 | UUUUGCUUCUGUUGUACACCC   | 153  | 3.5 Cleavage    | [ Symbols:   Tetratricopeptide repeat (TPR)-like superfamily protein   chr1:25932998-25935030 FORWARD LENGTH=2033                                                                                                                                       |
| AT1G69030 | UUUGUUAUACUAGUGGUACCCC  | 165  | 3.5 Translation | [ Symbols:   BSD domain-containing protein   chr1:25947265-25949262 REVERSE LENGTH=1118                                                                                                                                                                 |
| AT1G69090 | UGACGCCAAUUCUUGCAUUUUU  | 154  | 4.5 Cleavage    | [ Symbols:   Protein of unknown function (DUF295)   chr1:25977501-25978706 REVERSE LENGTH=1206                                                                                                                                                          |
| AT1G69120 | CUAGAAUUCUUCUCCUUUCU    | 235  | 4 Translation   | [ Symbols: AP1, AGL7   K-box region and MADS-box transcription factor family protein   chr1:25982330-25986313 REVERSE LENGTH=1228                                                                                                                       |
| AT1G69210 | UGAAUUAUAAACUGAACCAUCC  | 263  | 3 Cleavage      | [ Symbols:   Uncharacterised protein family UPP090   chr1:26018438-26020058 REVERSE LENGTH=1153                                                                                                                                                         |
| AT1G69252 | AAUUAUAAACUGAACCAUCCU   | 203  | 3.5 Cleavage    | [ Symbols:   other RNA   chr1:26036733-26037659 FORWARD LENGTH=927                                                                                                                                                                                      |
| AT1G69280 | UUUUGUUCUUCUGUUGUACCCC  | 153  | 3.5 Cleavage    | [ Symbols:   unknown protein; BEST Arabidopsis thaliana protein match is: unknown protein (TAIR:AT2G03630.1); Has 885 Blast hits to 474 proteins in 40 species: Archae - 0; Bacteria - 4; Metazoa - 731; Fungi - 9; Plants - 68; Viruses - 0; Other Euk |
| AT1G69290 | UUUUGUUCUUCUGUUGUACCCC  | 153  | 3.5 Cleavage    | [ Symbols:   Pentatricopeptide repeat (PPR) superfamily protein   chr1:26047372-26049348 REVERSE LENGTH=1977                                                                                                                                            |
| AT1G69340 | UAAGCAUUUUGAUUACACCGGA  | 285  | 5 Cleavage      | [ Symbols:   ap1-1-p processing enzyme family protein   chr1:26065724-26069821 FORWARD LENGTH=2101                                                                                                                                                      |
| AT1G69380 | UGAAGGACAAGAUACAGCUGCU  | 415  | 3.5 Cleavage    | [ Symbols:   Protein of unknown function (DUF155)   chr1:26081566-26083066 REVERSE LENGTH=1460                                                                                                                                                          |
| AT1G69430 | UUGAGGACAUUCCACGACUAG   | 261  | 4 Cleavage      | [ Symbols:   unknown protein; BEST Arabidopsis thaliana protein match is: unknown protein (TAIR:AT1G26650.1); Has 216 Blast hits to 215 proteins in 17 species: Archae - 0; Bacteria - 0; Metazoa - 0; Fungi - 0; Plants - 216; Viruses - 0; Other Euk  |
| AT1G69440 | UUUGCCUUGUUAACUCGAGUA   | 114  | 3.5 Translation | [ Symbols: AGO7, ZIP   Argonaute family protein   chr1:26101527-26105166 REVERSE LENGTH=3161                                                                                                                                                            |
| AT1G69450 | UAGCUAACAGGAACUCUUCU    | 1828 | 3 Cleavage      | [ Symbols:   Early-responsive to dehydration stress protein (ERD4)   chr1:26107120-26110148 REVERSE LENGTH=2278                                                                                                                                         |
| AT1G69490 | UAUGGAUGAUGACGCAUUGGC   | 937  | 4 Cleavage      | [ Symbols: NAP, ANAC029, ATNAP   NAC-like, activated by AP3/PI   chr1:26122139-26123421 FORWARD LENGTH=1100                                                                                                                                             |
| AT1G69572 | UGAGCCGACAAAGUAUGUAUUC  | 111  | 3.5 Cleavage    | [ Symbols:   other RNA   chr1:26161599-26162761 FORWARD LENGTH=1064                                                                                                                                                                                     |
| AT1G69587 | UAGUAGCCGAGUAUACACCC    | 461  | 4.5 Cleavage    | [ Symbols:   Potential natural antisense gene, locus overlaps with AT1G69588   chr1:26175654-26179351 REVERSE LENGTH=874                                                                                                                                |
| AT1G69630 | CUCAGGCUCAUACUCCGACU    | 968  | 4 Cleavage      | [ Symbols:   F-box/RNI-like superfamily protein   chr1:26191640-26193174 REVERSE LENGTH=1356                                                                                                                                                            |
| AT1G69670 | AUACCAACCAUCGAAUUUUUCU  | 127  | 4 Cleavage      | [ Symbols: CUL3B, ATCUL3B   cullin 3B   chr1:26202031-26204442 REVERSE LENGTH=2337                                                                                                                                                                      |
| AT1G69710 | UCCUUAUCAGUUGGAAGAACGC  | 272  | 4 Cleavage      | [ Symbols:   Regulator of chromosome condensation (RCC1) family with FYVE zinc finger domain   chr1:26222072-26226652 FORWARD LENGTH=3501                                                                                                               |
| AT1G69770 | CUAGAAUUCUUCUCCUUUCU    | 235  | 3 Translation   | [ Symbols: CMT3   chromomethylase 3   chr1:26248318-26253585 REVERSE LENGTH=2764                                                                                                                                                                        |
| AT1G69800 | UCCUUAUCCAGUUGAAGAACGC  | 272  | 4 Cleavage      | [ Symbols:   Cystathionine beta-synthase (CBS) protein   chr1:26274230-26276329 REVERSE LENGTH=1621                                                                                                                                                     |
| AT1G69890 | UACAGAAUAGCUUAAGAAC     | 189  | 3 Cleavage      | [ Symbols:   Protein of unknown function (DUF569)   chr1:26323111-26324616 REVERSE LENGTH=1244                                                                                                                                                          |
| AT1G70080 | UGUGGUUAGCUUCUUAUGUCU   | 106  | 4.5 Cleavage    | [ Symbols:   Terpenoid cyclases/Protein prenyltransferases superfamily protein   chr1:26394669-26397565 REVERSE LENGTH=1836                                                                                                                             |
| AT1G70140 | UUUUGAUCCGAGGAUUAUGGAU  | 816  | 2.5 Cleavage    | [ Symbols:   ATFH8, FHB   formin 8   chr1:26412688-26415230 REVERSE LENGTH=2465                                                                                                                                                                         |
| AT1G70250 | UUUGAGAUAUCCCUUGUUAUCU  | 3917 | 5 Cleavage      | [ Symbols:   receptor serine/threonine kinase, putative   chr1:26452965-26456088 FORWARD LENGTH=2410                                                                                                                                                    |
| AT1G70320 | UUCGAGCAUAUAGAUUGUA     | 448  | 3.5 Cleavage    | [ Symbols: UPL2   ubiquitin-protein ligase 2   chr1:26488522-26501281 REVERSE LENGTH=11200                                                                                                                                                              |
| AT1G70518 | UCUGUAUGCAUAGCUGGGACU   | 466  | 5 Cleavage      | [ Symbols:   Unknown gene   chr1:26583570-26584684 FORWARD LENGTH=649                                                                                                                                                                                   |
| AT1G70550 | UUUGAUUACCGCAUAAACUCU   | 175  | 4.5 Cleavage    | [ Symbols:   Protein of Unknown Function (DUF239)   chr1:26597152-26600219 FORWARD LENGTH=1754                                                                                                                                                          |
| AT1G70610 | CGUCACUGCGAAUUCUGGAGC   | 272  | 3.5 Cleavage    | [ Symbols:   ATAPP1, TAP1   transporter associated with antigen processing protein 1   chr1:26621961-26626503 FORWARD LENGTH=2400                                                                                                                       |
| AT1G70650 | UCGAGCACUACGUACUCGGC    | 100  | 4 Translation   | [ Symbols:   Ran BP2/NZF zinc finger-like superfamily protein   chr1:26638075-26642268 FORWARD LENGTH=2190                                                                                                                                              |
| AT1G70990 | UUUAUACAGGAACUUCUGGCC   | 310  | 4 Cleavage      | [ Symbols:   proline-rich family protein   chr1:26767297-26768076 REVERSE LENGTH=780                                                                                                                                                                    |
| AT1G71210 | CAACUACACGAGGGACGACUG   | 198  | 4.5 Cleavage    | [ Symbols:   Pentatricopeptide repeat (PPR) superfamily protein   chr1:26838289-26841490 REVERSE LENGTH=3202                                                                                                                                            |
| AT1G71240 | UCAAACGAACUUCUGGCCUAGA  | 152  | 3.5 Cleavage    | [ Symbols:   Plant protein of unknown function (DUF639)   chr1:26855430-26859741 FORWARD LENGTH=2673                                                                                                                                                    |
| AT1G71340 | UUAGAAAGACUUGUGGAUACCC  | 926  | 4 Cleavage      | [ Symbols:   PLC-like phosphodiesterases superfamily protein   chr1:26885170-26888338 REVERSE LENGTH=2390                                                                                                                                               |
| AT1G71460 | UGAGUAGAAUUGGAUCAUAUC   | 114  | 4 Cleavage      | [ Symbols:   Pentatricopeptide repeat (PPR-like) superfamily protein   chr1:26927984-26930316 REVERSE LENGTH=2333                                                                                                                                       |
| AT1G71696 | UACUCGACCAACAACAGGCGU   | 106  | 4 Cleavage      | [ Symbols:   SOL1   carboxypeptidase D, putative   chr1:26966887-26970572 FORWARD LENGTH=1793                                                                                                                                                           |
| AT1G71800 | UUUCUAGGACAAGACUAGCU    | 1012 | 3 Cleavage      | [ Symbols:   CSTE64   cleavage stimulating factor 64   chr1:26999452-27002342 FORWARD LENGTH=1929                                                                                                                                                       |
| AT1G71820 | UACGAGACUUCAGCCACGACU   | 307  | 4.5 Cleavage    | [ Symbols:   SEC5   SEC6   chr1:27009634-27017108 FORWARD LENGTH=2915                                                                                                                                                                                   |
| AT1G71900 | UUUAUACACACACUUCUGGCU   | 310  | 3.5 Cleavage    | [ Symbols:   Protein of unknown function (DUF803)   chr1:27061486-27064496 FORWARD LENGTH=1743                                                                                                                                                          |
| AT1G72030 | CUCAACAUGUAUUAAGGGCUU   | 208  | 4.5 Cleavage    | [ Symbols:   Acyl-CoA N-acyltransferases (NAT) superfamily protein   chr1:27110865-27111932 FORWARD LENGTH=900                                                                                                                                          |
| AT1G72090 | UUUGAGGACUCCACCGACUG    | 261  | 4.5 Cleavage    | [ Symbols:   Methylthiotransferase   chr1:27123567-27126895 FORWARD LENGTH=1984                                                                                                                                                                         |

|           |                         |      |     |             |                                                                                                                                                                                                                                                              |
|-----------|-------------------------|------|-----|-------------|--------------------------------------------------------------------------------------------------------------------------------------------------------------------------------------------------------------------------------------------------------------|
| AT1G72175 | CUUCCCUAGAUAUUUUCCC     | 401  | 4   | Cleavage    | [ Symbols:   RING/U-box protein with domain of unknown function (DUF 1232)   chr1:27157875-27159558 FORWARD LENGTH=860                                                                                                                                       |
| AT1G72250 | UAACUACUACCCUUUGCAGCUC  | 727  | 3.5 | Translation | [ Symbols:   Di-glucone binding protein with Kinesin motor domain   chr1:27192902-27198314 FORWARD LENGTH=3784                                                                                                                                               |
| AT1G72270 | UAACUACUACCCUUUGCAGCUC  | 727  | 4   | Cleavage    | [ Symbols:   CONTAINS InterPro DOMAIN(s): Ribosome 60s biogenesis N-terminal (InterPro:IPR021714); BEST Arabidopsis thaliana protein match is: unknown protein (TAIR:AT4G27010.1); Has 772 Blast hits to 657 proteins in 120 species: Archae -               |
| AT1G72310 | UCCUUAUCCAGUCUGAAGAACGC | 272  | 5   | Translation | [ Symbols: ATLAS   RING/U-box superfamily protein   chr1:27225897-27227545 FORWARD LENGTH=1649                                                                                                                                                               |
| AT1G72390 | AUGGAAUUUAGUAUCCAGGCGUC | 196  | 3.5 | Cleavage    | [ Symbols:   CONTAINS InterPro DOMAIN(s): Spt20 family (InterPro:IPR021950); Has 8778 Blast hits to 7244 proteins in 477 species: Archae - 6; Bacteria - 326; Metazoa - 4198; Fungi - 1506; Plants - 923; Viruses - 22; Other Eukaryotes - 1797 (sour        |
| AT1G72470 | UUAGCAGACUACUAGCCCAACU  | 447  | 4   | Translation | [ Symbols: ATEX070D1, EXO70D1   exocyst subunit exo70 family protein D1   chr1:27283693-27285895 FORWARD LENGTH=2203                                                                                                                                         |
| AT1G72670 | UUUUAUGAGAGACGACUACCU   | 200  | 4.5 | Cleavage    | [ Symbols: iqd8   IQ-domain 8   chr1:27356683-27358853 REVERSE LENGTH=1656                                                                                                                                                                                   |
| AT1G72700 | UUUGCGUUAUUGAUCUGAGUA   | 114  | 3.5 | Cleavage    | [ Symbols:   IntPhase E1-E2 type family protein / haloacid dehalogenase-like hydrolase family protein   chr1:27365896-27371373 FORWARD LENGTH=4404                                                                                                           |
| AT1G72840 | UCUUAUUGACUUAUUGCUUACAC | 101  | 3.5 | Cleavage    | [ Symbols:   Disease resistance protein (TIR-NBS-LRR class)   chr1:27402937-27413851 REVERSE LENGTH=4008                                                                                                                                                     |
| AT1G72852 | UUGAGACCCGAGGAUGAUGACU  | 330  | 5   | Cleavage    | [ Symbols:   Potential natural antisense gene, locus overlaps with AT1G72850   chr1:27414415-27415173 REVERSE LENGTH=615                                                                                                                                     |
| AT1G72880 | UGAGCCGACAAAGUAUGAUUC   | 111  | 4.5 | Cleavage    | [ Symbols:   Survival protein SurE-like phosphatase/nucleotidase   chr1:27423385-27426135 REVERSE LENGTH=1565                                                                                                                                                |
| AT1G73040 | AUUUUGACUACUAGGAUACCCU  | 768  | 5   | Cleavage    | [ Symbols:   Mannose-binding lectin superfamily protein   chr1:27475060-27475962 REVERSE LENGTH=716                                                                                                                                                          |
| AT1G73150 | UUGGAGCCGUACUACUAGAGA   | 679  | 4   | Cleavage    | [ Symbols: GTE3   global transcription factor group E3   chr1:27504112-27506112 REVERSE LENGTH=1717                                                                                                                                                          |
| AT1G73230 | UGUGUGUACCUACUCCAGCUC   | 112  | 2.5 | Cleavage    | [ Symbols:   Nascent polypeptide-associated complex NAC   chr1:27540228-27541944 REVERSE LENGTH=901                                                                                                                                                          |
| AT1G73360 | UUUAUACAAACUUCUUGGCC    | 310  | 3.5 | Cleavage    | [ Symbols: HDG11, ED1, ATHDG11   homeodomain GLABROUS 11   chr1:27578696-27582521 REVERSE LENGTH=3067                                                                                                                                                        |
| AT1G73600 | UAUGGAGAUGAUCGCAUUGCC   | 937  | 4.5 | Cleavage    | [ Symbols:   S-adenosyl-L-methionine-dependent methyltransferases superfamily protein   chr1:27669152-27673572 FORWARD LENGTH=1759                                                                                                                           |
| AT1G73602 | UAUGGAGAUGAUCGCAUUGCC   | 937  | 4.5 | Cleavage    | [ Symbols: CPuORF32   conserved peptide upstream open reading frame 32   chr1:27670626-27673569 FORWARD LENGTH=1841                                                                                                                                          |
| AT1G73603 | UACCCGUACGUCGCUUACAA    | 192  | 5   | Cleavage    | [ Symbols: LCR64   low-molecular-weight cysteine-rich 64   chr1:27674288-27674953 FORWARD LENGTH=387                                                                                                                                                         |
| AT1G73810 | UAUUGACGUCGAGUAUGAGCCU  | 517  | 4   | Translation | [ Symbols:   Core-2/-l-branching beta-1,6-N-acetylglucosaminyltransferase family protein   chr1:27752400-27755297 REVERSE LENGTH=1452                                                                                                                        |
| AT1G73860 | UAACUACUACCCUUUGCAGCUC  | 727  | 3.5 | Translation | [ Symbols:   P-loop containing nucleoside triphosphate hydrolases superfamily protein   chr1:27770986-27776857 REVERSE LENGTH=3460                                                                                                                           |
| AT1G73920 | UGGCGCUAACUUCGCGAGGU    | 1187 | 4   | Cleavage    | [ Symbols:   alpha/beta-Hydrolases superfamily protein   chr1:27790875-27794914 FORWARD LENGTH=2650                                                                                                                                                          |
| AT1G73960 | UCUGGGAUGAUGGGAUUAUUAU  | 123  | 3   | Cleavage    | [ Symbols: TAF2   TBP-associated factor 2   chr1:27805045-27814446 REVERSE LENGTH=4254                                                                                                                                                                       |
| AT1G73980 | UACUUCGACGCUUUCUUAAGCC  | 526  | 3   | Cleavage    | [ Symbols:   Phosphoribosylkinase / Uridine kinase family   chr1:27820149-27824036 REVERSE LENGTH=2211                                                                                                                                                       |
| AT1G74050 | UUUUAUUGACUUGAUAAGGAC   | 265  | 3.5 | Translation | [ Symbols:   Ribosomal protein L6 family protein   chr1:27847047-27848806 REVERSE LENGTH=1037                                                                                                                                                                |
| AT1G74060 | UUUUAUUGACUUGAUAAGGAC   | 265  | 3.5 | Translation | [ Symbols:   Ribosomal protein L6 family protein   chr1:27848833-27851374 REVERSE LENGTH=977                                                                                                                                                                 |
| AT1G74090 | UGAGAAUAUUGACUUCAGACCU  | 137  | 3   | Cleavage    | [ Symbols: SOT18, ATST018, ATST58   desulfo-glucosylate sulfotransferase 18   chr1:27862909-27864193 FORWARD LENGTH=1285                                                                                                                                     |
| AT1G74120 | UAUGGAGAUGAUCGAAUUGGC   | 938  | 3.5 | Cleavage    | [ Symbols:   Mitochondrial transcription termination factor family protein   chr1:27871274-27873260 REVERSE LENGTH=1987                                                                                                                                      |
| AT1G74280 | UACCCGAGGAGUACUUAAGU    | 401  | 3   | Translation | [ Symbols:   alpha/beta-Hydrolases superfamily protein   chr1:27929662-27931364 FORWARD LENGTH=1453                                                                                                                                                          |
| AT1G74350 | AAACAGGACAAAGUACUCCGC   | 986  | 5   | Cleavage    | [ Symbols:   Intron maturase, type II family protein   chr1:27949022-27951283 REVERSE LENGTH=2262                                                                                                                                                            |
| AT1G74600 | UCGACACACUUGCUAUGAUCU   | 174  | 4   | Cleavage    | [ Symbols:   pentatricopeptide (PPR) repeat-containing protein   chr1:28025153-28027840 REVERSE LENGTH=2688                                                                                                                                                  |
| AT1G74680 | AUAGCUAACAAGAAUUGUUUUCU | 426  | 4.5 | Cleavage    | [ Symbols:   Exostosis family protein   chr1:28059188-28061119 FORWARD LENGTH=1861                                                                                                                                                                           |
| AT1G74880 | UUUGUUAUACUUGGUCACCC    | 138  | 3   | Cleavage    | [ Symbols: NDH-O   NAD(P)H-plastoquinone dehydrogenase complex subunit O   chr1:28129858-28131077 REVERSE LENGTH=788                                                                                                                                         |
| AT1G74950 | UGAGAUUGCUAGAGAAAGAG    | 101  | 3   | Translation | [ Symbols: JAZZ, TIFY10B   TIFY domain/Divergent CCT motif family protein   chr1:28148575-28150444 REVERSE LENGTH=1280                                                                                                                                       |
| AT1G75100 | UCUAUGUACAUUUUUUGCGAC   | 427  | 4.5 | Cleavage    | [ Symbols: JAC1   -domain protein required for chloroplast accumulation response 1   chr1:28190816-28193800 REVERSE LENGTH=2279                                                                                                                              |
| AT1G75140 | UUUUUUGCGAGUAUAGGACU    | 107  | 3   | Cleavage    | [ Symbols:   unknown protein; LOCATED IN: endoplasmic reticulum; EXPRESSED IN: 24 plant structures; EXPRESSED DURING: 13 growth stages; BEST Arabidopsis thaliana protein match is: unknown protein (TAIR:AT1G19370.1); Has 51 Blast hits t                  |
| AT1G75150 | UAACUACUACCCUUUGCAGCUC  | 727  | 3   | Translation | [ Symbols:   unknown protein; Has 38228 Blast hits to 24529 proteins in 1168 species: Archae - 169; Bacteria - 4103; Metazoa - 14594; Fungi - 5866; Plants - 1861; Viruses - 317; Other Eukaryotes - 11318 (source: NCBI BLINK).   chr1:28204387-28          |
| AT1G75250 | AUAGCUAACAAGAAUUGUUUUCU | 426  | 3   | Cleavage    | [ Symbols: ATR16, RSM3, RL6   RAD-like 6   chr1:28245073-28245453 REVERSE LENGTH=381                                                                                                                                                                         |
| AT1G75380 | UAUAGGGGCUUGAAAGAAAGU   | 252  | 4   | Cleavage    | [ Symbols: ATRB01, BB01   bifunctional nuclease in basal defense response 1   chr1:28281389-28284036 REVERSE LENGTH=1462                                                                                                                                     |
| AT1G75490 | UUUGGACUUAUGGAUACCCUA   | 227  | 5   | Cleavage    | [ Symbols:   Integrate-type DNA-binding superfamily protein   chr1:28335502-28336708 FORWARD LENGTH=1205                                                                                                                                                     |
| AT1G75560 | UGUGACACCGAAUUGCAUUGCG  | 114  | 4.5 | Cleavage    | [ Symbols:   zinc knuckle (CCHC-type) family protein   chr1:28371141-28373241 REVERSE LENGTH=1134                                                                                                                                                            |
| AT1G75640 | UAGCUAACAGAAUUGCUUUUCU  | 1828 | 4.5 | Cleavage    | [ Symbols:   Leucine-rich receptor-like protein kinase family protein   chr1:28403466-28407051 REVERSE LENGTH=3586                                                                                                                                           |
| AT1G76160 | UCUAGUUCGGGCUUUAUUGAC   | 163  | 4   | Cleavage    | [ Symbols: sks5   SKUS similar 5   chr1:28577942-28581133 REVERSE LENGTH=2008                                                                                                                                                                                |
| AT1G76210 | UUUUUAUUAUACUUGUACGACU  | 133  | 4   | Cleavage    | [ Symbols:   Arabidopsis protein of unknown function (DUF241)   chr1:28594950-28595981 REVERSE LENGTH=1032                                                                                                                                                   |
| AT1G76270 | UUACCCUACUUGCGUUAUACAA  | 130  | 4.5 | Cleavage    | [ Symbols:   O-fucosyltransferase family protein   chr1:28613207-28616739 REVERSE LENGTH=2268                                                                                                                                                                |
| AT1G76405 | UCUGGGUAUGGGAUUAUUAUUA  | 123  | 4.5 | Translation | [ Symbols:   unknown protein; FUNCTIONS IN: molecular_function unknown; INVOLVED IN: biological_process unknown; LOCATED IN: chloroplast envelope; EXPRESSED IN: 21 plant structures; EXPRESSED DURING: 13 growth stages; BEST Arabid                        |
| AT1G76580 | UUUCUUGACUUGAUAUGCCGCU  | 355  | 5   | Cleavage    | [ Symbols:   Squamosa promoter-binding protein-like (SBP domain) transcription factor family protein   chr1:28734234-28738917 FORWARD LENGTH=3686                                                                                                            |
| AT1G76740 | UCUAGUUCGGGCUUUAUUGAC   | 163  | 3.5 | Translation | [ Symbols:   unknown protein; BEST Arabidopsis thaliana protein match is: unknown protein (TAIR:AT1G76840.1); Has 3683 Blast hits to 2942 proteins in 407 species: Archae - 9; Bacteria - 440; Metazoa - 1472; Fungi - 269; Plants - 192; Viruses - 8        |
| AT1G76750 | UAGAAGAACAAUUAUUGCAGUC  | 415  | 3.5 | Cleavage    | [ Symbols:   Protein of unknown function (DUF1278)   chr1:28811040-28811721 FORWARD LENGTH=682                                                                                                                                                               |
| AT1G76810 | UAACAAGAAUUCUUCUUAUUCU  | 235  | 3   | Cleavage    | [ Symbols:   eukaryotic translation initiation factor 2 (eIF-2) family protein   chr1:28831003-28836586 REVERSE LENGTH=4395                                                                                                                                  |
| AT1G76870 | UUUGGCGCUAACUUCGCAAG    | 3787 | 5   | Cleavage    | [ Symbols:   BEST Arabidopsis thaliana protein match is: sequence-specific DNA binding transcription factors (TAIR:AT1G21200.1); Has 406 Blast hits to 351 proteins in 76 species: Archae - 0; Bacteria - 2; Metazoa - 137; Fungi - 14; Plants - 127; Vi     |
| AT1G76920 | UCUGUAUGCAUUAUUGGAGAC   | 1212 | 4   | Cleavage    | [ Symbols:   F-box family protein   chr1:28892062-28893676 FORWARD LENGTH=1615                                                                                                                                                                               |
| AT1G77020 | UUUAUGAGACUUAUGCCAGCUC  | 149  | 4.5 | Cleavage    | [ Symbols:   DNAI1 heat shock N-terminal domain-containing protein   chr1:28944843-28947031 REVERSE LENGTH=1517                                                                                                                                              |
| AT1G77080 | UUGUAGGAGGACUACGACACU   | 949  | 5   | Translation | [ Symbols: MAF1, FLN, AGL27   K-box region and MADS-box transcription factor family protein   chr1:28955637-28960096 FORWARD LENGTH=872                                                                                                                      |
| AT1G77130 | CGUCUUGCAUUAUUGCUGGAG   | 272  | 2.5 | Cleavage    | [ Symbols: PGSP2, GLX3   plant glycogen-like starch initiation protein 2   chr1:28978894-28981345 REVERSE LENGTH=2146                                                                                                                                        |
| AT1G77138 | CGUCUUGCAUUAUUGCUGGAG   | 272  | 5   | Cleavage    | [ Symbols:   other RNA   chr1:28982766-28983469 FORWARD LENGTH=704                                                                                                                                                                                           |
| AT1G77180 | ACUGAGCCGCUAUGUAUAGCG   | 153  | 4   | Translation | [ Symbols: SKP   chromatin protein family   chr1:28999608-29002135 REVERSE LENGTH=2405                                                                                                                                                                       |
| AT1G77260 | UGAGGUCGAGUAGAGCAUAUUA  | 117  | 4.5 | Cleavage    | [ Symbols:   S-adenosyl-L-methionine-dependent methyltransferases superfamily protein   chr1:29023772-29026957 REVERSE LENGTH=2415                                                                                                                           |
| AT1G77290 | AAAUAAACUUGAAGCAUCCUCU  | 203  | 3   | Cleavage    | [ Symbols:   Glutathione S-transferase family protein   chr1:29038375-29039838 FORWARD LENGTH=1366                                                                                                                                                           |
| AT1G77470 | UACGCUAAGGGAGUAUUGCUC   | 122  | 4   | Translation | [ Symbols: RFC3, RFC5   replication factor C subunit 3   chr1:29111948-29114435 REVERSE LENGTH=1468                                                                                                                                                          |
| AT1G77500 | UGAAUGACAACUUGGACAGCUC  | 583  | 3.5 | Cleavage    | [ Symbols:   Protein of unknown function (DUF630 and DUF632)   chr1:29121489-29125191 FORWARD LENGTH=3158                                                                                                                                                    |
| AT1G77510 | UGAGAUUGCUAAGGAAAGAG    | 101  | 3   | Cleavage    | [ Symbols: ATPDIL-2, PD16, ATPD16, PDIL-2   PDI-like 1-2   chr1:29126650-29129612 FORWARD LENGTH=1798                                                                                                                                                        |
| AT1G77620 | UUACCCGUAGCGGUUUAUACAG  | 2330 | 4.5 | Translation | [ Symbols:   P-loop containing nucleoside triphosphate hydrolases superfamily protein   chr1:29167764-29172867 REVERSE LENGTH=3626                                                                                                                           |
| AT1G77660 | UUGGCAUCGAAUUGAUAUCU    | 1059 | 3.5 | Cleavage    | [ Symbols:   Histone H3 K4-specific methyltransferase SET7/9 family protein   chr1:29185899-29187825 REVERSE LENGTH=1765                                                                                                                                     |
| AT1G77710 | UUAGACCCGAGGAUGAUGGAC   | 291  | 3.5 | Translation | [ Symbols:   CONTAINS InterPro DOMAIN(s): Ubiquitin-like, Ufm1 (InterPro:IPR005375); Has 244 Blast hits to 244 proteins in 106 species: Archae - 0; Bacteria - 0; Metazoa - 149; Fungi - 0; Plants - 47; Viruses - 0; Other Eukaryotes - 48 (source: NCE     |
| AT1G77960 | CGAGAAUUCGACGGAGCUUUCU  | 3198 | 3   | Cleavage    | [ Symbols:   unknown protein; BEST Arabidopsis thaliana protein match is: unknown protein (TAIR:AT1G28630.4); Has 13187 Blast hits to 6837 proteins in 407 species: Archae - 0; Bacteria - 447; Metazoa - 4509; Fungi - 1333; Plants - 399; Viruses          |
| AT1G78080 | UUUGGUUCUGAGUCCCGCCUC   | 669  | 3.5 | Cleavage    | [ Symbols: RAP2.4   related to AP2 4   chr1:29364249-29366073 FORWARD LENGTH=1825                                                                                                                                                                            |
| AT1G78130 | UACACAAGGGGCUUCGCGACC   | 211  | 4.5 | Translation | [ Symbols: UNEZ   Major facilitator superfamily protein   chr1:29400140-29401902 FORWARD LENGTH=1592                                                                                                                                                         |
| AT1G78190 | UUUGGUCAGCAUUAUCCUUAU   | 119  | 4.5 | Cleavage    | [ Symbols:   Trm112p-like protein   chr1:29418620-29418994 REVERSE LENGTH=375                                                                                                                                                                                |
| AT1G78220 | UGAAGGAUUUGGGUUAUACCA   | 474  | 4   | Cleavage    | [ Symbols:   RNA-binding (RRM/RBD) motifs) family protein   chr1:29425721-29427181 REVERSE LENGTH=738                                                                                                                                                        |
| AT1G78260 | UUUGGUCUUGGCUUAUUAAGAG  | 192  | 4   | Translation | [ Symbols:   RNA-binding (RRM/RBD) motifs) family protein   chr1:29446805-29445015 FORWARD LENGTH=1530                                                                                                                                                       |
| AT1G78300 | UAUGGAGAUAUUGCAUUGGAG   | 837  | 4   | Cleavage    | [ Symbols: GRF2, 14-3-3OMEGA, GF14 OMEGA   general regulatory factor 2   chr1:29465671-29466385 FORWARD LENGTH=1325                                                                                                                                          |
| AT1G78310 | CUUGGAGGACGUUAGCAUUAU   | 113  | 3.5 | Translation | [ Symbols:   VQ motif-containing protein   chr1:29463656-29465053 REVERSE LENGTH=1398                                                                                                                                                                        |
| AT1G78380 | UUUGAGACUUCUUGACCCGGA   | 154  | 5   | Translation | [ Symbols: ATGSTU19, GST8, GSTU19   glutathione S-transferase TAU 19   chr1:29486413-29487906 REVERSE LENGTH=993                                                                                                                                             |
| AT1G78470 | AUUUUAACUUAUUGGAUACCCU  | 768  | 5   | Cleavage    | [ Symbols:   BEST Arabidopsis thaliana protein match is: F-box family protein (TAIR:AT1G67390.1); Has 40 Blast hits to 40 proteins in 4 species: Archae - 0; Bacteria - 0; Metazoa - 0; Fungi - 0; Plants - 40; Viruses - 0; Other Eukaryotes - 0 (source: N |
| AT1G78870 | UACGUACUUGGGAUUAUCCUGGA | 271  | 4   | Cleavage    | [ Symbols: UBQC35, UBQC13A   ubiquitin-conjugating enzyme 35   chr1:29650455-29652593 FORWARD LENGTH=1089                                                                                                                                                    |
| AT1G78915 | UGAAUUCUGGUAUACUUGCAGC  | 197  | 4.5 | Cleavage    | [ Symbols:   Tetraatricopeptide repeat (TPR)-like superfamily protein   chr1:29667619-29671219 REVERSE LENGTH=1457                                                                                                                                           |
| AT1G78920 | UUUAAACACGAGGACUUUUGCG  | 115  | 3.5 | Cleavage    | [ Symbols: AVP2, AVP1L, AVHP2.1, VHP2.1, VP2   vacuolar H+-pyrophosphatase 2   chr1:29671493-29676992 FORWARD LENGTH=3093                                                                                                                                    |
| AT1G79010 | UCUGGUAUGAUGGGAUUAUUAU  | 123  | 4   | Cleavage    | [ Symbols:   Alpha-helical ferredoxin   chr1:29724879-29727028 REVERSE LENGTH=1023                                                                                                                                                                           |
| AT1G79090 | UAAGACUGAGAUACGGGUGGCU  | 152  | 5   | Cleavage    | [ Symbols:   FUNCTIONS IN: molecular_function unknown; INVOLVED IN: biological_process unknown; LOCATED IN: cellular_component unknown; EXPRESSED IN: 25 plant structures; EXPRESSED DURING: 15 growth stages; CONTAINS InterPro Di                          |
| AT1G79150 | UCUUAUGUUGCUAUGGUCGCA   | 1437 | 3   | Cleavage    | [ Symbols:   binding   chr1:29772588-29777989 REVERSE LENGTH=2736                                                                                                                                                                                            |
| AT1G79280 | UCCAUGUCGAAGAACGCGGAAC  | 166  | 4   | Cleavage    | [ Symbols: NUA, ATPTR   nuclear pore anchor   chr1:29819176-29832978 REVERSE LENGTH=6451                                                                                                                                                                     |
| AT1G79580 | UUUGAGCACUUAUACAGCAGG   | 132  | 3.5 | Cleavage    | [ Symbols: SMB   NAC (No Apical Meristem) domain transcriptional regulator superfamily protein   chr1:29940932-29943602 REVERSE LENGTH=1338                                                                                                                  |
| AT1G79740 | UGUGACACCGAUUCUGAUAGC   | 115  | 2.5 | Translation | [ Symbols:   hAT transposon superfamily   chr1:30004367-30007020 REVERSE LENGTH=2041                                                                                                                                                                         |
| AT1G79810 | UUACGGGUGAGAAACAUUGACU  | 1291 | 3.5 | Cleavage    | [ Symbols: TED3, ATPX2, ATPX2   Pex2/Pex12 N-terminal domain-containing protein / zinc finger (C3HC4-type RING finger) family protein   chr1:30019744-30022486 FORWARD LENGTH=1532                                                                           |
| AT1G79890 | UGAAGGACAAGCUACGUGUCU   | 1483 | 4   | Cleavage    | [ Symbols:   RAD3-like DNA-binding helicase protein   chr1:30048655-30052203 FORWARD LENGTH=2649                                                                                                                                                             |
| AT1G79910 | UAUCUAGAAACUACAAACGA    | 113  | 3.5 | Cleavage    | [ Symbols:   Regulator of Vps4 activity in the MVB pathway protein   chr1:30054884-30057170 FORWARD LENGTH=1467                                                                                                                                              |
| AT1G79970 | UAUGAUUUAGAAUUGUUGCCUC  | 196  | 4   | Translation | [ Symbols:   unknown protein; FUNCTIONS IN: molecular_function unknown; INVOLVED IN: biological_process unknown; LOCATED IN: chloroplast; EXPRESSED DURING: 13 growth stages; BEST Arabidopsis thali                                                         |
| AT1G80000 | UUAGAGAUUCCCGUUAUACUG   | 3917 | 4   | Cleavage    | [ Symbols:   CASC3/Barents eIF4AIII binding   chr1:30092924-30097165 FORWARD LENGTH=2345                                                                                                                                                                     |
| AT1G80260 | UAUGGAGAUGAUCGAAUGGCC   | 152  | 5   | Cleavage    | [ Symbols:   emb1427   Spc97 / Spc98 family of spindle pole body (SPB) component   chr1:30175785-30180681 FORWARD LENGTH=3297                                                                                                                                |

|           |                         |       |                 |                                                                                                                                                                                                                                                              |
|-----------|-------------------------|-------|-----------------|--------------------------------------------------------------------------------------------------------------------------------------------------------------------------------------------------------------------------------------------------------------|
| AT1G80280 | UAUCUCGAGAGCGGUGCGGCC   | 101   | 4.5 Translation | [ Symbols:   alpha/beta-Hydrolases superfamily protein   chr1:30183541-30186586 REVERSE LENGTH=2687                                                                                                                                                          |
| AT1G80300 | UGAGACACAAACGAGGAGAUUC  | 244   | 3 Translation   | [ Symbols: NTF1, ATNTT1   nucleotide transporter 1   chr1:30191856-30194519 FORWARD LENGTH=2212                                                                                                                                                              |
| AT1G80380 | UAUGCAUAUUCUGGCAUAUACC  | 333   | 3 Cleavage      | [ Symbols:   P-loop containing nucleoside triphosphate hydrolases superfamily protein   chr1:30217219-30220004 FORWARD LENGTH=1422                                                                                                                           |
| AT1G80570 | UUUGAUUCCAGCGGUAUAACUC  | 175   | 3 Translation   | [ Symbols:   RNI-like superfamily protein   chr1:30290454-30292418 FORWARD LENGTH=1837                                                                                                                                                                       |
| AT1G80630 | UUUGAUCCGAGGAUGAUGGAU   | 112   | 4.5 Translation | [ Symbols:   RNI-like superfamily protein   chr1:30308696-30310656 REVERSE LENGTH=1961                                                                                                                                                                       |
| AT1G80640 | AUCCAAGUAGCGUACUUCUAG   | 1104  | 3.5 Cleavage    | [ Symbols:   Protein kinase superfamily protein   chr1:30311666-30314375 FORWARD LENGTH=1730                                                                                                                                                                 |
| AT1G80720 | CAACGCCUCUGAUACAUCUUCG  | 133   | 3.5 Translation | [ Symbols:   Mitochondrial glycoprotein family protein   chr1:30336138-30337565 FORWARD LENGTH=942                                                                                                                                                           |
| AT1G80750 | CUCAACAGUUAUAGGGGCUUC   | 208   | 4 Cleavage      | [ Symbols:   Ribosomal protein L30/L7 family protein   chr1:30348801-30350564 FORWARD LENGTH=975                                                                                                                                                             |
| AT1G80790 | UUUGCGAGGAGGCGUUCUCCG   | 112   | 3 Cleavage      | [ Symbols:   X/Y/S domain-containing protein   chr1:30359723-30363307 FORWARD LENGTH=2314                                                                                                                                                                    |
| AT1G80800 | UUAAGUACAACUUGCAAGUCU   | 583   | 5 Cleavage      | [ Symbols:   pseudogene, 40S ribosomal protein S12 (RPS12B), similar to ribosomal protein S12 GB:AA039838 Gi:5106775 from (Hordeum vulgare); blastp match of 65% identity and 4.7e-12 P-value to GP[23617253 dbj][BAC20920.1][ AP005764                      |
| AT1G80810 | UUUGGUUCUGAGUCCCCGCCU   | 669   | 3.5 Cleavage    | [ Symbols:   Tudor/PWWP/MBT superfamily protein   chr1:30365287-30368898 FORWARD LENGTH=2418                                                                                                                                                                 |
| AT2G01260 | UGGGCGUCCUAGCGCAAGG     | 10625 | 4.5 Translation | [ Symbols:   Protein of unknown function (DUF789)   chr2:135244-137803 REVERSE LENGTH=1573                                                                                                                                                                   |
| AT2G01340 | UUAACUCUACCCUUGGACAUCA  | 240   | 4.5 Translation | [ Symbols: AT17.1   Encodes a protein whose expression is responsive to nematode infection.   chr2:163954-165290 FORWARD LENGTH=930                                                                                                                          |
| AT2G01422 | UAGGCGUAGAUUGGAGCGCCU   | 875   | 4 Cleavage      | [ Symbols:     chr2:183940-184734 FORWARD LENGTH=795                                                                                                                                                                                                         |
| AT2G01460 | UGCCAUGAUUGAGAGCGCCU    | 164   | 3.5 Cleavage    | [ Symbols:   P-loop containing nucleoside triphosphate hydrolases superfamily protein   chr2:206136-211919 FORWARD LENGTH=3019                                                                                                                               |
| AT2G01580 | UGGCAGUAGGAGUACACGACU   | 163   | 4.5 Cleavage    | [ Symbols:   unknown protein; BEST Arabidopsis thaliana protein match is: unknown protein (TAIR:ATG07510.2); Has 129 Blast hits to 129 proteins in 12 species: Archae - 0; Bacteria - 0; Metazoa - 0; Fungi - 0; Plants - 129; Viruses - 0; Other Euk        |
| AT2G01670 | UAGAUAACAAGAACUUCUUCU   | 107   | 3.5 Cleavage    | [ Symbols: atnudt17, NUOT17   nudix hydrolase homolog 17   chr2:296510-298101 REVERSE LENGTH=1211                                                                                                                                                            |
| AT2G01830 | UCCGCUAGAUUAUCAAACU     | 281   | 5 Translation   | [ Symbols: WOL, CRE1, WOL1, AHK4, ATCRE1   CHASE domain containing histidine kinase protein   chr2:363003-367680 REVERSE LENGTH=3637                                                                                                                         |
| AT2G01880 | UCGAGGGCAGGAAUCAUUGACU  | 334   | 3 Cleavage      | [ Symbols: PAP7, ATPAP7   purple acid phosphatase 7   chr2:391423-394032 REVERSE LENGTH=1192                                                                                                                                                                 |
| AT2G01905 | UUUCUCCGACUGGAUGAGACU   | 102   | 4 Cleavage      | [ Symbols: CYC18   cyclin J18   chr2:410327-415330 FORWARD LENGTH=2604                                                                                                                                                                                       |
| AT2G01940 | UUUGAUCCGAGGAUGAUGGUC   | 816   | 3 Translation   | [ Symbols: SGR5, ATIDD15   C2H2-like zinc finger protein   chr2:432849-435077 FORWARD LENGTH=1501                                                                                                                                                            |
| AT2G01950 | UAUCUCUGAGAGCGGUGCGGCG  | 334   | 3 Cleavage      | [ Symbols: VH1, BR12   BRK1-like 2   chr2:440636-444276 REVERSE LENGTH=3641                                                                                                                                                                                  |
| AT2G02020 | UUUGCGGUAUGGAUGUAUACAAC | 101   | 2.5 Cleavage    | [ Symbols:   Major facilitator superfamily protein   chr2:479101-481185 FORWARD LENGTH=1645                                                                                                                                                                  |
| AT2G02070 | UGAGAUUGGCUAGAGAAAGAG   | 101   | 3 Cleavage      | [ Symbols: AID05, ID05   indeterminate[D]-domain 5   chr2:505487-509425 FORWARD LENGTH=2116                                                                                                                                                                  |
| AT2G02080 | UUGGUGUACUCCUCCACUCU    | 112   | 3 Translation   | [ Symbols: AID04, ID04   indeterminate[D]-domain 4   chr2:518159-521707 REVERSE LENGTH=1844                                                                                                                                                                  |
| AT2G02170 | GCAAGUGAUGAUAAAAGACA    | 100   | 3 Cleavage      | [ Symbols:   Remorin family protein   chr2:556493-558715 REVERSE LENGTH=1668                                                                                                                                                                                 |
| AT2G02180 | UUUGGCGUGAGGUGGAGACACC  | 133   | 4.5 Cleavage    | [ Symbols: TOM3   tobamovirus multiplication protein 3   chr2:560864-563233 FORWARD LENGTH=1296                                                                                                                                                              |
| AT2G02250 | UGGAGAUGAUGAUUAUGCGGCU  | 109   | 4 Cleavage      | [ Symbols: ATPP2-B2, PP2-B2   phloem protein 2-B2   chr2:594655-598552 REVERSE LENGTH=960                                                                                                                                                                    |
| AT2G02370 | CUUCGACUGAGGUAAGCGCCU   | 234   | 5 Cleavage      | [ Symbols:   SNARE associated Golgi protein family   chr2:621180-623285 FORWARD LENGTH=1379                                                                                                                                                                  |
| AT2G02400 | UCAUAUGGACUUGGCUACACC   | 101   | 3 Translation   | [ Symbols:   NAD(P)-binding Rossmann-fold superfamily protein   chr2:631236-632575 REVERSE LENGTH=1260                                                                                                                                                       |
| AT2G02430 | UCUAGUUGCGGUUCUUCAGAG   | 300   | 4 Cleavage      | [ Symbols:   pseudogene, arginyl-tRNA synthetase   chr2:635456-636638 FORWARD LENGTH=1183                                                                                                                                                                    |
| AT2G02510 | UGACACGAAUUCUGAUGGCUU   | 823   | 2.5 Cleavage    | [ Symbols:   NADH dehydrogenase (ubiquinone)s   chr2:673305-674740 FORWARD LENGTH=506                                                                                                                                                                        |
| AT2G02540 | ACAAAACGUUUGAACAAAGG    | 1107  | 4.5 Cleavage    | [ Symbols: ATHB21, ZFH04, HB21, ZHD3   homeobox protein 21   chr2:683647-685309 FORWARD LENGTH=1205                                                                                                                                                          |
| AT2G02560 | UAUCUCGAGAGCGGUGCGUGCG  | 334   | 5 Cleavage      | [ Symbols: CAND1, ATCAND1, ETA2, TIP120, HVE   cullin-associated and neddylation dissociated   chr2:689788-697596 FORWARD LENGTH=4089                                                                                                                        |
| AT2G02610 | UUUGGCGUCAAACUUGCAAG    | 3787  | 4 Translation   | [ Symbols:   Cysteine/Histidine-rich C1 domain family protein   chr2:710712-712819 FORWARD LENGTH=2108                                                                                                                                                       |
| AT2G02620 | UACCGGAGGACUGUACGAGAU   | 153   | 4.5 Translation | [ Symbols:   Cysteine/Histidine-rich C1 domain family protein   chr2:717256-719380 FORWARD LENGTH=2125                                                                                                                                                       |
| AT2G02630 | UGGGCGUCAAUCUGCAAGG     | 10625 | 4.5 Cleavage    | [ Symbols:   Cysteine/Histidine-rich C1 domain family protein   chr2:723565-725620 FORWARD LENGTH=2056                                                                                                                                                       |
| AT2G02640 | UUGGCGGCUCAACUCUGCAAGG  | 4868  | 4.5 Translation | [ Symbols:   Cysteine/Histidine-rich C1 domain family protein   chr2:732388-734271 FORWARD LENGTH=1884                                                                                                                                                       |
| AT2G02680 | UUUGGGGCUCAACUCUGCAAGG  | 2546  | 4.5 Translation | [ Symbols:   Cysteine/Histidine-rich C1 domain family protein   chr2:745775-748573 FORWARD LENGTH=1950                                                                                                                                                       |
| AT2G02780 | UGGGCGCUUAUUCUGGUGU     | 115   | 3.5 Translation | [ Symbols:   Leucine-rich repeat protein kinase family protein   chr2:781847-784646 REVERSE LENGTH=2314                                                                                                                                                      |
| AT2G02835 | UCGACACACUGUAUGAUUCU    | 174   | 4 Cleavage      | [ Symbols:   unknown protein; BEST Arabidopsis thaliana protein match is: unknown protein (TAIR:ATG09804.1); Has 30201 Blast hits to 17322 proteins in 780 species: Archae - 12; Bacteria - 1396; Metazoa - 17338; Fungi - 3422; Plants - 5037; V            |
| AT2G02880 | UUUUGUAUAACUGAUGUACACC  | 165   | 3.5 Translation | [ Symbols:   emb1579   ATP/GTP-binding protein family   chr2:951933-959188 FORWARD LENGTH=4398                                                                                                                                                               |
| AT2G03150 | UGAGUAGAUUCUGAUCAUAUC   | 114   | 3.5 Cleavage    | [ Symbols:   Glycosyltransferase family 61 protein   chr2:1022287-1024391 REVERSE LENGTH=1486                                                                                                                                                                |
| AT2G03360 | UAUGCAGACACUACGCUACUGU  | 142   | 5 Cleavage      | [ Symbols:   uvrB/uvrC motif-containing protein   chr2:1030402-1032625 REVERSE LENGTH=1210                                                                                                                                                                   |
| AT2G03390 | UCAUCUUCUGUAGCUUCCGUC   | 210   | 2.5 Cleavage    | [ Symbols:   ELM2 domain-containing protein   chr2:1045456-1047684 REVERSE LENGTH=1707                                                                                                                                                                       |
| AT2G03470 | UCUCAUGAGUUCUAGUUCGCA   | 1437  | 4 Cleavage      | [ Symbols:   ATPU51, UPS1   ureide permease 1   chr2:1094757-1096968 FORWARD LENGTH=1802                                                                                                                                                                     |
| AT2G03590 | CAACUACAACGAGGGGACUG    | 198   | 4 Translation   | [ Symbols:   SPR1, SKU6   spiral1   chr2:1120922-1122055 FORWARD LENGTH=854                                                                                                                                                                                  |
| AT2G03680 | UCUAGUUCACAUUUUUCGGAG   | 427   | 5 Cleavage      | [ Symbols:   ACRS   ACT domain repeat 5   chr2:1137635-1140186 REVERSE LENGTH=1800                                                                                                                                                                           |
| AT2G03730 | UUUAUUCACACAGUGGACUGUG  | 118   | 4.5 Cleavage    | [ Symbols:   ST, ATST1, RAR047, ST1, AITSOT1, AITSOT12, SOT12   sulphotransferase 12   chr2:1149337-1150663 REVERSE LENGTH=1327                                                                                                                              |
| AT2G03760 | UUGGAGAAUCCUUGACCGCA    | 1272  | 3.5 Cleavage    | [ Symbols:   18S pre-ribosomal assembly protein gar2-related   chr2:1162523-1164573 FORWARD LENGTH=1787                                                                                                                                                      |
| AT2G03810 | UCUGAAUCUAGGACCCCAAA    | 493   | 4 Cleavage      | [ Symbols:   Encodes a defensin-like (DEF1) family protein.   chr2:1243663-1243992 FORWARD LENGTH=330                                                                                                                                                        |
| AT2G03958 | UUAACAAGCCUGAUGAAGUUC   | 102   | 5 Cleavage      | [ Symbols:   Defensin-like (DEF1) family protein   chr2:1315860-1316296 FORWARD LENGTH=333                                                                                                                                                                   |
| AT2G04046 | UGAAGGACAGCUCAGCGUGCU   | 1483  | 3.5 Cleavage    | [ Symbols:   MATE efflux family protein   chr2:1337386-1339270 REVERSE LENGTH=1431                                                                                                                                                                           |
| AT2G04050 | UUGUGAAUCCUGUAGUUGUUA   | 152   | 4 Translation   | [ Symbols:   MATE efflux family protein   chr2:1376890-1379130 REVERSE LENGTH=1661                                                                                                                                                                           |
| AT2G04190 | UGACAUCCGCUAGGUCUGGAG   | 378   | 4 Cleavage      | [ Symbols:   LACS8   AMP-dependent synthetase and ligase family protein   chr2:1515828-1519307 FORWARD LENGTH=2406                                                                                                                                           |
| AT2G04350 | UAUCUCGAGAGCGGUGUGCGCC  | 101   | 5 Cleavage      | [ Symbols:   LACS8   AMP-dependent synthetase and ligase family protein   chr2:1515828-1519307 FORWARD LENGTH=2406                                                                                                                                           |
| AT2G04400 | UAGGCGUAGAUUUGAGCGCCU   | 875   | 4 Cleavage      | [ Symbols:   Aldolase-type TIM barrel family protein   chr2:1531148-1533737 FORWARD LENGTH=1428                                                                                                                                                              |
| AT2G04520 | UGAGCGGACCAAGAGUAGUUAUC | 111   | 4.5 Cleavage    | [ Symbols:   Nucleic acid-binding, OB-fold-like protein   chr2:1574592-1575863 FORWARD LENGTH=817                                                                                                                                                            |
| AT2G04720 | UUCGACGCUUUGUAGGCCAAC   | 156   | 4.5 Cleavage    | [ Symbols:   pseudogene, similar to GTP-binding protein G1:6624302 from (Carica papaya); blastp match of 60% identity and 5.0e-31 P-value to GP[6624302 dbj][BA884897.1][ AB0355919 small GTP-binding protein (                                              |
| AT2G04880 | UGUGAAUAACAAGAUUGGCGU   | 111   | 4 Translation   | [ Symbols: ZAP1, ATWRKY1, WRKY1   zinc-dependent activator protein-1   chr2:1717888-1720526 FORWARD LENGTH=2028                                                                                                                                              |
| AT2G05140 | UUGGAGGCCUACUACUUGAGGA  | 679   | 1.5 Cleavage    | [ Symbols:   phosphoribosylaminoimidazole carboxylase family protein / AIR carboxylase family protein   chr2:1853935-1854903 FORWARD LENGTH=489                                                                                                              |
| AT2G05160 | UUUGAGCACUCUUGAGCCGGA   | 154   | 3.5 Cleavage    | [ Symbols:   CCH-type zinc fingerfamily protein with RNA-binding domain   chr2:1858543-1861895 REVERSE LENGTH=2436                                                                                                                                           |
| AT2G05171 | UAGGCGUAGAGAUUGGAGCGCCU | 875   | 4.5 Cleavage    | [ Symbols:   Pseudogene of AT3G18310   chr2:1874040-1874997 FORWARD LENGTH=958                                                                                                                                                                               |
| AT2G05260 | UGGAUUCGCGUGCAUACUCC    | 392   | 4.5 Cleavage    | [ Symbols:   alpha/beta-Hydrolases superfamily protein   chr2:1918289-1920042 FORWARD LENGTH=1379                                                                                                                                                            |
| AT2G05370 | UCACAUUGGAGCAGUCUGAAC   | 187   | 4.5 Cleavage    | [ Symbols:   BEST Arabidopsis thaliana protein match is: RNA-dependent RNA polymerase 6 (TAIR:AT3G49500.1); Has 65 Blast hits to 37 proteins in 13 species: Archae - 0; Bacteria - 0; Metazoa - 0; Fungi - 0; Plants - 65; Viruses - 0; Other Eukaryot       |
| AT2G05440 | UGAGAAGGACUAGAAUAGAAUC  | 103   | 3 Cleavage      | [ Symbols:   ATGRP9, GRP9   GLYCINE RICH PROTEIN 9   chr2:1993082-1994166 FORWARD LENGTH=727                                                                                                                                                                 |
| AT2G05803 | UUUGAGACACUCCUGACCGGA   | 160   | 4 Cleavage      | [ Symbols:   unknown protein; LOCATED IN: endomembrane system; Has 30201 Blast hits to 17322 proteins in 780 species: Archae - 12; Bacteria - 1396; Metazoa - 17338; Fungi - 3422; Plants - 5037; Viruses - 0; Other Eukaryotes - 2996 (source: P            |
| AT2G05900 | UUUGAUUCCACCGGAUAAACUC  | 175   | 4 Cleavage      | [ Symbols:   SDG11, SUVH10   SET domain protein 11   chr2:2256970-2257908 FORWARD LENGTH=939                                                                                                                                                                 |
| AT2G06000 | CAACUACAACGAGGGGACUUG   | 198   | 4.5 Cleavage    | [ Symbols:   Pentatricopeptide repeat (PPR) superfamily protein   chr2:2327386-2329665 REVERSE LENGTH=2083                                                                                                                                                   |
| AT2G06090 | AUUGAUUUGCACUUAAGGCGG   | 128   | 4.5 Cleavage    | [ Symbols:   Plant self-incompatibility protein S1 family   chr2:2371607-2372014 REVERSE LENGTH=408                                                                                                                                                          |
| AT2G06420 | UUUCUUCUUGGUGUGGUGCGG   | 170   | 3 Translation   | [ Symbols:   Domain of unknown function (DUF1985)   chr2:2538743-2540365 FORWARD LENGTH=1470                                                                                                                                                                 |
| AT2G06845 | UGAGCAGCUCUUGACACCGGA   | 160   | 3.5 Cleavage    | [ Symbols:   Beta-galactosidase related protein   chr2:2754666-2756008 FORWARD LENGTH=948                                                                                                                                                                    |
| AT2G06906 | UUAAGCAGGAGGAUGAUGACU   | 330   | 4.5 Cleavage    | [ Symbols:   BEST Arabidopsis thaliana protein match is: nucleic acid binding:zinc ion binding (TAIR:AT2G06904.1); Has 30201 Blast hits to 17322 proteins in 780 species: Archae - 12; Bacteria - 1396; Metazoa - 17338; Fungi - 3422; Plants - 5037; V      |
| AT2G07560 | AUACCAACAAUCUGAAUUCUUC  | 127   | 5 Cleavage      | [ Symbols:   AHAG6, HAG   H(+)-ATPase 6   chr2:3169972-3174012 REVERSE LENGTH=3332                                                                                                                                                                           |
| AT2G07716 | CUUCCCUCAAGAUUUUUUCC    | 401   | 3 Cleavage      | [ Symbols:   pseudogene, similar to orfx, blastp match of 85% identity and 5.5e-116 P-value to GP[278977 emb][CAA42649.1][ X60046 orfx [Oenothera berteriana];   chr2:3413955-3414838 FORWARD LENGTH=884                                                     |
| AT2G07799 | UAUGAGUUAUGGACGAGAGAU   | 123   | 3.5 Cleavage    | [ Symbols:   Pseudogene of ATMG0260   chr2:3466756-3467061 FORWARD LENGTH=306                                                                                                                                                                                |
| AT2G07826 | UGAGAAUAUUGCAUUCAGACU   | 158   | 5 Cleavage      | [ Symbols:   Pseudogene of ATMG01210   chr2:3361110-3361415 FORWARD LENGTH=306                                                                                                                                                                               |
| AT2G09840 | UAGGCGUGGAGGACUAGCGCA   | 299   | 4 Cleavage      | [ Symbols:   BEST Arabidopsis thaliana protein match is: nucleic acid binding:zinc ion binding (TAIR:AT2G06904.1); Has 10 Blast hits to 10 proteins in 1 species: Archae - 0; Bacteria - 0; Metazoa - 0; Fungi - 0; Plants - 10; Viruses - 0; Other Eukaryot |
| AT2G10735 | UUGACGACCAUCGCCGCUUC    | 170   | 4 Translation   | [ Symbols:   pseudogene, hypothetical protein   chr2:4224085-4226506 REVERSE LENGTH=2422                                                                                                                                                                     |
| AT2G10931 | UGAAGGAUUUGUGGUUACCA    | 474   | 4.5 Cleavage    | [ Symbols:   unknown protein; FUNCTIONS IN: molecular_function unknown; INVOLVED IN: biological_process unknown; LOCATED IN: cellular_component unknown; Has 30201 Blast hits to 17322 proteins in 780 species: Archae - 12; Bacteria - 1                    |
| AT2G10950 | UGACGGUUCAGAUUCAGGAGC   | 107   | 4 Cleavage      | [ Symbols:   BSD domain-containing protein   chr2:4315411-4317862 REVERSE LENGTH=1196                                                                                                                                                                        |
| AT2G11930 | UUUGAACUCAUGGUAACCUCA   | 227   | 4 Translation   | [ Symbols:   pseudogene, hypothetical protein, and genefinder   chr2:4809841-4812236 FORWARD LENGTH=2396                                                                                                                                                     |
| AT2G12480 | UUGAGAGCAUCCACGACUGA    | 140   | 5 Translation   | [ Symbols:   SCPL43   serine carboxypeptidase-like 43   chr2:5069590-5072533 REVERSE LENGTH=1670                                                                                                                                                             |
| AT2G13116 | UUUGAAGAUUUUGGUUAACCA   | 106   | 3 Cleavage      | [ Symbols:   pseudogene, hypothetical protein   chr2:5409925-5410530 REVERSE LENGTH=606                                                                                                                                                                      |
| AT2G13145 | UGUUUACGAGACUUGACGCCAG  | 574   | 4 Cleavage      | [ Symbols:   pseudogene, hypothetical protein   chr2:5428731-5430290 FORWARD LENGTH=1560                                                                                                                                                                     |
| AT2G13273 | UCAUAUGGUUUUGGCUACAC    | 101   | 4 Translation   | [ Symbols:   unknown protein; Has 30201 Blast hits to 17322 proteins in 780 species: Archae - 12; Bacteria - 1396; Metazoa - 17338; Fungi - 3422; Plants - 5037; Viruses - 0; Other Eukaryotes - 2996 (source: NCBI BLINK)   chr2:5498542-5498667 F          |
| AT2G13560 | UUGAGAGCACUCCAGCAGGUC   | 125   | 5 Translation   | [ Symbols:   NAD-ME1   NAD-dependent malic enzyme 1   chr2:5649564-5655320 FORWARD LENGTH=2214                                                                                                                                                               |
| AT2G13950 | UUUGAUUCCAGCGAUAACUC    | 175   | 3 Translation   | [ Symbols:   Cysteine/Histidine-rich C1 domain family protein   chr2:5857936-5859249 FORWARD LENGTH=1554                                                                                                                                                     |
| AT2G13975 | UAUUGAGAGAUUGCAAGUGGC   | 937   | 3.5 Translation | [ Symbols:     chr2:5864884-5865600 REVERSE LENGTH=635                                                                                                                                                                                                       |

|           |                         |      |     |             |                                                                                                                                                                                                                                                       |
|-----------|-------------------------|------|-----|-------------|-------------------------------------------------------------------------------------------------------------------------------------------------------------------------------------------------------------------------------------------------------|
| AT2G14095 | UUGACGACCAACUCCGCUCCU   | 170  | 4   | Cleavage    | Symbols:   unknown protein; FUNCTIONS IN: molecular_function unknown; INVOLVED IN: biological_process unknown; LOCATED IN: mitochondrion; EXPRESSED IN: 7 plant structures; EXPRESSED DURING: 4 anthesis, C globular stage, petal diff                |
| AT2G14100 | UAUCUCGAGAGCGGUGUCUGGC  | 334  | 4.5 | Cleavage    | Symbols: CYP705A13   cytochrome P450, family 705, subfamily A, polypeptide 13   chr2:5934556-5936371 REVERSE LENGTH=1734                                                                                                                              |
| AT2G14260 | UGUGGUUGAGUAGAGCAUUCG   | 111  | 4   | Cleavage    | Symbols: PIP   proline iminopeptidase   chr2:6041253-6043705 REVERSE LENGTH=1408                                                                                                                                                                      |
| AT2G14285 | UUCAGGGUGAAGAACUAGACU   | 1291 | 4   | Cleavage    | Symbols:   Small nuclear ribonucleoprotein family protein   chr2:6052332-6053994 REVERSE LENGTH=580                                                                                                                                                   |
| AT2G14580 | UGUGAGUUUUUGUGAGGUCUU   | 178  | 4   | Cleavage    | Symbols: ATPRB1, PRB1   basic pathogenesis-related protein 1   chr2:6225535-6226224 REVERSE LENGTH=690                                                                                                                                                |
| AT2G14740 | CUUUGCACUUAUGAAUUCUUUC  | 119  | 2.5 | Cleavage    | Symbols: ATVS93, VSR3, VSR2-2, BP80-2-2   vacuolar sorting receptor 3   chr2:6308895-6312589 FORWARD LENGTH=2080                                                                                                                                      |
| AT2G14800 | CGAGAGUUACGAGCGAGUUGUC  | 3198 | 4.5 | Cleavage    | Symbols:   unknown protein; BEST Arabidopsis thaliana protein match is: unknown protein (TAIR:AT3G44713.1); Has 41 Blast hits to 38 proteins in 14 species: Archae - 0; Bacteria - 0; Metazoa - 7; Fungi - 2; Plants - 16; Viruses - 0; Other Eukaryo |
| AT2G14820 | CAAGAGAGAGAGAGAGAGAGAG  | 169  | 4   | Cleavage    | Symbols: NPY2   Phototropic-responsive NPY3 family protein   chr2:6355886-6361300 FORWARD LENGTH=1905                                                                                                                                                 |
| AT2G14830 | UAGAGUUUUAUGAGUAGUUGCA  | 232  | 3.5 | Cleavage    | Symbols:   Regulator of Vps4 activity in the MVB pathway protein   chr2:6362481-6364093 FORWARD LENGTH=684                                                                                                                                            |
| AT2G15080 | UUAUCAUUGCCGGCUAGGGCA   | 461  | 4.5 | Cleavage    | Symbols: ARLP19, RLP19   receptor like protein 19   chr2:6533687-6536995 FORWARD LENGTH=3206                                                                                                                                                          |
| AT2G15220 | CGGAGGAAACUAGACGACGCC   | 103  | 4.5 | Cleavage    | Symbols:   Plant basic secretory protein (BSP) family protein   chr2:6608659-6609506 FORWARD LENGTH=848                                                                                                                                               |
| AT2G15470 | UUUUUGUUGACUUAUGAAACU   | 179  | 3.5 | Cleavage    | Symbols:   Pectin lyase-like superfamily protein   chr2:6754330-6756051 FORWARD LENGTH=1215                                                                                                                                                           |
| AT2G15490 | UUCUGGCGGACAAAGUUAAGCU  | 313  | 4.5 | Cleavage    | Symbols: UGT73B4   UDP-glycosyltransferase 73B4   chr2:6761635-6763474 FORWARD LENGTH=1004                                                                                                                                                            |
| AT2G15780 | UGACGUGCAGUUAUGACGCUGA  | 416  | 4   | Cleavage    | Symbols:   Cupredoxin superfamily protein   chr2:6873545-6874741 REVERSE LENGTH=935                                                                                                                                                                   |
| AT2G15830 | UCUGUAUGCAUAGCUUGGGAC   | 197  | 4.5 | Cleavage    | Symbols:   unknown protein; FUNCTIONS IN: molecular_function unknown; INVOLVED IN: biological_process unknown; LOCATED IN: endomembrane system; EXPRESSED IN: 16 plant structures; EXPRESSED DURING: 10 growth stages; BEST Ara                       |
| AT2G15840 | UAGAUAACAGAAACUUIUUCU   | 107  | 3.5 | Cleavage    | Symbols:   pseudogene, hypothetical protein   chr2:6897746-6900002 REVERSE LENGTH=2257                                                                                                                                                                |
| AT2G16110 | CUCACAAGUUAUAGGCGCUU    | 208  | 4   | Cleavage    | Symbols:   pseudogene, similar to putative AP endonuclease/reverse transcriptase, blast match of 34% identity and 5.9e-45 P-value to GP 21952510 gb AAM82604.1 AF525305_2 AF525305 putative AP endonuclease/reverse transcriptase                     |
| AT2G16510 | UAUGAGUUUGAUGACGAGAAU   | 123  | 3   | Cleavage    | Symbols:   ATPase, F0/F0 complex, subunit C protein   chr2:7159629-7160892 REVERSE LENGTH=954                                                                                                                                                         |
| AT2G16575 | UGACACCGAUUCUGAUAGCUU   | 823  | 4   | Translation | Symbols:   unknown protein; BEST Arabidopsis thaliana protein match is: unknown protein (TAIR:AT1G17780.2); Has 30201 Blast hits to 17322 proteins in 780 species: Archae - 12; Bacteria - 1396; Metazoa - 17338; Fungi - 3422; Plants - 5037; V      |
| AT2G16650 | UCCACGAACUAAAGAAUGUUA   | 448  | 4   | Cleavage    | Symbols: PRORP2   proteinaceous RNase P 2   chr2:7215819-7218395 REVERSE LENGTH=1871                                                                                                                                                                  |
| AT2G16810 | UCUUGCCGAAAAUUGCGGAAC   | 163  | 4   | Cleavage    | Symbols:   F-box and associated interaction domains-containing protein   chr2:7287412-7288945 REVERSE LENGTH=1534                                                                                                                                     |
| AT2G16850 | UGGCGCUACACUUGCGAGGAGU  | 1187 | 3.5 | Cleavage    | Symbols: PI3FB, PI2F.8   plasma membrane intrinsic protein 2.8   chr2:7301581-7303437 FORWARD LENGTH=1160                                                                                                                                             |
| AT2G16810 | UUUGAGUGAGAGUAGAGUUAU   | 818  | 2   | Cleavage    | Symbols: AMS   basic helix-loop-helix (bHLH) DNA-binding superfamily protein   chr2:7331721-7334254 FORWARD LENGTH=1893                                                                                                                               |
| AT2G16950 | UUUGGUGCGGCAUUGACGCGC   | 147  | 4   | Translation | Symbols: TRN1, ATTIR1   transporter 1   chr2:7353847-7361202 FORWARD LENGTH=3331                                                                                                                                                                      |
| AT2G16990 | UUUGAGAGAUCCCUUGAUUCUG  | 632  | 4.5 | Translation | Symbols:   Major facilitator superfamily protein   chr2:7383035-7387854 FORWARD LENGTH=1506                                                                                                                                                           |
| AT2G17010 | UAGCUAACAGAAACUUIUUCU   | 1828 | 3.5 | Cleavage    | Symbols:   Mechanosensitive ion channel family protein   chr2:7392850-7395970 REVERSE LENGTH=2404                                                                                                                                                     |
| AT2G17270 | UUUAAACACUUAAGUGUCUGU   | 1055 | 4   | Translation | Symbols: PHT3.3   phosphate transporter 3;3   chr2:7510100-7512387 FORWARD LENGTH=1555                                                                                                                                                                |
| AT2G17290 | UUGGGAGACUUAUGACGACAG   | 515  | 3.5 | Cleavage    | Symbols: CPK6, ATCDPK3, ATCPK6   Calcium-dependent protein kinase family protein   chr2:7516415-7519633 FORWARD LENGTH=2332                                                                                                                           |
| AT2G17550 | UUGGCCUGAGGUUGGACUACC   | 178  | 4.5 | Cleavage    | Symbols:   unknown protein; Has 264 Blast hits to 258 proteins in 65 species: Archae - 5; Bacteria - 5; Metazoa - 66; Fungi - 16; Plants - 107; Viruses - 0; Other Eukaryotes - 65 (source: NCBI BLink).   chr2:7634283-7637832 REVERSE LENGTH=317    |
| AT2G17640 | UUAGGAUUCUUGUUUAUUCU    | 141  | 3   | Cleavage    | Symbols: ATSERAT3.1, SAT-106   Trimeric LpxA-like enzymes superfamily protein   chr2:7668078-7670495 REVERSE LENGTH=1401                                                                                                                              |
| AT2G17750 | CAACGCUUUGAUACUACUAG    | 133  | 4   | Cleavage    | Symbols: NPI1   NEP-interacting protein 1   chr2:7709192-7711151 REVERSE LENGTH=1237                                                                                                                                                                  |
| AT2G17820 | UAAGAUIUUUGAUUACACCGGA  | 285  | 3.5 | Cleavage    | Symbols: ATHK1, AHK1, HK1   histidine kinase 1   chr2:7742924-7748220 REVERSE LENGTH=4040                                                                                                                                                             |
| AT2G17830 | UGAGUAGAAUUCGAUCAUAUC   | 114  | 5   | Cleavage    | Symbols:   F-box and associated interaction domains-containing protein   chr2:7754210-7755604 FORWARD LENGTH=1395                                                                                                                                     |
| AT2G17845 | UGGAUUCGGGUGCAUUAUCC    | 392  | 3   | Cleavage    | Symbols:   NAD(P)-binding Rossmann-fold superfamily protein   chr2:7758846-7759881 FORWARD LENGTH=939                                                                                                                                                 |
| AT2G17930 | UUCUGUAGACGAGGAGUUAUC   | 302  | 3.5 | Translation | Symbols:   Phosphatidylinositol 3- and 4-kinase family protein with FAT domain   chr2:7784288-7802230 REVERSE LENGTH=11744                                                                                                                            |
| AT2G17970 | UUUUGAGAGCCUUGUAGUAGU   | 118  | 2   | Cleavage    | Symbols:   2-oxoglutarate (2OG) and Fe(II)-dependent oxygenase superfamily protein   chr2:7818940-7821373 REVERSE LENGTH=1797                                                                                                                         |
| AT2G17972 | UCCACCGACUGAUGACAAUUG   | 1524 | 5   | Cleavage    | Symbols:   unknown protein; FUNCTIONS IN: molecular_function unknown; INVOLVED IN: biological_process unknown; LOCATED IN: chloroplast thylakoid membrane, chloroplast; EXPRESSED IN: 22 plant structures; EXPRESSED DURING: 14 gro                   |
| AT2G17990 | UUUGGUCUGGGCAUUCUGCGC   | 147  | 4   | Cleavage    | Symbols:   BEST Arabidopsis thaliana protein match is: knectin-related (TAIR:AT5G66250.3); Has 7578 Blast hits to 6129 proteins in 783 species: Archae - 220; Bacteria - 1045; Metazoa - 3605; Fungi - 575; Plants - 442; Viruses - 38; Other Eukary  |
| AT2G18040 | UGUGAGUUGUUGUGAGGAGUUC  | 178  | 4.5 | Cleavage    | Symbols: PIN1AT   peptidylprolyl cis/trans isomerase, NIMA-interacting 1   chr2:7842164-7843870 FORWARD LENGTH=875                                                                                                                                    |
| AT2G18140 | CAUUGAUUUAUGUUGCCUGGCU  | 190  | 4.5 | Cleavage    | Symbols:   Peroxidase superfamily protein   chr2:7887584-7888878 REVERSE LENGTH=1014                                                                                                                                                                  |
| AT2G18150 | CAUUGAUUUAUGUUGCCUGGCU  | 190  | 4.5 | Cleavage    | Symbols:   Peroxidase superfamily protein   chr2:7892133-7893658 REVERSE LENGTH=1249                                                                                                                                                                  |
| AT2G18170 | UGAAGGACAACGUCACGUCUG   | 1483 | 3.5 | Cleavage    | Symbols: ATMMPK7, MPK7   MAP kinase 7   chr2:7907804-7909923 REVERSE LENGTH=1695                                                                                                                                                                      |
| AT2G18180 | UGACGGUUCAGAUUCAGGAGC   | 107  | 4   | Cleavage    | Symbols:   Sec14p-like phosphatidylinositol transfer family protein   chr2:7911054-7913695 REVERSE LENGTH=1677                                                                                                                                        |
| AT2G18193 | UUUGGCCUGAGGUGUAGACACC  | 133  | 3.5 | Translation | Symbols:   P-loop containing nucleoside triphosphate hydrolases superfamily protein   chr2:7917505-7919277 REVERSE LENGTH=1697                                                                                                                        |
| AT2G18220 | UCAAACACUUGAUACAUCAUAG  | 143  | 2.5 | Cleavage    | Symbols:   Noc2p family   chr2:7928024-7931851 FORWARD LENGTH=2363                                                                                                                                                                                    |
| AT2G18290 | UUCUAGUUCGCGUUCUUCACAG  | 122  | 4.5 | Translation | Symbols: APC10   anaphase promoting complex 10   chr2:7948306-7950329 REVERSE LENGTH=1028                                                                                                                                                             |
| AT2G18390 | UGUGGAGUACAAGAGUUGGGCU  | 111  | 4.5 | Cleavage    | Symbols: TTNS, HAL, ARL2, ATRLC1   ADP-ribosylation factor family protein   chr2:7988165-7989525 FORWARD LENGTH=879                                                                                                                                   |
| AT2G18560 | UUAACCGUAAGCGUCUUAACAG  | 2330 | 4.5 | Translation | Symbols:   UDP-glycosyltransferase superfamily protein   chr2:8059288-8061056 FORWARD LENGTH=1769                                                                                                                                                     |
| AT2G18640 | UCAAACACUUGAUACAUCAUAG  | 143  | 4.5 | Cleavage    | Symbols: GGP54   geranylgeranyl pyrophosphate synthase 4   chr2:8083740-8084888 REVERSE LENGTH=1149                                                                                                                                                   |
| AT2G18700 | UCCUACGACCAACACUACUUG   | 106  | 4   | Translation | Symbols: ATTPS11, TPS11, ATTP5B   trehalose phosphatase/synthase 11   chr2:8109043-8112010 FORWARD LENGTH=2800                                                                                                                                        |
| AT2G18730 | UGUGACACCGAUUCUGAUUGC   | 114  | 4.5 | Cleavage    | Symbols: ATDGK3, DGK3   diacylglycerol kinase 3   chr2:8118830-8121925 FORWARD LENGTH=1849                                                                                                                                                            |
| AT2G18810 | CUUUGCACUUAUGAAUUCUUUC  | 119  | 3   | Cleavage    | Symbols:   Domain of unknown function (DUF313)   chr2:8147939-8149469 REVERSE LENGTH=705                                                                                                                                                              |
| AT2G18850 | UCACUGUAAUUCUGGGAGUUC   | 123  | 3.5 | Cleavage    | Symbols:   SET domain-containing protein   chr2:8160734-8163689 FORWARD LENGTH=1896                                                                                                                                                                   |
| AT2G18880 | UUUGAUUUGCAUACUAGGGCG   | 128  | 3.5 | Cleavage    | Symbols: VEL2   vernalization/VIN3-like   chr2:8172189-8178995 FORWARD LENGTH=2108                                                                                                                                                                    |
| AT2G18890 | UAUGCUUUCUUGAUUACUCCAC  | 344  | 3.5 | Cleavage    | Symbols:   Protein kinase superfamily protein superfamily protein   chr2:8183890-8186796 FORWARD LENGTH=1383                                                                                                                                          |
| AT2G19120 | UUUAUUGAGUCUAGGCCAGCU   | 149  | 4   | Cleavage    | Symbols:   P-loop containing nucleoside triphosphate hydrolases superfamily protein   chr2:8287036-8292498 REVERSE LENGTH=3659                                                                                                                        |
| AT2G19240 | UUGCAGAGUUGAUGAUACAAC   | 101  | 3   | Cleavage    | Symbols:   Ypt/Rab-GAP domain of gyp1p superfamily protein   chr2:8349048-8352562 REVERSE LENGTH=2523                                                                                                                                                 |
| AT2G19280 | UGCCUAGAUUUCUGUACUUGCA  | 125  | 3.5 | Cleavage    | Symbols:   Pentatricopeptide repeat (PPR) superfamily protein   chr2:8362435-8366144 FORWARD LENGTH=3381                                                                                                                                              |
| AT2G19390 | CUUGUGAGUUGUUGUGAGGUC   | 103  | 4   | Cleavage    | Symbols:   unknown protein; BEST Arabidopsis thaliana protein match is: unknown protein (TAIR:AT4G29790.1); Has 203 Blast hits to 188 proteins in 60 species: Archae - 0; Bacteria - 11; Metazoa - 24; Fungi - 34; Plants - 93; Viruses - 0; Other E  |
| AT2G19480 | UGCAGCCACACUGUCAUGACU   | 174  | 4   | Cleavage    | Symbols: NAP1.2   nucleosome assembly protein 1;2   chr2:8438393-8441384 FORWARD LENGTH=1671                                                                                                                                                          |
| AT2G19620 | UUUGAGCACUCUUGACCGCA    | 154  | 4   | Translation | Symbols: NDL3   N-MYC downregulated-like 3   chr2:8485991-8488720 REVERSE LENGTH=1253                                                                                                                                                                 |
| AT2G19720 | CUUUGCACUUAUGAAUUCUUUC  | 119  | 3   | Cleavage    | Symbols: rps15ab   ribosomal protein S15A B   chr2:8510020-8511339 REVERSE LENGTH=674                                                                                                                                                                 |
| AT2G19860 | UGAGAUUGCUAGAGGAAGAG    | 101  | 3.5 | Cleavage    | Symbols: ATHXK2, HXK2   hexokinase 2   chr2:8570750-8574000 FORWARD LENGTH=1815                                                                                                                                                                       |
| AT2G19870 | AUUCGAGAACUCCUGACCCCG   | 350  | 3.5 | Cleavage    | Symbols:   tRNA/RNA methyltransferase (SpoU) family protein   chr2:8575878-8577947 FORWARD LENGTH=2070                                                                                                                                                |
| AT2G19880 | AUGGAUUAUGAUACAUUGCGUC  | 196  | 4.5 | Cleavage    | Symbols:   Nucleotide-diphospho-sugar transferases superfamily protein   chr2:8581460-8585478 FORWARD LENGTH=2041                                                                                                                                     |
| AT2G19900 | UUCUUCAGACUGGUAUAGACU   | 265  | 3.5 | Cleavage    | Symbols: ATNADP-ME1, NADP-ME1   NADP-malic enzyme 1   chr2:8591899-8595478 REVERSE LENGTH=2028                                                                                                                                                        |
| AT2G19930 | UAGCUAACAGAAACUUIUUCU   | 1828 | 4   | Cleavage    | Symbols:   RNA-dependent RNA polymerase family protein   chr2:8607340-8612441 REVERSE LENGTH=3127                                                                                                                                                     |
| AT2G20010 | UUUCCUGGGGUACAGAAUAUUC  | 135  | 2   | Cleavage    | Symbols:   Protein of unknown function (DUF810)   chr2:8637747-8641474 REVERSE LENGTH=3278                                                                                                                                                            |
| AT2G20110 | CUUGGAGUCGAUUUGAGGAGUUC | 1059 | 3.5 | Cleavage    | Symbols:   Tesmin/TSO1-like CXK domain-containing protein   chr2:8684496-8687218 FORWARD LENGTH=2085                                                                                                                                                  |
| AT2G20180 | UUGGCGUAGAGUUGAGGAGCUU  | 272  | 5   | Cleavage    | Symbols: PIL5, PIL1   phytochrome interacting factor 3-like 5   chr2:8704024-8706082 REVERSE LENGTH=1939                                                                                                                                              |
| AT2G20190 | UUUACCGUACGCGUUAUUAUAG  | 267  | 4   | Translation | Symbols: ATCLASP, CLASP   CLUP-associated protein   chr2:8711596-8719018 REVERSE LENGTH=4791                                                                                                                                                          |
| AT2G20230 | UUUGUUAUACUUAUGGUCACCC  | 165  | 5   | Cleavage    | Symbols:   Tetraspanin family protein   chr2:8725541-8727742 FORWARD LENGTH=1388                                                                                                                                                                      |
| AT2G20330 | UUUACUUGCAGAUUGUUCUUC   | 314  | 2.5 | Translation | Symbols:   Transducin/WD40 repeat-like superfamily protein   chr2:8727687-8775614 REVERSE LENGTH=2244                                                                                                                                                 |
| AT2G20380 | CUUCCCUUAGAUUUCUUIUCCG  | 401  | 3.5 | Cleavage    | Symbols:   Galactose oxidase/kelch repeat superfamily protein   chr2:8794818-8795980 REVERSE LENGTH=1047                                                                                                                                              |
| AT2G20410 | CAACGCUUUGAUUACAUCAUAG  | 133  | 4.5 | Cleavage    | Symbols:   RNA-binding ASCH domain protein   chr2:8802344-8804373 FORWARD LENGTH=1324                                                                                                                                                                 |
| AT2G20480 | UGUUGAUCCAUGUUGGUCAGCU  | 608  | 4   | Translation | Symbols:   unknown protein; Has 19 Blast hits to 19 proteins in 14 species: Archae - 0; Bacteria - 0; Metazoa - 0; Fungi - 0; Plants - 19; Viruses - 0; Other Eukaryotes - 0 (source: NCBI BLink).   chr2:8803565-8831533 REVERSE LENGTH=379          |
| AT2G20570 | UACUGGAGGAGCUGACAGCACU  | 949  | 3.5 | Cleavage    | Symbols: GPR11, GLK1, ATGLK1   GBF's pro-rich region-interacting factor 1   chr2:8853558-8857756 FORWARD LENGTH=1625                                                                                                                                  |
| AT2G20580 | UGACACCGAUUCUGAUAGCUU   | 823  | 3.5 | Cleavage    | Symbols: PRN1A, ATPRN1A   26S proteasome regulatory subunit 52 1A   chr2:8859888-8864865 FORWARD LENGTH=3065                                                                                                                                          |
| AT2G20613 | UGAGAACGCUUCGCCAUUGCC   | 158  | 2.5 | Translation | Symbols:   DNA-binding storekeeper protein-related transcriptional regulator   chr2:8860307-8886444 REVERSE LENGTH=408                                                                                                                                |
| AT2G20670 | UACGCGACCGGUGUUGCUGGC   | 119  | 4.5 | Cleavage    | Symbols:   Protein of unknown function (DUF506)   chr2:8911860-8913534 REVERSE LENGTH=1250                                                                                                                                                            |
| AT2G20690 | AUUUCAGUGAGCAGUACUUCU   | 200  | 3.5 | Cleavage    | Symbols:   lumazine-binding family protein   chr2:8923305-8924974 FORWARD LENGTH=1206                                                                                                                                                                 |
| AT2G20790 | UGCCUAGAUUGCUUACUAGGCU  | 125  | 3.5 | Translation | Symbols:   clathrin adaptor complexes medium subunit family protein   chr2:8950526-8952691 REVERSE LENGTH=1819                                                                                                                                        |
| AT2G20830 | UGUAUGCAUUAUCUGGGAGUUC  | 149  | 4   | Translation | Symbols:   transferases;folic acid binding   chr2:8968209-8970727 REVERSE LENGTH=1195                                                                                                                                                                 |
| AT2G20840 | UCCAUGUCGAGAGACGGGAAC   | 136  | 4   | Cleavage    | Symbols:   Secretory carrier membrane protein (SCAMP) family protein   chr2:8971712-8974485 REVERSE LENGTH=1147                                                                                                                                       |
| AT2G20880 | UUUACUUGUCCGGCGUAGGCA   | 461  | 3.5 | Cleavage    | Symbols:   Integrase-type DNA-binding superfamily protein   chr2:8985973-8987263 FORWARD LENGTH=1291                                                                                                                                                  |
| AT2G21040 | UUAUCUGAGCGGUGUUGCGUCG  | 334  | 3.5 | Cleavage    | Symbols:   Calcium-dependent lipid-binding (CaLB domain) family protein   chr2:9026157-9027310 FORWARD LENGTH=786                                                                                                                                     |
| AT2G21187 | UUUAGCACUUCAGAGAGAGAGG  | 162  | 3.5 | Cleavage    | Symbols:   Potential natural antisense gene, locus overlaps with AT2G21185   chr2:9026292-9077468 FORWARD LENGTH=816                                                                                                                                  |
| AT2G21390 | UGUGUAUGCAUUAUUGGGAC    | 106  | 3.5 | Translation | Symbols:   Coatomer, alpha subunit   chr2:9152006-9156978 FORWARD LENGTH=4190                                                                                                                                                                         |
| AT2G21540 | CUUAAUCUUAUCCUUUGGACU   | 115  | 4   | Cleavage    | Symbols: SFH3   SEC14-like 3   chr2:9220764-9224374 REVERSE LENGTH=1941                                                                                                                                                                               |

|           |                         |       |     |             |                                                                                                                                                                                                                                                              |
|-----------|-------------------------|-------|-----|-------------|--------------------------------------------------------------------------------------------------------------------------------------------------------------------------------------------------------------------------------------------------------------|
| AT2G21740 | UGACGGAAAGCUACAGAGGAUG  | 108   | 4   | Cleavage    | [ Symbols:   Protein of unknown function (DUF1278)   chr2:9281986-9282363 REVERSE LENGTH=378                                                                                                                                                                 |
| AT2G21750 | UGACGGAAAGCUACAGAGGAUG  | 108   | 3   | Cleavage    | [ Symbols:   Protein of unknown function (DUF1278)   chr2:9283367-9283744 REVERSE LENGTH=378                                                                                                                                                                 |
| AT2G21895 | UGACGGAAAGCUACAGAGGAUG  | 108   | 4   | Cleavage    | [ Symbols:   Encodes a ECA1 gametogenesis related family protein [pseudogene]   chr2:9333002-9333336 REVERSE LENGTH=335                                                                                                                                      |
| AT2G21910 | UUUUUAUACACAGUGGACUGUGU | 118   | 5   | Cleavage    | [ Symbols:   CYP96A5   cytochrome P450, family 96, subfamily A, polypeptide 5   chr2:9341498-9343030 FORWARD LENGTH=1533                                                                                                                                     |
| AT2G22010 | UCUUUGCAUGAGGUAUAGCGCCU | 355   | 4   | Cleavage    | [ Symbols:   RKP1   related to KPC1   chr2:9363721-9369307 REVERSE LENGTH=4368                                                                                                                                                                               |
| AT2G22060 | UAGAGUUUAGUUGGGACAGGA   | 199   | 4   | Translation | [ Symbols:   BEST Arabidopsis thaliana protein match is: Galactose oxidase/Kelch repeat superfamily protein (TAIR:AT2G22030.1); Has 148 Blast hits to 148 proteins in 2 species: Archae - 0; Bacteria - 0; Metazoa - 0; Fungi - 0; Plants - 148; Viruses - 0 |
| AT2G22125 | UUAGACCCGAGGAGUAGUAGU   | 291   | 4.5 | Cleavage    | [ Symbols:   CS11   binding   chr2:9406263-9414518 FORWARD LENGTH=6941                                                                                                                                                                                       |
| AT2G22170 | UACACUCACUUGAUUGUAGGA   | 223   | 4   | Translation | [ Symbols:   Lipase/lipoxygenase, PLAT/LH2 family protein   chr2:9426849-9427817 REVERSE LENGTH=788                                                                                                                                                          |
| AT2G22190 | UAGAAUUUAUUGAUUGUUGGGA  | 194   | 4   | Cleavage    | [ Symbols:   TYPE1   Halaoid dehalogenase-like hydrolase (HAD) superfamily protein   chr2:9433765-9436544 REVERSE LENGTH=1259                                                                                                                                |
| AT2G22400 | UACACCCGACUGAGCAAAUGU   | 1524  | 4   | Cleavage    | [ Symbols:   [S-adenosyl-L-methionine-dependent methyltransferases superfamily protein   chr2:9504659-9508875 REVERSE LENGTH=2678                                                                                                                            |
| AT2G22500 | UAGAAUUUAUUGCUUGGCA     | 194   | 4   | Cleavage    | [ Symbols:   UCP5, ATPUMP5, DIC1   uncoupling protein 5   chr2:9563224-9564751 REVERSE LENGTH=1528                                                                                                                                                           |
| AT2G22530 | UGAGAUUGCUAGAGAAAGAG    | 101   | 3.5 | Cleavage    | [ Symbols:   [Alkaline-phosphatase-like family protein   chr2:9572796-9577441 REVERSE LENGTH=3052                                                                                                                                                            |
| AT2G22540 | CUCGGAGAAAGAGAAAGGCU    | 259   | 3.5 | Translation | [ Symbols:   SVP, AG122   K-box region and MADS-box transcription factor family protein   chr2:9579874-9583893 FORWARD LENGTH=1556                                                                                                                           |
| AT2G22650 | UAUUCUGAGAGCGGUGCUGGC   | 334   | 4   | Cleavage    | [ Symbols:   FAD-dependent oxidoreductase family protein   chr2:9624586-9626969 REVERSE LENGTH=1418                                                                                                                                                          |
| AT2G22680 | UGAGAACGCUUGCCAUUGGA    | 158   | 4   | Cleavage    | [ Symbols:   Zinc finger (C3HC4-type RING finger) family protein   chr2:9645313-9647613 FORWARD LENGTH=2301                                                                                                                                                  |
| AT2G22750 | CGAGAGAUUACGAGGACUUGA   | 3198  | 3   | Translation | [ Symbols:   basic helix-loop-helix (bHLH) DNA-binding superfamily protein   chr2:9672144-9673625 FORWARD LENGTH=920                                                                                                                                         |
| AT2G22770 | UUAGAACAGCCUGAUGAAGU    | 102   | 4.5 | Cleavage    | [ Symbols:   NAIL1   basic helix-loop-helix (bHLH) DNA-binding superfamily protein   chr2:9684725-9686595 FORWARD LENGTH=1370                                                                                                                                |
| AT2G22950 | UCGAGGCGCAAGACAUAUGACU  | 334   | 4.5 | Translation | [ Symbols:   [Cation transporter/ E1-E2 ATPase family protein   chr2:9766127-9769766 FORWARD LENGTH=3048                                                                                                                                                     |
| AT2G23110 | AUUUGGCGCUACACUCUGCAA   | 204   | 3.5 | Translation | [ Symbols:   Late embryogenesis abundant protein, group 6   chr2:9840456-9841046 FORWARD LENGTH=591                                                                                                                                                          |
| AT2G23200 | UGAGACACAAACAGGGAGAUUC  | 244   | 4   | Cleavage    | [ Symbols:   Protein kinase superfamily protein   chr2:9879276-9881908 FORWARD LENGTH=2633                                                                                                                                                                   |
| AT2G23250 | UCUAGUUCACAUUUUUGCGAC   | 427   | 4   | Cleavage    | [ Symbols:   UGT84B2   UDP-glucosyl transferase 84B2   chr2:9897809-9899125 REVERSE LENGTH=1317                                                                                                                                                              |
| AT2G23390 | UGUGGUUGUACUCUACAGUCU   | 112   | 3   | Translation | [ Symbols:   CONTAINS InterPro DOMAIN(s): Protein of unknown function DUF482 (InterPro:IPR007434), Acyl-CoA N-acyltransferase (InterPro:IPR016181); Has 2165 Blast hits to 2163 proteins in 543 species: Archae - 0; Bacteria - 1044; Metazoa - 0            |
| AT2G23450 | UGAAUUGCUUGGACUUGUUGU   | 583   | 4.5 | Cleavage    | [ Symbols:   Protein kinase superfamily protein   chr2:9988754-9991332 REVERSE LENGTH=2387                                                                                                                                                                   |
| AT2G23460 | UAGAAUACAAAGAAAGCUUUCU  | 107   | 4.5 | Cleavage    | [ Symbols:   XLG1, ATXLG1   extra-large G-protein 1   chr2:9984776-9999122 FORWARD LENGTH=3065                                                                                                                                                               |
| AT2G23520 | UGUCACCGUAGAUUUUUCUUCU  | 123   | 3.5 | Cleavage    | [ Symbols:   Pyridoxal phosphate (PLP)-dependent transferases superfamily protein   chr2:10013991-10016943 REVERSE LENGTH=2953                                                                                                                               |
| AT2G23790 | UUUGUGAAUCGUGUUGCUUGU   | 152   | 3.5 | Cleavage    | [ Symbols:   Protein of unknown function (DUF607)   chr2:10125368-10127521 REVERSE LENGTH=1401                                                                                                                                                               |
| AT2G23810 | UGUGUGUGAGUAGAGCAUAUC   | 111   | 3   | Cleavage    | [ Symbols:   TET8   tetraspanin8   chr2:10135605-10137561 REVERSE LENGTH=1285                                                                                                                                                                                |
| AT2G24020 | UCUAGUUCGCAUUUUUUGGAC   | 421   | 3.5 | Cleavage    | [ Symbols:   Uncharacterised BCR, Yba8 family COG0718   chr2:10217701-10219352 REVERSE LENGTH=800                                                                                                                                                            |
| AT2G24050 | UGAAUAAUACGAGGACCAAGCC  | 263   | 4   | Cleavage    | [ Symbols:   eIF4A62   Mf4f domain-containing protein / MA3 domain-containing protein   chr2:10225225-10228638 REVERSE LENGTH=2701                                                                                                                           |
| AT2G24100 | AUACCCAAACUGAACUUUCU    | 127   | 4.5 | Cleavage    | [ Symbols:   unknown protein; BEST Arabidopsis thaliana protein match is: unknown protein (TAIR:AT4G30780.1); Has 101 Blast hits to 101 proteins in 16 species: Archae - 0; Bacteria - 0; Metazoa - 0; Fungi - 0; Plants - 95; Viruses - 0; Other Eukar      |
| AT2G24350 | UUUUAAUUAACAGUAGUCUGACU | 133   | 3.5 | Translation | [ Symbols:   RNA binding (RRM/RBD/RNP motifs) family protein   chr2:10361126-10364492 FORWARD LENGTH=1996                                                                                                                                                    |
| AT2G24430 | UUUGAGCAGCUACACAGACAG   | 162   | 4   | Cleavage    | [ Symbols:   ANAC038, NAC038   NAC domain containing protein 38   chr2:10383517-10386625 REVERSE LENGTH=1025                                                                                                                                                 |
| AT2G24570 | UCCGUAGAAUUAUUAACAACUG  | 281   | 3   | Cleavage    | [ Symbols:   WRKY17, ATWRKY17   WRKY DNA-binding protein 17   chr2:10437398-10439298 REVERSE LENGTH=1320                                                                                                                                                     |
| AT2G24696 | CUUUGCAGCUAUGAUUUCUUCU  | 119   | 4   | Cleavage    | [ Symbols:   transcriptional factor B3 family protein   chr2:10509068-10510902 REVERSE LENGTH=1128                                                                                                                                                           |
| AT2G24730 | UUUGGCUUGGGCAUUCUUGCGC  | 147   | 3.5 | Cleavage    | [ Symbols:   60S ribosomal protein L4/L1 (RPL4), pseudogene, blastp match of 68% identity and 7.9e-28 P-value to SP Q9XF97 RL4_PRUAR 60S ribosomal protein L4 (L1). (Apricot) [Prunus armeniaca]   chr2:10526349-10527025 REVERSE LENG                       |
| AT2G24750 | UGUGAGUGUUUGUGAGUGGUUCU | 178   | 3   | Translation | [ Symbols:   pseudogene, similar to Avr9/Cf-9 rapidly elicited protein 141, similar to GB-AB861068; blastp match of 43% identity and 5.0e-152 P-value to GP 30013669 gb AAP03877.1  [AY220478 Avr9/Cf-9 rapidly elicited protein 141] [Nicotiani             |
| AT2G24800 | UUUGACGCAACUCCGCGUCCU   | 170   | 3.5 | Translation | [ Symbols:   Peroxidase superfamily protein   chr2:10571255-10572570 REVERSE LENGTH=990                                                                                                                                                                      |
| AT2G24860 | UGACUCUGUAGGUGUUGCGAG   | 45    | 4   | Cleavage    | [ Symbols:   DnaJ/Hsp40 cysteine-rich domain superfamily protein   chr2:10586775-10588329 REVERSE LENGTH=867                                                                                                                                                 |
| AT2G24940 | UACCGGAGAGCUACAAACACC   | 302   | 5   | Cleavage    | [ Symbols:   AMAPR2, MAPR2   membrane-associated progesterone binding protein 2   chr2:10609394-10612332 FORWARD LENGTH=2839                                                                                                                                 |
| AT2G24945 | UACCGGAGAGCUACAAACACC   | 378   | 5   | Cleavage    | [ Symbols:   unknown protein; BEST Arabidopsis thaliana protein match is: unknown protein (TAIR:AT4G36925.1); Has 6 Blast hits to 6 proteins in 2 species: Archae - 0; Bacteria - 0; Metazoa - 0; Fungi - 0; Plants - 6; Viruses - 0; Other Eukaryotes - 0   |
| AT2G24950 | UGAGCCGACAAAGAUUUAUUAUC | 111   | 4.5 | Cleavage    | [ Symbols:   Protein of Unknown Function (DUF239)   chr2:10613105-10615563 FORWARD LENGTH=1236                                                                                                                                                               |
| AT2G25010 | UGUAUUGAUUUAUUGGGACUUC  | 149   | 3.5 | Translation | [ Symbols:   Aminotransferase-like, plant mobile domain family protein   chr2:10631531-10633663 FORWARD LENGTH=1806                                                                                                                                          |
| AT2G25110 | UCGAGUGACUUIUGGAGGCAUUC | 244   | 3   | Translation | [ Symbols:   SDF2, ATSD, AISDF2   stromal cell-derived factor 2-like protein precursor   chr2:10684135-10686085 FORWARD LENGTH=1197                                                                                                                          |
| AT2G25290 | CAAAUCUGGACAGUACUUGCU   | 324   | 3.5 | Translation | [ Symbols:   Phox1   Octicosapeptide/Phox/Bem1p (PB1) domain-containing protein   chr2:10765717-10768665 REVERSE LENGTH=2723                                                                                                                                 |
| AT2G25320 | UGUGUGUAGUUGGCUACGCGCCU | 283   | 3.5 | Translation | [ Symbols:   TRAF-like family protein   chr2:10781851-10788065 REVERSE LENGTH=5122                                                                                                                                                                           |
| AT2G25340 | UGGGCGUACAUCUGCAAGGU    | 10625 | 4   | Cleavage    | [ Symbols:   ATVAMP712, VAMP712   vesicle-associated membrane protein 712   chr2:10792664-10793832 REVERSE LENGTH=660                                                                                                                                        |
| AT2G25490 | UAUAGGGGUUGAAAGAAAGUUG  | 252   | 3.5 | Cleavage    | [ Symbols:   EBF1, FB16   E1N3-binding F box protein 1   chr2:10847375-10850532 REVERSE LENGTH=2787                                                                                                                                                          |
| AT2G25540 | UCAAAGGCUUGGAGGAUUGUUGU | 102   | 3   | Cleavage    | [ Symbols:   CESA10   cellulose synthase 10   chr2:10866822-10872077 REVERSE LENGTH=3446                                                                                                                                                                     |
| AT2G25660 | UAGCUACAAGAAACUUCUUCU   | 1828  | 3.5 | Translation | [ Symbols:   emb2410   embryo defective 2410   chr2:10916203-10927390 REVERSE LENGTH=6754                                                                                                                                                                    |
| AT2G25730 | UGCAUUAACUUGGGACUUAUCU  | 413   | 3   | Cleavage    | [ Symbols:   unknown protein; LOCATED IN: cellular_component unknown; EXPRESSED IN: 23 plant structures; EXPRESSED DURING: 14 growth stages.   chr2:10956301-10972927 REVERSE LENGTH=8028                                                                    |
| AT2G25737 | UUUGCCUUGUUAACUCGAGUA   | 114   | 3.5 | Cleavage    | [ Symbols:   Sulfite exporter Tau/SAFE family protein   chr2:10976936-10979900 FORWARD LENGTH=1892                                                                                                                                                           |
| AT2G25800 | UAGGCGUGAGAUUGGACGCU    | 875   | 4.5 | Cleavage    | [ Symbols:   Protein of unknown function (DUF810)   chr2:11005924-11009739 REVERSE LENGTH=3189                                                                                                                                                               |
| AT2G25940 | UUUGAGGACUCCUUGACCCGA   | 160   | 4   | Cleavage    | [ Symbols:   ALPHA-VPE, ALPHAVPE   alpha-vacuolar processing enzyme   chr2:11063301-11066028 REVERSE LENGTH=1640                                                                                                                                             |
| AT2G26040 | UUUGGAGACUCCUUGACCCCG   | 350   | 3.5 | Cleavage    | [ Symbols:   PPL2, RCAR14   PPL1-like 2   chr2:11094832-11095404 REVERSE LENGTH=573                                                                                                                                                                          |
| AT2G26180 | UUUGUUAUACUUGGUGUACCC   | 165   | 3.5 | Cleavage    | [ Symbols:   IODE   Iq-domain 6   chr2:11143290-11145103 REVERSE LENGTH=1515                                                                                                                                                                                 |
| AT2G26250 | UCAUUGUUGUUCUUGUCCUUC   | 245   | 3   | Cleavage    | [ Symbols:   FDH, KCS10   3-ketoadyl-CoA synthase 10   chr2:11170418-11173142 REVERSE LENGTH=2117                                                                                                                                                            |
| AT2G26290 | UAACAAGAACUUCUUUUUUCUUC | 235   | 3.5 | Cleavage    | [ Symbols:   ARSK1   root-specific kinase 1   chr2:11192137-11194259 REVERSE LENGTH=1375                                                                                                                                                                     |
| AT2G26350 | UCCAAGUAGUCUGACUUCUUCU  | 596   | 3   | Cleavage    | [ Symbols:   PEX10, ATPFX10   peroxin 10   chr2:11217439-11220507 REVERSE LENGTH=1566                                                                                                                                                                        |
| AT2G26360 | UGUGGUAUACAAGAUUGGGCU   | 111   | 4   | Cleavage    | [ Symbols:   Mitochondrial substrate carrier family protein   chr2:11221516-11223213 REVERSE LENGTH=1304                                                                                                                                                     |
| AT2G26420 | UCUUAUGCCAAUGUACUUCUAG  | 106   | 3   | Cleavage    | [ Symbols:   PIP5K3   1-phosphatidylinositol-4-phosphate 5-kinase 3   chr2:11239434-11242239 REVERSE LENGTH=2118                                                                                                                                             |
| AT2G26455 | UUGGACACAGGUGGACUUGU    | 104   | 2   | Cleavage    | [ Symbols:   pseudogene, similar to Ubiquitin conjugating enzyme 7 interacting protein 4 (UbcM4- interacting protein 4) (RING finger protein 144). (Mouse), contains a Prosit:PS00518: Zinc finger, C3HC4 type (RING finger), signature and Pfam:P           |
| AT2G26460 | UCUGAAUCUCAAAGACCCCAAC  | 493   | 3.5 | Cleavage    | [ Symbols:   SMU2   RED family protein   chr2:11254932-11258973 REVERSE LENGTH=1935                                                                                                                                                                          |
| AT2G26560 | UUGGACUGGAGUAGGACUAGG   | 101   | 4   | Translation | [ Symbols:   PLP2, PLA IIA, PLAZA   phospholipase A 2A   chr2:11293769-11295806 REVERSE LENGTH=1465                                                                                                                                                          |
| AT2G26590 | UUUGAGAUUCCUUGUUAUUGU   | 106   | 3.5 | Cleavage    | [ Symbols:   RPN13   regulatory particle non-ATPase 13   chr2:11311004-11315096 REVERSE LENGTH=1183                                                                                                                                                          |
| AT2G26710 | CUCAGGCUCAUACUGCAGCUC   | 968   | 3.5 | Cleavage    | [ Symbols:   BAS1, CYP734A1, CYP72B1   Cytochrome P450 superfamily protein   chr2:11380492-11383612 FORWARD LENGTH=1970                                                                                                                                      |
| AT2G26730 | UCAAAGGCUUGGAGGAUUGUUGU | 102   | 4   | Cleavage    | [ Symbols:   Leucine-rich repeat protein kinase family protein   chr2:11388407-11391641 FORWARD LENGTH=2546                                                                                                                                                  |
| AT2G26790 | UAACCGGGGCAUGAGAGACUC   | 100   | 3   | Cleavage    | [ Symbols:   Pentatricopeptide repeat (PPR) superfamily protein   chr2:11425270-11427669 REVERSE LENGTH=2400                                                                                                                                                 |
| AT2G26980 | UCUGAUUGCAUGUGGUGUAC    | 109   | 3   | Translation | [ Symbols:   CPK3   CBL-interacting protein kinase 3   chr2:11514703-11518323 REVERSE LENGTH=1993                                                                                                                                                            |
| AT2G27040 | AACAAGAUUGUUGAACAGUUCU  | 111   | 3.5 | Cleavage    | [ Symbols:   AGO4   Argonaute family protein   chr2:11536534-11542357 REVERSE LENGTH=3189                                                                                                                                                                    |
| AT2G27060 | UUUGAGGACUUGACCGUACUAG  | 261   | 4   | Cleavage    | [ Symbols:   Leucine-rich repeat protein kinase family protein   chr2:11551041-11554775 FORWARD LENGTH=3508                                                                                                                                                  |
| AT2G27090 | CCGAUUCUAGUAGUAGUUGUUGU | 186   | 3   | Cleavage    | [ Symbols:   Protein of unknown function (DUF630 and DUF623)   chr2:11567436-11575855 REVERSE LENGTH=2679                                                                                                                                                    |
| AT2G27170 | UUACAUUCUUCUUCUUGGAUCU  | 119   | 3   | Cleavage    | [ Symbols:   TTN7, SMC3   Structural maintenance of chromosomes (SMC) family protein   chr2:11609122-11617434 REVERSE LENGTH=3968                                                                                                                            |
| AT2G27220 | UACAGAAUAGGCUUAAGUUAAC  | 189   | 3.5 | Translation | [ Symbols:   BLHS   BEL1-like homeodomain 5   chr2:11637164-11639537 REVERSE LENGTH=1492                                                                                                                                                                     |
| AT2G27260 | AUACUUCGCGCAACCAACUUC   | 222   | 2   | Cleavage    | [ Symbols:   Late embryogenesis abundant [LEA] hydroxyproline-rich glycoprotein family   chr2:11669655-11670644 FORWARD LENGTH=990                                                                                                                           |
| AT2G27360 | UCCCGGAUUGGUGAAGAAAGUA  | 113   | 4.5 | Cleavage    | [ Symbols:   GDSL-like Lipase/Acylhydrolase superfamily protein   chr2:11706198-11708065 FORWARD LENGTH=1380                                                                                                                                                 |
| AT2G27380 | UUUGAUUCCGAGGAUGAGGGAU  | 112   | 3.5 | Cleavage    | [ Symbols:   ATPEP1, EPR1   extensin proline-rich 1   chr2:11713411-11715696 FORWARD LENGTH=2286                                                                                                                                                             |
| AT2G27389 | UGAAUUGGCUACACUGGACC    | 197   | 4.5 | Cleavage    | [ Symbols:   unknown protein; LOCATED IN: endomembrane system.   chr2:11720294-11721081 FORWARD LENGTH=788                                                                                                                                                   |
| AT2G27395 | UUCCUUGAGAAUUCUUCUCCU   | 1646  | 3.5 | Cleavage    | [ Symbols:   pseudogene of cysteine protease-related   chr2:11721051-11721324 REVERSE LENGTH=274                                                                                                                                                             |
| AT2G27580 | UAACCGUACUGCGCUACAAG    | 192   | 5   | Cleavage    | [ Symbols:   A20/AN1-like zinc finger family protein   chr2:11776411-11777529 REVERSE LENGTH=855                                                                                                                                                             |
| AT2G27610 | UAUUCUGAGAGCGGUGCUGGC   | 334   | 4   | Cleavage    | [ Symbols:   Tetraatricopeptide repeat (TPR)-like superfamily protein   chr2:11783927-11786533 REVERSE LENGTH=2607                                                                                                                                           |
| AT2G27690 | UUACGAGCUCUAGCCCAACU    | 447   | 4.5 | Cleavage    | [ Symbols:   CYP94C1   cytochrome P450, family 94, subfamily C, polypeptide 1   chr2:11809306-11811215 FORWARD LENGTH=1910                                                                                                                                   |
| AT2G27775 | UUUUUCGAGCAUGAUGAGACU   | 107   | 4   | Cleavage    | [ Symbols:   FUNCTIONS IN: molecular_function unknown; INVOLVED IN: biological_process unknown; LOCATED IN: chloroplast; EXPRESSED IN: 22 plant structures; EXPRESSED DURING: 13 growth stages; BEST Arabidopsis thaliana protein match                      |
| AT2G27810 | UAAGACUUAUACGCGUGUCCU   | 152   | 5   | Cleavage    | [ Symbols:   ATNAT12, NAT12   nucleobase-ascorbate transporter 12   chr2:11852080-11856291 FORWARD LENGTH=2691                                                                                                                                               |
| AT2G27830 | UGACGGUUCAGAUUACGAGGC   | 107   | 3   | Cleavage    | [ Symbols:   unknown protein; BEST Arabidopsis thaliana protein match is: unknown protein (TAIR:AT4G22758.1); Has 131 Blast hits to 131 proteins in 17 species: Archae - 0; Bacteria - 0; Metazoa - 0; Fungi - 0; Plants - 131; Viruses - 0; Other Euk       |
| AT2G27960 | UUUAGGAUUGUUGCAUAUGCA   | 1164  | 4.5 | Cleavage    | [ Symbols:   CKS1, CKSIAT   cyclin-dependent kinase-subunit 1   chr2:11910723-11911685 REVERSE LENGTH=586                                                                                                                                                    |
| AT2G27970 | UACCGGAGGAGCUACAACACC   | 302   | 4.5 | Translation | [ Symbols:   CKD   CKD-subunit 2   chr2:11912212-11913297 REVERSE LENGTH=573                                                                                                                                                                                 |
| AT2G28270 | UCCGAGGAGUAGUACCGGACGAC | 270   | 4   | Translation | [ Symbols:   Cysteine/Histidine-rich C1 domain family protein   chr2:12053542-12054398 FORWARD LENGTH=857                                                                                                                                                    |
| AT2G28290 | UGGGCGCUUAUACUUGGGUUGU  | 115   | 3.5 | Cleavage    | [ Symbols:   SYD, CHR3   P-loop containing nucleoside triphosphate hydrolases superfamily protein   chr2:12056213-12073083 FORWARD LENGTH=10837                                                                                                              |
| AT2G28320 | UCGACACCAUCUGUCAUGAUUCU | 174   | 2.5 | Cleavage    | [ Symbols:   Pleckstrin homology (PH) and lipid-binding START domains-containing protein   chr2:12094746-12099644 FORWARD LENGTH=2849                                                                                                                        |

|           |                         |      |     |             |                                                                                                                                                                                                                                                       |
|-----------|-------------------------|------|-----|-------------|-------------------------------------------------------------------------------------------------------------------------------------------------------------------------------------------------------------------------------------------------------|
| AT2G28420 | UAAAACUGAACCAUGCCUAGA   | 302  | 3   | Cleavage    | Symbols:   Lactoylglutathione lyase / glyoxalase I family protein   chr2:12157923-12158791 FORWARD LENGTH=869                                                                                                                                         |
| AT2G28450 | AAAUAAAAACGAACCAUGCCU   | 203  | 4   | Cleavage    | Symbols:   zinc finger (CCCH-type) family protein   chr2:12162090-12166039 REVERSE LENGTH=2783                                                                                                                                                        |
| AT2G28460 | UUGGCAUUGCAAUUGAAGCAUCU | 131  | 4   | Cleavage    | Symbols:   Cysteine/Histidine-rich C1 domain family protein   chr2:12166573-12168874 FORWARD LENGTH=2302                                                                                                                                              |
| AT2G28620 | UUUGGGUUUGGGUUAACUGCU   | 225  | 3.5 | Cleavage    | Symbols:   P-loop containing nucleoside triphosphate hydrolases superfamily protein   chr2:12265167-12270020 REVERSE LENGTH=3129                                                                                                                      |
| AT2G28660 | UGAAGGACAAUGACAGCUGCU   | 415  | 4   | Cleavage    | Symbols:   Chloroplast-targeted copper chaperone protein   chr2:12295327-12297117 FORWARD LENGTH=1063                                                                                                                                                 |
| AT2G28810 | UCAAACACUUGAUCAUACUAG   | 143  | 5   | Translation | Symbols:   DoF-type zinc finger DNA-binding family protein   chr2:12363630-12365377 FORWARD LENGTH=1371                                                                                                                                               |
| AT2G28930 | UGGGCCCUUUAUACUUAUGGGUU | 115  | 4.5 | Cleavage    | Symbols:   APK18, PK18   protein kinase 18   chr2:12424342-12426674 FORWARD LENGTH=1557                                                                                                                                                               |
| AT2G28960 | CUACAACUUGGACGACUCCCU   | 156  | 4   | Cleavage    | Symbols:   Leucine-rich repeat protein kinase family protein   chr2:12437914-12442347 REVERSE LENGTH=2787                                                                                                                                             |
| AT2G29010 | CUACAACUUGGACGACUCCCU   | 156  | 4   | Cleavage    | Symbols:   pseudogene, receptor protein kinase, contains a protein kinase domain (PSS0011), contains a 5-locus glycoprotein family domain (PF00954); contains LRR Leucine Rich Repeat domains; blastp match of 42% identity and 3.1e-185 P-v          |
| AT2G29100 | UAUGGAGAUGAUGCGAAUGGCC  | 152  | 4.5 | Translation | Symbols:   ATGLR2.9, GLR2.9   glutamate receptor 2.9   chr2:12501092-12504912 REVERSE LENGTH=2823                                                                                                                                                     |
| AT2G29110 | UUGAGAUAUCCCGUUAUCUG    | 106  | 4   | Translation | Symbols:   ATGLR2.8, GLR2.8   glutamate receptor 2.8   chr2:12506880-12510552 REVERSE LENGTH=2844                                                                                                                                                     |
| AT2G29320 | UACCCGUUAGCGUCCUUAACAAG | 3223 | 4.5 | Cleavage    | Symbols:   NAD(P)-binding Rossmann-fold superfamily protein   chr2:12592148-12593686 FORWARD LENGTH=1151                                                                                                                                              |
| AT2G29340 | UACCCGUUAGCGUCCUUAACAAG | 3223 | 5   | Cleavage    | Symbols:   NAD-dependent epimerase/dehydratase family protein   chr2:12597115-12598423 FORWARD LENGTH=922                                                                                                                                             |
| AT2G29470 | UUCACAUGUCCGGGCUAGGCGA  | 461  | 4.5 | Cleavage    | Symbols:   ATGSTU3, GST21, GSTU3   glutathione S-transferase tau 3   chr2:12628541-12629543 REVERSE LENGTH=856                                                                                                                                        |
| AT2G29670 | CCUGAGCCUAGGACCGACGAGUA | 270  | 4   | Cleavage    | Symbols:   Tetra tricopeptide repeat (TPR)-like superfamily protein   chr2:12681958-12685087 REVERSE LENGTH=2149                                                                                                                                      |
| AT2G29940 | UGAGCCGACAAAGAGUAGUUAUC | 111  | 4.5 | Cleavage    | Symbols:   PDR3, ATPDR3   pleiotropic drug resistance 3   chr2:12760139-12766623 FORWARD LENGTH=4449                                                                                                                                                  |
| AT2G29960 | UCAAAGAACUUAUCCGCCUAGA  | 152  | 5   | Translation | Symbols:   CYP5, ATPCY5, CYP19-4   cyclophilin 5   chr2:12769033-12770579 REVERSE LENGTH=777                                                                                                                                                          |
| AT2G30040 | CGGAUUCUGAUUGCAUGUGUGU  | 186  | 4.5 | Cleavage    | Symbols:   MAPKKK14   mitogen-activated protein kinase kinase kinase 14   chr2:12821710-12823169 FORWARD LENGTH=1460                                                                                                                                  |
| AT2G30300 | UUUAAAACCGAGGACUUUUGCG  | 115  | 4.5 | Translation | Symbols:   Major facilitator superfamily protein   chr2:12919401-12921222 FORWARD LENGTH=1503                                                                                                                                                         |
| AT2G30330 | UCCUUAUCAGUUGAAGAACGCG  | 272  | 3.5 | Translation | Symbols:   BLOS1   GCN5L1 family protein   chr2:12928767-12929737 REVERSE LENGTH=786                                                                                                                                                                  |
| AT2G30505 | UCUAGUUCGGGUUCUUCAGAC   | 300  | 3   | Cleavage    | Symbols:   Late embryogenesis abundant (LEA) hydroxyproline-rich glycoprotein family   chr2:13000973-13002563 REVERSE LENGTH=1591                                                                                                                     |
| AT2G30670 | UUUGGGUUUGGGUUAACUGCU   | 225  | 3.5 | Cleavage    | Symbols:   NAD(P)-binding Rossmann-fold superfamily protein   chr2:13069313-13070904 REVERSE LENGTH=789                                                                                                                                               |
| AT2G30770 | UGUCCCAUCUUAACUUAACUCCU | 279  | 5   | Translation | Symbols:   CYP71A13   cytochrome P450, family 71, subfamily A, polypeptide 13   chr2:13108794-13112011 REVERSE LENGTH=1632                                                                                                                            |
| AT2G30790 | UGAGGACGAGCUGAAGCAGCU   | 949  | 3   | Cleavage    | Symbols:   PSBP-2   photosystem II subunit P-2   chr2:13118937-13120090 REVERSE LENGTH=901                                                                                                                                                            |
| AT2G30820 | UUGAUUGCAUUAUCUUGGGUUAU | 149  | 4.5 | Cleavage    | Symbols:   unknown protein; BEST Arabidopsis thaliana protein match is: unknown protein (TAIR:AT1G06660.1); Has 35333 Blast hits to 34131 proteins in 2444 species: Archae - 798; Bacteria - 22429; Metazoa - 974; Fungi - 991; Plants - 531; Vi      |
| AT2G31060 | UGUGAGGUUUUGUGAGGUCUU   | 178  | 3.5 | Cleavage    | Symbols:   elongation factor family protein   chr2:13213172-13218567 REVERSE LENGTH=2346                                                                                                                                                              |
| AT2G31081 | UGCAUUAUCUUGGGACUAUCCU  | 413  | 4.5 | Cleavage    | Symbols:   CLE4   CLAVATA3/ESR-RELATED 4   chr2:13238047-13238600 FORWARD LENGTH=554                                                                                                                                                                  |
| AT2G31345 | UUUAGGUAUUGUGCAUAUGGCA  | 1164 | 4   | Cleavage    | Symbols:   unknown protein; FUNCTIONS IN: molecular_function unknown; INVOLVED IN: biological_process unknown; LOCATED IN: endomembrane system; BEST Arabidopsis thaliana protein match is: unknown protein (TAIR:AT1G06135.1); H                     |
| AT2G31420 | UUCGACAGCAUAUGAAGUUAUA  | 448  | 3.5 | Translation | Symbols:   Domain of unknown function (DUF313)   chr2:13393364-13394001 REVERSE LENGTH=638                                                                                                                                                            |
| AT2G31470 | CUGGGUACAGAAACAUUGCGCU  | 197  | 3   | Translation | Symbols:   DOR   F-box and associated interaction domains-containing protein   chr2:13407492-13408655 REVERSE LENGTH=1164                                                                                                                             |
| AT2G31560 | UACACUGACCAACAACAGUGGCU | 106  | 4.5 | Translation | Symbols:   Protein of unknown function (DUF1685)   chr2:13436557-13438011 FORWARD LENGTH=1169                                                                                                                                                         |
| AT2G31570 | UUUAGUUCGGGUUCUUCACAGC  | 122  | 3.5 | Cleavage    | Symbols:   ATPGX2, GPX2   glutathione peroxidase 2   chr2:13437974-13439881 REVERSE LENGTH=853                                                                                                                                                        |
| AT2G31580 | UUCUGAGGACCAAGCAGUCAGCU | 1012 | 3.5 | Translation | Symbols:   tRNAHis guanylyltransferase   chr2:13440909-13445851 REVERSE LENGTH=1946                                                                                                                                                                   |
| AT2G31585 | UGAAUAAAAACGAAACCAUGCC  | 263  | 4   | Translation | Symbols:   other RNA   chr2:13446002-13446729 FORWARD LENGTH=728                                                                                                                                                                                      |
| AT2G31625 | CAACUAAACACGAGGCGACUG   | 198  | 3.5 | Translation | Symbols:   unknown pseudogene   chr2:13453331-13455235 REVERSE LENGTH=1001                                                                                                                                                                            |
| AT2G31660 | UGAAUGACAAACUGGACAAAGCU | 583  | 4   | Cleavage    | Symbols:   SAD2, URM9   ARM repeat superfamily protein   chr2:13464298-13471821 FORWARD LENGTH=3812                                                                                                                                                   |
| AT2G31720 | CUUUGCAUCUUGAAGAUUUUUC  | 119  | 3   | Cleavage    | Symbols:   Domain of unknown function (DUF313)   chr2:13485034-13485975 REVERSE LENGTH=942                                                                                                                                                            |
| AT2G31750 | UUGAAAGACUUGUGGUAACACC  | 926  | 3.5 | Translation | Symbols:   UGT74D1   UDP-glucosyl transferase 74D1   chr2:13497233-13500023 FORWARD LENGTH=1603                                                                                                                                                       |
| AT2G31810 | CUCAACAGUUAUUAUGAGCUU   | 208  | 4   | Translation | Symbols:   ACT domain-containing small subunit of acetolactate synthase protein   chr2:13524222-13528501 FORWARD LENGTH=1718                                                                                                                          |
| AT2G31840 | UUCUUCUUGAGUUAUGAGGACU  | 265  | 3   | Cleavage    | Symbols:   Thiorodanin superfamily protein   chr2:13537912-13539758 REVERSE LENGTH=1184                                                                                                                                                               |
| AT2G31860 | UGGAGAUGAUAUGAUUAGCGCU  | 109  | 4.5 | Translation | Symbols:   pseudogene, poly (ADP-ribose) glycohydrolase, putative, contains Pfam domain, PF05028: poly (ADP-ribose) glycohydrolase (PARG); blastp match of 59% identity and 1.4e-19 P-value to EGAD   134505   143482 114E2.c protein [Droso          |
| AT2G31890 | UUUUGAUCGAGGAUGAUGGAU   | 816  | 2.5 | Cleavage    | Symbols:   ATRAP, RAP   RAP   chr2:13556500-13559767 REVERSE LENGTH=2668                                                                                                                                                                              |
| AT2G31970 | CUAGAUAUUCUUAUCCUUAUCCU | 235  | 4   | Cleavage    | Symbols:   RAD50, ATRAD50   DNA repair-recombination protein (RAD50)   chr2:13600491-13609069 FORWARD LENGTH=4371                                                                                                                                     |
| AT2G32450 | UCUGUAUGCAUAUACUGGGAC   | 1212 | 4   | Cleavage    | Symbols:   Calcium-binding tetra tricopeptide family protein   chr2:13778449-13781258 FORWARD LENGTH=2810                                                                                                                                             |
| AT2G32740 | UCGAGCACCUCAGCUCACUGCG  | 100  | 3.5 | Translation | Symbols:   ATGT13, GT13   galactosyltransferase 13   chr2:13868626-13888232 FORWARD LENGTH=1407                                                                                                                                                       |
| AT2G32770 | ACUGAGCGCUGAUGAUGAACGG  | 153  | 4.5 | Translation | Symbols:   PAP13, ATPAP13   purple acid phosphatase 13   chr2:13895838-13898203 FORWARD LENGTH=2104                                                                                                                                                   |
| AT2G32840 | AUGACGAUUGUUUUGACAGCCU  | 113  | 4.5 | Cleavage    | Symbols:   proline-rich family protein   chr2:13932904-13934949 REVERSE LENGTH=1324                                                                                                                                                                   |
| AT2G32930 | CGGAUUCUGAUUGCAUGUGUGU  | 186  | 4.5 | Translation | Symbols:   ZFN2   zinc finger nuclease 2   chr2:13965990-13968957 REVERSE LENGTH=1900                                                                                                                                                                 |
| AT2G32950 | UUUUAAUUCAAUGUAGUCGACU  | 133  | 4   | Cleavage    | Symbols:   COP1, ATCOP1, DET340, FUS1, EMB168   Transducin/WD40 repeat-like superfamily protein   chr2:13977933-13983535 FORWARD LENGTH=2348                                                                                                          |
| AT2G33000 | UCUUGCACUGAGGAUGAGCCGCU | 355  | 4   | Cleavage    | Symbols:   ubiquitin-associated (UBA)/TS-N domain-containing protein-related   chr2:14006135-14008535 FORWARD LENGTH=1800                                                                                                                             |
| AT2G33060 | UUGAAUUAUUGCAUGUUCUUGCG | 138  | 3.5 | Cleavage    | Symbols:   ATLRLP27, RL27   receptor like protein 27   chr2:14025483-14028196 FORWARD LENGTH=2714                                                                                                                                                     |
| AT2G33170 | UUGAGCCUGAGAUGAGCAGCCG  | 196  | 4   | Cleavage    | Symbols:   Leucine-rich repeat receptor-like protein kinase family protein   chr2:14056250-14060641 REVERSE LENGTH=4012                                                                                                                               |
| AT2G33205 | UACGUACUGCGGAUUAUCUGGGA | 271  | 4.5 | Cleavage    | Symbols:   Serine-domain containing serine and sphingolipid biosynthesis protein   chr2:14070987-14073211 REVERSE LENGTH=1269                                                                                                                         |
| AT2G33210 | UCUAGUACAUUAUUAUUGCGAC  | 427  | 4   | Cleavage    | Symbols:   HSP60-2   chaperonin family class 2   chr2:14074907-14078731 REVERSE LENGTH=2107                                                                                                                                                           |
| AT2G33255 | UACGCAUUGGAGCUCUUGACACC | 187  | 3.5 | Translation | Symbols:   Halophilobacterium-like hydrolase (HAD) superfamily protein   chr2:14098778-14100593 FORWARD LENGTH=990                                                                                                                                    |
| AT2G33320 | UUUGAUCCGAGGAUGAUGGAU   | 816  | 3   | Cleavage    | Symbols:   Calcium-dependent lipid-binding (CaLB domain) family protein   chr2:14119526-14122094 REVERSE LENGTH=2569                                                                                                                                  |
| AT2G33350 | UUGAAAGACUUGUGGUAUACCC  | 926  | 2   | Translation | Symbols:   CCT motif family protein   chr2:14133929-14137154 FORWARD LENGTH=1735                                                                                                                                                                      |
| AT2G33509 | UUCGACAGCAUAUGAUGUUAUA  | 448  | 4.5 | Cleavage    | Symbols:   unknown protein; Has 30201 Blast hits to 17322 proteins in 780 species: Archae - 12; Bacteria - 1396; Metazoa - 17338; Fungi - 3422; Plants - 5037; Viruses - 0; Other Eukaryotes - 2996 (source: NCBI BLink).   chr2:14193890-1419411     |
| AT2G33560 | AAACAGGACAAUUGAUGUCCGCG | 986  | 5   | Cleavage    | Symbols:   BUBR1   BUB1-related; budding uninhibited by benzimidazole 1   chr2:14213601-14215999 REVERSE LENGTH=1478                                                                                                                                  |
| AT2G33620 | UCGAGUACACAGAAUGGGCGUC  | 179  | 4   | Cleavage    | Symbols:   AT hook motif DNA-binding family protein   chr2:14234026-14236862 FORWARD LENGTH=1389                                                                                                                                                      |
| AT2G33680 | CUACAACUUGAGACACUCCUCC  | 156  | 4   | Cleavage    | Symbols:   Tetra tricopeptide repeat (TPR)-like superfamily protein   chr2:14249608-14251791 FORWARD LENGTH=2184                                                                                                                                      |
| AT2G33740 | UGAGAUGUCUAGAGGAAGAAG   | 101  | 3.5 | Cleavage    | Symbols:   CUTA   Nitrogen regulatory Pil-like, alpha/beta   chr2:14269581-14271674 FORWARD LENGTH=828                                                                                                                                                |
| AT2G33760 | UUUUGCUUAGACUUAAGAAACU  | 179  | 3   | Cleavage    | Symbols:   Pentatricopeptide repeat (PPR) superfamily protein   chr2:14275800-14277551 FORWARD LENGTH=1752                                                                                                                                            |
| AT2G33790 | AUGACGAUUGUUUUGACAGCCU  | 113  | 4.5 | Translation | Symbols:   ATGAP30, AGP30   arabinogalactan protein 30   chr2:14293561-14295271 REVERSE LENGTH=1055                                                                                                                                                   |
| AT2G33847 | UCUGGGUAUGAUGGGAUUUAUAU | 123  | 4.5 | Cleavage    | Symbols:   unknown protein; LOCATED IN: chloroplast; BEST Arabidopsis thaliana protein match is: unknown protein (TAIR:AT1G28395.3); Has 71 Blast hits to 71 proteins in 10 species: Archae - 0; Bacteria - 0; Metazoa - 0; Fungi - 0; Plants - 71;   |
| AT2G34260 | UUUGGCUUGAGGUGGACAGCCG  | 367  | 4.5 | Cleavage    | Symbols:   transducin family protein / WD-40 repeat family protein   chr2:14465876-14468531 FORWARD LENGTH=1281                                                                                                                                       |
| AT2G34310 | UUUGAAAGACUUGUGGUAUACCC | 926  | 3.5 | Translation | Symbols:   unknown protein; FUNCTIONS IN: molecular_function unknown; INVOLVED IN: biological_process unknown; LOCATED IN: cellular_component unknown; EXPRESSED IN: 24 plant structures; EXPRESSED DURING: 13 growth stages; BE                      |
| AT2G34410 | UCAGCGGACAGGAUAGUUGGCU  | 1505 | 3.5 | Cleavage    | Symbols:   O-acetyltransferase family protein   chr2:14518406-14522622 FORWARD LENGTH=2391                                                                                                                                                            |
| AT2G34450 | UCUGGGAGAAAGAGAGAGGCG   | 259  | 3   | Cleavage    | Symbols:   HMG-coA (high mobility group) DNA-binding family protein   chr2:14527736-14529492 REVERSE LENGTH=685                                                                                                                                       |
| AT2G34470 | CAUUGAGUACUUGAGCCUUGGCU | 190  | 4.5 | Cleavage    | Symbols:   UREG, FSK109   urase accessory protein G   chr2:14530735-14532505 REVERSE LENGTH=1087                                                                                                                                                      |
| AT2G34555 | UUGGCAUUGAGCAUUAUUGUUC  | 119  | 3.5 | Translation | Symbols:   ATGA20X3, GA20X3   gibberellin 2-oxidase 3   chr2:14556888-14558697 FORWARD LENGTH=1137                                                                                                                                                    |
| AT2G34630 | AUGACGAUUGUUUUGACAGCCG  | 113  | 4   | Cleavage    | Symbols:   GPPS, GPPS1   geranyl diphosphate synthase 1   chr2:14578630-14581727 FORWARD LENGTH=1426                                                                                                                                                  |
| AT2G34680 | UCCCAACCCAGAUCAUUAAGCG  | 236  | 3.5 | Translation | Symbols:   AIR9   Outer arm dynein light chain 1 protein   chr2:14616622-14629129 REVERSE LENGTH=5739                                                                                                                                                 |
| AT2G34770 | UCAUUGCAGUAUAGUCCUGGA   | 104  | 5   | Cleavage    | Symbols:   FAH1, ATFAH1   fatty acid hydroxylase 1   chr2:14665667-14668250 FORWARD LENGTH=1142                                                                                                                                                       |
| AT2G34780 | UAACAAGAACUUCUUCUUAUUCU | 235  | 3.5 | Translation | Symbols:   EMB1611, MEE22   maternal effect embryo arrest 22   chr2:14668653-14673904 FORWARD LENGTH=4191                                                                                                                                             |
| AT2G34990 | UUUUGAACUUAUGAUAACCCU   | 768  | 3   | Cleavage    | Symbols:   RING/U-box superfamily protein   chr2:14750260-14751168 REVERSE LENGTH=909                                                                                                                                                                 |
| AT2G35020 | UAAGGAGAGCAGCAGUUAUGGA  | 134  | 4   | Cleavage    | Symbols:   GlnAC1pUT2   N-acetylglucosamine-1-phosphate uridylyltransferase 2   chr2:14756711-14760706 FORWARD LENGTH=1830                                                                                                                            |
| AT2G35075 | UUUUGAACUUAUGAUAACCCU   | 768  | 3.5 | Cleavage    | Symbols:   unknown protein; Has 30201 Blast hits to 17322 proteins in 780 species: Archae - 12; Bacteria - 1396; Metazoa - 17338; Fungi - 3422; Plants - 5037; Viruses - 0; Other Eukaryotes - 2996 (source: NCBI BLink).   chr2:14786682-1478902     |
| AT2G35200 | UCUUAUGCAUUAUGUUAUUCUAC | 106  | 4   | Cleavage    | Symbols:   unknown protein; BEST Arabidopsis thaliana protein match is: unknown protein (TAIR:AT1G32690.1); Has 36 Blast hits to 36 proteins in 8 species: Archae - 0; Bacteria - 0; Metazoa - 0; Fungi - 0; Plants - 36; Viruses - 0; Other Eukaryot |
| AT2G35390 | UGCCAUGUACGAGAGCUGCCG   | 164  | 4   | Cleavage    | Symbols:   Phosphoribosyltransferase family protein   chr2:14895279-14897822 REVERSE LENGTH=1070                                                                                                                                                      |
| AT2G35450 | UUUGUUAACUUAUGGUCACCC   | 138  | 3   | Translation | Symbols:   catalytic; hydrolases   chr2:14903045-14905372 REVERSE LENGTH=1208                                                                                                                                                                         |
| AT2G35620 | UCCAACCGAUGAUGCAUUAUG   | 1524 | 5   | Cleavage    | Symbols:   FEI2   Leucine-rich repeat protein kinase family protein   chr2:14961113-14965497 REVERSE LENGTH=2205                                                                                                                                      |
| AT2G35630 | UUUGAUUGCAUGUGGUGUUAAC  | 110  | 3.5 | Cleavage    | Symbols:   MOR1, GEM1   ARM repeat superfamily protein   chr2:14966678-14980606 FORWARD LENGTH=6332                                                                                                                                                   |
| AT2G35637 | UACUGGAGGACGCUAAGCACCU  | 949  | 4   | Translation | Symbols:   other RNA   chr2:14982608-14983998 REVERSE LENGTH=1149                                                                                                                                                                                     |
| AT2G35720 | UCUGGGUAUGGAGGAUUAUUAU  | 123  | 4   | Cleavage    | Symbols:   DWL1   DNAJ heat shock N-terminal domain-containing protein   chr2:15016670-15020011 FORWARD LENGTH=1975                                                                                                                                   |
| AT2G36109 | UUCGAGCUCUUGAUGAUJAG    | 109  | 3   | Translation | Symbols:   Uncharacterised protein family (UPF0497)   chr2:15159591-15160750 REVERSE LENGTH=855                                                                                                                                                       |
| AT2G36145 | UUUGGCUUGAGUUGAGCGCG    | 367  | 4   | Cleavage    | Symbols:   unknown protein; FUNCTIONS IN: molecular_function unknown; INVOLVED IN: biological_process unknown; LOCATED IN: chloroplast thylakoid membrane, chloroplast stroma, chloroplast; EXPRESSED IN: 19 plant structures; EXPRES                 |
| AT2G36190 | GCAAGUGAUGAUAAAAGACA    | 100  | 3   | Cleavage    | Symbols:   ActwN4V, cwnV4   cell wall invertase 4   chr2:15174730-15177870 REVERSE LENGTH=2082                                                                                                                                                        |
| AT2G36240 | UCGACACACUCUGAUGAUCU    | 174  | 3   | Cleavage    | Symbols:   pentatricopeptide (PPR) repeat-containing protein   chr2:15195653-15197264 FORWARD LENGTH=1612                                                                                                                                             |

|           |                         |      |                 |                                                                                                                                                                                                                                                          |
|-----------|-------------------------|------|-----------------|----------------------------------------------------------------------------------------------------------------------------------------------------------------------------------------------------------------------------------------------------------|
| AT2G36307 | UACCGGAGGACGUACAACACC   | 302  | 5 Translation   | [ Symbols: ZPR4   ZPR4 (LITTLE ZIPPER 4); other RNA   chr2:15218040-15219415 REVERSE LENGTH=706                                                                                                                                                          |
| AT2G36340 | UUUUGGUUAGACUUAAGAAAC   | 179  | 3 Cleavage      | [ Symbols:   DNA-binding storekeeper protein-related transcriptional regulator   chr2:15235723-15237728 FORWARD LENGTH=1619                                                                                                                              |
| AT2G36350 | UUCGAGCUUUCUGAACCAAC    | 156  | 4 Cleavage      | [ Symbols:   Protein kinase superfamily protein   chr2:15238093-15241923 FORWARD LENGTH=3142                                                                                                                                                             |
| AT2G36370 | UUUGAGCACUCUUGACCCGA    | 154  | 3.5 Translation | [ Symbols:   ubiquitin-protein ligases   chr2:15247793-15252967 FORWARD LENGTH=2965                                                                                                                                                                      |
| AT2G36480 | UGUGGAUACAAGAGCUGGGU    | 215  | 4 Cleavage      | [ Symbols:   ENTH/VHS family protein   chr2:15302804-15306274 REVERSE LENGTH=2803                                                                                                                                                                        |
| AT2G36680 | UUUGGCUUGAGGUUGGACGCC   | 367  | 4 Cleavage      | [ Symbols:   Modifier of rudimentary (ModR) protein   chr2:15368806-15370825 REVERSE LENGTH=1016                                                                                                                                                         |
| AT2G36850 | UACCGGAGGACGUACAAGUC    | 401  | 4.5 Cleavage    | [ Symbols: ATGSL08, GSL8, GSL08, ATGSL8, CHOR   glucan synthase-like 8   chr2:15454697-15469889 REVERSE LENGTH=6176                                                                                                                                      |
| AT2G37030 | UUUGUGAAUCGUUAGUUGUA    | 152  | 3.5 Cleavage    | [ Symbols:   SAUR-like auxin-responsive protein family   chr2:15553732-15554106 FORWARD LENGTH=375                                                                                                                                                       |
| AT2G37050 | UUCGAGAACUCCUGACCCGA    | 1272 | 4.5 Translation | [ Symbols:   Leucine-rich repeat protein kinase family protein   chr2:15568986-15573736 FORWARD LENGTH=3355                                                                                                                                              |
| AT2G37070 | UUCUGGAGGACGUACAGCACU   | 949  | 4 Cleavage      | [ Symbols:   unknown protein; BEST Arabidopsis thaliana protein match is: unknown protein (TAIR:AT3G53320.1); Has 1323 Blast hits to 775 proteins in 176 species: Archae - 0; Bacteria - 113; Metazoa - 351; Fungi - 175; Plants - 115; Viruses - 13;    |
| AT2G37230 | UAUUCUUGUCUUGUACGACCU   | 295  | 3 Cleavage      | [ Symbols:   Tetratricopeptide repeat (TPR)-like superfamily protein   chr2:15637046-15639522 REVERSE LENGTH=2477                                                                                                                                        |
| AT2G37362 | UUUGGCGUCCAACUCGCAAGG   | 4868 | 4 Translation   | [ Symbols:   Potential natural antisense gene, locus overlaps with AT2G37360   chr2:15673687-15675978 FORWARD LENGTH=2292                                                                                                                                |
| AT2G37430 | CGAUUUCUGAUUGCAGUUGGU   | 186  | 4.5 Cleavage    | [ Symbols:   C2H2 and C2HC zinc fingers superfamily protein   chr2:15706357-15707224 FORWARD LENGTH=868                                                                                                                                                  |
| AT2G37440 | UUUAAACCGAGGACUUUUGC    | 115  | 3 Cleavage      | [ Symbols:   DNase I-like superfamily protein   chr2:15719788-15722108 FORWARD LENGTH=1777                                                                                                                                                               |
| AT2G37520 | UUUGAUCCGAGGAGUAGGGAU   | 716  | 3.5 Cleavage    | [ Symbols:   Acyl-CoA N-acyltransferase with RING/FYVE/PHD-type zinc finger domain   chr2:15744769-15750107 REVERSE LENGTH=3246                                                                                                                          |
| AT2G37670 | UUGAGAGUAUUAUUGACGGUC   | 831  | 3 Translation   | [ Symbols:   Transducin/WD40 repeat-like superfamily protein   chr2:15797384-15800536 REVERSE LENGTH=2712                                                                                                                                                |
| AT2G37690 | UUGGACGCCUCUACUAGAGA    | 679  | 1.5 Cleavage    | [ Symbols:   phosphoribosylaminoimidazole carboxylase, putative / AIR carboxylase, putative   chr2:15805715-15810552 FORWARD LENGTH=2406                                                                                                                 |
| AT2G37860 | UUCCCCUAGAAUUCUUUCCUC   | 1646 | 3.5 Cleavage    | [ Symbols:   LCD1   Protein of unknown function (DUF3411)   chr2:15856632-15858920 FORWARD LENGTH=1531                                                                                                                                                   |
| AT2G37930 | UGACACCGAUUCUGAUAGUCU   | 823  | 2.5 Cleavage    | [ Symbols:   Protein of unknown function (DUF3527)   chr2:15873117-15874972 FORWARD LENGTH=1773                                                                                                                                                          |
| AT2G37970 | UUAGCGUAGGUUGGACGCCU    | 231  | 4.5 Cleavage    | [ Symbols:   SOUL-1   SOUL heme-binding family protein   chr2:15890972-15891843 FORWARD LENGTH=872                                                                                                                                                       |
| AT2G38020 | UAGAUAACAAGAACUUCUUCU   | 107  | 2.5 Cleavage    | [ Symbols:   VCL1, MAN, EMB258   vacuoleless1 (VCL1)   chr2:15909908-15914710 REVERSE LENGTH=2875                                                                                                                                                        |
| AT2G38025 | UCUGUAUGCAUUGCGUGGGAC   | 197  | 4.5 Cleavage    | [ Symbols:   Cysteine proteinases superfamily protein   chr2:15914958-15916733 REVERSE LENGTH=1027                                                                                                                                                       |
| AT2G38070 | AUCACUCCGGAAUACAUAUUC   | 222  | 1.5 Cleavage    | [ Symbols:   Protein of unknown function (DUF740)   chr2:15928591-15930794 FORWARD LENGTH=2204                                                                                                                                                           |
| AT2G38080 | UUUGGACACGAGUACUAGGUA   | 106  | 3.5 Cleavage    | [ Symbols:   RX12, LACA, ATLMMCA, LMCO4   Laccase/phenol oxidase family protein   chr2:15934460-15937616 FORWARD LENGTH=2021                                                                                                                             |
| AT2G38120 | CACUAUACAACGAGGCGACUG   | 198  | 5 Translation   | [ Symbols:   AUX1, WAV5, PIR1, MAP1   Transmembrane amino acid transporter family protein   chr2:15972993-15977180 FORWARD LENGTH=2135                                                                                                                   |
| AT2G38195 | UGAAGGACAGUCACGCUUGU    | 1483 | 4 Cleavage      | [ Symbols:   RING/U-box superfamily protein   chr2:16003615-16006654 FORWARD LENGTH=1712                                                                                                                                                                 |
| AT2G38260 | CUUGGCAUGCAUUAUUGAUUC   | 1059 | 3.5 Cleavage    | [ Symbols:   pseudogene, similar to carboxyl transferase alpha subunit, similar to GB-U34392, however, a substitution at base 93910 in our sequence causes a stop codon in the coding region. We sequenced four clones in that region which all cc       |
| AT2G38365 | AUGGAUUUAGUAUACUUGCCUC  | 156  | 4.5 Cleavage    | [ Symbols:   unknown protein; Has 7 Blast hits to 7 proteins in 2 species: Archae - 0; Bacteria - 0; Metazoa - 0; Fungi - 0; Plants - 7; Viruses - 0; Other Eukaryotes - 0 (source: NCBI BLink).   chr2:16070881-16072007 FORWARD LENGTH=1127            |
| AT2G38420 | UACGCCCAUUCUGAAGAUUU    | 194  | 4 Cleavage      | [ Symbols:   Pentatricopeptide repeat (PPR) superfamily protein   chr2:16091093-16092549 REVERSE LENGTH=1457                                                                                                                                             |
| AT2G38440 | UACCGUUGGCGCCUACAAG     | 192  | 4.5 Cleavage    | [ Symbols:   FTB1, SCAR2, DIS3, WAVE4, ATSCAR2   SCAR homolog 2   chr2:16095329-16101221 FORWARD LENGTH=4791                                                                                                                                             |
| AT2G38450 | AUGGAUUUAGUAUACUUGCCUC  | 196  | 3.5 Translation | [ Symbols:   CONTAINS InterPro DOMAIN(s): Sell-like (InterPro:IPR006597); BEST Arabidopsis thaliana protein match is: unknown protein (TAIR:AT5G05360.1); Has 88 Blast hits to 88 proteins in 25 species: Archae - 0; Bacteria - 16; Metazoa - 0; Fi     |
| AT2G38460 | UAGAUAUUAUUGCUUUGGCA    | 194  | 4 Cleavage      | [ Symbols:   ATIREG1, IREG1, FPN1   Iron regulated 1   chr2:16103311-16106177 FORWARD LENGTH=1877                                                                                                                                                        |
| AT2G38570 | UACCGGAGGACGUACAUGGUA   | 401  | 5 Cleavage      | [ Symbols:   CONTAINS InterPro DOMAIN(s): PRC-barrel-like (InterPro:IPR011033); Has 300 Blast hits to 300 proteins in 81 species: Archae - 0; Bacteria - 135; Metazoa - 0; Fungi - 0; Plants - 37; Viruses - 0; Other Eukaryotes - 128 (source: NCBI BLR |
| AT2G38620 | UGUGUGUUGACUUCUACGUCU   | 106  | 4 Cleavage      | [ Symbols:   CDKB1; 2   cyclin-dependent kinase B1;2   chr2:16152532-16154086 FORWARD LENGTH=1175                                                                                                                                                        |
| AT2G38630 | CUUGGAGGAGUAUGACGCCGC   | 513  | 4 Translation   | [ Symbols:   Transducin/WD40 repeat-like superfamily protein   chr2:16154067-16156579 REVERSE LENGTH=1897                                                                                                                                                |
| AT2G38650 | UCUAGUUCGCGUUUUCAGAC    | 163  | 3.5 Translation | [ Symbols:   GAUT7, LGT7   galacturonosyltransferase 7   chr2:16161808-16165775 REVERSE LENGTH=2160                                                                                                                                                      |
| AT2G38840 | UAGAGUUAAGUUGGACGAGGA   | 199  | 5 Cleavage      | [ Symbols:   Guanylate-binding family protein   chr2:16227051-16232456 FORWARD LENGTH=2428                                                                                                                                                               |
| AT2G38910 | UUUAGAGAUCCCCUGUUAUCU   | 387  | 3.5 Cleavage    | [ Symbols:   CPK20   calcium-dependent protein kinase 20   chr2:16245214-16247483 REVERSE LENGTH=1752                                                                                                                                                    |
| AT2G38970 | UCUAGUUCACUUAUUCGCGAC   | 427  | 1.5 Translation | [ Symbols:   Zinc finger (CHC4-type RING finger) family protein   chr2:16273901-16276872 REVERSE LENGTH=2534                                                                                                                                             |
| AT2G38980 | UACAGAUAAGGCUUAGUACUAC  | 189  | 3.5 Cleavage    | [ Symbols:   pseudogene, similar to fiber protein Fb12, blast match of 53% identity and 1.2e-13 P-value to GPI Z5992543 [gb] AAN77151.1    AF531371 fiber protein Fb12 [Gossypium barbadense]   chr2:16277009-16279354 REVERSE LENGTH=2                  |
| AT2G39100 | UACGCGAUUGGAGGAUUUGUU   | 102  | 4 Cleavage      | [ Symbols:   RING/U-box superfamily protein   chr2:16317438-16319387 FORWARD LENGTH=1326                                                                                                                                                                 |
| AT2G39120 | UCGAGGCUUUAUUCUUGGGUU   | 115  | 4.5 Cleavage    | [ Symbols:   Ubiquitin carboxyl-terminal hydrolase family protein   chr2:16321794-16322957 FORWARD LENGTH=1164                                                                                                                                           |
| AT2G39220 | UCACCAUUGGCGAGCUCUGUACC | 187  | 4.5 Cleavage    | [ Symbols:   PLP6, PLA IIB   PATATIN-like protein 6   chr2:16374896-16377020 REVERSE LENGTH=2016                                                                                                                                                         |
| AT2G39280 | UUUUGUUGUAGUAUAGAAUUC   | 179  | 3.5 Cleavage    | [ Symbols:   Ypt/Rab-GAP domain of gyp1p superfamily protein   chr2:16401587-16406650 REVERSE LENGTH=2512                                                                                                                                                |
| AT2G39300 | UGACGGAAGCUCACGAGGAAGU  | 108  | 3.5 Translation | [ Symbols:   unknown protein; INVOLVED IN: biological_process unknown; LOCATED IN: vacuole; EXPRESSED IN: 8 plant structures; EXPRESSED DURING: 4 anthesis, petal differentiation and expansion stage; BEST Arabidopsis thaliana protein mat             |
| AT2G39470 | UUUUUUCCUUGUGUGCGCCGC   | 205  | 4 Cleavage      | [ Symbols:   PPL2   PsbP-like protein 2   chr2:16476216-16477843 FORWARD LENGTH=1000                                                                                                                                                                     |
| AT2G39480 | AUCCAAGUAGCUGACUUCUUGC  | 1104 | 4 Cleavage      | [ Symbols:   PGPG   P-glycoprotein 6   chr2:16477792-16485039 REVERSE LENGTH=4893                                                                                                                                                                        |
| AT2G39550 | UUUGAGCACUCUUGACGCCGA   | 154  | 4.5 Cleavage    | [ Symbols:   ATGET1-B, GGB, PGGT-1   Prenyltransferase family protein   chr2:16501623-16504304 FORWARD LENGTH=1331                                                                                                                                       |
| AT2G39580 | UUUAGAUUCCUUGUUAUUGACU  | 387  | 3.5 Cleavage    | [ Symbols:   CONTAINS InterPro DOMAIN(s): Putative zinc-finger domain (InterPro:IPR019607); Has 249 Blast hits to 219 proteins in 85 species: Archae - 0; Bacteria - 144; Metazoa - 29; Fungi - 8; Plants - 50; Viruses - 0; Other Eukaryotes - 18 (sour |
| AT2G39670 | UUAGCAGACUUGACGCCACGA   | 3733 | 3.5 Cleavage    | [ Symbols:   Radical SAM superfamily protein   chr2:16534230-16537318 FORWARD LENGTH=1692                                                                                                                                                                |
| AT2G39880 | UUAGACCCGAGGAGUAGAGACU  | 330  | 3.5 Translation | [ Symbols:   MYB25, ATMYB25   myb domain protein 25   chr2:16647945-16649479 REVERSE LENGTH=1104                                                                                                                                                         |
| AT2G39950 | UUUCUACAGUUGGAGUAGGACU  | 265  | 3 Cleavage      | [ Symbols:   unknown protein; FUNCTIONS IN: molecular_function unknown; INVOLVED IN: biological_process unknown; LOCATED IN: cellular_component unknown; EXPRESSED IN: 24 plant structures; EXPRESSED DURING: 15 growth stages; Has                      |
| AT2G40070 | UUACGAGACUUGACGCCCAACU  | 447  | 5 Cleavage      | [ Symbols:   FUNCTIONS IN: molecular_function unknown; INVOLVED IN: biological_process unknown; LOCATED IN: cellular_component unknown; EXPRESSED IN: 17 plant structures; EXPRESSED DURING: 7 growth stages; BEST Arabidopsis thalia                    |
| AT2G40190 | UUUUGUUGGACGAGUAUUAAGU  | 480  | 4 Cleavage      | [ Symbols:   LEW3   UDP-Glycosyltransferase superfamily protein   chr2:16785194-16787530 FORWARD LENGTH=1703                                                                                                                                             |
| AT2G40490 | UUUUUUGGAGUAGUAGUACUUC  | 107  | 3.5 Translation | [ Symbols:   HEM42   Uroporphyrogen decarboxylase   chr2:16912845-16915177 FORWARD LENGTH=1490                                                                                                                                                           |
| AT2G40500 | CUUGCAGGAGAUUAGACGCCGC  | 513  | 4.5 Cleavage    | [ Symbols:   Protein kinase superfamily protein   chr2:16916330-16917217 FORWARD LENGTH=888                                                                                                                                                              |
| AT2G40540 | UGUCACCGUUAUUAUUCUUCU   | 123  | 3.5 Cleavage    | [ Symbols:   K12, ATK12, SHY3, KUP2, ATKUP2, TRK2   potassium transporter 2   chr2:16931351-16934570 FORWARD LENGTH=2533                                                                                                                                 |
| AT2G40570 | UUUAUGAGACUUAAGCCAGCU   | 149  | 5 Cleavage      | [ Symbols:   Initiator tRNA phosphoribosyl transferase family protein   chr2:16940835-16943492 FORWARD LENGTH=1999                                                                                                                                       |
| AT2G40630 | UGAAGACAAUCCUGGACAGGCU  | 583  | 3 Cleavage      | [ Symbols:   Uncharacterised conserved protein (UCP030365)   chr2:16958146-16961144 FORWARD LENGTH=2106                                                                                                                                                  |
| AT2G40710 | UUACGAGACUUGACGCCAGCU   | 3733 | 4 Translation   | [ Symbols:   Haemolysin-III related integral membrane protein   chr2:16980943-16981368 REVERSE LENGTH=426                                                                                                                                                |
| AT2G40802 | UAGUGACCGAUCUUGAACACC   | 461  | 4.5 Translation | [ Symbols:   unknown protein; Has 30201 Blast hits to 17322 proteins in 780 species: Archae - 12; Bacteria - 1396; Metazoa - 17338; Fungi - 3422; Plants - 5037; Viruses - 0; Other Eukaryotes - 2996 (source: NCBI BLink).   chr2:17028304-1702840      |
| AT2G40995 | UACGCUAGGAGAGAUUUCUGCC  | 122  | 4 Cleavage      | [ Symbols:   Molecular chaperone Hsp40/DnaJ family protein   chr2:17109394-17109712 FORWARD LENGTH=246                                                                                                                                                   |
| AT2G41060 | AAACAGGACCAUUGAUUCGCGC  | 986  | 4 Cleavage      | [ Symbols:   RNA-binding (RRM/RBD/RNP motifs) family protein   chr2:17126989-17129563 FORWARD LENGTH=1787                                                                                                                                                |
| AT2G41080 | UUCGGACUGGAUAGGACUAGG   | 101  | 4 Cleavage      | [ Symbols:   Tetratricopeptide repeat (TPR)-like superfamily protein   chr2:17132853-17134593 FORWARD LENGTH=1741                                                                                                                                        |
| AT2G41190 | UAGAGUAUUGUUGGACGAGGA   | 199  | 3.5 Cleavage    | [ Symbols:   Transmembrane amino acid transporter family protein   chr2:17167279-17170407 REVERSE LENGTH=2155                                                                                                                                            |
| AT2G41200 | UUUCUGACGACGAGAAUAGGU   | 480  | 4 Cleavage      | [ Symbols:   unknown protein; Has 26 Blast hits to 26 proteins in 11 species: Archae - 0; Bacteria - 0; Metazoa - 0; Fungi - 0; Plants - 26; Viruses - 0; Other Eukaryotes - 0 (source: NCBI BLink).   chr2:17171625-17173131 FORWARD LENGTH=720         |
| AT2G41300 | UCGAGGCGAGGAGAAUUAUUC   | 334  | 3.5 Cleavage    | [ Symbols:   SS1   stricostidine synthase-like 1   chr2:17214237-17216292 REVERSE LENGTH=1260                                                                                                                                                            |
| AT2G41380 | UUUGUUAUUGUUUGGAGGUUCU  | 141  | 3 Cleavage      | [ Symbols:   S-adenosyl-L-methionine-dependent methyltransferases superfamily protein   chr2:17251941-17253057 FORWARD LENGTH=1021                                                                                                                       |
| AT2G41480 | UUUGUUAUUCUAGUGUACACC   | 165  | 3.5 Cleavage    | [ Symbols:   Peroxidase superfamily protein   chr2:17296812-17298731 REVERSE LENGTH=1202                                                                                                                                                                 |
| AT2G41630 | UUAGACACCAUCCUCCUGCCU   | 170  | 3 Cleavage      | [ Symbols:   TFIIH   transcription factor IIB   chr2:17355331-17357598 REVERSE LENGTH=1361                                                                                                                                                               |
| AT2G41700 | UUUUGUUGACGAGGUAUUCUUC  | 310  | 4 Cleavage      | [ Symbols:   ABCA1, A2ABCA1   ATP-binding cassette A1   chr2:17383042-17396110 REVERSE LENGTH=5846                                                                                                                                                       |
| AT2G41940 | UUUUAACCAACUUCUUGGCC    | 302  | 3.5 Translation | [ Symbols:   ZFP8   zinc finger protein 8   chr2:17507509-17508616 FORWARD LENGTH=1108                                                                                                                                                                   |
| AT2G41960 | UGUCCCAACUUAUCUUAACUCU  | 279  | 4.5 Cleavage    | [ Symbols:   unknown protein; BEST Arabidopsis thaliana protein match is: unknown protein (TAIR:AT3G58050.1); Has 11991 Blast hits to 7260 proteins in 458 species: Archae - 17; Bacteria - 481; Metazoa - 5028; Fungi - 1325; Plants - 615; Viruse      |
| AT2G41980 | UUGAGAUUCCUUGUUAUUCU    | 106  | 4 Translation   | [ Symbols:   Protein with RING/U-box and TRAF-like domains   chr2:17523494-17525914 REVERSE LENGTH=1335                                                                                                                                                  |
| AT2G42080 | UGGCGCUAACUUCUGCAGGAGU  | 1187 | 4.5 Translation | [ Symbols:   Chaperone DnaJ-domain superfamily protein   chr2:17553240-17555504 REVERSE LENGTH=990                                                                                                                                                       |
| AT2G42200 | UUUGAGAGCACUCCAGCCGACU  | 156  | 4.5 Cleavage    | [ Symbols:   SPL9, ATSP19   squamosa promoter binding protein-like 9   chr2:17587407-17589630 FORWARD LENGTH=1501                                                                                                                                        |
| AT2G42300 | UUUGGUUCUGAGUCCCCGCCU   | 669  | 3 Cleavage      | [ Symbols:   basic helix-loop-helix (bHLH) DNA-binding superfamily protein   chr2:17621157-17624838 FORWARD LENGTH=1576                                                                                                                                  |
| AT2G42320 | UCGACCCACUUGUUAAGGAUUC  | 121  | 4 Translation   | [ Symbols:   nucleolar protein gar2-related   chr2:17627962-17630797 FORWARD LENGTH=2290                                                                                                                                                                 |
| AT2G42388 | UUUCUGACGGACAGGAUAAGU   | 480  | 4 Cleavage      | [ Symbols:   other RNA   chr2:17650225-17651083 FORWARD LENGTH=631                                                                                                                                                                                       |
| AT2G42400 | UUCGAGGAGAUUAUGACGCCGC  | 4887 | 3.5 Cleavage    | [ Symbols:   VOZZ, ATVOZZ   vascular plant one zinc finger protein 2   chr2:17654232-17656839 REVERSE LENGTH=1834                                                                                                                                        |
| AT2G42520 | UCGAGCACUACUACUACUGCG   | 100  | 4.5 Translation | [ Symbols:   P-loop containing nucleoside triphosphate hydrolases superfamily protein   chr2:17704832-17708947 FORWARD LENGTH=2252                                                                                                                       |
| AT2G42570 | UACGCUACUGGAGAAUUCUGGGA | 271  | 4 Translation   | [ Symbols:   TBL39   TRICHOME BIREFRINGENCE-LIKE 39   chr2:17717367-17720080 REVERSE LENGTH=1394                                                                                                                                                         |
| AT2G42620 | UGAGUAGAUUCUGAUCAUAUC   | 114  | 4.5 Cleavage    | [ Symbols:   MAX2, ORE9, PPS   RNI-like superfamily protein   chr2:17756140-17758468 FORWARD LENGTH=2329                                                                                                                                                 |
| AT2G42670 | UCAUGUAGUUCUAGUUGCCUC   | 245  | 4.5 Cleavage    | [ Symbols:   Protein of unknown function (DUF1637)   chr2:17771776-17774647 REVERSE LENGTH=1431                                                                                                                                                          |
| AT2G42720 | UGACGGACAGGAUAGUUGCUUC  | 239  | 4 Cleavage      | [ Symbols:   FBD, F-box, Skp2-like and Leucine Rich Repeat domains containing protein   chr2:17785409-17787421 FORWARD LENGTH=1786                                                                                                                       |
| AT2G42800 | UUCGGAGAAAGAGAGAGGCU    | 259  | 3 Cleavage      | [ Symbols:   AIRP29, RUP29   receptor like protein 29   chr2:17807942-17809590 REVERSE LENGTH=1649                                                                                                                                                       |
| AT2G42890 | UUAAGGAGUUGACUUAUUGGA   | 134  | 3.5 Cleavage    | [ Symbols:   AM12, ML2   ML2-like 2   chr2:17850531-17854520 FORWARD LENGTH=2921                                                                                                                                                                         |
| AT2G42920 | UUUUGUUGUAGACUUAAGAAUC  | 179  | 3.5 Cleavage    | [ Symbols:   Pentatricopeptide repeat (PPR)-like superfamily protein   chr2:17858698-17863466 FORWARD LENGTH=4026                                                                                                                                        |
| AT2G43040 | UUAAGGAGAGUACGUACUUGGA  | 304  | 3.5 Translation | [ Symbols:   NPG1   tetratricopeptide repeat (TPR)-containing protein   chr2:17895883-17899374 REVERSE LENGTH=2582                                                                                                                                       |

|           |                         |      |     |             |                                                                                                                                                                                                                                                         |
|-----------|-------------------------|------|-----|-------------|---------------------------------------------------------------------------------------------------------------------------------------------------------------------------------------------------------------------------------------------------------|
| AT2G43070 | UGUGGUUACCUUCACGUCU     | 112  | 4.5 | Cleavage    | [ Symbols: SPPL3, ATPSP1 ] SIGNAL PEPTIDE PEPTIDASE-LIKE 3   chr2:17910888-17914870 REVERSE LENGTH=2062                                                                                                                                                 |
| AT2G43390 | UUUGGGUUUGGGUUAUUCUCU   | 225  | 3   | Cleavage    | [ Symbols:   unknown protein; Has 7 Blast hits to 7 proteins in 3 species: Archae - 0; Bacteria - 0; Metazoa - 0; Fungi - 0; Plants - 7; Viruses - 0; Other Eukaryotes - 0 (source: NCBI BLink). ]   chr2:18020350-18020861 REVERSE LENGTH=512          |
| AT2G43400 | CUUUGCAUCUAGAUAUUCUCU   | 119  | 4   | Cleavage    | [ Symbols: EFTQO ] electron-transfer flavoprotein:ubiquinone oxidoreductase   chr2:18021180-18025292 FORWARD LENGTH=2277                                                                                                                                |
| AT2G43420 | UCUGUAUGCAUAGCUGGGACU   | 466  | 5   | Cleavage    | [ Symbols:   3-beta hydroxysteroid dehydrogenase/isomerase family protein   chr2:18031268-18035098 REVERSE LENGTH=2073                                                                                                                                  |
| AT2G43580 | UGGAUUCGGGCGCAUACUCC    | 392  | 4.5 | Cleavage    | [ Symbols: G ] Chitinase family protein   chr2:18078649-18080028 REVERSE LENGTH=981                                                                                                                                                                     |
| AT2G43820 | CUCAUGUAUGUCUAGUUCGCA   | 102  | 4   | Cleavage    | [ Symbols: GT, UGT74F2, ATSGAT1, SGT1, SAGT1 ] UDP-glucosyltransferase 74F2   chr2:18152227-18153908 FORWARD LENGTH=1595                                                                                                                                |
| AT2G43830 | UACAGAUAAGGCUUAAGUAAAC  | 189  | 3.5 | Cleavage    | [ Symbols: pseudogene, NPK1-related protein kinase 3, identical to NPK1-related protein kinase 3 (G1:2342427) (Arabidopsis thaliana);; blastp match of 91% identity and 2.1e-09 P-value to GP 456309 dbj BAA05648.1  [D26601 protein kinase ]           |
| AT2G43960 | UUUGGUAUGGCUUAAGUAAAG   | 109  | 2.5 | Cleavage    | [ Symbols: SWAP (Suppressor-of-White-Fluor) /surp domain-containing protein   chr2:18203312-18204912 REVERSE LENGTH=1481                                                                                                                                |
| AT2G44140 | UCAUGUAGUUCUAGUUCGCCU   | 245  | 4   | Cleavage    | [ Symbols:   Peptidase family C54 protein   chr2:18251497-18257239 REVERSE LENGTH=2911                                                                                                                                                                  |
| AT2G44280 | UAGUACCGAGAGUACCAACC    | 461  | 5   | Cleavage    | [ Symbols:   Major facilitator superfamily protein   chr2:18301350-18304201 REVERSE LENGTH=1791                                                                                                                                                         |
| AT2G44410 | UUUUGAUCGGGAGAUAGGGAU   | 816  | 3.5 | Translation | [ Symbols:   RING/U-box superfamily protein   chr2:18328417-18330336 FORWARD LENGTH=1774                                                                                                                                                                |
| AT2G44470 | AUUGAGCGUCGAGUAUGAGCCU  | 2734 | 4   | Cleavage    | [ Symbols: BGLU29 ] beta glucosidase 29   chr2:18354186-18357481 FORWARD LENGTH=1605                                                                                                                                                                    |
| AT2G44760 | UUUAAAAACGAGGACUUUUGC   | 115  | 3   | Translation | [ Symbols:   Domain of unknown function (DUF3598)   chr2:18452851-18454809 REVERSE LENGTH=1613                                                                                                                                                          |
| AT2G44780 | UGACGCCAAUUCUGAAAGUUU   | 154  | 4   | Cleavage    | [ Symbols:   Encodes a Uclacyanin/Basic blue family protein [pseudogene]   chr2:18460687-18461194 REVERSE LENGTH=508                                                                                                                                    |
| AT2G44790 | UGACGCCAAUUCUGAAAGUUU   | 154  | 3.5 | Cleavage    | [ Symbols: UCC2 ] uclacyanin 2   chr2:18461906-18463309 REVERSE LENGTH=962                                                                                                                                                                              |
| AT2G44810 | UCACUGUAUUCUCUGGAGUU    | 123  | 4.5 | Cleavage    | [ Symbols: DAD1 ] alpha/beta-Hydrolases superfamily protein   chr2:18479053-18480197 FORWARD LENGTH=1145                                                                                                                                                |
| AT2G44910 | UCGGCUCAAACCUAACCGUU    | 129  | 4   | Cleavage    | [ Symbols: ATHB4, ATHB-4, HB4 ] homeobox-leucine zipper protein 4   chr2:18517887-18519525 REVERSE LENGTH=957                                                                                                                                           |
| AT2G44990 | UUGAAGAUAACUAGACGGU     | 731  | 2.5 | Cleavage    | [ Symbols: CDD7, MAX3, ATCCD7 ] carotenoid cleavage dioxygenase 7   chr2:18558938-18561621 FORWARD LENGTH=1890                                                                                                                                          |
| AT2G45030 | UUGGAGUCGGAUAGACUAGG    | 101  | 4   | Translation | [ Symbols:   Translation elongation factor EFG/EF2 protein   chr2:18572411-18576970 FORWARD LENGTH=2479                                                                                                                                                 |
| AT2G45070 | UGAGAAUUGAUUCUACAGACU   | 158  | 4   | Cleavage    | [ Symbols: SECF61 BETA ] Preprotein translocase Sec, Sec61-beta subunit protein   chr2:18587082-18588259 REVERSE LENGTH=458                                                                                                                             |
| AT2G45126 | UCUGUACCGGUAUUCUUCUCC   | 275  | 5   | Translation | [ Symbols:   unknown protein; Has 30201 Blast hits to 17322 proteins in 780 species: Archae - 12; Bacteria - 1396; Metazoa - 17338; Fungi - 3422; Plants - 5037; Viruses - 0; Other Eukaryotes - 2996 (source: NCBI BLink). ]   chr2:18605871-1860596   |
| AT2G45340 | UUGGAUUUAGUACACUUGCGGCU | 196  | 3.5 | Translation | [ Symbols:   Leucine-rich repeat protein kinase family protein   chr2:18691722-18694725 FORWARD LENGTH=2352                                                                                                                                             |
| AT2G45360 | UUGGAGUCUACUUAUAGAA     | 437  | 4   | Cleavage    | [ Symbols:   Protein of unknown function (DUF1442)   chr2:18698592-18699514 FORWARD LENGTH=829                                                                                                                                                          |
| AT2G45600 | UUGAUUCGGGCGUACUACUCC   | 392  | 3   | Cleavage    | [ Symbols:   alpha/beta-Hydrolases superfamily protein   chr2:18789588-18790952 FORWARD LENGTH=1365                                                                                                                                                     |
| AT2G45620 | UCAAACUCUGGAUACUAGUAG   | 143  | 5   | Cleavage    | [ Symbols:   Nucleotidyltransferase family protein   chr2:18792864-18795904 FORWARD LENGTH=2528                                                                                                                                                         |
| AT2G45640 | UCUAGUCCGAAAUAUGCGAAC   | 163  | 5   | Cleavage    | [ Symbols: SAP18, ATSP48 ] SIN3 associated polypeptide P18   chr2:18799610-18801383 REVERSE LENGTH=790                                                                                                                                                  |
| AT2G45840 | AUACCCAAACUAGAAUUCUUCU  | 127  | 3.5 | Translation | [ Symbols:   Arabidopsis thaliana protein of unknown function (DUF821)   chr2:18869261-18871561 FORWARD LENGTH=1671                                                                                                                                     |
| AT2G45970 | CCACGCAUCAGUAGCAACGUC   | 112  | 5   | Cleavage    | [ Symbols: CYP86A8, LCR ] cytochrome P450, family 86, subfamily A, polypeptide 8   chr2:18912260-18914739 REVERSE LENGTH=2480                                                                                                                           |
| AT2G46020 | UGUGGAUAACAGAGUUGGGCU   | 121  | 3.5 | Translation | [ Symbols: CHR2, ATBRM, BRM, CHA2 ] transcription regulatory protein SNF2, putative   chr2:18923304-18931934 FORWARD LENGTH=6747                                                                                                                        |
| AT2G46040 | UGUUGACGAGCUCUACGCCAG   | 574  | 5   | Cleavage    | [ Symbols:   ARID1/BRIGHT DNA-binding domain;ELM2 domain protein   chr2:18935301-18938447 REVERSE LENGTH=2228                                                                                                                                           |
| AT2G46110 | AUCCAAGUGAGUCUACUUCU    | 1104 | 4   | Cleavage    | [ Symbols: PANB1, PHMT1 ] ketopantoate hydroxymethyltransferase 1   chr2:18954570-18956530 REVERSE LENGTH=1400                                                                                                                                          |
| AT2G46330 | UGACGUCGAGUAUAGCGCUGA   | 416  | 4.5 | Cleavage    | [ Symbols: AGP16, ATAGP16 ] arabinogalactan protein 16   chr2:19018508-19019255 REVERSE LENGTH=748                                                                                                                                                      |
| AT2G46470 | UAUUCUCUGUCUUAUGAACGUC  | 295  | 4   | Cleavage    | [ Symbols: OXA1L ] inner membrane protein OXA1-like   chr2:19072313-19075123 FORWARD LENGTH=1618                                                                                                                                                        |
| AT2G46500 | CCACGCAUCGAUAGCAACGUC   | 122  | 5   | Cleavage    | [ Symbols: ATP4AK GAMMA 4, UBDK GAMMA 4, PI4K GAMMA 4 ] phosphoinositide 4-kinase gamma 4   chr2:19086561-19088964 REVERSE LENGTH=2311                                                                                                                  |
| AT2G46570 | UAGAGUUAAGUUGGGACAGGA   | 199  | 4   | Cleavage    | [ Symbols: LAC6 ] lacase 6   chr2:19126872-19129069 FORWARD LENGTH=1710                                                                                                                                                                                 |
| AT2G46590 | GCAAGUGAUGAUAUAAAAGUCA  | 100  | 3.5 | Translation | [ Symbols: DAD2 ] Dof-type zinc finger DNA-binding family protein   chr2:19133229-19135289 FORWARD LENGTH=2061                                                                                                                                          |
| AT2G47020 | UUUGCUGAACAUAGCAUCCU    | 119  | 3.5 | Cleavage    | [ Symbols:   Peptide chain release factor 1   chr2:19319812-19322391 REVERSE LENGTH=1631                                                                                                                                                                |
| AT2G47115 | UUUCUGUAGCAGAGGUUUAUCU  | 302  | 2.5 | Cleavage    | [ Symbols:   unknown protein; FUNCTIONS IN: molecular_function unknown; INVOLVED IN: biological_process unknown; LOCATED IN: endomembrane system; BEST Arabidopsis thaliana protein match is: unknown protein (TAIR:AT1G10660.1); H                     |
| AT2G47170 | UGCAGACACUAGUAGUAGUAG   | 174  | 3.5 | Translation | [ Symbols: ARF1A1C ] Ras-related small GTP-binding family protein   chr2:19366623-19368840 FORWARD LENGTH=1036                                                                                                                                          |
| AT2G47500 | UGAAUUCUGUACUACUGGACC   | 197  | 3.5 | Cleavage    | [ Symbols:   P-loop nucleoside triphosphate hydrolases superfamily protein with GH (Calponin Homology) domain   chr2:19492995-19498160 FORWARD LENGTH=3482                                                                                              |
| AT2G47600 | UUUGAGGAGUAUAGUACGCCGC  | 4887 | 4   | Cleavage    | [ Symbols: ATMHX, MHX1, ATMHX1, MHX ] magnesium/proton exchanger 1   chr2:19524160-19527413 REVERSE LENGTH=2147                                                                                                                                         |
| AT2G47630 | UUUUAUUCACACAGUGGACUGUG | 118  | 4   | Cleavage    | [ Symbols:   alpha/beta-Hydrolases superfamily protein   chr2:19534503-19537014 FORWARD LENGTH=1293                                                                                                                                                     |
| AT2G47770 | UUGAUUCUAGACUUGCGCGGUC  | 131  | 4   | Cleavage    | [ Symbols: ATTSPO, TSPO ] TSP0(outer membrane tryptophan-rich sensory protein)-related   chr2:19568464-19569507 FORWARD LENGTH=1044                                                                                                                     |
| AT2G47800 | UCUUGGCAUUGGAGUAUUGAACU | 154  | 4   | Cleavage    | [ Symbols: ATMP50A, EST3, MRP4, ABCC4 ] multidrug resistance-associated protein 4   chr2:19574864-19580599 FORWARD LENGTH=4847                                                                                                                          |
| AT2G48060 | UGAGAGCAUCCACCCGACUGA   | 230  | 4.5 | Cleavage    | [ Symbols:   unknown protein; FUNCTIONS IN: molecular_function unknown; INVOLVED IN: biological_process unknown; LOCATED IN: endomembrane system; EXPRESSED IN: shoot, sperm cell; CONTAINS InterPro DOMAIN/s: Protein of unknown                       |
| AT2G48070 | UCAAGCAUUGGAGAGUAUUGUU  | 102  | 3   | Cleavage    | [ Symbols: RPH1 ] resistance to phytophthora 1   chr2:19662844-19664465 FORWARD LENGTH=949                                                                                                                                                              |
| AT3G01160 | UGACACCGAUUCUGAUUGCAU   | 377  | 5   | Cleavage    | [ Symbols:   FUNCTIONS IN: molecular_function unknown; INVOLVED IN: biological_process unknown; LOCATED IN: cytosol, nucleus; EXPRESSED IN: 22 plant structures; EXPRESSED DURING: 13 growth stages; CONTAINS InterPro DOMAIN/s: NUC                    |
| AT3G01175 | UUGAACACGCCUGAUAUGAAGU  | 102  | 4   | Translation | [ Symbols:   Protein of unknown function (DUF1666)   chr3:59471-60845 FORWARD LENGTH=1219                                                                                                                                                               |
| AT3G01311 | UCCAUGUCGAAGACGCGGAAC   | 136  | 4   | Cleavage    | [ Symbols:   Protein of unknown function (DUF569)   chr3:103043-104287 REVERSE LENGTH=879                                                                                                                                                               |
| AT3G01350 | UUUGCCUGUUGAACUCGAGUA   | 114  | 3   | Cleavage    | [ Symbols:   Major facilitator superfamily protein   chr3:135024-137460 FORWARD LENGTH=1692                                                                                                                                                             |
| AT3G01380 | UUGAAGGAUUGUGGUUAACCA   | 106  | 4.5 | Translation | [ Symbols:   transferases;sulfuric ester hydrolases;catalytic;transferases   chr3:144288-149828 REVERSE LENGTH=2982                                                                                                                                     |
| AT3G01390 | UUGCAGAGUAGGAUUGCAACAC  | 101  | 3   | Cleavage    | [ Symbols: VMA10, AVMA10 ] vacuolar membrane ATPase 10   chr3:149999-151539 REVERSE LENGTH=680                                                                                                                                                          |
| AT3G01580 | UUUGCUUAGACUAGAAGAAUCU  | 179  | 3.5 | Cleavage    | [ Symbols:   Tetraatricopeptide repeat (TPR)-like superfamily protein   chr3:223529-225511 REVERSE LENGTH=1983                                                                                                                                          |
| AT3G02010 | UUUGGUAUGGCGGAUAAACUC   | 125  | 4.5 | Cleavage    | [ Symbols: FUNCTIONS IN: molecular_function unknown; INVOLVED IN: biological_process unknown; LOCATED IN: plasma membrane; EXPRESSED IN: 21 plant structures; EXPRESSED DURING: 13 growth stages; BEST Arabidopsis thaliana protein                     |
| AT3G02060 | UGCGUAUUGUCUACUUCGGA    | 103  | 4.5 | Cleavage    | [ Symbols: DEAD/DEAH box helicase, putative   chr3:254412-358833 FORWARD LENGTH=2888                                                                                                                                                                    |
| AT3G02070 | UGUCUUAACCGGACUGUCGUU   | 150  | 4.5 | Cleavage    | [ Symbols:   Cysteine proteinases superfamily protein   chr3:360921-363429 FORWARD LENGTH=1142                                                                                                                                                          |
| AT3G02230 | UGAGAAGAGUAUAGAAUAGAAUC | 103  | 2.5 | Cleavage    | [ Symbols: RGP1, ATGP1 ] reversibly glycosylated polypeptide 1   chr3:415393-417547 FORWARD LENGTH=1387                                                                                                                                                 |
| AT3G02320 | AUGGAUUUAGAUACAUUGCCGUC | 196  | 4.5 | Cleavage    | [ Symbols:   N2,N2-dimethylguanosine tRNA methyltransferase   chr3:469934-473717 FORWARD LENGTH=2158                                                                                                                                                    |
| AT3G02360 | UCGAGACCAUCUACUACUGGC   | 100  | 4   | Translation | [ Symbols:   6-phosphogluconate dehydrogenase family protein   chr3:482028-484147 FORWARD LENGTH=1929                                                                                                                                                   |
| AT3G02370 | CAUCAAGAACCCGUCUACGUCU  | 125  | 3.5 | Cleavage    | [ Symbols:   unknown protein; BEST Arabidopsis thaliana protein match is: unknown protein (TAIR:AT3G57360.1); Has 95 Blast hits to 95 proteins in 40 species: Archae - 0; Bacteria - 0; Metazoa - 53; Fungi - 2; Plants - 39; Viruses - 0; Other Eukary |
| AT3G02468 | UUGAGAUAUUCUGUAUUGCCU   | 141  | 4.5 | Translation | [ Symbols: CPODF9 ] conserved peptide upstream open reading frame 9   chr3:509087-511557 FORWARD LENGTH=1876                                                                                                                                            |
| AT3G02470 | UUGAGAUAUUCUGUAUUGCCU   | 141  | 4.5 | Translation | [ Symbols: SAMDC ] S-adenosylmethionine decarboxylase   chr3:509096-511489 FORWARD LENGTH=1799                                                                                                                                                          |
| AT3G02490 | UACGCUAGGGAGAUUACUUGCC  | 122  | 5   | Cleavage    | [ Symbols:   Pentatricopeptide repeat (PPR) superfamily protein   chr3:513525-515925 FORWARD LENGTH=2401                                                                                                                                                |
| AT3G02493 | UACGUCACUGGAAUUCUGGGA   | 271  | 4   | Translation | [ Symbols: RTFL19, DVL2 ] ROTUNDIFOLIA like 19   chr3:515944-516358 REVERSE LENGTH=415                                                                                                                                                                  |
| AT3G02560 | UGACGGAAGUCACAGAGGAUG   | 108  | 4   | Cleavage    | [ Symbols:   Ribosomal protein S7e family protein   chr3:541800-543385 FORWARD LENGTH=911                                                                                                                                                               |
| AT3G02620 | UUUGAUUCACCGGAUAAACUC   | 175  | 4.5 | Cleavage    | [ Symbols:   Plant stearyl-acyl-carrier-protein desaturase family protein   chr3:560256-561880 FORWARD LENGTH=1332                                                                                                                                      |
| AT3G02720 | UGCAUACUUGGGACUUAACUCU  | 413  | 4   | Translation | [ Symbols:   Class I glutamine amidotransferase-like superfamily protein   chr3:586224-588365 FORWARD LENGTH=1556                                                                                                                                       |
| AT3G02730 | UGUGAGAUUUUGUGAGGUCGU   | 178  | 3.5 | Translation | [ Symbols: TRXF1, ATP1 ] thioredoxin F-type 1   chr3:588408-589685 REVERSE LENGTH=793                                                                                                                                                                   |
| AT3G02750 | UUCGAGAAUUAUGAUAUGUUA   | 448  | 4   | Cleavage    | [ Symbols:   Protein phosphatase 2C family protein   chr3:593207-595755 REVERSE LENGTH=2276                                                                                                                                                             |
| AT3G02810 | UACCGCUUGGUCGUUAUUAAG   | 185  | 4.5 | Cleavage    | [ Symbols:   Protein kinase superfamily protein   chr3:608460-610985 REVERSE LENGTH=2146                                                                                                                                                                |
| AT3G02875 | CGGAGAAUUCUACGACGCCGC   | 103  | 3.5 | Translation | [ Symbols: LRI ] Peptidase M20/M25/M40 family protein   chr3:631913-634074 FORWARD LENGTH=1624                                                                                                                                                          |
| AT3G02885 | UUCGACAGCAUAUGAUGAUUA   | 448  | 4   | Cleavage    | [ Symbols: GASAS ] GAST1 protein homolog 5   chr3:628021-639055 REVERSE LENGTH=640                                                                                                                                                                      |
| AT3G03040 | CUCAACAUGUAUUAAGGCGUU   | 208  | 4   | Cleavage    | [ Symbols:   F-box/RN1-like superfamily protein   chr3:684506-686544 FORWARD LENGTH=1748                                                                                                                                                                |
| AT3G03440 | CUGGGAGAAAGAGAAAGGCU    | 259  | 3.5 | Cleavage    | [ Symbols:   ARM repeat superfamily protein   chr3:815644-818834 FORWARD LENGTH=1558                                                                                                                                                                    |
| AT3G03570 | UCUGAUUGCAUUGUGGUGUACC  | 109  | 4.5 | Cleavage    | [ Symbols:   Protein of unknown function (DUF3550/UPD0682)   chr3:856876-860469 FORWARD LENGTH=2325                                                                                                                                                     |
| AT3G03580 | UUAACCCGUAUGGCGCUUACAA  | 130  | 4   | Translation | [ Symbols:   Tetraatricopeptide repeat (TPR)-like superfamily protein   chr3:860512-863352 REVERSE LENGTH=2841                                                                                                                                          |
| AT3G03630 | UUUUAACAUAAGGUUCCUGU    | 1055 | 2.5 | Cleavage    | [ Symbols: CS26 ] cysteine synthase 26   chr3:877928-880446 REVERSE LENGTH=1634                                                                                                                                                                         |
| AT3G03702 | AUUUACGAGGACGCUACUCCU   | 200  | 4.5 | Cleavage    | [ Symbols:   other RNA   chr3:916356-918834 REVERSE LENGTH=1451                                                                                                                                                                                         |
| AT3G03770 | AUUGAGCUGCGAUAGAGCCU    | 2734 | 4.5 | Cleavage    | [ Symbols:   Leucine-rich repeat protein kinase family protein   chr3:945135-949042 REVERSE LENGTH=2840                                                                                                                                                 |
| AT3G03810 | UCACUGUAUUCUGGAGUUU     | 123  | 2.5 | Cleavage    | [ Symbols: EDA30 ] O-fucosyltransferase family protein   chr3:971672-976367 REVERSE LENGTH=2867                                                                                                                                                         |
| AT3G03970 | UGUUAACGAGACUCUACGCCAG  | 574  | 5   | Cleavage    | [ Symbols:   ARM repeat superfamily protein   chr3:1027997-1030592 REVERSE LENGTH=1946                                                                                                                                                                  |
| AT3G04000 | AUUGAGCUGCGAUAGAGUACCU  | 2734 | 4   | Translation | [ Symbols:   NAD(P)-binding Rossmann-fold superfamily protein   chr3:1035500-1036672 FORWARD LENGTH=1056                                                                                                                                                |
| AT3G04020 | AUACCCAAACUAGAAUUCUUCU  | 127  | 4   | Cleavage    | [ Symbols:   unknown protein; Has 26 Blast hits to 25 proteins in 10 species: Archae - 0; Bacteria - 0; Metazoa - 0; Fungi - 0; Plants - 23; Viruses - 0; Other Eukaryotes - 3 (source: NCBI BLink). ]   chr3:1040548-1042518 FORWARD LENGTH=1056       |
| AT3G04310 | UUGAGAAUUAUUAUUGUUGGCG  | 138  | 3.5 | Cleavage    | [ Symbols:   unknown protein; Has 44 Blast hits to 44 proteins in 12 species: Archae - 0; Bacteria - 0; Metazoa - 0; Fungi - 0; Plants - 44; Viruses - 0; Other Eukaryotes - 0 (source: NCBI BLink). ]   chr3:1141581-1142528 REVERSE LENGTH=810        |
| AT3G04340 | CUAGAAUUCUUCUCCUUCUCCU  | 235  | 2.5 | Cleavage    | [ Symbols: emb2458 ] FtsH extracellular protease family   chr3:1146800-1153341 REVERSE LENGTH=4106                                                                                                                                                      |
| AT3G04350 | UUCGACGCUUGCUGAGCCCAAC  | 156  | 4.5 | Cleavage    | [ Symbols:   Plant protein of unknown function (DUF946)   chr3:1153727-1156776 REVERSE LENGTH=2256                                                                                                                                                      |
| AT3G04360 | UUAACAAGCCGUAUUCUCCU    | 125  | 4.5 | Cleavage    | [ Symbols:   Calcium-dependent lipid-binding (CalB domain) family protein   chr3:1157004-1158310 REVERSE LENGTH=1307                                                                                                                                    |
| AT3G04380 | UUUGAAUCUUGGAUACCUUA    | 227  | 4   | Translation | [ Symbols: SUVRA, SDG31 ] SET-domain containing protein lysine methyltransferase family protein   chr3:1161387-1164929 FORWARD LENGTH=2084                                                                                                              |
| AT3G04530 | UCUAGUUGCAUUUUUUGGAC    | 421  | 3.5 | Translation | [ Symbols: PPCK2, PEPC2, ATPPC2 ] phosphoenolpyruvate carboxylase kinase 2   chr3:1221546-1222655 FORWARD LENGTH=1036                                                                                                                                   |

|           |                         |       |     |             |                                                                                                                                                                                                                                                         |
|-----------|-------------------------|-------|-----|-------------|---------------------------------------------------------------------------------------------------------------------------------------------------------------------------------------------------------------------------------------------------------|
| AT3G04670 | UCUCAUGAGUUCUAGUACACA   | 115   | 5   | Cleavage    | [ Symbols: WRKY39, ATWRKY39   WRKY DNA-binding protein 39   chr3:1266295-1268287 REVERSE LENGTH=1824                                                                                                                                                    |
| AT3G04790 | UGAGAAAGAGUAGAAUAGAAUC  | 103   | 3.5 | Cleavage    | [ Symbols:   Ribose 5-phosphate isomerase, type A protein   chr3:1313316-1315243 FORWARD LENGTH=1928                                                                                                                                                    |
| AT3G04940 | UUGGACGCCUCUACUAGAGA    | 679   | 3.5 | Translation | [ Symbols: ATCYSD1, CYSD1   cysteine synthase D1   chr3:1365165-1367759 FORWARD LENGTH=1369                                                                                                                                                             |
| AT3G05050 | UACUCGACCACACUUGUAGGA   | 183   | 4   | Translation | [ Symbols:   Protein kinase superfamily protein   chr3:1408613-1411803 REVERSE LENGTH=2422                                                                                                                                                              |
| AT3G05060 | AUUGAUUCUGCACUACGAAGGC  | 128   | 3   | Cleavage    | [ Symbols:   NP056-like pre RNA processing ribonucleoprotein   chr3:1412867-1415966 REVERSE LENGTH=2016                                                                                                                                                 |
| AT3G05100 | UGACGGAAGCUACAGGAGUUG   | 108   | 4.5 | Cleavage    | [ Symbols:   S-adenosyl-L-methionine-dependent methyltransferases superfamily protein   chr3:1424093-1426000 FORWARD LENGTH=1406                                                                                                                        |
| AT3G05155 | UUUGUAGAGCAACGACUAGC    | 1012  | 3.5 | Cleavage    | [ Symbols:   Major facilitator superfamily protein   chr3:1448570-1451213 FORWARD LENGTH=1287                                                                                                                                                           |
| AT3G05220 | UAAGAGUGUAGUACGGUUGUCU  | 152   | 3   | Cleavage    | [ Symbols:   Heavy metal transport/detoxification superfamily protein   chr3:1488595-1491320 FORWARD LENGTH=2096                                                                                                                                        |
| AT3G05420 | UUUGUGUUCUGAGUCCCGCU    | 669   | 4.5 | Cleavage    | [ Symbols:   ACBP4   acyl-CoA binding protein 4   chr3:1561778-1567250 FORWARD LENGTH=2315                                                                                                                                                              |
| AT3G05520 | UGUCACCGUAGAUUUCUUCUC   | 123   | 3   | Translation | [ Symbols:   Subunits of heterodimeric actin filament capping protein Capz superfamily   chr3:1598547-1601310 FORWARD LENGTH=1167                                                                                                                       |
| AT3G05630 | UUUGUCACACAGUGGACUGUG   | 104   | 3   | Cleavage    | [ Symbols: PLDP2, PLD22, PLDZETA2   phospholipase D P2   chr3:1635200-1640348 FORWARD LENGTH=3505                                                                                                                                                       |
| AT3G05675 | UCGAGACCUACGUCUACUGCG   | 100   | 4   | Cleavage    | [ Symbols:   BTB/POZ domain-containing protein   chr3:1658271-1660306 REVERSE LENGTH=1927                                                                                                                                                               |
| AT3G05680 | UCUGUACCCUGUAAUUCUUC    | 275   | 4.5 | Cleavage    | [ Symbols: EMB2061   embryo defective 2016   chr3:1660552-1672522 REVERSE LENGTH=6833                                                                                                                                                                   |
| AT3G05685 | UUUGUCUAGAACAUUUCUCC    | 119   | 3.5 | Translation | [ Symbols:   Cystatin/monellin superfamily protein   chr3:1673780-1674908 REVERSE LENGTH=543                                                                                                                                                            |
| AT3G05690 | UGACGGUUCAGAUUACAGGAGC  | 107   | 4   | Translation | [ Symbols: UNE8, ATHAP28, HAP28, NF-YA2   nuclear factor Y, subunit A2   chr3:1676546-1678932 REVERSE LENGTH=1464                                                                                                                                       |
| AT3G05700 | UGAGACACAAACGGGAGAUUC   | 244   | 3   | Cleavage    | [ Symbols:   Drought-responsive family protein   chr3:1682088-1684572 REVERSE LENGTH=1265                                                                                                                                                               |
| AT3G05790 | UUUGAGAACUCCUGACCCGA    | 1272  | 5   | Cleavage    | [ Symbols: LON4   ion protease 4   chr3:1720154-1725182 REVERSE LENGTH=2829                                                                                                                                                                             |
| AT3G05840 | UUUGGCCUGAGGUGGAGACCC   | 133   | 4   | Cleavage    | [ Symbols:   ATSK12   Protein kinase superfamily protein   chr3:1740020-1743163 FORWARD LENGTH=1672                                                                                                                                                     |
| AT3G05880 | AUUUGGCCUGCAACUCUGCAA   | 204   | 5   | Cleavage    | [ Symbols:   RC12   Low temperature and salt responsive protein family   chr3:1755497-1756540 REVERSE LENGTH=495                                                                                                                                        |
| AT3G05990 | UUGGCCUGCAACUCUGCAAGGU  | 955   | 4.5 | Cleavage    | [ Symbols:   Leucine-rich repeat (LRR) family protein   chr3:1796852-1799870 REVERSE LENGTH=1956                                                                                                                                                        |
| AT3G06020 | UUUAGAGAUCCUUGUUAUCU    | 387   | 4.5 | Cleavage    | [ Symbols:   Protein of unknown function (DUF3049)   chr3:1813267-1814169 FORWARD LENGTH=903                                                                                                                                                            |
| AT3G06130 | UAAGCAUUUUGAUUACCCGGA   | 285   | 4   | Cleavage    | [ Symbols:   Heavy metal transport/detoxification superfamily protein   chr3:1852884-1855063 REVERSE LENGTH=1643                                                                                                                                        |
| AT3G06150 | UAAGCAUUGAUUAGAAUUGUAC  | 119   | 4   | Cleavage    | [ Symbols:   unknown protein; BEST Arabidopsis thaliana protein match is: unknown protein (TAIR:AT5G19060.1); Has 61 Blast hits to 59 proteins in 10 species: Archae - 0; Bacteria - 0; Metazoa - 3; Fungi - 0; Plants - 58; Viruses - 0; Other Eukaryo |
| AT3G06210 | CAUUGUUCUACAGCUGCGCU    | 190   | 5   | Cleavage    | [ Symbols:   ARM repeat superfamily protein   chr3:1880093-1883491 FORWARD LENGTH=2697                                                                                                                                                                  |
| AT3G06380 | UCUAGUUCGCAUUUUUUGGAC   | 421   | 3.5 | Cleavage    | [ Symbols:   ATLLP9, TLP9   tubby-like protein 9   chr3:1936124-1938221 FORWARD LENGTH=1596                                                                                                                                                             |
| AT3G06510 | UGAGAAAGAGUAGAAUAGAAUC  | 103   | 2   | Cleavage    | [ Symbols:   SF2R2, ATFSR2   Glycosyl hydrolase superfamily protein   chr3:2016330-2019778 FORWARD LENGTH=2234                                                                                                                                          |
| AT3G06540 | UUAGAACAGCCUGUAGGAUUG   | 102   | 3   | Translation | [ Symbols:   REP, AthREP   Rab escort protein   chr3:2035003-2037788 REVERSE LENGTH=2016                                                                                                                                                                |
| AT3G06580 | UUAGCACCCGAGGAGUAGGAC   | 291   | 3   | Cleavage    | [ Symbols:   GALL1, GALK   Mevalonate/galactokinase family protein   chr3:2048905-2052025 REVERSE LENGTH=1885                                                                                                                                           |
| AT3G06910 | UCUAGUUCACAUUUUUCGGAC   | 427   | 3.5 | Translation | [ Symbols:   ULP1A, ELS1, ATULP1a   UB-like protease 1A   chr3:2178630-2181197 REVERSE LENGTH=1793                                                                                                                                                      |
| AT3G06980 | AUGGAUUAAGAUACAUUCGCCUC | 196   | 3   | Cleavage    | [ Symbols:   DEA(D/H)-box RNA helicase family protein   chr3:2201467-2204833 FORWARD LENGTH=2581                                                                                                                                                        |
| AT3G07220 | UAACUUCUACCCUUUGACUCUG  | 727   | 3   | Cleavage    | [ Symbols:   SMAD/FHA domain-containing protein   chr3:2297886-2299572 FORWARD LENGTH=1210                                                                                                                                                              |
| AT3G07260 | UAACUUCUACCCUUUGACUCUG  | 727   | 3   | Cleavage    | [ Symbols:   SMAD/FHA domain-containing protein   chr3:2309704-2310788 FORWARD LENGTH=914                                                                                                                                                               |
| AT3G07270 | UUGGACACUCUCCUGACCCGA   | 160   | 4.5 | Cleavage    | [ Symbols:   GTP cyclohydrolase I   chr3:2313998-2317188 FORWARD LENGTH=1537                                                                                                                                                                            |
| AT3G07400 | UAUGUCUUCUGUUGUAUCCACU  | 344   | 3.5 | Cleavage    | [ Symbols:   lipase class 3 family protein   chr3:2367302-2372445 FORWARD LENGTH=3373                                                                                                                                                                   |
| AT3G07440 | UUGAGAGAUCCUUGUUAUCU    | 3917  | 3.5 | Translation | [ Symbols:   unknown protein; BEST Arabidopsis thaliana protein match is: unknown protein (TAIR:AT5G48530.1); Has 37 Blast hits to 37 proteins in 13 species: Archae - 0; Bacteria - 0; Metazoa - 0; Fungi - 0; Plants - 35; Viruses - 0; Other Eukaryo |
| AT3G07540 | UUACGAGACUUGACGCCAACU   | 447   | 4.5 | Translation | [ Symbols:   Actin-binding FH2 (formin homology 2) family protein   chr3:2404509-2407541 REVERSE LENGTH=2857                                                                                                                                            |
| AT3G07565 | UUUAGUCUUCUGUUGUACACC   | 153   | 3.5 | Translation | [ Symbols:   Protein of unknown function (DUF3755)   chr3:2413642-2416259 FORWARD LENGTH=1435                                                                                                                                                           |
| AT3G07610 | UGUCACCGUAGAUUUCUUCUCU  | 123   | 3.5 | Translation | [ Symbols:   BM1   Transcription factor jumoni (jnmC) domain-containing protein   chr3:2426069-2429358 FORWARD LENGTH=2368                                                                                                                              |
| AT3G07720 | UAAACUAGACCAUUGCCUAGA   | 302   | 3   | Cleavage    | [ Symbols:   Galactose oxidase/Kelch repeat superfamily protein   chr3:2465365-2467233 FORWARD LENGTH=1264                                                                                                                                              |
| AT3G07730 | UCUCAUGUAGUUCUAGUUCGCA  | 1437  | 4   | Cleavage    | [ Symbols:   unknown protein; BEST Arabidopsis thaliana protein match is: unknown protein (TAIR:AT4G01170.1); Has 1299 Blast hits to 1149 proteins in 206 species: Archae - 3; Bacteria - 100; Metazoa - 453; Fungi - 114; Plants - 108; Viruses - 2;   |
| AT3G07800 | UCUAGUUCGCCGUUUUUCAGAC  | 163   | 3.5 | Translation | [ Symbols:   Thymidine kinase   chr3:2489387-2491087 REVERSE LENGTH=1426                                                                                                                                                                                |
| AT3G08020 | UCUAGUUCGCCGUUUUUCAGAC  | 163   | 3   | Cleavage    | [ Symbols:   PHD finger family protein   chr3:2557437-2561802 REVERSE LENGTH=2924                                                                                                                                                                       |
| AT3G08040 | UCACUUGUAAUUCUGGGAGU    | 123   | 5   | Cleavage    | [ Symbols:   FRD3, MAN1, ATRFD3   MATE efflux family protein   chr3:2566443-2572151 REVERSE LENGTH=1848                                                                                                                                                 |
| AT3G08500 | UUUAGAGAUCCUUGUUAUCUG   | 387   | 4.5 | Translation | [ Symbols:   MYB83, ATMYB83   myb domain protein 83   chr3:2576794-2578246 REVERSE LENGTH=1370                                                                                                                                                          |
| AT3G08510 | UGGGCCUCAACUCUGCAAGGU   | 10625 | 4   | Translation | [ Symbols:   phospholipase C 2   chr3:2582382-2585851 REVERSE LENGTH=2136                                                                                                                                                                               |
| AT3G08530 | UUCUGAAGGACAAAGUACAGU   | 351   | 3   | Translation | [ Symbols:   Clathrin, heavy chain   chr3:2586806-2595572 REVERSE LENGTH=5638                                                                                                                                                                           |
| AT3G08720 | UGAGAGCACUCACCGGACU     | 230   | 4.5 | Translation | [ Symbols:   ATPK19, ATPK2   serine/threonine protein kinase 2   chr3:2648512-2650985 REVERSE LENGTH=1999                                                                                                                                               |
| AT3G08850 | UAUCUCGAGAGGACUGCGUGC   | 334   | 4.5 | Cleavage    | [ Symbols:   RAPTOR1B, ATRAPTOR1B, RAPTOR1   HEAT repeat ;WD domain, G-beta repeat protein protein   chr3:2686583-2695300 REVERSE LENGTH=4819                                                                                                           |
| AT3G08870 | UUUAGUCCGAGGAGUAGGGAU   | 112   | 4   | Cleavage    | [ Symbols:   Concanavalin A-like lectin protein kinase family protein   chr3:2700355-2702581 REVERSE LENGTH=2227                                                                                                                                        |
| AT3G08960 | UGAGCUGCGAUUAGGACUCUGA  | 416   | 4.5 | Translation | [ Symbols:   ARM repeat superfamily protein   chr3:2729819-2736884 REVERSE LENGTH=3591                                                                                                                                                                  |
| AT3G09035 | UUUAAACAACUAAAGGUUCCUG  | 1055  | 4   | Cleavage    | [ Symbols:   Concanavalin A-like lectin family protein   chr3:2758820-2760347 FORWARD LENGTH=1528                                                                                                                                                       |
| AT3G09060 | UUUAGGAUUGUUGCAUAUGCA   | 1164  | 4   | Translation | [ Symbols:   Pentatricopeptide repeat (PPR) superfamily protein   chr3:2766367-2768430 REVERSE LENGTH=2064                                                                                                                                              |
| AT3G09320 | UAUCGAGACCAUCUGCAUCUUGU | 142   | 5   | Cleavage    | [ Symbols:   DHHC-type zinc finger family protein   chr3:2861743-2864245 REVERSE LENGTH=1392                                                                                                                                                            |
| AT3G09330 | UUUGACGUCUCUACUUAUGAGA  | 437   | 2.5 | Cleavage    | [ Symbols:   Transmembrane amino acid transporter family protein   chr3:2864782-2867230 REVERSE LENGTH=1575                                                                                                                                             |
| AT3G09340 | UUUGACGUCUCUACUUAUGAGA  | 437   | 2.5 | Cleavage    | [ Symbols:   Transmembrane amino acid transporter family protein   chr3:2868050-2870526 REVERSE LENGTH=1587                                                                                                                                             |
| AT3G09370 | UUUGCGUUGUUAUCUACGAGU   | 114   | 3   | Cleavage    | [ Symbols:   MYB3R-3, A1MYB3R3   myb domain protein 3r-3   chr3:2879366-2882267 FORWARD LENGTH=1825                                                                                                                                                     |
| AT3G09400 | UCUGAACCCGUGAUUUCUUCUCC | 275   | 3   | Cleavage    | [ Symbols:   PLL3   pol-like 3   chr3:2891235-2893532 REVERSE LENGTH=1953                                                                                                                                                                               |
| AT3G09510 | ACAAACUUGUUGUACAAAGCCU  | 1107  | 3.5 | Cleavage    | [ Symbols:   Ribonuclease H-like superfamily protein   chr3:2921804-2923258 FORWARD LENGTH=1455                                                                                                                                                         |
| AT3G09550 | UUGGACUGGGAUAGGACUAGG   | 101   | 4.5 | Cleavage    | [ Symbols:   Ankryrin repeat family protein   chr3:2931865-2934354 FORWARD LENGTH=2121                                                                                                                                                                  |
| AT3G09680 | UGAAUUCUGUACUACUGGACC   | 197   | 5   | Cleavage    | [ Symbols:   Ribosomal protein S12/S23 family protein   chr3:2969045-2970371 REVERSE LENGTH=661                                                                                                                                                         |
| AT3G09850 | AUCAUCUCCUGGACUCAAACCC  | 222   | 3   | Cleavage    | [ Symbols:   D111/G-patch domain-containing protein   chr3:3023211-3025851 REVERSE LENGTH=2641                                                                                                                                                          |
| AT3G09880 | UUUAGAGAUCCUUGUUAUCUG   | 387   | 4.5 | Cleavage    | [ Symbols:   ATB BETA   Protein phosphatase 2A regulatory B subunit family protein   chr3:3029511-3032256 FORWARD LENGTH=2216                                                                                                                           |
| AT3G09920 | UGAGAACAUUGACUUCAGACU   | 158   | 3.5 | Cleavage    | [ Symbols:   PIP5K9   phosphatidylinositol monophosphate 5 kinase   chr3:3040303-3043912 REVERSE LENGTH=2807                                                                                                                                            |
| AT3G10040 | UGCAUUGUUGGAGAGUGCCUC   | 164   | 5   | Cleavage    | [ Symbols:   sequence-specific DNA binding transcription factors   chr3:3096415-3098071 REVERSE LENGTH=1657                                                                                                                                             |
| AT3G10180 | UUUUUCGGACUAGAUAGGACU   | 107   | 3   | Cleavage    | [ Symbols:   P-loop containing nucleoside triphosphate hydrolases superfamily protein   chr3:3146393-3154644 REVERSE LENGTH=3822                                                                                                                        |
| AT3G10200 | UUUAGGAUUGUUGCAUAUGAG   | 1164  | 4   | Cleavage    | [ Symbols:   S-adenosyl-L-methionine-dependent methyltransferases superfamily protein   chr3:3157608-3160188 FORWARD LENGTH=1958                                                                                                                        |
| AT3G10230 | UGAGAUUGCUAGAGGAAAGAG   | 101   | 3.5 | Cleavage    | [ Symbols:   LYC   lycopene cyclase   chr3:3164075-3166038 REVERSE LENGTH=1964                                                                                                                                                                          |
| AT3G10470 | UUAGACGACCAUCUCCGUCUCC  | 170   | 4.5 | Translation | [ Symbols:   CZH2-type zinc finger family protein   chr3:3260351-3261854 FORWARD LENGTH=1504                                                                                                                                                            |
| AT3G10510 | UUUAGAAAGCUUGUGGAUACAC  | 926   | 4   | Cleavage    | [ Symbols:   Galactose oxidase/Kelch repeat superfamily protein   chr3:3274220-3275551 REVERSE LENGTH=1116                                                                                                                                              |
| AT3G10550 | CGGAGAAACUUGAGACGGCC    | 103   | 3   | Cleavage    | [ Symbols:   MTM1, A1MTM1   Myotubularin-like phosphatases II superfamily   chr3:3292895-3298522 REVERSE LENGTH=2904                                                                                                                                    |
| AT3G10580 | UGGCAGUAGAGUACUAGAGGAC  | 163   | 4.5 | Cleavage    | [ Symbols:   Homodomain-like superfamily protein   chr3:3307051-3308237 REVERSE LENGTH=810                                                                                                                                                              |
| AT3G10650 | UUAGACCCGAGGAGUAGGACU   | 330   | 4   | Cleavage    | [ Symbols:   BEST Arabidopsis thaliana protein match is: nucleoporin-related (TAIR:AT5G02000.1); Has 61042 Blast hits to 31782 proteins in 2093 species: Archae - 202; Bacteria - 16480; Metazoa - 16017; Fungi - 12552; Plants - 1653; Viruses - 62;   |
| AT3G10690 | CAACUACACACGAGGGACGAC   | 198   | 5   | Cleavage    | [ Symbols:   GYRA   DNA GYRASE A   chr3:3339392-3346340 REVERSE LENGTH=3170                                                                                                                                                                             |
| AT3G10700 | UGCAUCUGCUAGGUUUGCGAGC  | 378   | 4.5 | Cleavage    | [ Symbols:   galAK   galacturonic acid kinase   chr3:3346578-3351023 REVERSE LENGTH=1646                                                                                                                                                                |
| AT3G10800 | UUUGGGUUGUGGUUUAACUGCU  | 225   | 3   | Cleavage    | [ Symbols:   BZIP28   Basic-leucine zipper (bZIP) transcription factor family protein   chr3:3379254-3381621 FORWARD LENGTH=2291                                                                                                                        |
| AT3G10840 | UGUGUAGUACAUUACUGGGAC   | 106   | 4   | Translation | [ Symbols:   alpha/beta-Hydrolases superfamily protein   chr3:3391065-3393290 REVERSE LENGTH=1552                                                                                                                                                       |
| AT3G11010 | UUAGACGACCAUCUCCGUCU    | 150   | 4.5 | Translation | [ Symbols:   ATRLP34, RLP34   receptor like protein 34   chr3:3450496-3453683 REVERSE LENGTH=2952                                                                                                                                                       |
| AT3G11130 | UUCUGAAGGACAAAGUACAGU   | 371   | 2.5 | Translation | [ Symbols:   Clathrin, heavy chain   chr3:3482149-3491908 REVERSE LENGTH=5785                                                                                                                                                                           |
| AT3G11270 | UGGGCGCUUUAUUAUUGGGUU   | 115   | 4   | Cleavage    | [ Symbols:   MEE34   Mov34/MPN/PAD-1 family protein   chr3:3528801-3531565 FORWARD LENGTH=1360                                                                                                                                                          |
| AT3G11320 | UCGAGUACACAGAAUGGGGCU   | 179   | 3.5 | Cleavage    | [ Symbols:   Nucleotide-sugar transporter family protein   chr3:3546646-3548856 REVERSE LENGTH=1615                                                                                                                                                     |
| AT3G11325 | UAUCUCUGUGCUUACGACCU    | 295   | 4   | Cleavage    | [ Symbols:   Phospholipid/glycerol acyltransferase family protein   chr3:3549771-3551661 REVERSE LENGTH=1395                                                                                                                                            |
| AT3G11370 | UAGGCGUUGAUUUGGACGCCU   | 875   | 4.5 | Cleavage    | [ Symbols:   Cysteine/Histidine-rich C1 domain family protein   chr3:3561099-3562880 FORWARD LENGTH=1782                                                                                                                                                |
| AT3G11710 | UUAGCAUCAGACUGCGCGUG    | 131   | 5   | Cleavage    | [ Symbols:   ATKRS-1   lysyl-tRNA synthetase 1   chr3:3702169-3705714 REVERSE LENGTH=2172                                                                                                                                                               |
| AT3G11830 | UGACCCACACUUGUAGGAUUC   | 121   | 4.5 | Translation | [ Symbols:   TCP-1/cpn60 chaperonin family protein   chr3:3732661-3736374 FORWARD LENGTH=1965                                                                                                                                                           |
| AT3G11920 | UUUGAGAAUCCUUGACCCGGA   | 1272  | 3.5 | Cleavage    | [ Symbols:   glutaredoxin-related   chr3:3772311-3774887 FORWARD LENGTH=1893                                                                                                                                                                            |
| AT3G11950 | UUUCUGACCGGACAGAUAGUG   | 480   | 4   | Cleavage    | [ Symbols:   TRAF-like superfamily protein   chr3:3783111-3785660 REVERSE LENGTH=2010                                                                                                                                                                   |
| AT3G12130 | UUUGACGUCUACUUAUGAGA    | 679   | 4.5 | Cleavage    | [ Symbols:   scpl14   serine carboxypeptidase-like 14   chr3:3894931-3901879 REVERSE LENGTH=1308                                                                                                                                                        |
| AT3G12180 | UAUGGCGUCCGGAGCAUCCGA   | 299   | 4   | Translation | [ Symbols:   RR1A   retinoblastoma-related 1   chr3:3913463-3919170 REVERSE LENGTH=3544                                                                                                                                                                 |
| AT3G12350 | UUUCUAGUAGCAUGUGGUUACC  | 110   | 4.5 | Cleavage    | [ Symbols:   F-box family protein   chr3:3931555-3932849 FORWARD LENGTH=1159                                                                                                                                                                            |

|           |                           |      |     |             |                                                                                                                                                                                                                                                          |
|-----------|---------------------------|------|-----|-------------|----------------------------------------------------------------------------------------------------------------------------------------------------------------------------------------------------------------------------------------------------------|
| AT3G12540 | UGUGGUGUACUCUCCACGUCU     | 112  | 3   | Cleavage    | [ Symbols:   Protein of unknown function, DUF547   chr3:3975246-3977312 FORWARD LENGTH=1583                                                                                                                                                              |
| AT3G12550 | CUUGUGAGUGUUAUGUGAGGUC    | 103  | 4   | Cleavage    | [ Symbols:   XH/XS domain-containing protein   chr3:3978005-3981762 FORWARD LENGTH=2491                                                                                                                                                                  |
| AT3G12570 | UAGCUACAAGAAACUUCUUCU     | 1828 | 4   | Cleavage    | [ Symbols: FVD   FVD   chr3:3988743-3991052 FORWARD LENGTH=1748                                                                                                                                                                                          |
| AT3G12590 | UGACGCCAAUUCUGAAAGUUGU    | 154  | 3.5 | Cleavage    | [ Symbols:   unknown protein; INVOLVED IN: biological_process unknown; LOCATED IN: chloroplast; Has 50 Blast hits to 41 proteins in 15 species: Archae - 0; Bacteria - 0; Metazoa - 2; Fungi - 0; Plants - 43; Viruses - 0; Other Eukaryotes - 5 (source |
| AT3G12610 | UUUCGUGUUGUGUGCGCCAC      | 458  | 5   | Translation | [ Symbols: DRT100   Leucine-rich repeat (LRR) family protein   chr3:4006399-4007807 REVERSE LENGTH=1409                                                                                                                                                  |
| AT3G12650 | UCUGAAUCUCAAAGCACCACAA    | 493  | 5   | Cleavage    | [ Symbols:   unknown protein; FUNCTIONS IN: molecular_function unknown; INVOLVED IN: biological_process unknown; LOCATED IN: mitochondrion; EXPRESSED IN: 23 plant structures; EXPRESSED DURING: 15 growth stages; Has 31 Blast hits to                  |
| AT3G12710 | UAACUCUACCCUUCUAGCAGUC    | 727  | 4   | Translation | [ Symbols: DNA glycosylase superfamily protein   chr3:4040524-4041582 REVERSE LENGTH=1341                                                                                                                                                                |
| AT3G12730 | UGUGGACUGAGUAGUACACACU    | 163  | 4.5 | Cleavage    | [ Symbols:   Homeodomain-like superfamily protein   chr3:4040702-4048614 REVERSE LENGTH=1128                                                                                                                                                             |
| AT3G12750 | UUUAGCGACCUAGCUACUACUG    | 142  | 4   | Cleavage    | [ Symbols: ZIP1   zinc transporter 1 precursor   chr3:4051651-4053201 REVERSE LENGTH=1412                                                                                                                                                                |
| AT3G12830 | UUUAAACAACUAGUGUUCUGU     | 1055 | 4   | Cleavage    | [ Symbols:   SAUR-like auxin-responsive protein family   chr3:4078651-4079608 REVERSE LENGTH=958                                                                                                                                                         |
| AT3G12940 | UUUGGCGUGAGGUUGGACGCC     | 367  | 4   | Cleavage    | [ Symbols:   2-oxoglutarate (2OG) and Fe(II)-dependent oxygenase superfamily protein   chr3:4130007-4132467 REVERSE LENGTH=2215                                                                                                                          |
| AT3G12955 | UGUGGUGUGAGUAGGACAAUCU    | 111  | 4.5 | Cleavage    | [ Symbols:   SAUR-like auxin-responsive protein family   chr3:4135500-4136143 REVERSE LENGTH=644                                                                                                                                                         |
| AT3G12960 | AUCCAAGUGAGUCACUUCUCC     | 1104 | 4   | Cleavage    | [ Symbols:   unknown protein; Has 44 Blast hits to 44 proteins in 14 species: Archae - 0; Bacteria - 0; Metazoa - 0; Fungi - 0; Plants - 44; Viruses - 0; Other Eukaryotes - 0 (source: NCBI BLINK).   chr3:4136488-4136828 FORWARD LENGTH=341           |
| AT3G13030 | UACACUCACUUGAUUCUAGGUC    | 223  | 4.5 | Cleavage    | [ Symbols:   hAT transposon superfamily protein   chr3:4169541-4171778 REVERSE LENGTH=2130                                                                                                                                                               |
| AT3G13120 | UCACUGUGAAUUCUGGAGUUG     | 123  | 4.5 | Cleavage    | [ Symbols:   Ribosomal protein S10p/S20e family protein   chr3:4219775-4221630 REVERSE LENGTH=1027                                                                                                                                                       |
| AT3G13380 | UUUAAAACCGUAGCAUUGGCG     | 115  | 3   | Cleavage    | [ Symbols: BRL3   BRI1-like 3   chr3:4346557-4350923 FORWARD LENGTH=4274                                                                                                                                                                                 |
| AT3G13530 | UAGGCCUGAGAUUGGACGCCU     | 875  | 4   | Cleavage    | [ Symbols: MAPKKK7, MAP3KE1   mitogen-activated protein kinase kinase kinase 7   chr3:4411688-4419320 REVERSE LENGTH=4353                                                                                                                                |
| AT3G13560 | UGUUGAUCCAAGUAGCUGACU     | 608  | 3.5 | Cleavage    | [ Symbols:   O-Glycosyl hydrolases family 17 protein   chr3:4425227-4428179 REVERSE LENGTH=2119                                                                                                                                                          |
| AT3G13600 | UUUAAACAACUAAAGUUCUCUG    | 1055 | 3.5 | Cleavage    | [ Symbols:   calmodulin-binding family protein   chr3:4445102-4447383 FORWARD LENGTH=1818                                                                                                                                                                |
| AT3G13610 | UGCGUCUCAAACUAAACACGUG    | 129  | 5   | Cleavage    | [ Symbols:   2-oxoglutarate (2OG) and Fe(II)-dependent oxygenase superfamily protein   chr3:4449374-4450811 FORWARD LENGTH=1355                                                                                                                          |
| AT3G13640 | UUUGGCGUGAGGUUGGACGCC     | 367  | 3.5 | Cleavage    | [ Symbols: ATRU1L, RL1   RNase I inhibitor protein 1   chr3:4458461-4461733 REVERSE LENGTH=2197                                                                                                                                                          |
| AT3G13674 | UUUGAUUACCCGGAUAAACUC     | 175  | 3   | Translation | [ Symbols:   unknown protein; FUNCTIONS IN: molecular_function unknown; INVOLVED IN: biological_process unknown; LOCATED IN: chloroplast; EXPRESSED IN: 17 plant structures; EXPRESSED DURING: 11 growth stages; BEST Arabidopsis thali                  |
| AT3G13695 | UUUUAUUAAGGAGUUAUAGGCG    | 115  | 3.5 | Translation | [ Symbols:   Protein kinase protein with adenosine nucleotide alpha hydrolases-like domain   chr3:4485735-4490231 FORWARD LENGTH=3321                                                                                                                    |
| AT3G13790 | CAUUAUCUACAGUUCUGCGGU     | 190  | 5   | Cleavage    | [ Symbols: ATRFUCT1   Glycosyl hydrolases family 32 protein   chr3:4532913-4535867 REVERSE LENGTH=1953                                                                                                                                                   |
| AT3G13882 | UUUAUACCAAGAACUUCUGGCC    | 310  | 3.5 | Cleavage    | [ Symbols: Ribosomal protein L34   chr3:4574526-4576048 FORWARD LENGTH=714                                                                                                                                                                               |
| AT3G13920 | UUUGAGGUCUCUACUUAUGAGA    | 437  | 3.5 | Translation | [ Symbols: EIF4A1   eukaryotic translation initiation factor 4A1   chr3:4592615-4594999 REVERSE LENGTH=1467                                                                                                                                              |
| AT3G13940 | UACUGGAGGACGCUACAGCACU    | 949  | 5   | Cleavage    | [ Symbols:   DNA binding,DNA-directed RNA polymerases   chr3:4600492-4602486 REVERSE LENGTH=1558                                                                                                                                                         |
| AT3G14000 | UACUUCUACGCGUUCUGUAGCC    | 826  | 3.5 | Translation | [ Symbols: ATRXLX12, BRX-LIKE2   DZC (Disease resistance/zinc finger/chromosome condensation-like region) domain containing protein   chr3:4630869-4633411 REVERSE LENGTH=1484                                                                           |
| AT3G14050 | ACAAACUUGUUGUACAAAGCC     | 1107 | 3.5 | Cleavage    | [ Symbols: RSH2, ATR-RSH2, ATRSH2   RELA/SPOT homolog 2   chr3:4650757-4653914 REVERSE LENGTH=2675                                                                                                                                                       |
| AT3G14170 | UUUGAGCACUUGUUGAGCCGCU    | 154  | 4.5 | Translation | [ Symbols:   Plant protein of unknown function (DUF936)   chr3:4695655-4698120 REVERSE LENGTH=1799                                                                                                                                                       |
| AT3G14210 | UGAAGGAUUUGUGUUAACCA      | 474  | 4   | Cleavage    | [ Symbols: ESM1   ephthiospecifier modifier 1   chr3:4729823-4731803 FORWARD LENGTH=1483                                                                                                                                                                 |
| AT3G14220 | UCUGUACCCGUGAUUUCUUC      | 275  | 3   | Translation | [ Symbols:   GDSL-like Lipase/Acylhydrolase superfamily protein   chr3:4732893-4734609 FORWARD LENGTH=1364                                                                                                                                               |
| AT3G14300 | UCUUGCACUGAGUAGGACGCCU    | 355  | 4   | Cleavage    | [ Symbols: ATPMEPCRC, ATPME26, PME26   pectinesterase family protein   chr3:4766905-4769898 REVERSE LENGTH=2907                                                                                                                                          |
| AT3G14350 | UGCGCUCAAACUAAACACGUG     | 129  | 5   | Cleavage    | [ Symbols: SRF7   STRUBBELIG-receptor family 7   chr3:4782757-4787236 REVERSE LENGTH=2749                                                                                                                                                                |
| AT3G14520 | UGUGGUGUACCUUCUACGUCU     | 112  | 4   | Translation | [ Symbols:   Terpenoid cyclases/Protein prenyltransferases superfamily protein   chr3:4875748-4878336 REVERSE LENGTH=2031                                                                                                                                |
| AT3G14540 | UGUGGUGUACCUUCUACGUCU     | 112  | 4   | Translation | [ Symbols:   Terpenoid cyclases/Protein prenyltransferases superfamily protein   chr3:4881439-4883936 REVERSE LENGTH=1984                                                                                                                                |
| AT3G14650 | UUACAUUGUCCGGGUGAGGCGA    | 461  | 4.5 | Cleavage    | [ Symbols: CYP72A11   cytochrome P450, family 72, subfamily A, polypeptide 11   chr3:4922131-4924694 FORWARD LENGTH=2143                                                                                                                                 |
| AT3G14690 | UUACAUUGUCCGGGUGAGGCGA    | 461  | 4.5 | Cleavage    | [ Symbols: CYP72A15   cytochrome P450, family 72, subfamily A, polypeptide 15   chr3:4937317-4939465 FORWARD LENGTH=1787                                                                                                                                 |
| AT3G14720 | CUUGGACUGCAUUAUUAACUCU    | 1059 | 4.5 | Cleavage    | [ Symbols: ATPMK19, MPK19   MAP kinase 19   chr3:4945601-4949942 FORWARD LENGTH=2389                                                                                                                                                                     |
| AT3G14730 | UUAGGCGUCGAGAUUGGACGCC    | 196  | 4.5 | Cleavage    | [ Symbols:   Pentatricopeptide repeat (PPR) superfamily protein   chr3:4949385-4951346 REVERSE LENGTH=1962                                                                                                                                               |
| AT3G14790 | UGAAGGACAAGCUACGUCUGU     | 1483 | 3   | Translation | [ Symbols: RHM3, ATRHM3   rhamnose biosynthesis 3   chr3:4964155-4967075 FORWARD LENGTH=2348                                                                                                                                                             |
| AT3G14830 | UACUUCUACGCGUUCUAGAGCC    | 826  | 4.5 | Translation | [ Symbols:   unknown protein; BEST Arabidopsis thaliana protein match is: unknown protein (TAIR:AT1G53450.2); Has 73 Blast hits to 73 proteins in 12 species: Archae - 0; Bacteria - 0; Metazoa - 0; Fungi - 0; Plants - 73; Viruses - 0; Other Eukaryo  |
| AT3G14850 | UCCUAGUACUUCUUCUCCAAG     | 209  | 2.5 | Translation | [ Symbols: TBL11   TRICHOME BIREFRINGENCE-LIKE 41   chr3:4996448-4997693 FORWARD LENGTH=988                                                                                                                                                              |
| AT3G14930 | UCUAGUUCACAUUUUUUGGAC     | 427  | 3.5 | Translation | [ Symbols: HEME1   Uroporphyrinogen decarboxylase   chr3:5020570-5022930 FORWARD LENGTH=1715                                                                                                                                                             |
| AT3G15030 | UAGAGUUGUUGCAUGUAGUCCA    | 232  | 4   | Cleavage    | [ Symbols: TCP4   TCP family transcription factor 4   chr3:5061681-5064115 FORWARD LENGTH=2033                                                                                                                                                           |
| AT3G15060 | UAGUGACCGGAGUAGUACAGCC    | 461  | 4.5 | Translation | [ Symbols: ATRABA1g, RABA1g   RAB GTPase homolog A1G   chr3:5069166-5070200 FORWARD LENGTH=902                                                                                                                                                           |
| AT3G15090 | AAUUCGAGAACUCCUGCAGCC     | 255  | 4.5 | Cleavage    | [ Symbols:   GroE-like zinc-binding alcohol dehydrogenase family protein   chr3:5076689-5079117 FORWARD LENGTH=1506                                                                                                                                      |
| AT3G15130 | UACGCUAGGAGAUUAGUUCUCC    | 122  | 5   | Cleavage    | [ Symbols:   Tetraatricopeptide repeat (TPR)-like superfamily protein   chr3:5097153-5099222 REVERSE LENGTH=2070                                                                                                                                         |
| AT3G15351 | UCUGUAGUGAUUGUGGAGACU     | 466  | 5   | Cleavage    | [ Symbols:   unknown protein; Has 50 Blast hits to 50 proteins in 16 species: Archae - 0; Bacteria - 0; Metazoa - 7; Fungi - 0; Plants - 43; Viruses - 0; Other Eukaryotes - 0 (source: NCBI BLINK).   chr3:5176059-5177648 FORWARD LENGTH=688           |
| AT3G15400 | UUUUUUAUUCGCGGAUUAACUC    | 104  | 4   | Cleavage    | [ Symbols: ATAZ20   anther 20   chr3:5201644-5203197 FORWARD LENGTH=1414                                                                                                                                                                                 |
| AT3G15450 | UCCUUAACGACUGGAAGAACGC    | 272  | 3.5 | Cleavage    | [ Symbols:   Aluminium induced protein with YGL and LDR motifs   chr3:5212984-5214119 FORWARD LENGTH=882                                                                                                                                                 |
| AT3G15470 | CACGCUUCUGUAGUACAUUCUAG   | 133  | 3.5 | Cleavage    | [ Symbols:   Transducin/WD40 repeat-like superfamily protein   chr3:5216262-5220218 REVERSE LENGTH=3370                                                                                                                                                  |
| AT3G15520 | AUUGUGUUAUUAUUUGAGCCU     | 108  | 3.5 | Translation | [ Symbols:   Cydophilin-like peptidyl-prolyl cis-trans isomerase family protein   chr3:5249599-5252506 REVERSE LENGTH=1615                                                                                                                               |
| AT3G15530 | UCCACGACUAGUAGCAUAUGU     | 1524 | 3   | Translation | [ Symbols:   S-adenosyl-L-methionine-dependent methyltransferases superfamily protein   chr3:5252875-5254562 REVERSE LENGTH=1508                                                                                                                         |
| AT3G15620 | UUGAGGACUAGUAGGACGCGU     | 875  | 4.5 | Cleavage    | [ Symbols: ROD1   phosphatidic acid phosphatase-related / PAP2-related   chr3:5351071-5353728 FORWARD LENGTH=1207                                                                                                                                        |
| AT3G15980 | UUUGGAGACUUAUAGCACAGAG    | 515  | 4   | Cleavage    | [ Symbols:   Coatomer, beta' subunit   chr3:5411292-5418493 REVERSE LENGTH=3356                                                                                                                                                                          |
| AT3G16000 | CACGCUUCUUGUAUACAUUAG     | 133  | 4   | Cleavage    | [ Symbols: MFP1   MAR binding filament-like protein 1   chr3:5430889-5433817 REVERSE LENGTH=2537                                                                                                                                                         |
| AT3G16230 | UUUCUAGGAGCAAGUUCUAGCU    | 1012 | 4   | Cleavage    | [ Symbols:   Predicted eukaryotic LigT   chr3:5500178-5503545 FORWARD LENGTH=1710                                                                                                                                                                        |
| AT3G16250 | CACUUAACAACGAGGCGACUG     | 198  | 4   | Cleavage    | [ Symbols: NDF4   NDH-dependent cyclic electron flow 1   chr3:5506931-5508414 REVERSE LENGTH=869                                                                                                                                                         |
| AT3G16310 | UCUAGUUGCAUUAUUUGGAC      | 421  | 2   | Cleavage    | [ Symbols:   Mitochondrial phosphoprotein N' end (MPPN) family protein   chr3:5526414-5528602 REVERSE LENGTH=1341                                                                                                                                        |
| AT3G16340 | UUAGACUCUUGCAGAGUUGAGCGCC | 104  | 2.5 | Translation | [ Symbols: ATPDR1, PDR1   pleiotropic drug resistance 1   chr3:5539897-5546417 FORWARD LENGTH=4405                                                                                                                                                       |
| AT3G16560 | UUUCUGCGGACAAGAUUAAGCU    | 313  | 4.5 | Cleavage    | [ Symbols:   Protein phosphatase 2C family protein   chr3:5635596-5638482 REVERSE LENGTH=2166                                                                                                                                                            |
| AT3G16570 | UUGAGAGAUACAUUGACGCGU     | 731  | 2.5 | Cleavage    | [ Symbols: RALF23, ATRALF23   rapid alkalization factor 23   chr3:5644698-5645414 FORWARD LENGTH=717                                                                                                                                                     |
| AT3G16610 | UGUGGAUACAAGAGCUGGGCU     | 215  | 5   | Translation | [ Symbols:   pentatricopeptide (PPR) repeat-containing protein   chr3:5656371-5658335 REVERSE LENGTH=1965                                                                                                                                                |
| AT3G16785 | UGACGCCAAUUCUGAAAGUUGU    | 154  | 4.5 | Cleavage    | [ Symbols: PLDP1, PLD21, PLDZETA1, PLD ZETA 1   phospholipase D P1   chr3:5711082-5719023 FORWARD LENGTH=3865                                                                                                                                            |
| AT3G16800 | CACGCUUCUGUAGUACAUUAG     | 133  | 3   | Cleavage    | [ Symbols:   Protein phosphatase 2C family protein   chr3:5721105-5723185 FORWARD LENGTH=1406                                                                                                                                                            |
| AT3G16840 | UUUGAGAGCACUACACGACGUG    | 261  | 4.5 | Translation | [ Symbols:   P-loop containing nucleoside triphosphate hydrolases superfamily protein   chr3:5737886-5743144 REVERSE LENGTH=2717                                                                                                                         |
| AT3G17000 | UCUGUACCGGUGUAGUUCUUC     | 275  | 3.5 | Cleavage    | [ Symbols: UBQC3   ubiquitin-conjugating enzyme 32   chr3:5797179-5799683 FORWARD LENGTH=1263                                                                                                                                                            |
| AT3G17020 | UUUGAGUAGUACCCUUGUAGGUC   | 3917 | 4   | Cleavage    | [ Symbols:   Adenosine nucleotide alpha hydrolases-like superfamily protein   chr3:5802536-5804157 REVERSE LENGTH=778                                                                                                                                    |
| AT3G17120 | UAGAGUUAUUGGGAGUUAUAGC    | 199  | 4   | Cleavage    | [ Symbols:   unknown protein; BEST Arabidopsis thaliana protein match is: unknown protein (TAIR:AT1G02380.1); Has 67 Blast hits to 67 proteins in 11 species: Archae - 0; Bacteria - 0; Metazoa - 0; Fungi - 0; Plants - 67; Viruses - 0; Other Eukaryo  |
| AT3G17185 | UGAGAAGAGUAGAUUAUUAACUC   | 103  | 3   | Cleavage    | [ Symbols: TASIR-ARF, TAS3, ATAS3   TAS3/TASIR-ARF (TRANS-ACTING SIRNA3); other RNA   chr3:5861491-5862437 FORWARD LENGTH=947                                                                                                                            |
| AT3G17203 | UUUUUAUUAACUAGUAGCAGCU    | 133  | 4   | Cleavage    | [ Symbols: GA2OX5   a pseudogene initially named GA2ox5 and thought to be a member of the gibberellin 2-oxidase enzyme family. It was later shown to have a large DNA insert in the putative gene model.   chr3:5870787-5872854 FORWARD LI               |
| AT3G17310 | UAUGGAGUAGUACGCAUUGGC     | 937  | 2.5 | Cleavage    | [ Symbols: DRM3, AIDRM3   S-adenosyl-L-methionine-dependent methyltransferases superfamily protein   chr3:5909001-5913242 REVERSE LENGTH=2641                                                                                                            |
| AT3G17440 | UAUCGAGCACUACUAGCUCU1G    | 142  | 4.5 | Translation | [ Symbols: NPSN13, ATPNSN13   novel plant snare 13   chr3:5969564-5972502 REVERSE LENGTH=1371                                                                                                                                                            |
| AT3G17590 | UUUUUCGGACUAGUAGGAGCU     | 107  | 3.5 | Cleavage    | [ Symbols: BSH, CHE1   transcription regulatory protein SNF5, putative (BSH)   chr3:6017212-6019666 REVERSE LENGTH=899                                                                                                                                   |
| AT3G17630 | UCGGGACUCUGCUAGUAGGUCU    | 135  | 3   | Cleavage    | [ Symbols: ATCHX19, CHX19   cation/H+ exchanger 19   chr3:6029201-6031773 FORWARD LENGTH=2403                                                                                                                                                            |
| AT3G17700 | UUGAGAGAUACAUUGACGCGU     | 731  | 3   | Translation | [ Symbols: CNBT1, CNGC20, ATCNGC20   cyclic nucleotide-binding transporter 1   chr3:6048916-6052552 FORWARD LENGTH=2556                                                                                                                                  |
| AT3G17780 | UGGAUUCGGGUGUAGUAGGUC     | 392  | 5   | Cleavage    | [ Symbols:   FUNCTIONS IN: molecular_function unknown; INVOLVED IN: intracellular protein transport; LOCATED IN: endomembrane system, integral to membrane, endoplasmic reticulum; EXPRESSED IN: 23 plant structures; EXPRESSED DURIN                    |
| AT3G17810 | UUUGAUCCGAGGAGUAGGUAU     | 816  | 2.5 | Cleavage    | [ Symbols: PYD1   pyrimidine 1   chr3:6094098-6096566 FORWARD LENGTH=1739                                                                                                                                                                                |
| AT3G17880 | UUUUGCUUAGACUUAUAGAAUC    | 179  | 3   | Cleavage    | [ Symbols: HIP, ATDX1, ATHIP2, TDX   tetraatricopeptide domain-containing thioredoxin   chr3:6123409-6126281 FORWARD LENGTH=1415                                                                                                                         |
| AT3G18020 | UUUAGGAUUGUUGCAUUAUGCA    | 1164 | 3.5 | Cleavage    | [ Symbols:   Pentatricopeptide repeat (PPR) superfamily protein   chr3:6165449-6167515 FORWARD LENGTH=2067                                                                                                                                               |
| AT3G18030 | UCCGCUAGAUUAUUAACAACUG    | 281  | 4   | Cleavage    | [ Symbols: ATHAL3A, HAL3A, HAL3, ATHAL3   HAL3-like protein A   chr3:6167640-6168948 REVERSE LENGTH=1192                                                                                                                                                 |
| AT3G18160 | CCUGAGCCUAGUGACGACGAGU    | 170  | 4   | Cleavage    | [ Symbols: PEK3-1   peroxin 3-1   chr3:6220918-6223073 FORWARD LENGTH=1281                                                                                                                                                                               |
| AT3G18210 | UUUGAGCACUUCUACAGACAGG    | 262  | 3   | Cleavage    | [ Symbols:   2-oxoglutarate (2OG) and Fe(II)-dependent oxygenase superfamily protein   chr3:6237930-6240605 REVERSE LENGTH=1631                                                                                                                          |
| AT3G18230 | UAUAGGCGUUGAAAGAAAGUUC    | 535  | 3.5 | Cleavage    | [ Symbols:   Octicosapeptide/Phox/Bem1p family protein   chr3:6251483-6254221 FORWARD LENGTH=2263                                                                                                                                                        |
| AT3G18390 | UUUGAUUAUCCCGUUGUACUG     | 106  | 4.5 | Cleavage    | [ Symbols: EMB31865   CRS1 / YhbY (CRM) domain-containing protein   chr3:62513485-6317971 FORWARD LENGTH=3021                                                                                                                                            |
| AT3G18520 | UAGAGGAUUAUUGUGUUAACCA    | 474  | 3   | Cleavage    | [ Symbols:   DHHC-type zinc-finger family protein   chr3:6408318-6411054 FORWARD LENGTH=1917                                                                                                                                                             |
| AT3G18710 | UCACAUUUGCGAGCUUGUAGCC    | 187  | 3   | Cleavage    | [ Symbols: PUB29, ATPUB29   plant U-box 29   chr3:6434083-6435561 REVERSE LENGTH=1479                                                                                                                                                                    |
| AT3G18770 | UAUGCAUAAUCUUGGACUUAUC    | 333  | 3   | Cleavage    | [ Symbols:   Autophagy-related protein 13   chr3:6459884-6463059 REVERSE LENGTH=2343                                                                                                                                                                     |

|           |                        |       |     |             |                                                                                                                                                                                                                                                         |
|-----------|------------------------|-------|-----|-------------|---------------------------------------------------------------------------------------------------------------------------------------------------------------------------------------------------------------------------------------------------------|
| AT3G18790 | UGUGGAUACAAGAUUGGGCU   | 111   | 4   | Cleavage    | [ Symbols:   FUNCTIONS IN: molecular_function unknown; INVOLVED IN: biological_process unknown; LOCATED IN: chloroplast; EXPRESSED IN: 22 plant structures; EXPRESSED DURING: 13 growth stages; CONTAINS InterPro DOMAIN/s: Isy1-like                   |
| AT3G18820 | UUAGACCGGAGGAUGAGGACU  | 330   | 3.5 | Cleavage    | [ Symbols: ATRABG3F, ATRAB7B, RAB71, RABG3F, RAB7B   RAB GTPase homolog G3F   chr3:6484068-6486247 FORWARD LENGTH=1061                                                                                                                                  |
| AT3G19050 | CUAGAAUUCUUGCCUUAACU   | 235   | 2.5 | Cleavage    | [ Symbols: POK2   phragmoplast orienting kinesin 2   chr3:6577724-6590188 FORWARD LENGTH=8598                                                                                                                                                           |
| AT3G19130 | AUUGACGUCGAGUAUGAGCCU  | 2734  | 4   | Cleavage    | [ Symbols: ATRBP47B, RBP47B   RNA-binding protein 47B   chr3:6611198-6614044 REVERSE LENGTH=1729                                                                                                                                                        |
| AT3G19180 | UAGUGACCCGAGUAGUACACC  | 461   | 5   | Cleavage    | [ Symbols: ARC6H, PARC6, ATCDP1, CDP1   paralog of ARC6   chr3:6632676-6637224 FORWARD LENGTH=2865                                                                                                                                                      |
| AT3G19190 | UGACACCGAUUCUGUAUGUCU  | 823   | 4   | Translation | [ Symbols: ATATG2, ATG2   autophagy 2   chr3:6639711-6648857 FORWARD LENGTH=5990                                                                                                                                                                        |
| AT3G19300 | UAGAGUGUUCUAUGUAUGGCUA | 232   | 4   | Cleavage    | [ Symbols:   Protein kinase superfamily protein   chr3:6690118-6693284 REVERSE LENGTH=2190                                                                                                                                                              |
| AT3G19340 | UCUUGUGUAGAGUAGGAGCCU  | 355   | 5   | Cleavage    | [ Symbols:   Protein of unknown function [DUF3754]   chr3:6701273-6704226 REVERSE LENGTH=1733                                                                                                                                                           |
| AT3G19460 | UACAAGAUAUGCUUAAGUAAAC | 189   | 4.5 | Cleavage    | [ Symbols:   Reticulon family protein   chr3:674370-6749307 FORWARD LENGTH=1517                                                                                                                                                                         |
| AT3G19510 | UUUUGAUGUAUGGAUAACCU   | 768   | 4   | Translation | [ Symbols: HAT3.1   Homeodomain-like protein with RING/YFVE/PHD-type zinc finger domain   chr3:6762764-6766588 REVERSE LENGTH=2769                                                                                                                      |
| AT3G19550 | UAUGGAUGUAUGCGGAUUGGC  | 937   | 2.5 | Cleavage    | [ Symbols:   unknown protein; FUNCTIONS IN: molecular_function unknown; INVOLVED IN: biological_process unknown; LOCATED IN: mitochondrion; EXPRESSED IN: 15 plant structures; EXPRESSED DURING: 9 growth stages; Has 36 Blast hits to                  |
| AT3G19560 | UCCGCUAGAUAAUUAUACAACU | 281   | 3   | Cleavage    | [ Symbols:   F-box family protein   chr3:6793311-6794802 FORWARD LENGTH=1267                                                                                                                                                                            |
| AT3G19600 | UUAGAGGAUUUGUGGUUAACCA | 106   | 3   | Cleavage    | [ Symbols:   Haloacid dehalogenase-like hydrolase (HAD) superfamily protein   chr3:6810669-6811742 REVERSE LENGTH=950                                                                                                                                   |
| AT3G19710 | UCAUUGGACAUUUGGCUACACC | 101   | 3.5 | Cleavage    | [ Symbols: BCAT4   branched-chain aminotransferase4   chr3:6846969-6849497 FORWARD LENGTH=1366                                                                                                                                                          |
| AT3G19850 | UAUUGAUUUUUGGCCUGAGGU  | 116   | 3   | Cleavage    | [ Symbols:   Phototropic-responsive NPH3 family protein   chr3:6898181-6901255 REVERSE LENGTH=1965                                                                                                                                                      |
| AT3G19880 | CUUCCCUAGAAUUCUUUCCU   | 401   | 3.5 | Translation | [ Symbols:   F-box and associated interaction domains-containing protein   chr3:6911435-6912604 REVERSE LENGTH=1170                                                                                                                                     |
| AT3G19910 | UUGGGAAGCAUUGACACGAG   | 515   | 2.5 | Translation | [ Symbols:   RING/U-box superfamily protein   chr3:6926308-6929567 FORWARD LENGTH=1455                                                                                                                                                                  |
| AT3G19960 | UAGAUAUACAUGUCUUGGCA   | 194   | 3.5 | Cleavage    | [ Symbols:   ATM1   myosin 1   chr3:6948776-6956966 FORWARD LENGTH=4062                                                                                                                                                                                 |
| AT3G19990 | UCUGAACUCAAGGACCCAAAC  | 493   | 3.5 | Cleavage    | [ Symbols:   unknown protein; INVOLVED IN: biological_process unknown; LOCATED IN: chloroplast stroma, chloroplast; EXPRESSED IN: 23 plant structures; EXPRESSED DURING: 13 growth stages; Has 118 Blast hits to 118 proteins in 41 species: /          |
| AT3G20010 | UUUUGUGAACUUGACCGGGGA  | 158   | 3.5 | Translation | [ Symbols:   SNF2 domain-containing protein / helicase domain-containing protein / zinc finger protein-related   chr3:6971352-6976595 FORWARD LENGTH=3399                                                                                               |
| AT3G20020 | UCUAUAGCCAAUGUAUCUACU  | 106   | 4   | Cleavage    | [ Symbols: ATRPM76, PRMT6   protein arginine methyltransferase 6   chr3:6983705-6988099 REVERSE LENGTH=1746                                                                                                                                             |
| AT3G20110 | UUGGACGUCUACUACUAGAUGA | 437   | 4   | Translation | [ Symbols: CYP705A20   cytochrome P450, family 705, subfamily A, polypeptide 20   chr3:7021332-7023279 FORWARD LENGTH=1862                                                                                                                              |
| AT3G20155 | UAUGAGCAUCUAGCCCAACU   | 142   | 3   | Cleavage    | [ Symbols:   unknown protein; Has 36 Blast hits to 36 proteins in 5 species: Archae - 0; Bacteria - 0; Metazoa - 0; Fungi - 0; Plants - 36; Viruses - 0; Other Eukaryotes - 0 [source: NCBI BLink].   chr3:7037135-7038375 FORWARD LENGTH=882           |
| AT3G20170 | UCUGAACUCUAGGACCCAAAC  | 493   | 3   | Cleavage    | [ Symbols:   ARM repeat superfamily protein   chr3:7041727-7043341 FORWARD LENGTH=1615                                                                                                                                                                  |
| AT3G20250 | UUGGCGUGGGAGCAUAGCGCA  | 299   | 3.5 | Cleavage    | [ Symbols: APUM5, PUM5   pumilio 5   chr3:7058902-7063240 REVERSE LENGTH=3213                                                                                                                                                                           |
| AT3G20260 | UCGACAAGAGCUGAACGUCU   | 423   | 3.5 | Cleavage    | [ Symbols:   Protein of unknown function [DUF1666]   chr3:7064054-7066503 REVERSE LENGTH=2202                                                                                                                                                           |
| AT3G20300 | UUGCGGAUGGUAUAGGACUAGG | 101   | 3.5 | Cleavage    | [ Symbols:   Protein of unknown function [DUF3537]   chr3:7079617-7081921 REVERSE LENGTH=1686                                                                                                                                                           |
| AT3G20310 | UUUGGUUCUGAGUCCCCGCCU  | 669   | 4   | Cleavage    | [ Symbols: ATERF-7, ATERF7, ERF7   ethylene response factor 7   chr3:7084806-7086805 REVERSE LENGTH=2000                                                                                                                                                |
| AT3G20350 | UCUGGGUAUGGGAUUCUUAUC  | 123   | 3   | Cleavage    | [ Symbols:   unknown protein; INVOLVED IN: biological_process unknown; LOCATED IN: plasma membrane; EXPRESSED IN: cotyledon; BEST Arabidopsis thaliana protein match is: unknown protein (TAIR:AT1G50660.1); Has 15095 Blast hits to 11:                |
| AT3G20440 | UACAUAUUCAGGACUCCUCU   | 156   | 3.5 | Translation | [ Symbols: EMB2729, BE1   Alpha amylase family protein   chr3:7123197-7130436 REVERSE LENGTH=3088                                                                                                                                                       |
| AT3G20500 | UUUAGAGAUCCUGGUUAUCUG  | 387   | 5   | Cleavage    | [ Symbols: ATPAP18, PAP18   purple acid phosphatase 18   chr3:7157906-7160417 FORWARD LENGTH=1507                                                                                                                                                       |
| AT3G20550 | UGUGGUGUACCUUCACUCU    | 112   | 4.5 | Cleavage    | [ Symbols: DDL   SMAD/FHA domain-containing protein   chr3:7174464-7177942 REVERSE LENGTH=1281                                                                                                                                                          |
| AT3G20580 | UAUGGCGUGGGAGCAUAGCGA  | 299   | 4   | Cleavage    | [ Symbols: COB110   COBRA-like protein 10 precursor   chr3:7187856-7190562 REVERSE LENGTH=2372                                                                                                                                                          |
| AT3G20680 | UGAAGGACAAGCUCAGCUGCU  | 1483  | 4   | Cleavage    | [ Symbols:   Domain of unknown function [DUF1995]   chr3:7230068-7231194 REVERSE LENGTH=1127                                                                                                                                                            |
| AT3G20865 | UUCUGAAGGACAAAGUACAGU  | 351   | 4   | Cleavage    | [ Symbols: AGP40   arabinogalactan protein 40   chr3:7308504-7308962 REVERSE LENGTH=459                                                                                                                                                                 |
| AT3G20890 | UUCUGAAGGACAAAGUACAGU  | 351   | 2.5 | Translation | [ Symbols:   RNA-binding (RRM/RBD/RNP motifs) family protein   chr3:7319848-7321054 FORWARD LENGTH=970                                                                                                                                                  |
| AT3G20898 | AUGGUAUUAGUACAUUGCGGCU | 196   | 3   | Translation | [ Symbols:   unknown_function unknown; FUNCTIONS IN: molecular_function unknown; INVOLVED IN: biological_process unknown; LOCATED IN: cellular_component unknown; BEST Arabidopsis thaliana protein match is: unknown protein (TAIR:AT1G5135            |
| AT3G21060 | UAAGCAUUUUGAUUACCGGGA  | 285   | 2.5 | Cleavage    | [ Symbols:   Transducin/WD40 repeat-like superfamily protein   chr3:7377734-7380213 FORWARD LENGTH=2303                                                                                                                                                 |
| AT3G21240 | UACGAGCAUCUAGCCCAACU   | 307   | 5   | Cleavage    | [ Symbols: ACL2, AT4CL2   4-coumarate:CoA ligase 2   chr3:7454269-7457379 REVERSE LENGTH=1964                                                                                                                                                           |
| AT3G21540 | UAGUGACCCGAGUAGUACACC  | 461   | 4.5 | Cleavage    | [ Symbols:   transducin family protein /WD-40 repeat family protein   chr3:7585596-7590856 REVERSE LENGTH=3022                                                                                                                                          |
| AT3G21690 | UCUUGGCAUGGAUUUGAACU   | 154   | 3.5 | Cleavage    | [ Symbols:   MATE efflux family protein   chr3:7638663-7642205 FORWARD LENGTH=1952                                                                                                                                                                      |
| AT3G22020 | UCUGGAGUACUUCUCCUACAG  | 209   | 3.5 | Cleavage    | [ Symbols:   Receptor-like protein kinase-related family protein   chr3:7756577-7757491 FORWARD LENGTH=624                                                                                                                                              |
| AT3G22050 | UGAAGGAUUUGGGUUAACCA   | 474   | 4   | Cleavage    | [ Symbols:   Domain of unknown function [DUF26]   chr3:7764131-7765143 FORWARD LENGTH=777                                                                                                                                                               |
| AT3G22053 | UCUGGGUAUGGGAUUCUUAUC  | 123   | 4   | Cleavage    | [ Symbols:   FUNCTIONS IN: molecular_function unknown; INVOLVED IN: biological_process unknown; LOCATED IN: cellular_component unknown; BEST Arabidopsis thaliana protein match is: Receptor protein kinase-related (TAIR:AT3G22030.1)                  |
| AT3G22090 | UUUGAAGGACAAAGUACAGU   | 351   | 4   | Cleavage    | [ Symbols:   unknown protein; BEST Arabidopsis thaliana protein match is: unknown protein (TAIR:AT1G71470.2); Has 12 Blast hits to 12 proteins in 2 species: Archae - 0; Bacteria - 0; Metazoa - 0; Fungi - 0; Plants - 12; Viruses - 0; Other Eukaryot |
| AT3G22170 | UUUAGAGAUCCCGUUAACU    | 387   | 3.5 | Cleavage    | [ Symbols: HYH3   far-red elongated hypocotyls 3   chr3:7822018-7825884 REVERSE LENGTH=2973                                                                                                                                                             |
| AT3G22220 | CUUUGCAUCUAGGAUUCUUUC  | 119   | 2.5 | Cleavage    | [ Symbols:   hAT transposon superfamily   chr3:7839555-7842781 REVERSE LENGTH=2635                                                                                                                                                                      |
| AT3G22380 | UAGGCGUGAGAUUGUUAACU   | 875   | 4   | Cleavage    | [ Symbols: TIC1   time for coffee   chr3:7912905-7919484 FORWARD LENGTH=5534                                                                                                                                                                            |
| AT3G22415 | AUUGACGUCGAGUAUGAGCCU  | 2734  | 4.5 | Cleavage    | [ Symbols:   unknown protein; Has 35333 Blast hits to 34131 proteins in 2444 species: Archae - 798; Bacteria - 22429; Metazoa - 974; Fungi - 991; Plants - 531; Viruses - 0; Other Eukaryotes - 9610 [source: NCBI BLink].   chr3:7941014-7941564 FC    |
| AT3G22425 | UGAGAGACUCCACCGGACCAU  | 230   | 5   | Cleavage    | [ Symbols: IGPD   imidazoleglycerol-phosphate dehydratase   chr3:7951055-7953223 FORWARD LENGTH=1238                                                                                                                                                    |
| AT3G22640 | UACAUAUUCAGGACUCCUCU   | 156   | 3   | Cleavage    | [ Symbols: PAP85   cupin family protein   chr3:8011724-8013902 REVERSE LENGTH=1658                                                                                                                                                                      |
| AT3G22670 | UACGUCACUGCGGAUUUCUGGA | 271   | 4.5 | Translation | [ Symbols:   Pentatricopeptide repeat (PPR) superfamily protein   chr3:8017771-8019459 REVERSE LENGTH=1689                                                                                                                                              |
| AT3G22690 | UACGUCACUUGUUCUAGGAG   | 223   | 4.5 | Cleavage    | [ Symbols:   CONTAINS InterPro DOMAIN/s: Protein of unknown function DUF1685 [InterPro:IPR012881], Pentatricopeptide repeat [InterPro:IPR002885]; BEST Arabidopsis thaliana protein match is: Tetratricopeptide repeat (TPR)-like superfamil            |
| AT3G22760 | UUGAGACCAUUCUCCGUCU    | 170   | 5   | Cleavage    | [ Symbols: SOL1   Tesmin/TSO1-like CXC domain-containing protein   chr3:8044455-8047530 FORWARD LENGTH=2146                                                                                                                                             |
| AT3G22860 | UCUAGGCCAAAUAUUGGGAACU | 163   | 3.5 | Cleavage    | [ Symbols:   TEF3C2, ATEIF3C-2, ETEF3C-2, ATEIF3C2   eukaryotic translation initiation factor 3 subunit C2   chr3:8090654-8093428 REVERSE LENGTH=2418                                                                                                   |
| AT3G22990 | UUGGGAAGCAUUAUGACACGAG | 515   | 3   | Translation | [ Symbols: LFR   ARM repeat superfamily protein   chr3:8163950-8166345 FORWARD LENGTH=1648                                                                                                                                                              |
| AT3G23050 | CAUCAAGAACCGGUAUCAGC   | 125   | 4.5 | Cleavage    | [ Symbols: IAAT7, AXR2   indole-3-acetic acid 7   chr3:8194679-8197153 FORWARD LENGTH=1258                                                                                                                                                              |
| AT3G23120 | UAGAUAUUAUUGUCUUGGCCA  | 194   | 4.5 | Cleavage    | [ Symbols: ATRLP38, RLP38   receptor like protein 38   chr3:8272222-8272976 REVERSE LENGTH=2355                                                                                                                                                         |
| AT3G23160 | UGGCGCUAACUUGCAAGGUG   | 10625 | 4.5 | Cleavage    | [ Symbols:   Protein of unknown function [DUF668]   chr3:8259855-8262028 REVERSE LENGTH=2174                                                                                                                                                            |
| AT3G23410 | UCUAGUACACAUUUUUGGGAC  | 427   | 3   | Cleavage    | [ Symbols: ATFAO3, FAO3   fatty alcohol oxidase 3   chr3:8382805-8386148 FORWARD LENGTH=2420                                                                                                                                                            |
| AT3G23450 | UGAGAACAUUGACUUCAGACU  | 158   | 3   | Cleavage    | [ Symbols:   unknown protein; FUNCTIONS IN: molecular_function unknown; INVOLVED IN: biological_process unknown; LOCATED IN: endomembrane system; EXPRESSED IN: 14 plant structures; EXPRESSED DURING: 8 growth stages; Has 69454:                      |
| AT3G23560 | UCUUGGCAUGGAUUUGAACU   | 154   | 3.5 | Translation | [ Symbols: ALF5   MATE efflux family protein   chr3:8454116-8456681 REVERSE LENGTH=1772                                                                                                                                                                 |
| AT3G23590 | UGCAUAUCUUGGGAUUAUACU  | 413   | 4.5 | Cleavage    | [ Symbols: RFR1, MED33A   REF4-related 1   chr3:8467449-8473627 FORWARD LENGTH=4277                                                                                                                                                                     |
| AT3G23660 | UGUGGUGUACCUUCACUCU    | 112   | 3.5 | Cleavage    | [ Symbols:   Sec23/Sec24 protein transport family protein   chr3:8513457-8517790 REVERSE LENGTH=2646                                                                                                                                                    |
| AT3G23860 | UUGGAGAACUCCUGACCCGA   | 1272  | 4.5 | Cleavage    | [ Symbols:   GTP-binding protein-related   chr3:8616953-8617645 REVERSE LENGTH=693                                                                                                                                                                      |
| AT3G23980 | UGGAGAUAGAUUAUUGCGG    | 126   | 4   | Cleavage    | [ Symbols: BLI, KOS1   BUSTER   chr3:8662433-8667752 REVERSE LENGTH=2842                                                                                                                                                                                |
| AT3G23990 | UCUAGUACAUUUUUGGGAC    | 427   | 2   | Cleavage    | [ Symbols: HSP60, HSP60-3B   heat shock protein 60   chr3:8668918-8672578 FORWARD LENGTH=2129                                                                                                                                                           |
| AT3G24010 | UUUGUGACACUAGGUACUCCU  | 119   | 3.5 | Cleavage    | [ Symbols: INGL, ATING1   RING/YFVE/PHD zinc finger superfamily protein   chr3:8675956-8678220 REVERSE LENGTH=903                                                                                                                                       |
| AT3G24120 | UGACGUCAGUUAUGAGCCUGA  | 416   | 3.5 | Translation | [ Symbols:   Homeodomain-like superfamily protein   chr3:8705636-8708315 REVERSE LENGTH=1353                                                                                                                                                            |
| AT3G24220 | UCUUGGCAUGGAUUUGAACU   | 154   | 4   | Cleavage    | [ Symbols: NCE6, ATNGD6   nine-cis-epoxycarotenoid dioxygenase 6   chr3:8761434-8763172 FORWARD LENGTH=1739                                                                                                                                             |
| AT3G24255 | UAUUAUUCGAGUAUUGUUCUG  | 314   | 4   | Translation | [ Symbols:   RNA-directed DNA polymerase (reverse transcriptase)-related family protein   chr3:8788854-8793368 FORWARD LENGTH=2777                                                                                                                      |
| AT3G24320 | UCCGCUAGAUAAUUAACAACUG | 281   | 4.5 | Cleavage    | [ Symbols: MSH1, CHM1, ATMSH1, CHM   MULT protein homolog 1   chr3:8822979-8829694 REVERSE LENGTH=3730                                                                                                                                                  |
| AT3G24360 | UCCCAACCCAUUAUUAACGG   | 236   | 5   | Cleavage    | [ Symbols:   ATP-dependent caseinolytic (Clp) protease/crotonase family protein   chr3:8839728-8842831 REVERSE LENGTH=1393                                                                                                                              |
| AT3G24490 | UCUAGUUGCCGUUCUUCUAGAC | 300   | 3.5 | Translation | [ Symbols:   Alcohol dehydrogenase transcription factor Myb/SANT-like family protein   chr3:8910770-8912196 FORWARD LENGTH=1427                                                                                                                         |
| AT3G24550 | CUUGGCAUGCAUUUAUGAACU  | 1059  | 3.5 | Cleavage    | [ Symbols: ATERPK1, PERK1   proline extensin-like receptor kinase 1   chr3:8960258-8963568 FORWARD LENGTH=2377                                                                                                                                          |
| AT3G24630 | UGACGGACAGGAUUAUUAACU  | 1505  | 5   | Cleavage    | [ Symbols:   unknown protein; Has 5348 Blast hits to 3182 proteins in 353 species: Archae - 0; Bacteria - 481; Metazoa - 1959; Fungi - 405; Plants - 180; Viruses - 10; Other Eukaryotes - 2313 [source: NCBI BLink].   chr3:8988055-8990873 FORWAI     |
| AT3G24670 | AUUGAUUCUGGACCAAGGGC   | 128   | 3.5 | Cleavage    | [ Symbols:   Pectin lyase-like superfamily protein   chr3:9005939-9008801 REVERSE LENGTH=1589                                                                                                                                                           |
| AT3G24820 | UGUCCCAACUUAUCUUAACU   | 279   | 3.5 | Cleavage    | [ Symbols:   BSD domain-containing protein   chr3:9062365-9064378 REVERSE LENGTH=832                                                                                                                                                                    |
| AT3G24890 | UGACGGACAGGAUUAAGUUGU  | 1505  | 4   | Cleavage    | [ Symbols: VAMP728   vesicle-associated membrane protein 728   chr3:9097514-9098945 FORWARD LENGTH=663                                                                                                                                                  |
| AT3G25060 | UACUUCACGGGUUCUGUAGCC  | 826   | 4   | Translation | [ Symbols:   Tetratricopeptide repeat (TPR)-like superfamily protein   chr3:9128516-9130321 FORWARD LENGTH=1806                                                                                                                                         |
| AT3G25110 | UUUGAACAGCCUUGAUGAUGU  | 102   | 3.5 | Translation | [ Symbols: ATFaTa, FaTa   fatA acyl-ACP thioesterase   chr3:9146271-9148486 REVERSE LENGTH=1620                                                                                                                                                         |
| AT3G25520 | UGUGGAUACAAGAGCUGGGCU  | 215   | 3   | Cleavage    | [ Symbols: ATLS, PGY3, OLS, RPLSA   ribosomal protein L5   chr3:9269293-9271390 REVERSE LENGTH=1249                                                                                                                                                     |
| AT3G25620 | UAUGACCGGAGGAUGAGGACU  | 330   | 4   | Cleavage    | [ Symbols:   ABC-2 type transporter family protein   chr3:9316074-9319571 REVERSE LENGTH=2688                                                                                                                                                           |
| AT3G25640 | UCUAGUACAUUUUUGGGAC    | 427   | 5   | Translation | [ Symbols:   Protein of unknown function, DUF617   chr3:9333719-9334804 FORWARD LENGTH=1086                                                                                                                                                             |
| AT3G25670 | UUUAUACGAACUUCUUGGCC   | 310   | 4.5 | Cleavage    | [ Symbols:   Leucine-rich repeat (LRR) family protein   chr3:9344532-9346301 REVERSE LENGTH=1428                                                                                                                                                        |
| AT3G25860 | UGCGGAUCCUGCUAGAUUGGCU | 135   | 3.5 | Cleavage    | [ Symbols: LTA2, PLE2   2-oxoacid dehydrogenases acyltransferase family protein   chr3:9460560-9462787 FORWARD LENGTH=1717                                                                                                                              |
| AT3G26040 | UAGCAAGCUUAGGCCACAU    | 373   | 5   | Translation | [ Symbols:   HXXXD-type acyl-transferase family protein   chr3:9519741-9521070 FORWARD LENGTH=1330                                                                                                                                                      |
| AT3G26060 | UCGAGUACACAGAUGGGGUG   | 179   | 3.5 | Cleavage    | [ Symbols: ATRPX Q   Thioedoxin superfamily protein   chr3:9524733-9526374 FORWARD LENGTH=976                                                                                                                                                           |
| AT3G26085 | UUUGGGUUGGGUUAACUUCU   | 225   | 4   | Cleavage    | [ Symbols:   CAXX amino terminal protease family protein   chr3:9530595-9532417 FORWARD LENGTH=983                                                                                                                                                      |

|           |                        |      |                 |                                                                                                                                                                                                                                                                                                                                                                                            |
|-----------|------------------------|------|-----------------|--------------------------------------------------------------------------------------------------------------------------------------------------------------------------------------------------------------------------------------------------------------------------------------------------------------------------------------------------------------------------------------------|
| AT3G26115 | UUGGGCCUCAACUCUGCAAGGU | 955  | 4 Translation   | [ Symbols:   Pyridoxal-5'-phosphate-dependent enzyme family protein   chr3:9542278-9544348 FORWARD LENGTH=1409                                                                                                                                                                                                                                                                             |
| AT3G26125 | CAACGCUUCUGUAUGCAUCUAG | 133  | 3.5 Cleavage    | [ Symbols: CYP86C2   cytochrome P450, family 86, subfamily C, polypeptide 2   chr3:9551812-9553437 FORWARD LENGTH=1626                                                                                                                                                                                                                                                                     |
| AT3G26160 | UAUAGAGCAACUAGCUACUUG  | 123  | 4 Cleavage      | [ Symbols: CYP71B17   cytochrome P450, family 71, subfamily B, polypeptide 17   chr3:9568280-9569886 REVERSE LENGTH=1524                                                                                                                                                                                                                                                                   |
| AT3G26520 | UUAGAAUUUAUUGUUGUGGCG  | 138  | 3.5 Translation | [ Symbols: TIP2, SITP, GAMMA-TIP2, TIP1,2   tonoplast intrinsic protein 2   chr3:9722443-9723815 REVERSE LENGTH=1201                                                                                                                                                                                                                                                                       |
| AT3G26540 | UCAGUAGAAUUGCAUCAUAC   | 104  | 3 Translation   | [ Symbols:   Tetraicopeptide repeat (TPR)-like superfamily protein   chr3:9744542-9746644 REVERSE LENGTH=2103                                                                                                                                                                                                                                                                              |
| AT3G26560 | UCCGCUAGAAUUAUUAACUUC  | 281  | 3.5 Translation | [ Symbols:   ATP-dependent RNA helicase, putative   chr3:9749904-9753772 REVERSE LENGTH=3778                                                                                                                                                                                                                                                                                               |
| AT3G26600 | UUUAAACACUUAAGUUCUGUG  | 1055 | 3 Translation   | [ Symbols: AR04   armadillo repeat only 4   chr3:9769744-9772035 FORWARD LENGTH=2292                                                                                                                                                                                                                                                                                                       |
| AT3G26740 | UCUAGUGCAUUUUUUGUGAC   | 421  | 2.5 Cleavage    | [ Symbols: CCL   CCR-like   chr3:9827801-9828680 FORWARD LENGTH=712                                                                                                                                                                                                                                                                                                                        |
| AT3G26770 | UAAGGAGUUGCAGCUUUAUGGA | 134  | 4.5 Cleavage    | [ Symbols:   NAD(P) binding Rossmann-fold superfamily protein   chr3:9845396-9847348 FORWARD LENGTH=1088                                                                                                                                                                                                                                                                                   |
| AT3G26910 | UAUCUUCUUGUAGCUUCUGUC  | 210  | 2.5 Translation | [ Symbols:   hydroxyproline-rich glycoprotein family protein   chr3:9915128-9918743 REVERSE LENGTH=2253                                                                                                                                                                                                                                                                                    |
| AT3G26950 | UGACGGAAAGCUACAGAGAUUG | 108  | 4 Cleavage      | [ Symbols:   unknown protein; Has 27 Blast hits to 27 proteins in 8 species: Archae - 0; Bacteria - 0; Metazoa - 0; Fungi - 0; Plants - 27; Viruses - 0; Other Eukaryotes - 0 (source: NCBI BLink).   chr3:9941138-9943480 REVERSE LENGTH=1780                                                                                                                                             |
| AT3G26990 | CUCAACAAGUUAUAGGCGUUG  | 110  | 5 Cleavage      | [ Symbols:   ENTH/VHS family protein   chr3:9948223-9952041 REVERSE LENGTH=1960                                                                                                                                                                                                                                                                                                            |
| AT3G27040 | UGUGUGUUGACUCUACACGUCU | 112  | 3 Cleavage      | [ Symbols:   Mepirin and TRAF (MATH) homology domain-containing protein   chr3:9974912-9977927 REVERSE LENGTH=1077                                                                                                                                                                                                                                                                         |
| AT3G27190 | UGAAUUCUGUUGAACUGGACC  | 197  | 4 Cleavage      | [ Symbols: UKL2   uridine kinase-like 2   chr3:10039234-10043066 REVERSE LENGTH=1871                                                                                                                                                                                                                                                                                                       |
| AT3G27200 | UAGAUAACAAGAAUCUUCUUC  | 107  | 3.5 Cleavage    | [ Symbols:   Cupredoxin superfamily protein   chr3:10043522-10044373 REVERSE LENGTH=774                                                                                                                                                                                                                                                                                                    |
| AT3G27250 | UGUCUUAACCGUAGCUGCGUUC | 150  | 4.5 Cleavage    | [ Symbols:   unknown protein; BEST Arabidopsis thaliana protein match is: unknown protein (TAIR:AT5G40800.1); Has 104 Blast hits to 104 proteins in 13 species: Archae - 0; Bacteria - 0; Metazoa - 0; Fungi - 0; Plants - 104; Viruses - 0; Other Euk                                                                                                                                     |
| AT3G27270 | UUACGAGACUCUAGCCCAAGC  | 3733 | 4.5 Cleavage    | [ Symbols:   TRAM, LAG1 and CLN8 (TLC) lipid-sensing domain containing protein   chr3:10073280-10074160 FORWARD LENGTH=881                                                                                                                                                                                                                                                                 |
| AT3G27340 | UGAGACACAAACGGGAGAUUC  | 244  | 3.5 Translation | [ Symbols:   FUNCTIONS IN: molecular_function unknown; INVOLVED IN: oxidation reduction; EXPRESSED IN: 23 plant structures; EXPRESSED DURING: 15 growth stages; CONTAINS InterPro DOMAIN/s: Gamma-butyrobetaine dioxygenase/Trimel                                                                                                                                                         |
| AT3G27570 | UCCCGGAUUGCUGAAGAAGUA  | 113  | 3.5 Cleavage    | [ Symbols:   Sucrase/ferredoxin-like family protein   chr3:10213996-10216736 REVERSE LENGTH=1475                                                                                                                                                                                                                                                                                           |
| AT3G27610 | UUUUGAACUUGGGAUACCCU   | 768  | 3.5 Translation | [ Symbols:   Nucleotidyl transferase superfamily protein   chr3:10225525-10228192 REVERSE LENGTH=1414                                                                                                                                                                                                                                                                                      |
| AT3G27670 | AAAGUCAAGAACCACCAACCU  | 201  | 4.5 Cleavage    | [ Symbols: RST1   ARM repeat superfamily protein   chr3:10245134-10253293 FORWARD LENGTH=5865                                                                                                                                                                                                                                                                                              |
| AT3G27720 | UCACUUCUGUGCAAGAUUACCC | 138  | 4.5 Cleavage    | [ Symbols: AR14, ATAR4   IIR domain containing protein   chr3:10271876-10273621 FORWARD LENGTH=1482                                                                                                                                                                                                                                                                                        |
| AT3G27730 | UGAAGGUAUUUGGUUAUACCA  | 474  | 3.5 Translation | [ Symbols: RCK, MERS   ATP binding-ATP-dependent helicase-DNA helicases   chr3:10273801-10280362 REVERSE LENGTH=3702                                                                                                                                                                                                                                                                       |
| AT3G27831 | UAUUUGUCUGAGUUAUGGCGU  | 517  | 4 Cleavage      | [ Symbols:   Gamma-thionin family protein   chr3:10319481-10320092 REVERSE LENGTH=234                                                                                                                                                                                                                                                                                                      |
| AT3G27835 | UAUUAGCUCUGAGUAUGAGCCU | 517  | 4 Cleavage      | [ Symbols:   Gamma-thionin family protein   chr3:10321741-10322306 REVERSE LENGTH=240                                                                                                                                                                                                                                                                                                      |
| AT3G27910 | UGUGGAUACAAGAGCUGGGCU  | 215  | 3.5 Cleavage    | [ Symbols:   Galactose oxidase/keich repeat superfamily protein   chr3:10357232-10358116 REVERSE LENGTH=885                                                                                                                                                                                                                                                                                |
| AT3G27970 | UAUCUUCUGUCUGUACGAACCU | 295  | 3 Cleavage      | [ Symbols:   Exonuclease family protein   chr3:10389609-10391544 FORWARD LENGTH=1074                                                                                                                                                                                                                                                                                                       |
| AT3G27990 | UGUGGAUACAAGAGCUGGGCU  | 215  | 4 Cleavage      | [ Symbols:   other RNA   chr3:10392675-10398175 REVERSE LENGTH=1527                                                                                                                                                                                                                                                                                                                        |
| AT3G28170 | UUCUUGUGAACUUGAACGGGGA | 158  | 3.5 Translation | [ Symbols:   unknown protein; Has 2 Blast hits to 1 proteins in 1 species: Archae - 0; Bacteria - 0; Metazoa - 0; Fungi - 0; Plants - 2; Viruses - 0; Other Eukaryotes - 0 (source: NCBI BLink).   chr3:10498361-10500360 FORWARD LENGTH=624                                                                                                                                               |
| AT3G28223 | UCUGUAUGCAUAUACUGGGAC  | 1212 | 4 Cleavage      | [ Symbols:   F-box family protein   chr3:10527477-10528961 REVERSE LENGTH=1408                                                                                                                                                                                                                                                                                                             |
| AT3G28640 | AAACACUUCUAGACUUGAUCCU | 123  | 3.5 Cleavage    | [ Symbols:   Tetraicopeptide repeat (TPR)-like superfamily protein   chr3:10731518-10733032 REVERSE LENGTH=1515                                                                                                                                                                                                                                                                            |
| AT3G28660 | AAACACUUCUAGACUUGAUCCU | 123  | 3.5 Cleavage    | [ Symbols:   Tetraicopeptide repeat (TPR)-like superfamily protein   chr3:10738715-10740930 REVERSE LENGTH=2142                                                                                                                                                                                                                                                                            |
| AT3G28710 | ACAAACUGUUGAACAAGCCU   | 1107 | 4.5 Cleavage    | [ Symbols:   ATPase, VO/AO complex, subunit C/D   chr3:10772903-10775727 REVERSE LENGTH=1430                                                                                                                                                                                                                                                                                               |
| AT3G28715 | ACAAACUGUUGAACAAGCCU   | 1107 | 4.5 Cleavage    | [ Symbols:   ATPase, VO/AO complex, subunit C/D   chr3:10777837-10780614 FORWARD LENGTH=1484                                                                                                                                                                                                                                                                                               |
| AT3G28860 | UCCCGGAUUGCUGAAGAAGUA  | 113  | 4 Cleavage      | [ Symbols:   ATMDR1, ATMDR11, PGP19, MDR11, MDR1, ATPGP19, ABCB19, ATABC19   ATP binding cassette subfamily B19   chr3:10870038-10877506 REVERSE LENGTH=4228                                                                                                                                                                                                                               |
| AT3G29255 | UGAAUAAAAACUGAACCAUCC  | 263  | 4 Translation   | [ Symbols:   catalytic;intramolecular transferases   chr3:11209586-11213909 FORWARD LENGTH=2121                                                                                                                                                                                                                                                                                            |
| AT3G29390 | UGCCACCAACUGCAUGAUCCU  | 174  | 5 Cleavage      | [ Symbols: RIK1   RS2-interacting KH protein   chr3:11289613-11294774 FORWARD LENGTH=2049                                                                                                                                                                                                                                                                                                  |
| AT3G29410 | UCCACCGACUGAUGACAAUUG  | 1524 | 4 Cleavage      | [ Symbols:   Terpenoid cyclases/Protein prenyltransferases superfamily protein   chr3:11302431-11305136 REVERSE LENGTH=2031                                                                                                                                                                                                                                                                |
| AT3G29630 | UAAACUAGACCAUUGCCUAGIA | 302  | 4 Cleavage      | [ Symbols:   UDP-  glycosyltransferase superfamily protein   chr3:11447028-11448609 REVERSE LENGTH=1582                                                                                                                                                                                                                                                                                    |
| AT3G29638 | UAUUGUUAUUUGGCGUUGAGC  | 116  | 4 Cleavage      | [ Symbols:   General transcription factor 2-related zinc finger protein   chr3:11473584-11475559 FORWARD LENGTH=1239                                                                                                                                                                                                                                                                       |
| AT3G29770 | UAUGUACCGAGUAUGACACC   | 461  | 4.5 Translation | [ Symbols:   ATMES11, MES11   methyl esterase 11   chr3:11648341-11650839 FORWARD LENGTH=1577                                                                                                                                                                                                                                                                                              |
| AT3G30120 | UUUUGUUCUUGCUGUAGUACCC | 153  | 3.5 Cleavage    | [ Symbols:   pseudogene, similar to CTV.22, blastp match of 29% identity and 4.9e-74 P-value to GP[24461867][gb]AANG62354.1 AF506028_23 AF506028 CTV.22 [Poncirus trifoliata]   chr3:11752005-11756485 REVERSE LENGTH=4481                                                                                                                                                                 |
| AT3G30222 | UCGGCUCAAACUUAACACGUU  | 129  | 4.5 Cleavage    | [ Symbols:   unknown protein; LOCATED IN: endomembrane system; Has 30201 Blast hits to 17322 proteins in 780 species: Archae - 12; Bacteria - 1396; Metazoa - 17338; Fungi - 3422; Plants - 5037; Viruses - 0; Other Eukaryotes - 2996 (source: NC                                                                                                                                         |
| AT3G30290 | CUCUUAUGUUCUUGUUAUGCGA | 102  | 4 Cleavage      | [ Symbols: CYP702A8   cytochrome P450, family 702, subfamily A, polypeptide 8   chr3:11917230-11919546 REVERSE LENGTH=1227                                                                                                                                                                                                                                                                 |
| AT3G30415 | UUCUAGAGGACCAAGCAGCUGU | 1012 | 4 Translation   | [ Symbols:   pseudogene, putative uroporphyrin III methylase, blastp match of 80% identity and 2.7e-49 P-value to GP[20161485][db]AB990408.1 AP003681 uroporphyrin-III C-methyltransferase-like protein [Oryza sativa (japonica cultivar-gr                                                                                                                                                |
| AT3G31350 | UUGUACAAGUAGCUGAUCCUAC | 4031 | 3.5 Translation | [ Symbols:   unknown protein; FUNCTIONS IN: molecular_function unknown; INVOLVED IN: biological_process unknown; LOCATED IN: cellular_component unknown; EXPRESSED IN: fruit; Has 2 Blast hits to 2 proteins in 1 species: Archae - 0; Bacteria - 0; Metazoa - 0; Fungi - 0; Plants - 2; Viruses - 0; Other Eukaryotes - 0 (source: NCBI BLink).   chr3:11958118-11958118 REVERSE LENGTH=1 |
| AT3G32896 | UAUGAGUUAUGCAUGCAAGAAU | 123  | 4 Cleavage      | [ Symbols:   unknown protein; FUNCTIONS IN: molecular_function unknown; INVOLVED IN: biological_process unknown; LOCATED IN: mitochondrion; Has 10 Blast hits to 10 proteins in 2 species: Archae - 0; Bacteria - 0; Metazoa - 0; Fungi - 0; Plants - 2; Viruses - 0; Other Eukaryotes - 0 (source: NCBI BLink).   chr3:12000000-12000000 REVERSE LENGTH=1                                 |
| AT3G32940 | UGUGGAUUAUGUAGUAGUCCU  | 111  | 4 Translation   | [ Symbols:   RNA-binding KH domain-containing protein   chr3:13490945-13493787 REVERSE LENGTH=2125                                                                                                                                                                                                                                                                                         |
| AT3G32990 | UCUAGUCCGAAUAUAGGCAAG  | 163  | 4 Cleavage      | [ Symbols:   pseudogene, ATP synthase C subunit, blastp match of 86% identity and 9.3e-27 P-value to SP[106286][ATPH_TOBAC ATP synthase C chain (EC 3.6.3.14) (Lipid-binding protein) (Subunit III). (Common tobacco) [Nicotiana tabacum]   ch                                                                                                                                             |
| AT3G42047 | UUUGAUAUCUAGGUAUACCUA  | 227  | 4 Translation   | [ Symbols:   unknown pseudogene   chr3:14227679-14228304 REVERSE LENGTH=626                                                                                                                                                                                                                                                                                                                |
| AT3G42310 | UUGAUCUAGUAGCUGACUCU   | 4031 | 5 Cleavage      | [ Symbols:   unknown protein; Has 66 Blast hits to 66 proteins in 13 species: Archae - 0; Bacteria - 0; Metazoa - 12; Fungi - 0; Plants - 18; Viruses - 31; Other Eukaryotes - 5 (source: NCBI BLink).   chr3:14459818-14461497 FORWARD LENGTH=246                                                                                                                                         |
| AT3G42550 | UUGGACGCCUUAUGUAUGAGA  | 679  | 4.5 Translation | [ Symbols:   Eukaryotic aspartyl protease family protein   chr3:14665728-14669135 REVERSE LENGTH=1293                                                                                                                                                                                                                                                                                      |
| AT3G42670 | CUGAGGACGCUAGCAGCAUUA  | 113  | 3.5 Cleavage    | [ Symbols: CHR38, CLSY   chromatin remodeling 38   chr3:14755798-14760085 REVERSE LENGTH=3879                                                                                                                                                                                                                                                                                              |
| AT3G43120 | UCUAGUCCGAAAUUUGCGGAA  | 236  | 4.5 Cleavage    | [ Symbols:   SAUR-like auxin-responsive protein family   chr3:15094083-15095512 FORWARD LENGTH=849                                                                                                                                                                                                                                                                                         |
| AT3G43210 | UUAAGUUAUGUAGUUAUAGC   | 236  | 4 Cleavage      | [ Symbols: TES, ATNACK2, NACK2   ATP binding microtubule motor family protein   chr3:15190934-15196168 FORWARD LENGTH=3193                                                                                                                                                                                                                                                                 |
| AT3G43290 | UUAGGAUUAUCCUGUUAUCUG  | 106  | 4 Cleavage      | [ Symbols:   unknown protein; FUNCTIONS IN: molecular_function unknown; INVOLVED IN: in 8 processes; LOCATED IN: cellular_component unknown; EXPRESSED IN: leaf; EXPRESSED DURING: LP 10 ten leaves visible; Has 1 Blast hits to 1 protein                                                                                                                                                 |
| AT3G43580 | UGAGUAAGAUUUGCAUUAUAC  | 114  | 4 Cleavage      | [ Symbols:   Beta-galactosidase related protein   chr3:15502143-15503606 FORWARD LENGTH=1464                                                                                                                                                                                                                                                                                               |
| AT3G43660 | AUUAUCUCUGGAUCAAACCCU  | 222  | 3 Translation   | [ Symbols:   Vacuolar iron transporter (VIT) family protein   chr3:15565224-15566047 FORWARD LENGTH=824                                                                                                                                                                                                                                                                                    |
| AT3G44090 | UUGGGAUCUGGAUAGGACUAGG | 101  | 3 Translation   | [ Symbols:   F-box family protein   chr3:15839123-15840759 FORWARD LENGTH=1350                                                                                                                                                                                                                                                                                                             |
| AT3G44160 | UCCGUCACAAACUAGCACGUU  | 129  | 4.5 Cleavage    | [ Symbols:   Outer membrane OMP85 family protein   chr3:15888902-15891988 REVERSE LENGTH=1586                                                                                                                                                                                                                                                                                              |
| AT3G44170 | UCUUGUUGCAUUAUAGUACUC  | 189  | 4.5 Cleavage    | [ Symbols:   FUNCTIONS IN: molecular_function unknown; INVOLVED IN: biological_process unknown; LOCATED IN: endomembrane system; CONTAINS InterPro DOMAIN/s: Plant self-incompatibility S1 (InterPro:IPR010264); BEST Arabidopsis th                                                                                                                                                       |
| AT3G44290 | UGAGUAAGAUUUGCAUCAUAC  | 114  | 3.5 Translation | [ Symbols:   anac060, NAC060   NAC domain containing protein 60   chr3:15972909-15975183 REVERSE LENGTH=1172                                                                                                                                                                                                                                                                               |
| AT3G44460 | UUUCUUCCUGUGUGUGCGCC   | 205  | 3 Cleavage      | [ Symbols:   DBPF2, AtbZIP67   Basic-leucine zipper (bZIP) transcription factor family protein   chr3:16079976-16081906 REVERSE LENGTH=1232                                                                                                                                                                                                                                                |
| AT3G44530 | AUGGAUUUAGAUACAUUGCGUC | 196  | 3.5 Translation | [ Symbols:   HIRA   homolog of histone chaperone HIRA   chr3:16115588-16121518 FORWARD LENGTH=3442                                                                                                                                                                                                                                                                                         |
| AT3G44713 | UGCGGACCAAGAUAGGCGUUC  | 259  | 4.5 Cleavage    | [ Symbols:   unknown protein; BEST Arabidopsis thaliana protein match is: unknown protein (TAIR:AT2G14800.1); Has 69 Blast hits to 64 proteins in 24 species: Archae - 2; Bacteria - 10; Metazoa - 4; Fungi - 4; Plants - 36; Viruses - 1; Other Eukary                                                                                                                                    |
| AT3G44716 | UAACCGUACUGCGCUUACAAG  | 3223 | 4 Translation   | [ Symbols:   unknown protein; FUNCTIONS IN: molecular_function unknown; INVOLVED IN: biological_process unknown; LOCATED IN: endomembrane system; Has 13 Blast hits to 13 proteins in 6 species: Archae - 0; Bacteria - 0; Metazoa - 0; Fur                                                                                                                                                |
| AT3G44800 | UAUGUUCUUGUUGAUUACCCU  | 344  | 3.5 Translation | [ Symbols:   Mepirin and TRAF (MATH) homology domain-containing protein   chr3:16343333-16346027 FORWARD LENGTH=1695                                                                                                                                                                                                                                                                       |
| AT3G44805 | UAUGUUCUUGUUGAUUACCCU  | 344  | 4 Translation   | [ Symbols:   TRAF-like superfamily protein   chr3:16350395-16351437 FORWARD LENGTH=747                                                                                                                                                                                                                                                                                                     |
| AT3G44890 | ACAAAACUGUUGAACAAGCCU  | 1107 | 3 Cleavage      | [ Symbols: RPL9   ribosomal protein L9   chr3:16386434-16388466 FORWARD LENGTH=920                                                                                                                                                                                                                                                                                                         |
| AT3G44900 | UGCAGCUCUUGUUGUUGCGAG  | 378  | 4.5 Cleavage    | [ Symbols:   ATCH4X, CHX4   cation/H <sup>+</sup> exchanger 4   chr3:16388724-16391360 FORWARD LENGTH=2454                                                                                                                                                                                                                                                                                 |
| AT3G44960 | UUAGGAUUAUGCAUUGUUGCG  | 138  | 3.5 Translation | [ Symbols:   unknown protein; Has 34 Blast hits to 34 proteins in 10 species: Archae - 0; Bacteria - 0; Metazoa - 3; Fungi - 0; Plants - 31; Viruses - 0; Other Eukaryotes - 0 (source: NCBI BLink).   chr3:16427795-16429151 FORWARD LENGTH=624                                                                                                                                           |
| AT3G44990 | UAUGUUCUGCGCCUACAAG    | 192  | 4.5 Cleavage    | [ Symbols:   XTR8, ATXTR8, XTH31   xyloglucan endo-transglycosylase-related 8   chr3:16446975-16448764 REVERSE LENGTH=1273                                                                                                                                                                                                                                                                 |
| AT3G45040 | AAACAGGACAAUUAUCUGGCC  | 986  | 4.5 Translation | [ Symbols:   phosphatidate cytidyltransferase family protein   chr3:16472662-16475753 REVERSE LENGTH=1900                                                                                                                                                                                                                                                                                  |
| AT3G45280 | UAUGGAUGAUUCGCAUUGGCC  | 152  | 4.5 Cleavage    | [ Symbols:   SPY22, ATSPY27   syntaxin of plants 22   chr3:16611413-16613340 REVERSE LENGTH=872                                                                                                                                                                                                                                                                                            |
| AT3G45310 | UACAACUCUGUAUGAACAUGU  | 143  | 3.5 Cleavage    | [ Symbols:   Cysteine proteinases superfamily protein   chr3:16628384-16630521 REVERSE LENGTH=1442                                                                                                                                                                                                                                                                                         |
| AT3G45320 | UCCCGGAUUGCUGAAGGACUAG | 113  | 4 Translation   | [ Symbols:   unknown protein; BEST Arabidopsis thaliana protein match is: unknown protein (TAIR:AT5G60330.1); Has 7 Blast hits to 7 proteins in 2 species: Archae - 0; Bacteria - 0; Metazoa - 0; Fungi - 0; Plants - 7; Viruses - 0; Other Eukaryotes -                                                                                                                                   |
| AT3G45410 | UCUGUACCGCUGAUUUCUUCU  | 275  | 3.5 Translation | [ Symbols:   Concanavalin A-like lectin protein kinase family protein   chr3:16653899-16656013 REVERSE LENGTH=2115                                                                                                                                                                                                                                                                         |
| AT3G45420 | UCUGUACCGCUGAUUUCUUCU  | 275  | 3 Translation   | [ Symbols:   Concanavalin A-like lectin protein kinase family protein   chr3:16657263-16659266 REVERSE LENGTH=2004                                                                                                                                                                                                                                                                         |
| AT3G45430 | CGGAUUCUGAUUGCUGUUGUG  | 186  | 3.5 Translation | [ Symbols:   Concanavalin A-like lectin protein kinase family protein   chr3:16660759-16662783 REVERSE LENGTH=2025                                                                                                                                                                                                                                                                         |
| AT3G45620 | UACGCGACCGGUGUGUGCGCC  | 119  | 4.5 Translation | [ Symbols:   Transducin/WD40 repeat-like superfamily protein   chr3:16745882-16748156 FORWARD LENGTH=1747                                                                                                                                                                                                                                                                                  |
| AT3G45850 | UUUGGCGCUAACUCUGCAAG   | 3787 | 4.5 Cleavage    | [ Symbols:   P-loop containing nucleoside triphosphate hydrolases superfamily protein   chr3:16855612-16861527 REVERSE LENGTH=3528                                                                                                                                                                                                                                                         |
| AT3G46160 | UGCGCAAGGAGUAUACGACCU  | 163  | 4 Cleavage      | [ Symbols:   Protein kinase superfamily protein   chr3:16950955-16952136 FORWARD LENGTH=1182                                                                                                                                                                                                                                                                                               |
| AT3G46290 | UCUGUAGCAUUAUCUGGGAC   | 1212 | 3.5 Cleavage    | [ Symbols:   HERK1   hercules receptor kinase 1   chr3:17012728-17015885 FORWARD LENGTH=3032                                                                                                                                                                                                                                                                                               |
| AT3G46330 | UUUGGUGUUGGGUUAUACUGCU | 225  | 2 Translation   | [ Symbols:   MEE39   Leucine-rich repeat protein kinase family protein   chr3:17020747-17025011 REVERSE LENGTH=2904                                                                                                                                                                                                                                                                        |
| AT3G46350 | UUUCUAGACUGGAUAGGACU   | 265  | 3.5 Cleavage    | [ Symbols:   Leucine-rich repeat protein kinase family protein   chr3:17036427-17041680 FORWARD LENGTH=2616                                                                                                                                                                                                                                                                                |
| AT3G46360 | UGACACGCAUUCUGAUUGACAU | 377  | 3.5 Cleavage    | [ Symbols:   unknown protein; BEST Arabidopsis thaliana protein match is: unknown protein (TAIR:AT2G44755.1); Has 4 Blast hits to 4 proteins in 2 species: Archae - 0; Bacteria - 0; Metazoa - 0; Fungi - 0; Plants - 4; Viruses - 0; Other Eukaryotes -                                                                                                                                   |
| AT3G46430 | UAGCAGCCGAGGAUGAUGACAU | 320  | 3.5 Cleavage    | [ Symbols:   Leucine-rich repeat protein kinase family protein   chr3:17082108-17086334 FORWARD LENGTH=2517                                                                                                                                                                                                                                                                                |
| AT3G46460 | UUUCUGACGGACAAAGUAAGU  | 480  | 3 Cleavage      | [ Symbols:   UBC13   ubiquitin-conjugating enzyme 13   chr3:17095878-17097452 REVERSE LENGTH=880                                                                                                                                                                                                                                                                                           |
| AT3G46510 | UCGACGACCUACGUCACUGCG  | 100  | 5 Cleavage      | [ Symbols:   PUB13, ATPUB13   plant U-box 13   chr3:17123739-17126691 REVERSE LENGTH=2502                                                                                                                                                                                                                                                                                                  |

|           |                         |       |     |             |                                                                                                                                                                                                                                                  |
|-----------|-------------------------|-------|-----|-------------|--------------------------------------------------------------------------------------------------------------------------------------------------------------------------------------------------------------------------------------------------|
| AT3G46650 | UGAGAACAUIUGACUUCAGACCU | 158   | 4   | Cleavage    | Symbols:   UDP-Glycosyltransferase superfamily protein   chr3:17185453-17187812 REVERSE LENGTH=1416                                                                                                                                              |
| AT3G46670 | CGAGAGAUUACAGGGACUGUC   | 3198  | 4   | Cleavage    | Symbols: UGT76E11   UDP-glucosyl transferase 76E11   chr3:17192589-17194397 REVERSE LENGTH=1732                                                                                                                                                  |
| AT3G46820 | UAAACAAGAACUUCUUUUUU    | 235   | 3   | Cleavage    | Symbols: TOPP5   type one serine/threonine protein phosphatase 5   chr3:17241781-17244277 REVERSE LENGTH=1583                                                                                                                                    |
| AT3G46900 | UAAAACUUGAACUUGCUAGA    | 302   | 4   | Cleavage    | Symbols: COPT2   copper transporter 2   chr3:17268875-17269510 FORWARD LENGTH=636                                                                                                                                                                |
| AT3G47030 | CUGGGGUA CAGAACAUUGCGU  | 197   | 3   | Translation | Symbols: F-box and associated interaction domains-containing protein   chr3:17322119-17323545 FORWARD LENGTH=1427                                                                                                                                |
| AT3G47060 | UUUGGGGCUAACUUCUGCAAG   | 3787  | 3   | Translation | Symbols: ftsH7   FtsH protease 7   chr3:17332985-17336966 FORWARD LENGTH=2776                                                                                                                                                                    |
| AT3G47110 | UUGGAGUAACAAGAUUGGGGU   | 111   | 4.5 | Cleavage    | Symbols: Leucine-rich repeat protein kinase family protein   chr3:17347103-17350296 REVERSE LENGTH=3078                                                                                                                                          |
| AT3G47160 | UUGCAGAUUGGAGUAUACAAC   | 101   | 4   | Cleavage    | Symbols: RING/U-box superfamily protein   chr3:17359988-17362118 REVERSE LENGTH=1227                                                                                                                                                             |
| AT3G47400 | UAUACGACCGGUGUUGUUGUC   | 119   | 5   | Cleavage    | Symbols: Plant invertase/pectin methylesterase inhibitor superfamily   chr3:17465590-17468118 FORWARD LENGTH=2054                                                                                                                                |
| AT3G47470 | CCACGCAUCUAGCAACGUC     | 122   | 3.5 | Cleavage    | Symbols: LHCA4, CAB4   light-harvesting chlorophyll-protein complex subunit A4   chr3:17493372-17495033 REVERSE LENGTH=1266                                                                                                                      |
| AT3G47890 | UGUCGCAACUUAUCUACCCU    | 279   | 3.5 | Translation | Symbols: Ubiquitin carboxyl-terminal hydrolase-related protein   chr3:17666927-1767330 REVERSE LENGTH=4952                                                                                                                                       |
| AT3G47930 | UUUGGGGCUAACUUCUGCAAG   | 3787  | 4   | Cleavage    | Symbols: ATGLD1, GLD1   L-galactono-1,4-lactone dehydrogenase   chr3:17684444-17687620 FORWARD LENGTH=2027                                                                                                                                       |
| AT3G47960 | UUUAACAACUAAGGUUCUGU    | 1055  | 4   | Cleavage    | Symbols: Major facilitator superfamily protein   chr3:17697942-17700833 REVERSE LENGTH=2157                                                                                                                                                      |
| AT3G48170 | UGACGCCAAUUCUGAAGUUU    | 154   | 4   | Cleavage    | Symbols: ALDH10A9   aldehyde dehydrogenase 10A9   chr3:17786140-17790008 REVERSE LENGTH=1752                                                                                                                                                     |
| AT3G48210 | UGUGGAUACAAGACUGGGCU    | 215   | 2.5 | Translation | Symbols: CONTAINS InterPro DOMAIN/s: Kinetochore-Ndc80 complex, subunit Spc25 (InterPro:IPR013255); Has 194 Blast hits to 194 proteins in 72 species: Archae - 0; Bacteria - 4; Metazoa - 72; Fungi - 39; Plants - 62; Viruses - 0; Other Eukary |
| AT3G48425 | UUGGGCUCUACUUCUGAAGU    | 955   | 5   | Cleavage    | Symbols: DNase I-like superfamily protein   chr3:17931818-17934744 FORWARD LENGTH=1438                                                                                                                                                           |
| AT3G48430 | UCUUGGCAUGGAUUGAACUC    | 189   | 4   | Translation | Symbols: REF6   relative of early flowering 6   chr3:17935609-17940746 FORWARD LENGTH=4373                                                                                                                                                       |
| AT3G48460 | UUCGAGAACUAAGUAAGUUUA   | 448   | 4   | Cleavage    | Symbols:   GDSL-like Lipase/Acylhydrolase superfamily protein   chr3:17949445-17951195 FORWARD LENGTH=1310                                                                                                                                       |
| AT3G48540 | UCUGAACCUAAGGCCACCAA    | 493   | 4   | Cleavage    | Symbols:   Cytidine/deoxycytidylate deaminase family protein   chr3:17989798-17992015 REVERSE LENGTH=699                                                                                                                                         |
| AT3G48690 | UGACACGAUUCUGUAUGCAU    | 377   | 4.5 | Cleavage    | Symbols: ATCXE12, CXE12   alpha/beta-Hydrolases superfamily protein   chr3:18037047-18038234 REVERSE LENGTH=1188                                                                                                                                 |
| AT3G48710 | CUACAAAUUGAGCACUCCU     | 156   | 4.5 | Cleavage    | Symbols:   DEK domain-containing chromatin associated protein   chr3:18040937-18044226 FORWARD LENGTH=1707                                                                                                                                       |
| AT3G48770 | CUGGAGGAGCUAGCAGACUCC   | 113   | 5   | Cleavage    | Symbols: DNA binding-ATP binding   chr3:18078474-18086817 REVERSE LENGTH=6125                                                                                                                                                                    |
| AT3G48800 | UCUUGACUUCUUCUUCUACAG   | 209   | 4   | Cleavage    | Symbols: Sterile alpha motif (SAM) domain-containing protein   chr3:18095825-18096663 REVERSE LENGTH=837                                                                                                                                         |
| AT3G48870 | UAUAGGCGUUGAAGAAGUUC    | 535   | 4.5 | Cleavage    | Symbols: ATPCLP, ATPSP93-III, HSP93-III   Clp ATPase   chr3:18122198-18126638 REVERSE LENGTH=3157                                                                                                                                                |
| AT3G48880 | UCUUGGCAUGUUGAAGAUU     | 121   | 4.5 | Cleavage    | Symbols: RNI-like superfamily protein   chr3:18126870-18129172 FORWARD LENGTH=1191                                                                                                                                                               |
| AT3G48900 | UGAGGUGUGUAGAGCAUAUCU   | 117   | 4   | Translation | Symbols:   single-stranded DNA endonuclease family protein   chr3:18131829-18136341 FORWARD LENGTH=2031                                                                                                                                          |
| AT3G48940 | UGAAUUCUGGUACAUCUGACC   | 197   | 4.5 | Cleavage    | Symbols: Remorin family protein   chr3:18142863-18144163 REVERSE LENGTH=528                                                                                                                                                                      |
| AT3G48960 | UUUGAGAGCACUCCAGCGAGU   | 125   | 4   | Translation | Symbols:   Ribosomal protein L13e family protein   chr3:18150444-18151412 REVERSE LENGTH=621                                                                                                                                                     |
| AT3G49070 | UGCAGGCAUCUACUUCUGCG    | 100   | 3   | Translation | Symbols:   Protein of unknown function (DUF677)   chr3:18192479-18193729 REVERSE LENGTH=1251                                                                                                                                                     |
| AT3G49240 | UCAUCAUAGAACUUAUUGGU    | 103   | 4   | Cleavage    | Symbols: emb1796   Pentatricopeptide repeat (PPR) superfamily protein   chr3:18255979-18258100 FORWARD LENGTH=2122                                                                                                                               |
| AT3G49260 | UCAAAGGGAUUGAAGAUUGUU   | 102   | 3   | Cleavage    | Symbols:   iqd21   IQ-domain 21   chr3:18262399-18265979 FORWARD LENGTH=1740                                                                                                                                                                     |
| AT3G49410 | ACAAACUGUUGACACAGCCU    | 1107  | 4   | Cleavage    | Symbols:   Transcription factor IIIC, subunit 5   chr3:18324746-18329191 FORWARD LENGTH=1990                                                                                                                                                     |
| AT3G49500 | UCACAUUGGGGAGCUUGUACC   | 187   | 3.5 | Cleavage    | Symbols: RDR6, SGS2, SDE1   RNA-dependent RNA polymerase 6   chr3:18349161-18353624 REVERSE LENGTH=3786                                                                                                                                          |
| AT3G49710 | UGAGUAGAAUUGCAUCAUAUC   | 114   | 3.5 | Translation | Symbols:   Pentatricopeptide repeat (PPR) superfamily protein   chr3:18437845-18440010 FORWARD LENGTH=2166                                                                                                                                       |
| AT3G49725 | UGUCUUAACCGUACUGCGCU    | 150   | 3.5 | Translation | Symbols:   GTP-binding protein, HflX   chr3:18442275-18445457 REVERSE LENGTH=2096                                                                                                                                                                |
| AT3G49830 | UUGGGGACGCAUCUUGAAG     | 334   | 2   | Translation | Symbols:   P-loop containing nucleoside triphosphate hydrolases superfamily protein   chr3:18482383-18483940 FORWARD LENGTH=1422                                                                                                                 |
| AT3G49950 | UUGGGCUGAGGUUGGAGCCU    | 272   | 3.5 | Cleavage    | Symbols:   GRAS family transcription factor   chr3:18522510-18523906 FORWARD LENGTH=1397                                                                                                                                                         |
| AT3G50100 | UGUGAACCGAUUCUUGAUUGC   | 114   | 4   | Cleavage    | Symbols: SDN1   small RNA degrading nuclease 1   chr3:18578353-18580594 FORWARD LENGTH=1288                                                                                                                                                      |
| AT3G50110 | UUUGUACCGGAGUAUUGGAU    | 816   | 4   | Cleavage    | Symbols: ATPEN3, PEN3   PTEIN 3   chr3:18580609-18584535 REVERSE LENGTH=2251                                                                                                                                                                     |
| AT3G50270 | UCCGAACCAUGAUUGUAAGGS   | 236   | 4.5 | Cleavage    | Symbols:   HXDDX-type acyl-transferase family protein   chr3:18635920-18637341 FORWARD LENGTH=1422                                                                                                                                               |
| AT3G50295 | UGCAGCAACUUGUUGAAGAU    | 121   | 3.5 | Translation | Symbols:   pseudogene, hypothetical protein   chr3:18641798-18642664 FORWARD LENGTH=867                                                                                                                                                          |
| AT3G50310 | UUGUGAGUGUUGUUGAGUGUCU  | 141   | 3.5 | Cleavage    | Symbols: MAPKK20   mitogen-activated protein kinase kinase 20   chr3:18648151-18649521 REVERSE LENGTH=1371                                                                                                                                       |
| AT3G50350 | UUGAGAGCAUCUCCACGACUG   | 261   | 4.5 | Cleavage    | Symbols:   Protein of unknown function (DUF1685)   chr3:18672102-18674022 FORWARD LENGTH=935                                                                                                                                                     |
| AT3G50380 | UAUCUCUAGAGGAGGUGCUGGC  | 334   | 3.5 | Cleavage    | Symbols:   Protein of unknown function (DUF1162)   chr3:18686443-18700533 REVERSE LENGTH=9303                                                                                                                                                    |
| AT3G50390 | UUAAGCAACUUCUAGCCAGCU   | 3733  | 4   | Cleavage    | Symbols:   Transducin/WD40 repeat-like superfamily protein   chr3:18702074-18703619 FORWARD LENGTH=1546                                                                                                                                          |
| AT3G50670 | CUAGAUAUUCUUCUCCUUAUCU  | 235   | 5   | Cleavage    | Symbols:   U170K, U1SNRNP   U1 small nuclear ribonucleoprotein-70K   chr3:18826300-18829618 REVERSE LENGTH=1586                                                                                                                                  |
| AT3G50720 | UUGAACAAGCGUAUGAAGUUG   | 102   | 4.5 | Cleavage    | Symbols:   Protein kinase superfamily protein   chr3:18847519-18849430 REVERSE LENGTH=1134                                                                                                                                                       |
| AT3G50950 | UGCCAUAUGUAGAGAGCGCCU   | 164   | 4.5 | Cleavage    | Symbols: ZAR1   HOPZ-ACTIVATED RESISTANCE 1   chr3:18935714-18938685 FORWARD LENGTH=2750                                                                                                                                                         |
| AT3G51010 | UACCGGAGGAGCUUAUAGU     | 401   | 4   | Translation | Symbols:   unknown protein; FUNCTIONS IN: molecular_function unknown; INVOLVED IN: biological_process unknown; LOCATED IN: mitochondrion, plastid; EXPRESSED IN: 22 plant structures; EXPRESSED DURING: 13 growth stages; Has 24 Bla             |
| AT3G51070 | UACUCGACCAACUUGUUGAAG   | 183   | 4.5 | Cleavage    | Symbols:   S-adenosyl-L-methionine-dependent methyltransferases superfamily protein   chr3:18969068-18972291 FORWARD LENGTH=2688                                                                                                                 |
| AT3G51290 | UUGGUCUGGGCAUUCUCGCG    | 147   | 3.5 | Translation | Symbols:   Protein of unknown function (DUF630);Protein of unknown function (DUF632)   chr3:19039980-19042569 FORWARD LENGTH=2037                                                                                                                |
| AT3G51360 | UACAAGGUAUGGAAGAUUGUU   | 102   | 2.5 | Cleavage    | Symbols:   Eukaryotic aspartyl protease family protein   chr3:19064294-19066560 REVERSE LENGTH=1467                                                                                                                                              |
| AT3G51370 | AAACAGGCAAGAUUACUCGGC   | 986   | 3.5 | Translation | Symbols:   Protein phosphatase 2C family protein   chr3:19069371-19072195 FORWARD LENGTH=1671                                                                                                                                                    |
| AT3G51460 | UACUUGUAGAACUUGACCGGCU  | 158   | 3.5 | Cleavage    | Symbols: RHM4   Phosphoinositide phosphatase family protein   chr3:19092518-19097353 FORWARD LENGTH=2379                                                                                                                                         |
| AT3G51490 | CAAGAGGACACGACACUAGG    | 169   | 5   | Cleavage    | Symbols: TMT3   tonoplast monosaccharide transporter 3   chr3:19104885-19107797 REVERSE LENGTH=2582                                                                                                                                              |
| AT3G51895 | UUGGACCGCUUAUUCUUCUC    | 179   | 4   | Cleavage    | Symbols: SULTR3.1, AST12   sulfate transporter 3.1   chr3:19251287-19255760 REVERSE LENGTH=2276                                                                                                                                                  |
| AT3G51970 | UUCUGGCUUGUAGACUUGAGUA  | 114   | 3.5 | Cleavage    | Symbols: ATBOL1, ASAT1, ATASAT1   acyl-CoA sterol acyl transferase 1   chr3:19284339-19285582 FORWARD LENGTH=1244                                                                                                                                |
| AT3G52150 | UGCAGCAACUUGUUGAAGAUU   | 121   | 3.5 | Translation | Symbols:   RNA-binding (RRM/RBD/RNP motifs) family protein   chr3:19342024-19343448 FORWARD LENGTH=1064                                                                                                                                          |
| AT3G52310 | UUGAACAAAGCGUGAUGAUGU   | 102   | 3.5 | Cleavage    | Symbols:   ABC-2 type transporter family protein   chr3:19398628-19402953 FORWARD LENGTH=2482                                                                                                                                                    |
| AT3G52340 | AUACCCAAACUUGAACUUCUUC  | 127   | 3.5 | Cleavage    | Symbols: SP22, ATPSP2   sucrose-6P-phosphate phosphohydrolase 2   chr3:19407052-19409335 FORWARD LENGTH=1568                                                                                                                                     |
| AT3G52370 | UAGAUAUUAUGUUGCUUGGCA   | 194   | 3.5 | Cleavage    | Symbols:   FLA15   FASCICLIN-like arabinogalactan protein 15 precursor   chr3:19417490-19419782 FORWARD LENGTH=1603                                                                                                                              |
| AT3G52570 | UGGGGCUCAACUUCUGCAAGG   | 10625 | 5   | Cleavage    | Symbols:   alpha/beta-Hydrolases superfamily protein   chr3:19501130-19502999 FORWARD LENGTH=1227                                                                                                                                                |
| AT3G52600 | UAACUUCUACCUUUGCAUCUG   | 727   | 4   | Translation | Symbols: CWINV2, CWINV2   cell wall invertase 2   chr3:19506891-19509359 REVERSE LENGTH=2048                                                                                                                                                     |
| AT3G52840 | AUACCCAAACUUGAACUUCUUC  | 127   | 3   | Translation | Symbols: BGAL2   beta-galactosidase 2   chr3:19581113-19586299 FORWARD LENGTH=2517                                                                                                                                                               |
| AT3G52880 | UGGAGUAUGGAGUACACGACU   | 163   | 5   | Translation | Symbols: ATMDAR1, MDAR1   monodehydroascorbate reductase 1   chr3:19601212-19604454 REVERSE LENGTH=1658                                                                                                                                          |
| AT3G52930 | UUGAGAGCCUGUUGUAGUUGU   | 262   | 3   | Cleavage    | Symbols:   Aldolase superfamily protein   chr3:19626748-19629073 REVERSE LENGTH=1911                                                                                                                                                             |
| AT3G53020 | UCACUCGCAUCUUGAAGACU    | 146   | 3.5 | Cleavage    | Symbols: STV1, RPL24   Ribosomal protein L24e family protein   chr3:19660517-19662025 REVERSE LENGTH=837                                                                                                                                         |
| AT3G53130 | UUGGGAGACUUAUGACAGAG    | 515   | 4   | Cleavage    | Symbols: TET1, CYP97C1   Cytochrome P450 superfamily protein   chr3:19692771-19697542 FORWARD LENGTH=3341                                                                                                                                        |
| AT3G53170 | CUAGAAUUCUUCUCCUUAUCU   | 235   | 3   | Cleavage    | Symbols:   Tetra- and pentapeptide repeat (TPR)-like superfamily protein   chr3:19704485-19706417 REVERSE LENGTH=1615                                                                                                                            |
| AT3G53210 | UCUGAGUGUUGUUGAGGUGU    | 178   | 3   | Translation | Symbols:   Ucdulin-like MIM21/FamA-like transporter family protein   chr3:19720165-19721875 FORWARD LENGTH=1238                                                                                                                                  |
| AT3G53250 | UUUGUGAAUUGUUGUUGUUGU   | 152   | 4.5 | Cleavage    | Symbols:   SAUR-like auxin-responsive protein family   chr3:19742568-19743297 FORWARD LENGTH=330                                                                                                                                                 |
| AT3G53480 | UUUGAGGACCAACUUGAAGU    | 1012  | 3.5 | Cleavage    | Symbols: PIS1, PD9, ATPDR9, ABCG37   pleiotropic drug resistance 9   chr3:19825307-19831797 FORWARD LENGTH=4565                                                                                                                                  |
| AT3G53550 | UUGGGGCUCAACUUCUGAAGG   | 4868  | 4   | Cleavage    | Symbols:   FBD-like domain family protein   chr3:19856870-19858308 FORWARD LENGTH=771                                                                                                                                                            |
| AT3G53620 | UACCGGAGGAGCUAUAUGCU    | 401   | 4   | Cleavage    | Symbols: ATPP4, Ppa4   pyrophosphorylase 4   chr3:19880504-19883672 FORWARD LENGTH=1296                                                                                                                                                          |
| AT3G53780 | UGAGGUGUGUAGAGCAUAUCU   | 117   | 3.5 | Cleavage    | Symbols: ATRBL4, RBL4   RHOMBOLD-like protein 4   chr3:19924568-19927026 REVERSE LENGTH=1654                                                                                                                                                     |
| AT3G53930 | UGCCAUAUGAGAGAGCUGCCU   | 164   | 4   | Translation | Symbols:   Protein kinase superfamily protein   chr3:19966352-19970813 FORWARD LENGTH=2558                                                                                                                                                       |
| AT3G53940 | UGGAUUCGGGUGCAUUAUCC    | 392   | 4.5 | Cleavage    | Symbols:   Mitochondrial substrate carrier family protein   chr3:19971019-19973769 REVERSE LENGTH=1542                                                                                                                                           |
| AT3G54050 | UCACAUUGGGAGCUCUGUACC   | 187   | 3.5 | Translation | Symbols: HCEF1   high cyclic electron flow 1   chr3:20016892-20018822 FORWARD LENGTH=1379                                                                                                                                                        |
| AT3G54100 | UGAAGGAUUGUGGUUAACCA    | 474   | 4   | Cleavage    | Symbols:   O-fucosyltransferase family protein   chr3:20034071-20037953 REVERSE LENGTH=2376                                                                                                                                                      |
| AT3G54410 | UGUAUGUAUUAUGUGGGACU    | 149   | 4   | Cleavage    | Symbols:   Protein of unknown function (DUF1163)   chr3:20144551-20145489 FORWARD LENGTH=939                                                                                                                                                     |
| AT3G54430 | UAAACAAGAACUUCUUCUUCU   | 235   | 3.5 | Cleavage    | Symbols: SR56   SHI-related sequence 6   chr3:20147101-20148127 REVERSE LENGTH=951                                                                                                                                                               |
| AT3G54440 | UCAUAUGGACUUAUGGCUACAC  | 101   | 4.5 | Cleavage    | Symbols:   Glycoside hydrolase family 2 protein   chr3:20148336-20157138 REVERSE LENGTH=3601                                                                                                                                                     |
| AT3G54460 | UAGAGUUAAGUUGGGACAGGA   | 199   | 3   | Translation | Symbols:   SNF2 domain-containing protein / helicase domain-containing protein / F-box family protein   chr3:20161942-20167293 REVERSE LENGTH=4352                                                                                               |
| AT3G54660 | UACAAGGUAUGGAAGAUUGUU   | 102   | 3   | Cleavage    | Symbols: GR, EMB2360, ATRG2   glutathione reductase   chr3:20229744-20233182 REVERSE LENGTH=2196                                                                                                                                                 |
| AT3G54690 | UCUGAGUGUUAUGUGAGGUGU   | 178   | 4.5 | Cleavage    | Symbols:   Sugar isomerase (SI) family protein   chr3:20246539-20248140 FORWARD LENGTH=1430                                                                                                                                                      |
| AT3G54720 | UGAGGAGCAAGUAAGUGUCU    | 255   | 4   | Translation | Symbols: AMP1, COP2, HPT, PT, MFO1   Peptidase M28 family protein   chr3:20254725-20257848 REVERSE LENGTH=2278                                                                                                                                   |
| AT3G54740 | UUUAAAACGAGACUUAUUGC    | 115   | 3.5 | Cleavage    | Symbols:   Protein of unknown function (DUF593)   chr3:20262391-20264601 FORWARD LENGTH=1703                                                                                                                                                     |
| AT3G54780 | UUUCUGACGGCAAGUAAGU     | 480   | 5   | Cleavage    | Symbols:   Zinc finger (C3HC4-type RING finger) family protein   chr3:20278954-20281544 FORWARD LENGTH=2045                                                                                                                                      |
| AT3G54850 | UGUGUAUGCAUUAUCUGGGAC   | 106   | 3.5 | Cleavage    | Symbols: ATPUB14, PUB14   plant U-box 14   chr3:20321422-20324020 FORWARD LENGTH=2173                                                                                                                                                            |

|           |                           |       |     |             |                                                                                                                                                                                                                                                         |
|-----------|---------------------------|-------|-----|-------------|---------------------------------------------------------------------------------------------------------------------------------------------------------------------------------------------------------------------------------------------------------|
| AT3G54930 | UUCGCGAGGAGGAGGUCUC       | 112   | 3   | Cleavage    | [ Symbols:   Protein phosphatase 2A regulatory B subunit family protein   chr3:20350839-20352948 REVERSE LENGTH=1924                                                                                                                                    |
| AT3G54940 | UAACUACUACCCUUGUACAGC     | 727   | 3   | Cleavage    | [ Symbols:   Papain family cysteine protease   chr3:20354351-20356318 FORWARD LENGTH=1346                                                                                                                                                               |
| AT3G55070 | UUGAGAGCCUUGUAGUAGUCU     | 262   | 3   | Translation | [ Symbols:   Lish/CRA/RING-U-box domains-containing protein   chr3:20408286-20411140 FORWARD LENGTH=1601                                                                                                                                                |
| AT3G55170 | UUGGACACUCCUAGACCGCA      | 160   | 3.5 | Cleavage    | [ Symbols:   Ribosomal L29 family protein   chr3:20452969-20454342 REVERSE LENGTH=568                                                                                                                                                                   |
| AT3G55254 | UAACAAGAACUUCUUCUUCUUCU   | 235   | 2.5 | Cleavage    | [ Symbols:   Plant self-incompatibility protein S1 family   chr3:20482190-20482813 REVERSE LENGTH=624                                                                                                                                                   |
| AT3G55330 | UUGAACCAAGCCUGAUGAAGU     | 102   | 4   | Translation | [ Symbols:   PPL1   Pdp-like protein 1   chr3:20513825-20515351 REVERSE LENGTH=975                                                                                                                                                                      |
| AT3G55370 | UGAGAAAGCCUGCGCAUUGGA     | 158   | 4.5 | Translation | [ Symbols:   OBP3   OBP-binding protein 3   chr3:20527063-20529291 FORWARD LENGTH=1522                                                                                                                                                                  |
| AT3G55410 | AUUUGAUGAUGAUGAACCCU      | 768   | 3.5 | Cleavage    | [ Symbols:   2-oxoglutarate dehydrogenase, E1 component   chr3:20541435-20546034 FORWARD LENGTH=3494                                                                                                                                                    |
| AT3G55677 | UCCGUAGAUUAUCAAACUG       | 281   | 4.5 | Cleavage    | [ Symbols:   Plant self-incompatibility protein S1 family   chr3:20663983-20664576 FORWARD LENGTH=594                                                                                                                                                   |
| AT3G55820 | UACAGCAGAUUCUGAUUGCAU     | 377   | 4.5 | Cleavage    | [ Symbols:   Fascilin-like arabinogalactan family protein   chr3:20713709-20714805 FORWARD LENGTH=1097                                                                                                                                                  |
| AT3G56000 | UACAUAUUCGAGCAGUCCUCG     | 156   | 4   | Cleavage    | [ Symbols:   ATSLA14, CSLA14   cellulose synthase like A14   chr3:20783318-20785796 REVERSE LENGTH=1864                                                                                                                                                 |
| AT3G56020 | UGAGCGGACCAAGAGUAGUUAUC   | 111   | 4.5 | Cleavage    | [ Symbols:   Ribosomal protein L41 family   chr3:20790570-20791085 REVERSE LENGTH=376                                                                                                                                                                   |
| AT3G56120 | AUGGAUUAUAGAACUUGCGGUC    | 196   | 3   | Cleavage    | [ Symbols:   S-adenosyl-L-methionine-dependent methyltransferases superfamily protein   chr3:20823146-20826543 FORWARD LENGTH=1690                                                                                                                      |
| AT3G56230 | UCUAGUUCGCAUUAUUUGGAC     | 421   | 3   | Cleavage    | [ Symbols:   BTB/POZ domain-containing protein   chr3:20860778-20862265 REVERSE LENGTH=1100                                                                                                                                                             |
| AT3G56330 | UGAGGUCGAGUAGAGCAUAUUA    | 117   | 4   | Cleavage    | [ Symbols:   N2,N2-dimethylguanosine tRNA methyltransferase   chr3:20890250-20892002 FORWARD LENGTH=1371                                                                                                                                                |
| AT3G56370 | CGUACAGUUGUUAUUCUGGAG     | 272   | 4.5 | Cleavage    | [ Symbols:   Leucine-rich repeat protein kinase family protein   chr3:20899099-20902981 REVERSE LENGTH=3416                                                                                                                                             |
| AT3G56480 | UACAGGAAGUGGGCGCACACC     | 102   | 3.5 | Cleavage    | [ Symbols:   myosin heavy chain-related   chr3:20936098-20939631 REVERSE LENGTH=2164                                                                                                                                                                    |
| AT3G56650 | UAAGGAGAGUCAGCUUAUUGGA    | 134   | 3.5 | Translation | [ Symbols:   Mog1/PsbP/DUF1795-like photosystem II reaction center PsbP family protein   chr3:20984752-20986131 FORWARD LENGTH=1062                                                                                                                     |
| AT3G56850 | UUGCAGAGAUGGAUGUAACAAC    | 101   | 3   | Cleavage    | [ Symbols:   AREB3, DBPF3   ABA-responsive element binding protein 3   chr3:21046341-21048516 REVERSE LENGTH=1729                                                                                                                                       |
| AT3G56920 | UUGGCGACGCAUCUUGAAAG      | 334   | 1   | Cleavage    | [ Symbols:   DREH2-type zinc finger family protein   chr3:21070648-21072702 FORWARD LENGTH=1464                                                                                                                                                         |
| AT3G56950 | CAAAUUCGAGAACUCCUGAC      | 283   | 4   | Cleavage    | [ Symbols:   SIP2.1   small and basic intrinscine protein 2.1   chr3:21078297-21079856 REVERSE LENGTH=1109                                                                                                                                              |
| AT3G57020 | UAATCCAAACUUGAACUUCUUCU   | 127   | 3.5 | Cleavage    | [ Symbols:   Calcium-dependent phosphotriesterase superfamily protein   chr3:21059315-21100359 REVERSE LENGTH=1327                                                                                                                                      |
| AT3G57030 | UUCUGUAGCAGGAGUUAUCCU     | 518   | 4.5 | Translation | [ Symbols:   Calcium-dependent phosphotriesterase superfamily protein   chr3:21101457-21103293 REVERSE LENGTH=1410                                                                                                                                      |
| AT3G57040 | UUUUGCUUACUUAUGAAGAAUCU   | 179   | 4.5 | Cleavage    | [ Symbols:   ARR9, ATIR4   response regulator 9   chr3:21109614-21111432 FORWARD LENGTH=1354                                                                                                                                                            |
| AT3G57170 | UUUAUUCACACAGUGACUGUG     | 302   | 5   | Translation | [ Symbols:   N-acetylglucosaminyl transferase component family protein / Gpi1 family protein   chr3:21159407-21163184 REVERSE LENGTH=2405                                                                                                               |
| AT3G57200 | UGAGAAGCCUGCGCAUUGGA      | 158   | 4   | Translation | [ Symbols:   unknown protein; BEST Arabidopsis thaliana protein match is: unknown protein (TAIR:AT2G41451.1); Has 94 Blast hits to 94 proteins in 31 species: Archae - 0; Bacteria - 12; Metazoa - 0; Fungi - 0; Plants - 77; Viruses - 0; Other Eukary |
| AT3G57240 | UGAGGUCGAGUAGGAGCGUGA     | 416   | 4.5 | Cleavage    | [ Symbols:   BG3   beta-1,3-glucanase 3   chr3:21181742-21183075 REVERSE LENGTH=1230                                                                                                                                                                    |
| AT3G57330 | UCCACCCGAGUAGCAAAUUG      | 1524  | 4.5 | Cleavage    | [ Symbols:   ACA11   autoinhibited Ca2+-ATPase 11   chr3:21211456-21216375 REVERSE LENGTH=3277                                                                                                                                                          |
| AT3G57390 | UAGAUAUAUACUUGUUGGCA      | 194   | 4   | Cleavage    | [ Symbols:   AGSL18   AGAMOUS-like 18   chr3:21233701-21235911 FORWARD LENGTH=1156                                                                                                                                                                      |
| AT3G57400 | UACAGGAAGUGGGCGCACACC     | 102   | 4.5 | Cleavage    | [ Symbols:   unknown protein; FUNCTIONS IN: molecular_function unknown; INVOLVED IN: N-terminal protein myristoylation; LOCATED IN: cellular_component unknown; BEST Arabidopsis thaliana protein match is: unknown protein (TAIR:AT5G                  |
| AT3G57480 | UAUGUCUUCUUGUUAUCCACU     | 344   | 2.5 | Translation | [ Symbols:   zinc finger (C2H2 type, AN1-like) family protein   chr3:21277936-21279354 REVERSE LENGTH=1132                                                                                                                                              |
| AT3G57550 | UUGAGGAGAUUAUGACGCGCC     | 4887  | 5   | Cleavage    | [ Symbols:   AGK2, GK-2   guanylate kinase   chr3:21306723-21309464 FORWARD LENGTH=1774                                                                                                                                                                 |
| AT3G57720 | UGUGGAUAACAAGACUGCGGU     | 215   | 4.5 | Cleavage    | [ Symbols:   Protein kinase superfamily protein   chr3:21387722-21389726 FORWARD LENGTH=2005                                                                                                                                                            |
| AT3G57880 | UCCCGGAUUGUGAAGAAUGUA     | 113   | 3.5 | Translation | [ Symbols:   Calcium-dependent lipid-binding (CaLB domain) plant phosphoribosyltransferase family protein   chr3:21430983-21434600 REVERSE LENGTH=2960                                                                                                  |
| AT3G57960 | UCGAGUGACUUGGAGCCAUU      | 244   | 2   | Cleavage    | [ Symbols:   Emsy N Terminus (ENT) domain-containing protein   chr3:21463091-21464194 FORWARD LENGTH=672                                                                                                                                                |
| AT3G58040 | UUGGAGGAGAUUAUGACGCGCC    | 4887  | 4.5 | Translation | [ Symbols:   SINAT2   seven in absentia of Arabidopsis 2   chr3:21488516-21491488 FORWARD LENGTH=1601                                                                                                                                                   |
| AT3G58050 | AUUUGAACUUAUGGAUAGUCCU    | 768   | 4   | Cleavage    | [ Symbols:   unknown protein; BEST Arabidopsis thaliana protein match is: unknown protein (TAIR:AT2G41960.1); Has 13384 Blast hits to 8116 proteins in 546 species: Archae - 41; Bacteria - 766; Metazoa - 5596; Fungi - 1431; Plants - 589; Viruse     |
| AT3G58140 | UACUCUGCAUUCUUAAGAACUC    | 146   | 4   | Translation | [ Symbols:   phenylalanyl-tRNA synthetase class IIc family protein   chr3:21529731-21532572 REVERSE LENGTH=1733                                                                                                                                         |
| AT3G58160 | UCUGUAUACUAUACUUGGACUUC   | 686   | 4   | Cleavage    | [ Symbols:   XJ1, ATXU1, ATMYO53, MYA3, XJ-16   P-loop containing nucleotide triphosphate hydrolases superfamily protein   chr3:21534797-21541877 FORWARD LENGTH=3729                                                                                   |
| AT3G58190 | UUGGGAGACUAUUGACACGAG     | 515   | 4   | Cleavage    | [ Symbols:   LBQ29, ASL16   lateral organ boundaries domain 29   chr3:21548484-21549558 REVERSE LENGTH=959                                                                                                                                              |
| AT3G58250 | CAAAUUCUUAUACUUCUCCU      | 197   | 0   | Cleavage    | [ Symbols:   TRAF-like family protein   chr3:21570745-21572143 REVERSE LENGTH=954                                                                                                                                                                       |
| AT3G58260 | UUAAGACUUCGACGAAUUGAGCGCC | 104   | 3.5 | Cleavage    | [ Symbols:   TRAF-like family protein   chr3:21573754-21575369 REVERSE LENGTH=1221                                                                                                                                                                      |
| AT3G58270 | UCGAGGGCAGGAAUAUUGACU     | 334   | 2.5 | Cleavage    | [ Symbols:   Arabidopsis phospholipase-like protein (PEARU1 4) with TRAF-like domain   chr3:21575887-21577830 REVERSE LENGTH=1223                                                                                                                       |
| AT3G58550 | CUUGGGACUAGCAUUAUGAACUC   | 1059  | 3   | Cleavage    | [ Symbols:   Bifunctional inhibitor/lipid-transfer protein/seed storage 2S albumin superfamily protein   chr3:21649364-21650287 REVERSE LENGTH=730                                                                                                      |
| AT3G58610 | UGAGCGGACCAAGUAGUAGUUC    | 111   | 3   | Cleavage    | [ Symbols:   ketol-acid reductoisomerase   chr3:21671433-21675090 FORWARD LENGTH=2133                                                                                                                                                                   |
| AT3G58680 | UAAACUUGAACCAUUGUAGUA     | 302   | 4   | Cleavage    | [ Symbols:   MBF1B, ATMBF1B   multiprotein binding factor 1B   chr3:21707276-21708911 FORWARD LENGTH=806                                                                                                                                                |
| AT3G58800 | UUAACCCGACGCGGUUAUAG      | 267   | 4.5 | Translation | [ Symbols:   unknown protein; Has 75 Blast hits to 75 proteins in 23 species: Archae - 0; Bacteria - 0; Metazoa - 0; Fungi - 0; Plants - 53; Viruses - 17; Other Eukaryotes - 5 (source: NCBI BLINK).   chr3:21748228-21749928 FORWARD LENGTH=1515      |
| AT3G58980 | UAUGUCUUCUUGUUAUCCACU     | 344   | 3.5 | Translation | [ Symbols:   F-box family protein   chr3:21794445-21797006 REVERSE LENGTH=1785                                                                                                                                                                          |
| AT3G59040 | UUUAGGAUUGUUGCAUUGACA     | 1164  | 3   | Cleavage    | [ Symbols:   Tetra peptide repeat (TPR)-like superfamily protein   chr3:21821349-21824348 REVERSE LENGTH=2013                                                                                                                                           |
| AT3G59050 | UGUUACGAGACUUGAAGCCAG     | 574   | 3.5 | Cleavage    | [ Symbols:   ATPAO3, PAO3   polyamine oxidase 3   chr3:21824696-21827509 REVERSE LENGTH=2039                                                                                                                                                            |
| AT3G59052 | UGUUACGAGACUUAAGCCAG      | 574   | 3.5 | Cleavage    | [ Symbols:   CpUDORF18   conserved peptide upstream open reading frame 18   chr3:21824696-21827509 REVERSE LENGTH=2039                                                                                                                                  |
| AT3G59090 | UACUCGACCAACACUAGCUGG     | 106   | 3.5 | Cleavage    | [ Symbols:   CONTAINS InterPro DOMAIN(s): Protein of unknown function DUF1084 (InterPro:IPRO09457); BEST Arabidopsis thaliana protein match is: tobamovirus multiplication 1 (TAIR:AT4G21790.1); Has 198 Blast hits to 197 proteins in 29 spec          |
| AT3G59130 | UUUCUGAUUGCAUGUGUGUUAAC   | 110   | 3.5 | Cleavage    | [ Symbols:   Cysteine/Histidine-rich C1 domain family protein   chr3:21860986-21862807 REVERSE LENGTH=1323                                                                                                                                              |
| AT3G59140 | UGUGAGUGUUGUUGAGGUCUCU    | 178   | 3.5 | Cleavage    | [ Symbols:   ATMRP14, MRP14, ABCC10   multidrug resistant-ace-associated protein 14   chr3:21863420-21868701 REVERSE LENGTH=4461                                                                                                                        |
| AT3G59570 | UUGGAGUUGGUCUUAUCCUGA     | 125   | 4   | Cleavage    | [ Symbols:   Ynr1/Rab-GAP domain of gyp1 superfamily protein   chr3:22000832-22006056 REVERSE LENGTH=2631                                                                                                                                               |
| AT3G59690 | CAGAACCCCGACGACACUUCG     | 169   | 3   | Translation | [ Symbols:   IQD13   IQ-domain 13   chr3:22048754-22051673 FORWARD LENGTH=2006                                                                                                                                                                          |
| AT3G59740 | UGUGGUGGAGUAGACGAUUCU     | 111   | 3   | Cleavage    | [ Symbols:   Concanavalin A-like lectin protein kinase family protein   chr3:22066987-22069058 REVERSE LENGTH=2072                                                                                                                                      |
| AT3G59890 | UCUAGUCCGAAAAUUGCGAAC     | 163   | 4   | Cleavage    | [ Symbols:   Dihydrodipicolinate reductase, bacterial/plant   chr3:22124242-22126630 REVERSE LENGTH=1444                                                                                                                                                |
| AT3G59910 | UAACUUCUACCCUUAUUGCACUCG  | 727   | 2.5 | Translation | [ Symbols:   Ankryrin repeat family protein   chr3:22130483-22133583 REVERSE LENGTH=2480                                                                                                                                                                |
| AT3G59920 | UACCGGAGGAGUUAUAGUUGC     | 401   | 4.5 | Cleavage    | [ Symbols:   ATGDI2, GD12   RAB GDP dissociation inhibitor 2   chr3:22134999-22138457 FORWARD LENGTH=1729                                                                                                                                               |
| AT3G60030 | UACUGGAGGAGCUUACGACCAU    | 949   | 5   | Cleavage    | [ Symbols:   SPL12   squamosa promoter-binding protein-like 12   chr3:22165654-22169572 REVERSE LENGTH=3148                                                                                                                                             |
| AT3G60080 | UGGCGCUAACUUCUGCAAGGU     | 10625 | 4.5 | Translation | [ Symbols:   RING-U-box superfamily protein   chr3:22187308-22188795 FORWARD LENGTH=1488                                                                                                                                                                |
| AT3G60100 | UGACGGAAGCUACAGAGGAUG     | 108   | 4   | Cleavage    | [ Symbols:   CSY5   citrate synthase 5   chr3:22192730-22196447 FORWARD LENGTH=1754                                                                                                                                                                     |
| AT3G60270 | UGACGCGAAUUCUGAAAGUUU     | 154   | 4   | Cleavage    | [ Symbols:   Cupced3   cupressin superfamily protein   chr3:22278029-22278762 REVERSE LENGTH=564                                                                                                                                                        |
| AT3G60280 | UUGGCGCAUUCUGAAAGUUU      | 154   | 4   | Cleavage    | [ Symbols:   UCC3   ucladynanin 3   chr3:22279664-22280675 REVERSE LENGTH=914                                                                                                                                                                           |
| AT3G60286 | UCUUGUCUUGAAACUUGCACC     | 171   | 2   | Translation | [ Symbols:   unknown protein; Has 30201 Blast hits to 17322 proteins in 780 species: Archae - 12; Bacteria - 1396; Metazoa - 17338; Fungi - 3422; Plants - 5037; Viruses - 0; Other Eukaryotes - 2996 (source: NCBI BLINK).   chr3:22281741-2228224     |
| AT3G60380 | UGCAUAUCUUGGGAGCUUAUCU    | 413   | 5   | Translation | [ Symbols:   FUNCTIONS IN: molecular_function unknown; INVOLVED IN: biological_process unknown; LOCATED IN: cellular_component unknown; EXPRESSED DURING: 13 growth stages; BEST Arabidopsis thali                                                      |
| AT3G60420 | UGACGGUUCAGAUUGACGAGC     | 107   | 4.5 | Cleavage    | [ Symbols:   Phosphoglycerate mutase family protein   chr3:22334424-22335787 FORWARD LENGTH=912                                                                                                                                                         |
| AT3G60470 | UUAUAUACAAGUACUGACUACU    | 2805  | 3   | Translation | [ Symbols:   Plant protein of unknown function (DUF2471)   chr3:22344813-22347121 FORWARD LENGTH=1860                                                                                                                                                   |
| AT3G60550 | UUGGGUGUGAGAACACAGACU     | 1291  | 3.5 | Translation | [ Symbols:   CYC3P2   cyclin ps2-2   chr3:22379805-22380641 FORWARD LENGTH=734                                                                                                                                                                          |
| AT3G60740 | UGACGACUUCUUCUUAUUGG      | 100   | 4.5 | Cleavage    | [ Symbols:   TTN1, EMB133, TFC-D, CHO   ARM repeat superfamily protein   chr3:22447245-22453364 REVERSE LENGTH=3944                                                                                                                                     |
| AT3G60770 | UGAAGGACAGAUAGACGUGUCU    | 415   | 3.5 | Translation | [ Symbols:   Ribosomal protein S13/S15   chr3:22460189-22461779 REVERSE LENGTH=915                                                                                                                                                                      |
| AT3G60790 | UAUGUCUUCUGUUAUUCACCU     | 344   | 3.5 | Cleavage    | [ Symbols:   F-box family protein   chr3:22464623-22466948 FORWARD LENGTH=1467                                                                                                                                                                          |
| AT3G60880 | UAGAUAUAAGUUGGGACAGGA     | 199   | 3.5 | Cleavage    | [ Symbols:   DHDP5, DHDP51   dihydrodipicolinate synthase 1   chr3:22494864-22496697 FORWARD LENGTH=1472                                                                                                                                                |
| AT3G60955 | UAUGGAUGAUGACGCAUUGCG     | 937   | 4.5 | Cleavage    | [ Symbols:   CYP76C8P   a cytochrome P450 pseudogene, overlaps with a real gene on the other strand.   chr3:22529643-22532476 REVERSE LENGTH=2834                                                                                                       |
| AT3G61020 | UCUGGUGAUGAGGGAUUAUUAUC   | 123   | 4   | Cleavage    | [ Symbols:   pseudogene, similar to P0034A04.28, several hypothetical proteins - Arabidopsis thaliana; blast match of 43% identity and a 2.2e-46 P-value to GP[29837187]dbj  BAC75569.1     APO04333 P0034A04.28 [Oryza sativa (japonica cultivar       |
| AT3G61060 | UAUGAGUUAUUGACGACGAAGU    | 123   | 4.5 | Cleavage    | [ Symbols:   ATPP2-A13, PP2-A13   phloem protein 2-A13   chr3:22602910-22604578 FORWARD LENGTH=1374                                                                                                                                                     |
| AT3G61130 | UUAACGAGACUUAAGCCAGCAU    | 3733  | 4   | Cleavage    | [ Symbols:   GAUT1, LGT1   galacturonosyltransferase 1   chr3:22621969-22625716 FORWARD LENGTH=2569                                                                                                                                                     |
| AT3G61250 | ACAAACUGUUAACAAAGCCU      | 1107  | 4.5 | Cleavage    | [ Symbols:   AYM1B7, MYB17   myb domain protein 17   chr3:22671002-22672738 FORWARD LENGTH=1391                                                                                                                                                         |
| AT3G61360 | AUUUGAACUUAUGGAUACCCU     | 768   | 5   | Cleavage    | [ Symbols:   Tetra peptide repeat (TPR)-like superfamily protein   chr3:22704304-22706138 REVERSE LENGTH=1835                                                                                                                                           |
| AT3G61420 | UUUCCGUUGGUGUGCGCCACC     | 458   | 3.5 | Cleavage    | [ Symbols:   BSD domain (BT2-like transcription factors, Synapse-associated proteins and DOS2-like proteins)   chr3:22727040-22731954 REVERSE LENGTH=2129                                                                                               |
| AT3G61580 | UUUGUAUUAACCGGAUAAACUC    | 175   | 3.5 | Cleavage    | [ Symbols:   BT2-like domain (BT2-like transcription factors, Synapse-associated proteins and DOS2-like proteins)   chr3:22727040-22731954 REVERSE LENGTH=2129                                                                                          |
| AT3G61670 | UGCAUAUCUUGGGAGCUUAUCU    | 413   | 4   | Cleavage    | [ Symbols:   Protein of unknown function (DUF1313)   chr3:22818589-22822020 FORWARD LENGTH=2873                                                                                                                                                         |
| AT3G61740 | UACCCGUAUGUGUCUUAACAG     | 192   | 4.5 | Cleavage    | [ Symbols:   SDG14, ATX3   SET domain protein 14   chr3:22850837-22856972 REVERSE LENGTH=3669                                                                                                                                                           |
| AT3G61980 | UCGAGACCUACUGUACUUGCG     | 100   | 5   | Translation | [ Symbols:   serine protease inhibitor, Kazal-type family protein   chr3:22956139-22956883 REVERSE LENGTH=745                                                                                                                                           |
| AT3G61990 | UUUGUGUAUCCUGUAGUGUUA     | 152   | 4   | Cleavage    | [ Symbols:   OMTF3   S-adenosyl-L-methionine-dependent methyltransferases superfamily protein   chr3:22957054-22958995 REVERSE LENGTH=1222                                                                                                              |
| AT3G62070 | CAUCAAGAACCGGUAUCCUUCU    | 125   | 4   | Cleavage    | [ Symbols:   unknown protein; BEST Arabidopsis thaliana protein match is: unknown protein (TAIR:AT2G46940.1); Has 137 Blast hits to 135 proteins in 12 species: Archae - 0; Bacteria - 0; Metazoa - 0; Fungi - 0; Plants - 137; Viruses - 0; Other Euk  |
| AT3G62080 | UAUAUACCGAGUAGUACACC      | 149   | 4.5 | Cleavage    | [ Symbols:   SNF7 family protein   chr3:22986174-22988777 FORWARD LENGTH=1666                                                                                                                                                                           |
| AT3G62110 | UGAGUGCGAGUAGAGCAUUAU     | 117   | 3.5 | Cleavage    | [ Symbols:   Pectin lyase-like superfamily protein   chr3:22997031-23000041 REVERSE LENGTH=2142                                                                                                                                                         |

|           |                         |       |     |             |                                                                                                                                                                                                                                                         |
|-----------|-------------------------|-------|-----|-------------|---------------------------------------------------------------------------------------------------------------------------------------------------------------------------------------------------------------------------------------------------------|
| AT3G62130 | UUUCUGAAGGACAAAGAUACGU  | 351   | 2.5 | Cleavage    | [ Symbols:   Pyridoxal phosphate (PLP)-dependent transferases superfamily protein   chr3:23004931-23007006 FORWARD LENGTH=1863                                                                                                                          |
| AT3G62360 | UAACUCUACCCUUUGUACACUG  | 727   | 4.5 | Cleavage    | [ Symbols:   Carbohydrate-binding-like fold   chr3:23072786-23080563 REVERSE LENGTH=4026                                                                                                                                                                |
| AT3G62590 | UAACAAGAACUCUUUCUUUUUCU | 235   | 3   | Cleavage    | [ Symbols:   alpha/beta-Hydrolases superfamily protein   chr3:23147918-23150352 REVERSE LENGTH=2188                                                                                                                                                     |
| AT3G62600 | CUCACAAGUAGUAUAGGGCUUG  | 110   | 4.5 | Cleavage    | [ Symbols:   ATERD3B8, ERD3B8   DNAJ heat shock family protein   chr3:23150790-23153510 REVERSE LENGTH=1453                                                                                                                                             |
| AT3G62610 | UGAGAAGAGUAUAGAAUAGAAUC | 103   | 2.5 | Cleavage    | [ Symbols:   ATMYB11, PFG2, MYB11   myb domain protein 11   chr3:23154758-23156585 FORWARD LENGTH=1246                                                                                                                                                  |
| AT3G62640 | UAACAAUUCGAGCAUCCUCCU   | 156   | 5   | Translation | [ Symbols:   Protein of unknown function (DUF3511)   chr3:23166289-23166900 REVERSE LENGTH=612                                                                                                                                                          |
| AT3G62700 | UAUCUCUGAGAGCGGUGUCUGCG | 334   | 4   | Cleavage    | [ Symbols:   ATMRP10, MRP10, ABCC14   multidrug resistance-associated protein 10   chr3:23190267-23195762 REVERSE LENGTH=4816                                                                                                                           |
| AT3G62780 | UUUCUGGACGACAAAGUAAGCU  | 313   | 4   | Cleavage    | [ Symbols:   Calcium-dependent lipid-binding (CaLB domain) family protein   chr3:23221845-23222995 REVERSE LENGTH=1151                                                                                                                                  |
| AT3G62840 | UCUAGUUCACAUUUUUCGCGAC  | 427   | 5   | Cleavage    | [ Symbols:   Small nuclear ribonucleoprotein family protein   chr3:23235490-23236816 REVERSE LENGTH=684                                                                                                                                                 |
| AT3G62890 | CUCAACAAGUAUAGGGCUUG    | 110   | 4.5 | Translation | [ Symbols:   Pentatricopeptide repeat (PPR) superfamily protein   chr3:23246157-23248063 FORWARD LENGTH=1823                                                                                                                                            |
| AT3G63070 | UUUGUUAACUCUAGUGCACCC   | 165   | 3   | Translation | [ Symbols:   Tudor/PWWP/MBT domain-containing protein   chr3:23302365-23309658 FORWARD LENGTH=4429                                                                                                                                                      |
| AT3G63130 | AUUGAGCGUCGAGUAUGAGCCU  | 2734  | 5   | Cleavage    | [ Symbols:   RANGAP1, ATRANGAP1   RAN GTPase activating protein 1   chr3:23324621-23326913 FORWARD LENGTH=2040                                                                                                                                          |
| AT3G63180 | UGUGUGUUGUACCUUUAUGUUC  | 106   | 4   | Cleavage    | [ Symbols:   ATTKL1, TKL1   TIC-like   chr3:23336092-23340236 REVERSE LENGTH=3238                                                                                                                                                                       |
| AT3G63290 | UGAGACACAAAGCGAGGAUUC   | 244   | 3.5 | Cleavage    | [ Symbols:   2-oxoglutarate (2OG) and Fe(II)-dependent oxygenase superfamily protein   chr3:23381645-23383434 FORWARD LENGTH=1655                                                                                                                       |
| AT3G63380 | UAGAUAUUAUCUAGUCUUGCGCA | 194   | 3   | Translation | [ Symbols:   ATPase E1-E2 type family protein / haloacid dehalogenase-like hydrolase family protein   chr3:23406611-23410360 REVERSE LENGTH=3750                                                                                                        |
| AT3G63400 | AUAGCUAACAAGAACUUCUUUCU | 426   | 2.5 | Translation | [ Symbols:   Cydophilin-like peptidyl-prolyl cis-trans isomerase family protein   chr3:23412024-23415659 FORWARD LENGTH=1535                                                                                                                            |
| AT3G63430 | UUUGAUCGAGAGUAUGGAU     | 816   | 2.5 | Cleavage    | [ Symbols:   unknown protein; BEST Arabidopsis thaliana protein match is: unknown protein (TAIR:AT1G74160.1); Has 135 Blast hits to 119 proteins in 22 species: Archae - 0; Bacteria - 2; Metazoa - 3; Fungi - 3; Plants - 119; Viruses - 0; Other Euk  |
| AT3G63440 | UAUAGGCGUUGAAGAAGAUUC   | 535   | 2   | Cleavage    | [ Symbols:   ATCKX6, CKX6, ATCKX7   cytokinin oxidase/dehydrogenase 6   chr3:23424157-23426536 FORWARD LENGTH=2007                                                                                                                                      |
| AT3G63520 | UUUAGGAUUGUUGCAUUAUCGA  | 1164  | 3   | Cleavage    | [ Symbols:   CDE1, ATCD1, ATNCD1, NCED1   carotenoid cleavage dioxygenase 1   chr3:23452911-23456078 FORWARD LENGTH=1828                                                                                                                                |
| AT4G00110 | UGUGUAUACAAGGACUGGCGU   | 215   | 3.5 | Translation | [ Symbols:   GAE3   UDP-D-glucuronate 4-epimerase 3   chr4:38504-40189 REVERSE LENGTH=1686                                                                                                                                                              |
| AT4G00225 | UUUGUAUGCAUUAUCUGGGAC   | 135   | 3   | Cleavage    | [ Symbols:   pseudogene, similar to sucrose transporter SUC1, blastp match of 53% identity and 2.0e-09 P-value to GP 28371870 gb AAO38059.1  [AY190281 sucrose transporter SUC1 (Brassica napus)   chr4-92644-93147 REVERSE LENGTH=50                   |
| AT4G00236 | UACAACAAUUCGAGCACUCCUCU | 156   | 3.5 | Cleavage    | [ Symbols:   pseudogene, similar to leaf senescence-associated receptor-like protein kinase, blastp match of 56% identity and 4.7e-52 P-value to GP 9837280 gb AAG00510.1  [AF285172 leaf senescence-associated receptor-like protein kinase (          |
| AT4G00238 | UAGCGGACGUAUUGGCUUUGU   | 875   | 4.5 | Cleavage    | [ Symbols:   DNA-binding storekeeper protein-related transcriptional regulator   chr4:103823-105217 REVERSE LENGTH=1395                                                                                                                                 |
| AT4G00300 | UUUACAUUUCGCGGCUUAGGCA  | 461   | 4   | Cleavage    | [ Symbols:   Fringe-related protein   chr4:126509-130331 FORWARD LENGTH=2563                                                                                                                                                                            |
| AT4G00355 | UUUUCGACGGUUUCUGUAGCC   | 826   | 4.5 | Translation | [ Symbols:   unknown protein; BEST Arabidopsis thaliana protein match is: unknown protein (TAIR:AT2G45980.1); Has 35333 Blast hits to 34131 proteins in 2444 species: Archae - 798; Bacteria - 22429; Metazoa - 974; Fungi - 991; Plants - 531; Vi      |
| AT4G00416 | UAUCUUCAGCGUUUCUGUAGCC  | 826   | 3   | Cleavage    | [ Symbols:   MBD3   methyl-CPG-binding domain 3   chr4:179022-179513 FORWARD LENGTH=492                                                                                                                                                                 |
| AT4G00752 | UUCAGGGUGAAGAACAUAUGACU | 1291  | 3   | Cleavage    | [ Symbols:   UBX domain-containing protein   chr4:317564-320895 REVERSE LENGTH=1719                                                                                                                                                                     |
| AT4G00753 | UUCAGGGUGAAGAACAUAUGACU | 1291  | 3   | Cleavage    | [ Symbols:   Pseudogene of AT5G37890; seven in absentia (SINA) protein, putative   chr4:322364-323033 FORWARD LENGTH=670                                                                                                                                |
| AT4G00760 | UUUAGUUCGCGUUUCUACAGC   | 122   | 4   | Translation | [ Symbols:   APRR8, PRR8   pseudo-response regulator 8   chr4:327025-333477 REVERSE LENGTH=3285                                                                                                                                                         |
| AT4G00970 | CUCAGGCUCAUUCUGAGCUCU   | 968   | 3   | Cleavage    | [ Symbols:   CRK41   cysteine-rich RLK (RECEPTOR-like protein kinase) 41   chr4:418437-421694 FORWARD LENGTH=1998                                                                                                                                       |
| AT4G00980 | UUUGGUAUCUGUAGUUGUGUA   | 152   | 4   | Cleavage    | [ Symbols:   zinc knuckle (CCHC-type) family protein   chr4:422478-424588 REVERSE LENGTH=1729                                                                                                                                                           |
| AT4G01170 | UCUCAUGUAGUUCUAGUUGCGCA | 1437  | 4   | Cleavage    | [ Symbols:   unknown protein; BEST Arabidopsis thaliana protein match is: unknown protein (TAIR:AT3G07730.1); Has 211 Blast hits to 211 proteins in 60 species: Archae - 0; Bacteria - 22; Metazoa - 50; Fungi - 11; Plants - 77; Viruses - 0; Other E  |
| AT4G01200 | CGGAUUCUAGUUGCAUGUGGCU  | 186   | 5   | Cleavage    | [ Symbols:   Calcium-dependent lipid-binding (CaLB domain) family protein   chr4:506511-507626 REVERSE LENGTH=1116                                                                                                                                      |
| AT4G01330 | AAACACUUCUAGACUUGAUUCU  | 123   | 3.5 | Translation | [ Symbols:   Protein kinase superfamily protein   chr4:550420-552941 FORWARD LENGTH=1837                                                                                                                                                                |
| AT4G01550 | UACUGGAGGACGCUACAGCACU  | 949   | 4.5 | Cleavage    | [ Symbols:   anac069, NAC069   NAC domain containing protein 69   chr4:673862-676411 REVERSE LENGTH=1723                                                                                                                                                |
| AT4G01750 | UCGAGGCGAGGAACAUAUGACU  | 334   | 3   | Translation | [ Symbols:   RGXT2   rhamnogalacturonan xylosyltransferase 2   chr4:756363-758590 FORWARD LENGTH=1501                                                                                                                                                   |
| AT4G02050 | UAUUGACUGUGCAUGUAGGCC   | 237   | 4.5 | Cleavage    | [ Symbols:   STP7   sugar transporter protein 7   chr4:898307-900870 REVERSE LENGTH=1819                                                                                                                                                                |
| AT4G02180 | UCCACCGCUGAUGACAUAUUGU  | 1524  | 4.5 | Cleavage    | [ Symbols:   DC1 domain-containing protein   chr4:959964-963517 FORWARD LENGTH=2970                                                                                                                                                                     |
| AT4G02195 | UGAGGACACAGUAUUGUUGUUCU | 1505  | 4.5 | Cleavage    | [ Symbols:   SPY42, TLG28, ATSPY42, ATTLG28   syntaxin of plants 42   chr4:970007-972307 REVERSE LENGTH=1179                                                                                                                                            |
| AT4G02200 | UUUGGUGUCUGAGUUCGCCUCCU | 669   | 3.5 | Cleavage    | [ Symbols:   Drought-responsive family protein   chr4:972707-974692 FORWARD LENGTH=1053                                                                                                                                                                 |
| AT4G02220 | AACAACAAUUCUGAAGCAACGCU | 111   | 3.5 | Translation | [ Symbols:   zinc finger (MYND type) family protein / programmed cell death 2 C-terminal domain-containing protein   chr4:976278-979163 FORWARD LENGTH=1713                                                                                             |
| AT4G02410 | UAUCACUCUUGUUCUAGGAGG   | 223   | 4.5 | Cleavage    | [ Symbols:   Concanavalin A-like lectin protein kinase family protein   chr4:1059889-1062153 REVERSE LENGTH=2265                                                                                                                                        |
| AT4G02430 | UAUCUCUGUCUGUUCAGCAACCU | 295   | 3.5 | Cleavage    | [ Symbols:   SR34b, At-SR34b   RNA-binding (RRM/RBD/RNP motifs) family protein   chr4:1068974-1072183 FORWARD LENGTH=1513                                                                                                                               |
| AT4G02570 | UUUGAGCACUCUUCUGACCGCA  | 154   | 4   | Cleavage    | [ Symbols:   CUL1   cullin 1   chr4:1128515-1133774 FORWARD LENGTH=2793                                                                                                                                                                                 |
| AT4G02660 | UGGCGCUCAACUCUGCAAGGU   | 10625 | 3.5 | Translation | [ Symbols:   Beige/BEACH domain; WD domain, G-beta repeat protein   chr4:1159667-1174321 REVERSE LENGTH=11374                                                                                                                                           |
| AT4G02930 | UCUCAUGUAGUUAUUGUUGCGCA | 1437  | 3.5 | Cleavage    | [ Symbols:   GTP binding Elongation factor Tu family protein   chr4:1295409-1298404 REVERSE LENGTH=1757                                                                                                                                                 |
| AT4G03030 | UCCUUAACAGUCUGAAGAACGCC | 272   | 4.5 | Cleavage    | [ Symbols:   Galactose oxidase/kelch repeat superfamily protein   chr4:1335729-1337368 REVERSE LENGTH=1640                                                                                                                                              |
| AT4G03270 | UGAGACACAAAGCGGAGGAUUC  | 244   | 3.5 | Translation | [ Symbols:   CYCD6;1   Cyclin D6;1   chr4:1432375-1433691 REVERSE LENGTH=909                                                                                                                                                                            |
| AT4G03298 | UAUCUCUGUCUGUUCAGCAACCU | 295   | 3.5 | Cleavage    | [ Symbols:   unknown protein; FUNCTIONS IN: molecular_function unknown; INVOLVED IN: biological_process unknown; LOCATED IN: cellular_component unknown; Has 7 Blast hits to 7 proteins in 2 species: Archae - 0; Bacteria - 0; Metazoa - 0;            |
| AT4G03330 | CAACUCUGUAGUUAUACUAUAG  | 133   | 4   | Cleavage    | [ Symbols:   SYP123, ATSPY123   syntaxin of plants 123   chr4:1466336-1467750 FORWARD LENGTH=1252                                                                                                                                                       |
| AT4G03400 | UGAAUAAAACUGAAGCAACGUCC | 263   | 3   | Cleavage    | [ Symbols:   DFL2, GH3-10   Auxin-responsive GH3 family protein   chr4:1497536-1499865 REVERSE LENGTH=2051                                                                                                                                              |
| AT4G03510 | UGCGGACAGGAUUAUUGUUGCU  | 1505  | 3.5 | Cleavage    | [ Symbols:   RMA1, ATRMA1   RING membrane-anchor 1   chr4:1557120-1559428 REVERSE LENGTH=1632                                                                                                                                                           |
| AT4G03550 | UUUUGAGAGCCUUGUAGUAUAGU | 118   | 2.5 | Cleavage    | [ Symbols:   ATGSL05, GSL05, ATGSL5, PMR4, G5L5   glucan synthase-like 5   chr4:1573348-1579696 FORWARD LENGTH=5835                                                                                                                                     |
| AT4G03695 | UACGCGUUGGUCGCUUACAAGC  | 192   | 4   | Cleavage    | [ Symbols:   pseudogene, hypothetical protein   chr4:1637775-1638582 REVERSE LENGTH=808                                                                                                                                                                 |
| AT4G03820 | UGACACCGAUUCUUGAUUGCAU  | 377   | 4   | Cleavage    | [ Symbols:   Protein of unknown function (DUF3537)   chr4:1771863-1774421 REVERSE LENGTH=1606                                                                                                                                                           |
| AT4G04250 | UUUGAACUUAUGGAUACCUUACU | 227   | 4   | Translation | [ Symbols:   pseudogene, hypothetical protein, contains Pfam profile: PF04642 protein of unknown function, DUF601   chr4:2045957-2048347 REVERSE LENGTH=2391                                                                                            |
| AT4G04404 | UCGAGCACCUACGUACAGCGG   | 100   | 5   | Translation | [ Symbols:   C2H2 and C2HC zinc fingers superfamily protein   chr4:2166973-2167980 FORWARD LENGTH=693                                                                                                                                                   |
| AT4G04570 | UGACGGACAAGUAUUGUUGCU   | 1505  | 4   | Cleavage    | [ Symbols:   CRK40   cysteine-rich RLK (RECEPTOR-like protein kinase) 40   chr4:2289959-2292391 FORWARD LENGTH=1938                                                                                                                                     |
| AT4G04650 | CUCAACAAGUAUAGGGCUUUCU  | 208   | 3   | Cleavage    | [ Symbols:   RNA-directed DNA polymerase (reverse transcriptase)-related family protein   chr4:2353989-2355213 REVERSE LENGTH=999                                                                                                                       |
| AT4G04660 | UGAAUGACAACUUGGACAAGCU  | 583   | 3.5 | Cleavage    | [ Symbols:   pseudogene, hypothetical protein, similar to zinc finger protein (Arabidopsis thaliana) Gi-976277   chr4:2365562-2366755 FORWARD LENGTH=1194                                                                                               |
| AT4G04700 | UUUCUACAGUUGAUUAGGAGCU  | 265   | 3   | Translation | [ Symbols:   CPK27   calcium-dependent protein kinase 27   chr4:2385276-2387986 REVERSE LENGTH=1458                                                                                                                                                     |
| AT4G04745 | UUUAGGAUUGUUGCAUUAUUGU  | 1164  | 4   | Cleavage    | [ Symbols:   unknown protein; BEST Arabidopsis thaliana protein match is: unknown protein (TAIR:AT4G21902.1); Has 32 Blast hits to 32 proteins in 9 species: Archae - 0; Bacteria - 0; Metazoa - 0; Fungi - 0; Plants - 32; Viruses - 0; Other Eukaryot |
| AT4G04800 | UGUACCGCUAGUAUUCUUCUCC  | 123   | 4.5 | Cleavage    | [ Symbols:   ATMSRB3, MSRB3   methionine sulfoxide reductase B3   chr4:2439546-2441205 FORWARD LENGTH=827                                                                                                                                               |
| AT4G05018 | UAUCUCUGUCUGUUCAGCAACCU | 295   | 3   | Translation | [ Symbols:   unknown protein; FUNCTIONS IN: molecular_function unknown; INVOLVED IN: biological_process unknown; LOCATED IN: endomembrane system; BEST Arabidopsis thaliana protein match is: unknown protein (TAIR:AT4G21500.1); H                     |
| AT4G05040 | UGUUAAGAGACUUGAGCCAGC   | 574   | 4.5 | Cleavage    | [ Symbols:   ankyrin repeat family protein   chr4:2578646-2581798 FORWARD LENGTH=1913                                                                                                                                                                   |
| AT4G05090 | UUUGAGAGAUCCCUUGUUAUCUG | 3917  | 3.5 | Cleavage    | [ Symbols:   Inositol monophosphatase family protein   chr4:2609142-2611762 FORWARD LENGTH=1431                                                                                                                                                         |
| AT4G05160 | UUUGAACAGCCUGAUGAAGUUCU | 102   | 3   | Translation | [ Symbols:   AMP-dependent synthetase and ligase family protein   chr4:2664385-2666707 FORWARD LENGTH=1861                                                                                                                                              |
| AT4G05320 | CAACGCUUCUUGAUACAUUUCU  | 133   | 3   | Cleavage    | [ Symbols:   UBQ10   polyubiquitin 10   chr4:2718170-2720308 FORWARD LENGTH=1835                                                                                                                                                                        |
| AT4G05330 | UAUCUUGCGCGUUCUUCUAGAC  | 300   | 3.5 | Translation | [ Symbols:   AGD13   ARF-GAP domain 13   chr4:2720561-2723125 REVERSE LENGTH=1322                                                                                                                                                                       |
| AT4G05360 | UCAACACUUCUAGUACAUUAG   | 143   | 3.5 | Cleavage    | [ Symbols:   Zinc knuckle (CCHC-type) family protein   chr4:2728204-2732337 FORWARD LENGTH=2208                                                                                                                                                         |
| AT4G05420 | UAUUGAGUGGACGACUACUUCU  | 200   | 3.5 | Translation | [ Symbols:   DDB1A   damaged DNA binding protein 1A   chr4:2746122-2752896 FORWARD LENGTH=3603                                                                                                                                                          |
| AT4G05500 | ACAAACUGUUGAAGCAAGCCU   | 1107  | 3.5 | Cleavage    | [ Symbols:   pseudogene, F-box protein family, AtFBL9/AtFBL23, contains similarity to N7 protein Gi-3273101 from (Medicago truncatula); blastp match of 39% identity and 1.6e-34 P-value to GP 3273101 emb CAA76808.1  Y17613 N7 protein                |
| AT4G05540 | UUUGAGGACUUCACCGACGCU   | 261   | 4.5 | Translation | [ Symbols:   P-loop containing nucleoside triphosphate hydrolases superfamily protein   chr4:2818776-2821065 REVERSE LENGTH=2070                                                                                                                        |
| AT4G06534 | UAUGGCGUGGGAGCAUACGCCA  | 299   | 3.5 | Cleavage    | [ Symbols:   unknown protein; FUNCTIONS IN: molecular_function unknown; INVOLVED IN: biological_process unknown; LOCATED IN: endomembrane system; Has 22 Blast hits to 22 proteins in 8 species: Archae - 0; Bacteria - 0; Metazoa - 0; Fur             |
| AT4G07320 | UCUAGUUGCAUUAUUUUGGAC   | 421   | 3.5 | Cleavage    | [ Symbols:   pseudogene, hypothetical protein   chr4:4115732-4119835 REVERSE LENGTH=4104                                                                                                                                                                |
| AT4G07868 | UUGAGCGCCUACUUAUUGAGA   | 679   | 2.5 | Cleavage    | [ Symbols:   unknown protein; FUNCTIONS IN: molecular_function unknown; INVOLVED IN: biological_process unknown; LOCATED IN: endomembrane system; Has 30201 Blast hits to 17322 proteins in 780 species: Archae - 12; Bacteria - 1396; N                |
| AT4G07960 | CUCGGAGAAGAGAGAAGGCU    | 259   | 3   | Cleavage    | [ Symbols:   ATCSLC12, CLS12   Cellulose-synthase-like C12   chr4:4802341-4805647 REVERSE LENGTH=2622                                                                                                                                                   |
| AT4G07990 | CCUGAGCUCUAGUACGACGCU   | 270   | 4.5 | Translation | [ Symbols:   Chaperone DnaJ-domain superfamily protein   chr4:4825409-4829136 REVERSE LENGTH=1133                                                                                                                                                       |
| AT4G08210 | UUUGAGAGAUCCCUUGUUAUCUG | 632   | 3.5 | Cleavage    | [ Symbols:   Pentatricopeptide repeat (PPR-like) superfamily protein   chr4:5183813-5185873 REVERSE LENGTH=2061                                                                                                                                         |
| AT4G08310 | UGAAGGAUUGUGUGUUAACCA   | 474   | 2.5 | Cleavage    | [ Symbols:   FUNCTIONS IN: molecular_function unknown; INVOLVED IN: biological_process unknown; LOCATED IN: cellular_component unknown; EXPRESSED IN: 25 plant structures; EXPRESSED DURING: 13 growth stages; CONTAINS InterPro Di                     |
| AT4G08500 | UGCACCACUUGUUGAAGUACU   | 121   | 5   | Cleavage    | [ Symbols:   MEK1, ATMEK1, MAPKKK8, ARAKIN   MAPK/ERK kinase kinase 1   chr4:5403753-5407301 REVERSE LENGTH=2490                                                                                                                                        |
| AT4G08580 | UUUAAAACCGAGGACUUAUUGC  | 115   | 3.5 | Translation | [ Symbols:   microfilament-associated protein-related   chr4:5461483-5463907 FORWARD LENGTH=1595                                                                                                                                                        |
| AT4G08645 | UGACGCGCAUUCUGAAGAUUUU  | 154   | 3   | Translation | [ Symbols:   pseudogene, hypothetical protein   chr4:5514498-5515676 REVERSE LENGTH=1179                                                                                                                                                                |
| AT4G08810 | UAUCCCAACUUGAUAUUCUUCU  | 127   | 4.5 | Cleavage    | [ Symbols:   SUB1   calcium ion binding   chr4:5616052-5617939 REVERSE LENGTH=1888                                                                                                                                                                      |
| AT4G09040 | CUUCCCCUAGAUUUUUUCCUCC  | 401   | 3.5 | Cleavage    | [ Symbols:   RNA-binding (RRM/RBD/RNP motifs) family protein   chr4:5794530-5797375 REVERSE LENGTH=1384                                                                                                                                                 |
| AT4G09200 | CUUGGAGGAGAUUAGACGCGCC  | 513   | 5   | Cleavage    | [ Symbols:   SPlA/Ryanodine receptor (SPRY) domain-containing protein   chr4:5859257-5861803 FORWARD LENGTH=1449                                                                                                                                        |
| AT4G09220 | AAAGUACAAGACCCACCUUCU   | 201   | 3.5 | Cleavage    | [ Symbols:   unknown protein; BEST Arabidopsis thaliana protein match is: unknown protein (TAIR:AT4G09270.1); Has 85 Blast hits to 85 proteins in 21 species: Archae - 0; Bacteria - 5; Metazoa - 52; Fungi - 7; Plants - 14; Viruses - 0; Other Eukary |
| AT4G09250 | CUUGGAGGAGAUUAGACGCGCC  | 513   | 5   | Cleavage    | [ Symbols:   SPlA/Ryanodine receptor (SPRY) domain-containing protein   chr4:5876578-5878978 FORWARD LENGTH=1159                                                                                                                                        |
| AT4G09310 | CUUGGAGGAGAUUAGACGCGCC  | 513   | 5   | Cleavage    | [ Symbols:   SPlA/Ryanodine receptor (SPRY) domain-containing protein   chr4:5902826-5905372 FORWARD LENGTH=1449                                                                                                                                        |

|           |                        |       |     |             |                                                                                                                                                                                                                                                                     |
|-----------|------------------------|-------|-----|-------------|---------------------------------------------------------------------------------------------------------------------------------------------------------------------------------------------------------------------------------------------------------------------|
| AT4G09340 | UACGCGACCGGGUGUCGGCC   | 119   | 5   | Cleavage    | [ Symbols:   SP1a/Ryanodine receptor (SPRY) domain-containing protein   chr4:5924602-5927635 REVERSE LENGTH=1795                                                                                                                                                    |
| AT4G09630 | UAAACUUGAACCAUGCUUAGAA | 302   | 3.5 | Cleavage    | [ Symbols:   Protein of unknown function (DUF616)   chr4:6083713-6088134 FORWARD LENGTH=2615                                                                                                                                                                        |
| AT4G09740 | UGGCGGCUAACUCUGCAAGGU  | 10625 | 5   | Cleavage    | [ Symbols:   Symbols: ATGH9B14, GH9B14   glycosyl hydrolase 9B14   chr4:6142706-6145003 REVERSE LENGTH=1437                                                                                                                                                         |
| AT4G09790 | CAUCAAGAACCGGUUAGCCU   | 125   | 3.5 | Cleavage    | [ Symbols:   pseudogene of the F-box family protein   chr4:6163414-6164655 REVERSE LENGTH=1242                                                                                                                                                                      |
| AT4G09810 | UACAGAAUAGGCUUAGUAAC   | 189   | 4   | Cleavage    | [ Symbols:   Nucleotide-sugar transporter family protein   chr4:6175176-6177293 REVERSE LENGTH=1388                                                                                                                                                                 |
| AT4G09940 | UCACCAUUGGCGAGCUUGUACC | 187   | 3.5 | Cleavage    | [ Symbols:   P-loop containing nucleoside triphosphate superfamily protein   chr4:6231786-6233397 FORWARD LENGTH=1185                                                                                                                                               |
| AT4G10130 | UAGAAUUAUCAUGCUUGGCA   | 194   | 4.5 | Cleavage    | [ Symbols:   DNAI1 heat shock N-terminal domain-containing protein   chr4:6320634-6321643 REVERSE LENGTH=1010                                                                                                                                                       |
| AT4G10170 | UUCGCCUUAAGAUUUCUCCU   | 1646  | 4.5 | Cleavage    | [ Symbols:   SHARE-like superfamily protein   chr4:6344374-6345537 FORWARD LENGTH=1030                                                                                                                                                                              |
| AT4G10320 | CCGAUUCUGAUUGCUUGUGGU  | 186   | 5   | Cleavage    | [ Symbols:   YRNA synthetase class I (L, L, M and V) family protein   chr4:6397330-6404596 REVERSE LENGTH=3856                                                                                                                                                      |
| AT4G10360 | UACACAAGGGGCCUUCUGGACC | 211   | 3.5 | Cleavage    | [ Symbols:   TRAM, LAG1 and CLN8 (TLC) lipid-sensing domain containing protein   chr4:6420455-6422299 FORWARD LENGTH=1090                                                                                                                                           |
| AT4G10457 | UUCGCCUUAAGAUUUCUCCU   | 1646  | 4.5 | Cleavage    | [ Symbols:   Symbols: SCRL1   SCR-like 1   chr4:6466900-6467270 REVERSE LENGTH=279                                                                                                                                                                                  |
| AT4G10470 | UCAAAGACACUUGGCGCCUAGA | 152   | 3.5 | Cleavage    | [ Symbols:   Symbols:   unknown protein match; BEST Arabidopsis thaliana protein match is: unknown protein (TAIR:AT1G33050.2); Has 30201 Blast hits to 17322 proteins in 780 species: Archae - 12; Bacteria - 1396; Metazoa - 17338; Fungi - 3422; Plants - 5037; v |
| AT4G10570 | CAAAUCGGACAGCUACUGCU   | 324   | 5   | Cleavage    | [ Symbols:   Symbols: UBP9   ubiquitin-specific protease 9   chr4:6523255-6528173 REVERSE LENGTH=3289                                                                                                                                                               |
| AT4G10655 | UACCCGUAGCUGCCUACAAG   | 192   | 5   | Cleavage    | [ Symbols:   Symbols:   Encodes a defensin-like (DEFL) family protein.   chr4:6578839-6579024 FORWARD LENGTH=186                                                                                                                                                    |
| AT4G10740 | UCUUAUGCCAAUGUACUACU   | 106   | 4   | Cleavage    | [ Symbols:   Symbols:   F-box and associated interaction domains-containing protein   chr4:6617143-6618426 REVERSE LENGTH=1284                                                                                                                                      |
| AT4G10760 | CUCACAAGGUAUUAAGGCGUU  | 208   | 4   | Translation | [ Symbols:   Symbols: EMB1706, MTA   mRNAadenosine methylase   chr4:6619817-6623351 REVERSE LENGTH=2227                                                                                                                                                             |
| AT4G10920 | UGAGACACACAGGAGAUUUC   | 244   | 3.5 | Cleavage    | [ Symbols:   Symbols: KELP   transcriptional coactivator p15 (PC4) family protein (KELP)   chr4:6696712-6699199 REVERSE LENGTH=1208                                                                                                                                 |
| AT4G11000 | UCGGUCUCAAACUAAACGCU   | 129   | 4   | Cleavage    | [ Symbols:   Symbols:   Ankyrin repeat family protein   chr4:6731020-6732464 FORWARD LENGTH=1221                                                                                                                                                                    |
| AT4G11110 | UAUAAGGAGAGUACGACUUC   | 298   | 4   | Cleavage    | [ Symbols:   Symbols: SP2A   SPA1-related 2   chr4:6771605-6777225 FORWARD LENGTH=3964                                                                                                                                                                              |
| AT4G11150 | CUUCGACUGAGGUAAAGCCCU  | 234   | 5   | Cleavage    | [ Symbols:   Symbols: TUF, emb2448, TUFF, VHA-E1   vacuolar ATP synthase subunit E1   chr4:6799935-6801932 FORWARD LENGTH=1085                                                                                                                                      |
| AT4G11175 | UUUUGCUUAGACUUAAGAAUC  | 179   | 4   | Cleavage    | [ Symbols:   Symbols:   Nucleic acid-binding, OB-fold-like protein   chr4:6818087-6819042 FORWARD LENGTH=734                                                                                                                                                        |
| AT4G11350 | UAAUAAAGGAGAGUACGACU   | 298   | 4   | Cleavage    | [ Symbols:   Symbols:   Protein of unknown function (DUF604)   chr4:6901682-6904225 FORWARD LENGTH=2467                                                                                                                                                             |
| AT4G11380 | UGAAUUCUGGUACACUGGACC  | 197   | 4   | Cleavage    | [ Symbols:   Symbols:   Adaptin family protein   chr4:6920489-6925576 FORWARD LENGTH=3002                                                                                                                                                                           |
| AT4G11393 | UCUAGUUCGCUUUUUCAGAC   | 163   | 3.5 | Cleavage    | [ Symbols:   Symbols:   Defensin-like (DEFL) family protein   chr4:6932370-6932718 FORWARD LENGTH=237                                                                                                                                                               |
| AT4G11440 | UGAAUUCUGGUACACUGGACC  | 197   | 3.5 | Cleavage    | [ Symbols:   Symbols:   Mitochondrial substrate carrier family protein   chr4:6955601-6958553 FORWARD LENGTH=2038                                                                                                                                                   |
| AT4G11500 | UGAGAACGCGUCGCCAUUGGA  | 158   | 3.5 | Cleavage    | [ Symbols:   Symbols:   pseudogene, similar to putative receptor-like serine-threonine protein kinase, blastp match of 59% identity and 6.5e-66 P-value to GP 18076583 emb CAC84552.1  AJ306626 putative receptor-like serine-threonine protein kinase [            |
| AT4G11730 | UACCCGAGGACGUAACACCC   | 302   | 4.5 | Cleavage    | [ Symbols:   Symbols:   Cation transporter/ E1-E2 ATPase family protein   chr4:7067035-7070968 FORWARD LENGTH=2442                                                                                                                                                  |
| AT4G11800 | UUUGGUUCUGAGUCCGCCCU   | 669   | 3.5 | Cleavage    | [ Symbols:   Symbols:   Calciuneurin-like metallo-phosphoesterase superfamily protein   chr4:7093542-7099697 REVERSE LENGTH=3540                                                                                                                                    |
| AT4G11900 | UUGAGGACACUCCACCGACU   | 261   | 4.5 | Cleavage    | [ Symbols:   Symbols:   S-locus lectin protein kinase family protein   chr4:7150241-7153571 REVERSE LENGTH=2579                                                                                                                                                     |
| AT4G11940 | UGCUCGUUAUUAUCCUCCU    | 194   | 3   | Cleavage    | [ Symbols:   Symbols:   unknown protein; BEST Arabidopsis thaliana protein match is: unknown protein (TAIR:AT4G11930.1); Has 37 Blast hits to 37 proteins in 3 species: Archae - 0; Bacteria - 0; Metazoa - 0; Fungi - 0; Plants - 37; Viruses - 0; Other Eukaryot  |
| AT4G11960 | UCGAGUAUGAGCCUGAGUAGU  | 250   | 4.5 | Cleavage    | [ Symbols:   Symbols:   PGR1B   PGR5-like B   chr4:7174903-7177805 REVERSE LENGTH=1433                                                                                                                                                                              |
| AT4G11970 | GCAAGUGAUGUAAAAAGACA   | 100   | 4.5 | Cleavage    | [ Symbols:   Symbols:   YTH family protein   chr4:7180437-7183677 FORWARD LENGTH=1871                                                                                                                                                                               |
| AT4G12080 | UGACGGAAGCUACAGGAUGU   | 108   | 4   | Translation | [ Symbols:   Symbols:   AHL1, ATAH1   AT-hook motif nuclear-localized protein 1   chr4:7239219-7241494 FORWARD LENGTH=1566                                                                                                                                          |
| AT4G12150 | CUUUGACUACUAGAUUUCU    | 119   | 3.5 | Cleavage    | [ Symbols:   Symbols:   RING/U-box superfamily protein   chr4:7268837-7270267 REVERSE LENGTH=1074                                                                                                                                                                   |
| AT4G12400 | UCGGUAGUAUUAUAAACUUC   | 281   | 3.5 | Translation | [ Symbols:   Symbols:   Hop3   stress-inducible protein, putative   chr4:7338659-7341361 REVERSE LENGTH=2006                                                                                                                                                        |
| AT4G12410 | AUUGUGUAUUAUUAUGAGCCU  | 108   | 3.5 | Cleavage    | [ Symbols:   Symbols:   SAUR-like auxin-responsive protein family   chr4:7342956-7343590 REVERSE LENGTH=635                                                                                                                                                         |
| AT4G12450 | UACUGGAGGACGUACGACU    | 949   | 5   | Cleavage    | [ Symbols:   Symbols:   unknown protein; BEST Arabidopsis thaliana protein match is: unknown protein (TAIR:AT2G2560.1); Has 380 Blast hits to 380 proteins in 23 species: Archae - 0; Bacteria - 0; Metazoa - 1; Fungi - 4; Plants - 374; Viruses - 0; Other Euk    |
| AT4G12640 | UAAGCAUUAUUGAUUACCGGA  | 285   | 4   | Cleavage    | [ Symbols:   Symbols:   RNA recognition motif (RRM)-containing protein   chr4:7462599-7467862 FORWARD LENGTH=2802                                                                                                                                                   |
| AT4G12700 | UAUGGCGUAGGAGCAUAGCU   | 299   | 4   | Translation | [ Symbols:   Symbols:   unknown protein; BEST Arabidopsis thaliana protein match is: unknown protein (TAIR:AT2G04280.1); Has 136 Blast hits to 136 proteins in 17 species: Archae - 0; Bacteria - 0; Metazoa - 0; Fungi - 0; Plants - 125; Viruses - 0; Other Euk   |
| AT4G12860 | UACUGUAGUACGAGUAUCCU   | 768   | 3.5 | Cleavage    | [ Symbols:   Symbols:   UNE14   EF-hand calcium-binding protein family   chr4:7538444-7538902 REVERSE LENGTH=459                                                                                                                                                    |
| AT4G12940 | UCGAGUAUGCCUGAGUAGU    | 250   | 4.5 | Cleavage    | [ Symbols:   Symbols:   unknown protein; FUNCTIONS IN: molecular_function unknown; INVOLVED IN: biological_process unknown; LOCATED IN: endomembrane system; BEST Arabidopsis thaliana protein match is: unknown protein (TAIR:AT4G12930.1); H                      |
| AT4G12970 | UAACUUCUAGCCUUGACUCCG  | 727   | 5   | Translation | [ Symbols:   Symbols:   STOMAGEN, EPFL9   stomagen   chr4:7586143-7586849 REVERSE LENGTH=461                                                                                                                                                                        |
| AT4G13262 | UAUGGAGGACUAGCUUACUCC  | 142   | 3   | Translation | [ Symbols:   Symbols:   pseudogene, Phosphoribosylanthranilate transferase, similar to Phosphoribosylanthranilate transferase; blastp match of 28% identity and 1.1e-27 P-value to GP 1396054 dbj BAAI3032.1  D86180 phosphoribosylanthranilate trans               |
| AT4G13460 | UCACUUCUGUCGAAUAGUACC  | 138   | 3   | Cleavage    | [ Symbols:   Symbols:   SDG22, SUVH9, SET2   SUJ(VAR)3-9 homolog 9   chr4:7824034-7826604 REVERSE LENGTH=2534                                                                                                                                                       |
| AT4G13570 | UAGAUAUUAUUGCUUGGCA    | 194   | 4   | Translation | [ Symbols:   Symbols:   HTA4   histone H2A 4   chr4:7884516-7885982 FORWARD LENGTH=759                                                                                                                                                                              |
| AT4G13580 | UUAUACACGAACUUCUGGCG   | 310   | 3.5 | Cleavage    | [ Symbols:   Symbols:   Disease resistance-responsive (dirigent-like protein) family protein   chr4:7900374-7901328 FORWARD LENGTH=955                                                                                                                              |
| AT4G13650 | UUUGAGCAGCUACACAGCAGG  | 162   | 5   | Translation | [ Symbols:   Symbols:   Pentatricopeptide repeat (PPR) superfamily protein   chr4:7938967-7942898 REVERSE LENGTH=3839                                                                                                                                               |
| AT4G13820 | UUUCUUGGACUUGAGUAGGACU | 102   | 4   | Cleavage    | [ Symbols:   Symbols:   Leucine-rich repeat (LRR) family protein   chr4:8007989-8010745 REVERSE LENGTH=2757                                                                                                                                                         |
| AT4G13920 | UUGCGGACUGGAUAGGACUAG  | 101   | 4   | Translation | [ Symbols:   Symbols:   ATRP50, RLPS0   receptor like protein 50   chr4:8043803-8046559 FORWARD LENGTH=2757                                                                                                                                                         |
| AT4G13930 | UAGGCGUGAGAUUUGGACGCU  | 875   | 2.5 | Cleavage    | [ Symbols:   Symbols:   SHM4   serine hydroxymethyltransferase 4   chr4:8047692-8050106 REVERSE LENGTH=1822                                                                                                                                                         |
| AT4G13970 | ACAAACUGUUAUGAACAGCCU  | 1107  | 4   | Cleavage    | [ Symbols:   Symbols:   zinc ion binding   chr4:8070189-8075501 REVERSE LENGTH=2935                                                                                                                                                                                 |
| AT4G14060 | UACGAGACUUCUAGCCGACU   | 307   | 5   | Cleavage    | [ Symbols:   Symbols:   Polyketide cyclase/dehydrase and lipid transport superfamily protein   chr4:8107337-8108307 FORWARD LENGTH=673                                                                                                                              |
| AT4G14145 | UAAACUUGAACCAUGCUUAGA  | 302   | 3.5 | Translation | [ Symbols:   Symbols:   unknown protein; FUNCTIONS IN: molecular_function unknown; INVOLVED IN: biological_process unknown; LOCATED IN: chloroplast; Has 30201 Blast hits to 17322 proteins in 780 species: Archae - 12; Bacteria - 1396; Metazoa - 173             |
| AT4G14150 | CAAAUCUGGACAGCUACUGCU  | 324   | 4   | Cleavage    | [ Symbols:   Symbols:   PAKRFP, KINESIN-12A   phragmoplast-associated kinesin-related protein 1   chr4:8158572-8159008 REVERSE LENGTH=3952                                                                                                                          |
| AT4G14240 | UCUUGGUGUUGCAUUAUGAACU | 189   | 4.5 | Cleavage    | [ Symbols:   Symbols:   CBS domain-containing protein with a domain of unknown function (DUF71)   chr4:8204347-8207408 REVERSE LENGTH=1985                                                                                                                          |
| AT4G14280 | UUUAGGAUUGUUGUAUGCA    | 1164  | 2.5 | Cleavage    | [ Symbols:   Symbols:   ARM repeat superfamily protein   chr4:8222518-8225185 FORWARD LENGTH=2508                                                                                                                                                                   |
| AT4G14310 | CAAAUUCGAGAACUUCUAGC   | 283   | 3   | Cleavage    | [ Symbols:   Symbols:   Transducin/WD40 repeat-like superfamily protein   chr4:8236759-8240324 REVERSE LENGTH=2977                                                                                                                                                  |
| AT4G14400 | UCUAGUUCGGGUUCUUCAGAC  | 300   | 4   | Cleavage    | [ Symbols:   Symbols:   ACDE   ankyrin repeat family protein   chr4:8294446-8298602 FORWARD LENGTH=2271                                                                                                                                                             |
| AT4G14430 | AACAACUUGUUGAAGAACCAAC | 111   | 4   | Cleavage    | [ Symbols:   Symbols:   IBR10, ATEC12, EC12, ECHIB, PEC12   indole-3-butyric acid response 10   chr4:8304600-8305705 REVERSE LENGTH=1106                                                                                                                            |
| AT4G14740 | UUGAGAUUCCCGUUAUCUGU   | 3917  | 4   | Translation | [ Symbols:   Symbols:   Plant protein of unknown function (DUF828) with plant pleckstrin homology-like region   chr4:8450292-8453085 REVERSE LENGTH=1692                                                                                                            |
| AT4G14820 | UGAGAUUGCUUAGAGGAAAGAG | 101   | 2.5 | Translation | [ Symbols:   Symbols:   Pentatricopeptide repeat (PPR) superfamily protein   chr4:8507794-8510038 REVERSE LENGTH=2169                                                                                                                                               |
| AT4G14900 | UUUGAUUACCCGUAUAAACU   | 175   | 3.5 | Cleavage    | [ Symbols:   Symbols:   FRIGIDA-like protein   chr4:8521522-8523705 REVERSE LENGTH=1934                                                                                                                                                                             |
| AT4G14970 | UUGGAGGAGUAUAGCGCGCC   | 4887  | 4   | Cleavage    | [ Symbols:   Symbols:   unknown protein; FUNCTIONS IN: molecular_function unknown; INVOLVED IN: biological_process unknown; LOCATED IN: chloroplast; EXPRESSED IN: 14 plant structures; EXPRESSED DURING: 6 growth stages; Has 257 Blast hits to 16                 |
| AT4G15165 | UUGACGACCAUCGCGCUCCU   | 170   | 4.5 | Cleavage    | [ Symbols:   Symbols:   N-terminal nucleophile aminohydrolases (Ntn hydrolases) superfamily protein   chr4:8648832-8650382 FORWARD LENGTH=908                                                                                                                       |
| AT4G15210 | UUUGGACUACUUGCUUGCAAG  | 1274  | 4   | Cleavage    | [ Symbols:   Symbols:   ATBETA-AMY, AT-BETA-AMY, RAM1   beta-amylase 5   chr4:8666338-8669470 REVERSE LENGTH=1890                                                                                                                                                   |
| AT4G15215 | UCACCAUUGGCGAGCUUGUACC | 187   | 4   | Translation | [ Symbols:   Symbols:   PDR13, ATPDR13   pleiotropic drug resistance 13   chr4:8672070-8679176 FORWARD LENGTH=4475                                                                                                                                                  |
| AT4G15230 | UCACCAUUGGCGAGCUUGUACC | 187   | 3   | Cleavage    | [ Symbols:   Symbols:   ATPDR2, PDR2   pleiotropic drug resistance 2   chr4:8680182-8686880 FORWARD LENGTH=4316                                                                                                                                                     |
| AT4G15236 | UUCGGAUUGGUGAAGAAGU    | 113   | 4   | Cleavage    | [ Symbols:   Symbols:   ABC-2 and Plant PDR ABC-type transporter family protein   chr4:8696863-8702727 FORWARD LENGTH=4167                                                                                                                                          |
| AT4G15430 | UACGAGGUGAGUAUAGGACU   | 2734  | 4.5 | Cleavage    | [ Symbols:   Symbols:   ERD (early-responsive to dehydration stress) family protein   chr4:8827876-8831504 FORWARD LENGTH=2585                                                                                                                                      |
| AT4G15475 | CACAUACACGAGGCGACUUG   | 198   | 3.5 | Cleavage    | [ Symbols:   Symbols:   F-box/RNase superfamily protein   chr4:8845875-8848869 FORWARD LENGTH=2053                                                                                                                                                                  |
| AT4G15500 | CUUUAACGACUUCUUGGCGCC  | 290   | 3.5 | Cleavage    | [ Symbols:   Symbols:   UGT8444   UDP-glycosyltransferase superfamily protein   chr4:8856988-8858572 REVERSE LENGTH=1585                                                                                                                                            |
| AT4G15550 | UCUGUACCGUGAUUUCUUC    | 275   | 5   | Cleavage    | [ Symbols:   Symbols:   IAGL1   indole-3-acetate beta-D-glucosyltransferase   chr4:8877590-8879327 REVERSE LENGTH=1738                                                                                                                                              |
| AT4G15730 | UACCGUAGGAGAUUUAUUGCC  | 122   | 4   | Cleavage    | [ Symbols:   Symbols:   CW-type Zinc Finger   chr4:8951533-8957632 REVERSE LENGTH=3952                                                                                                                                                                              |
| AT4G15740 | UCAUGUAGUUCUAGUUGCCU   | 245   | 4   | Cleavage    | [ Symbols:   Symbols:   Calcium-dependent lipid-binding (CaLB domain) family protein   chr4:8964745-8966318 REVERSE LENGTH=1574                                                                                                                                     |
| AT4G15765 | UGUGGUUACCUUUAUUGCU    | 106   | 5   | Cleavage    | [ Symbols:   Symbols:   FAD/NAD(P)-binding oxidoreductase family protein   chr4:8975404-8977211 REVERSE LENGTH=1195                                                                                                                                                 |
| AT4G15810 | UUUGUUAACUUGGUGUACCC   | 165   | 4   | Cleavage    | [ Symbols:   Symbols:   P-loop containing nucleoside triphosphate hydrolases superfamily protein   chr4:8989162-8992591 REVERSE LENGTH=2757                                                                                                                         |
| AT4G15840 | UGACACCGAUUCUGAUAGCUU  | 823   | 4   | Cleavage    | [ Symbols:   Symbols:   BTB/POZ domain-containing protein   chr4:8996912-9001039 FORWARD LENGTH=2749                                                                                                                                                                |
| AT4G16030 | UUGACCGGAGGAGUAGGACU   | 330   | 4.5 | Cleavage    | [ Symbols:   Symbols:   Ribosomal protein L19e family protein   chr4:9083447-9084727 FORWARD LENGTH=1004                                                                                                                                                            |
| AT4G16050 | UUGCAGAGUAGGAUUAACAC   | 101   | 3.5 | Translation | [ Symbols:   Symbols:   Aminotransferase-like, plant mobile domain family protein   chr4:9092226-9094357 FORWARD LENGTH=2132                                                                                                                                        |
| AT4G16070 | UGGAUUCGGGCGUACUUAUC   | 392   | 4   | Cleavage    | [ Symbols:   Symbols:   Mono-/di-acylglycerol lipase, N-terminal; Lipase, class 3   chr4:9096730-9100841 REVERSE LENGTH=2288                                                                                                                                        |
| AT4G16150 | UGAAGGAUUGUGGUUAACCA   | 474   | 4   | Cleavage    | [ Symbols:   Symbols:   calmodulin binding;transcription regulators   chr4:9148059-9153292 FORWARD LENGTH=3182                                                                                                                                                      |
| AT4G16155 | UCACCAUUGGCGAGCUUGUACC | 187   | 2   | Translation | [ Symbols:   Symbols:   dihydrolipoyl dehydrogenases   chr4:9153363-9157322 REVERSE LENGTH=2100                                                                                                                                                                     |
| AT4G16280 | AUGACGAAUUGUUGACGCGCU  | 113   | 4.5 | Cleavage    | [ Symbols:   Symbols:   FCA   RNA binding;abscisic acid binding   chr4:9207164-9214825 REVERSE LENGTH=4732                                                                                                                                                          |
| AT4G16350 | UUUCUGACGGAAGAUAAGCU   | 313   | 3.5 | Translation | [ Symbols:   Symbols:   CBLE, SCABP2   calcineurin B-like protein 6   chr4:9242320-9243912 REVERSE LENGTH=930                                                                                                                                                       |
| AT4G16470 | UUUGGUUGGCCAUUCUGCGG   | 147   | 3.5 | Cleavage    | [ Symbols:   Symbols:   Tetraatricopeptide repeat (TPR)-like superfamily protein   chr4:9287862-9289582 REVERSE LENGTH=1547                                                                                                                                         |
| AT4G16563 | UUGGAGAACUCCUUGACCGGA  | 1272  | 4.5 | Cleavage    | [ Symbols:   Symbols:   Eukaryotic aspartyl protease family protein   chr4:9296557-9315123 REVERSE LENGTH=1867                                                                                                                                                      |
| AT4G16610 | UUCGCAACUUAUGAUGAACU   | 3     | 3   | Cleavage    | [ Symbols:   Symbols:   CZH2-like zinc finger protein   chr4:9354321-9355287 REVERSE LENGTH=967                                                                                                                                                                     |
| AT4G16620 | UGUCCCAACUUAUCUACCCU   | 279   | 4.5 | Cleavage    | [ Symbols:   Symbols:   nodulin MTN21/EamA-like transporter family protein   chr4:9358117-9360060 REVERSE LENGTH=1337                                                                                                                                               |
| AT4G16807 | UUUGUAUGCAUUAUCUGGGAC  | 135   | 3   | Cleavage    | [ Symbols:   Symbols:   unknown protein; FUNCTIONS IN: molecular_function unknown; INVOLVED IN: biological_process unknown; LOCATED IN: cellular_component unknown; BEST Arabidopsis thaliana protein match is: unknown protein (TAIR:AT3G3552                      |

|           |                         |      |     |             |                                                                                                                                                                                                                                                       |
|-----------|-------------------------|------|-----|-------------|-------------------------------------------------------------------------------------------------------------------------------------------------------------------------------------------------------------------------------------------------------|
| AT4G16860 | UUGAAAGACUUGUGGAUACCC   | 926  | 4   | Cleavage    | Symbols: RPP4   Disease resistance protein (TIR-NBS-LRR class) family   chr4:9488466-9495816 REVERSE LENGTH=3678                                                                                                                                      |
| AT4G16900 | UUGGCCUGAGGUUGGACGCCU   | 272  | 4   | Translation | Symbols:   Disease resistance protein (TIR-NBS-LRR class) family   chr4:9511859-9516541 REVERSE LENGTH=3517                                                                                                                                           |
| AT4G16940 | UUAUAUCAAUGUAGUCAGCU    | 2805 | 4   | Translation | Symbols:   Disease resistance protein (TIR-NBS-LRR class) family   chr4:9533149-9537604 REVERSE LENGTH=3538                                                                                                                                           |
| AT4G16960 | UUAUAUCAAUGUAGUCAGCU    | 2805 | 4   | Translation | Symbols:   Disease resistance protein (TIR-NBS-LRR class) family   chr4:9546343-9551007 REVERSE LENGTH=3126                                                                                                                                           |
| AT4G17140 | UGUGGUUAGUACUUAUCUGCU   | 106  | 3.5 | Translation | Symbols:   plectstrin homology (PH) domain-containing protein   chr4:9613330-9636873 REVERSE LENGTH=13193                                                                                                                                             |
| AT4G17250 | UUUAUUACACAGUGGACUGUG   | 118  | 4.5 | Translation | Symbols:   unknown protein; FUNCTIONS IN: molecular_function unknown; INVOLVED IN: heat acclimation; LOCATED IN: cellular_component unknown; EXPRESSED IN: 12 plant structures; EXPRESSED DURING: 7 growth stages; BEST Arabidopsis                   |
| AT4G17260 | AUGGAUUUAGAUACUUGCGGCU  | 196  | 4.5 | Cleavage    | Symbols:   Lactate/malate dehydrogenase family protein   chr4:9673991-9675448 FORWARD LENGTH=1267                                                                                                                                                     |
| AT4G17270 | UUUUAUACGACAGAAUAGCU    | 313  | 3.5 | Cleavage    | Symbols:   Mo25 family protein   chr4:9676127-9678777 FORWARD LENGTH=1520                                                                                                                                                                             |
| AT4G17483 | UUUAACCAUUAUGUUCUUGCU   | 1055 | 4   | Cleavage    | Symbols:   alpha/beta-Hydrolases superfamily protein   chr4:9747344-9748892 REVERSE LENGTH=934                                                                                                                                                        |
| AT4G17610 | UUAACAUGUCCGGCUAGGCA    | 461  | 2   | Cleavage    | Symbols:   tRNA/RNA methyltransferase (SpoU) family protein   chr4:9805513-9814910 REVERSE LENGTH=5692                                                                                                                                                |
| AT4G17616 | CUUGGACUACAAUUAUACU     | 1059 | 5   | Cleavage    | Symbols:   Pentatricopeptide repeat (PPR) superfamily protein   chr4:9819498-9821684 FORWARD LENGTH=2187                                                                                                                                              |
| AT4G18100 | ACAAACUUGUUAUACAAGCCU   | 1107 | 4.5 | Cleavage    | Symbols:   Ribosomal protein L32e   chr4:10035485-10036541 REVERSE LENGTH=698                                                                                                                                                                         |
| AT4G18120 | UUGAUCCAUGUAGUCAGACU    | 4031 | 4   | Cleavage    | Symbols: AML3, ML3   MEI2-like 3   chr4:10038415-10042248 FORWARD LENGTH=2575                                                                                                                                                                         |
| AT4G18340 | CUUGGAGUGUUAUUGUAGGUC   | 103  | 3   | Cleavage    | Symbols:   Glycosyl hydrolase superfamily protein   chr4:10130050-10132061 REVERSE LENGTH=1431                                                                                                                                                        |
| AT4G18370 | UACCGGAGGACGUAACAACCC   | 302  | 4   | Cleavage    | Symbols: DEG5, DEG_P5, HHOA   DEGP protease 5   chr4:10149129-10151218 FORWARD LENGTH=1245                                                                                                                                                            |
| AT4G18470 | UUAGGCGUGAGUAUAGACGCC   | 196  | 4   | Cleavage    | Symbols: SN11   negative regulator of systemic acquired resistance (SN1)   chr4:10192909-10195662 FORWARD LENGTH=1525                                                                                                                                 |
| AT4G18490 | UCUAGUUCGCAUUUUUGGAC    | 421  | 3   | Cleavage    | Symbols:   unknown protein; FUNCTIONS IN: molecular_function unknown; INVOLVED IN: biological_process unknown; LOCATED IN: cellular_component unknown; EXPRESSED IN: shoot, shoot apex, embryo, flower, seed; EXPRESSED DURING:                       |
| AT4G18530 | UGACCCACUUGUGCAUGAUCU   | 174  | 4   | Cleavage    | Symbols:   Protein of unknown function (DUF707)   chr4:10217338-10220500 FORWARD LENGTH=1796                                                                                                                                                          |
| AT4G18600 | UCUUGCAUGAGGUAGACGCCU   | 355  | 3   | Cleavage    | Symbols: WAVES, ATSCAR-LIKE, SCAR   SCAR family protein   chr4:10239881-10247372 REVERSE LENGTH=6153                                                                                                                                                  |
| AT4G18640 | UGAAGACAAUCUCACGUCGU    | 1483 | 3.5 | Translation | Symbols: MRH1   Leucine-rich repeat protein kinase family protein   chr4:10259678-10263764 FORWARD LENGTH=2861                                                                                                                                        |
| AT4G18730 | UCUGUAUGUAAUACUUGGGAC   | 1212 | 4.5 | Translation | Symbols: RPL16B   ribosomal protein L16B   chr4:10302163-10303382 FORWARD LENGTH=800                                                                                                                                                                  |
| AT4G18750 | UUACAUCUACCUCUUGGACU    | 380  | 4.5 | Cleavage    | Symbols: DOTA   Pentatricopeptide repeat (PPR) superfamily protein   chr4:10304850-10307570 FORWARD LENGTH=2721                                                                                                                                       |
| AT4G18910 | UUCGACACUAUAUAAUAGGCU   | 448  | 5   | Translation | Symbols: NIP12, NLM2, AT-NULM2, AT-NULM2   NIP12-like intrinsic protein 1,2   chr4:10366059-10368381 FORWARD LENGTH=1239                                                                                                                              |
| AT4G18980 | UAUUCUGAGAGCGGUGUUGGCG  | 334  | 4   | Cleavage    | Symbols: AISA40-3   AISA40-3   chr4:10398918-10399512 FORWARD LENGTH=595                                                                                                                                                                              |
| AT4G19030 | UUGAGAGCUCUACCCAGCAGU   | 261  | 3.5 | Cleavage    | Symbols: NLM1, NIP1.1, AT-NULM1, AT-NULM1   NOD26-like major intrinsic protein 1   chr4:10421525-10423487 REVERSE LENGTH=1172                                                                                                                         |
| AT4G19040 | UGAGAUUGCUAAGAGGAAGAAG  | 101  | 3.5 | Cleavage    | Symbols: EDR2   ENHANCED DISEASE RESISTANCE 2   chr4:10431520-10437431 REVERSE LENGTH=2696                                                                                                                                                            |
| AT4G19090 | UAGGCGUGAGAUUGGACGCCU   | 875  | 4   | Translation | Symbols:   Protein of unknown function (DUF594)   chr4:10449900-10452757 FORWARD LENGTH=2256                                                                                                                                                          |
| AT4G19150 | UUACGGGUGGAGAACAUUGACU  | 1291 | 3   | Cleavage    | Symbols:   Ankyrin repeat family protein   chr4:10471331-10472742 REVERSE LENGTH=1044                                                                                                                                                                 |
| AT4G19160 | GCAAGUGAUAUAAUAAAGACA   | 100  | 3.5 | Cleavage    | Symbols:   unknown protein; Has 30201 Blast hits to 17322 species: Archae - 12; Bacteria - 1396; Metazoa - 17338; Fungi - 3422; Plants - 5037; Viruses - 0; Other Eukaryotes - 2996 (source: NCBI BLink).   chr4:10477306-1048012                     |
| AT4G19170 | UAUCGAGCACCUACGACUAGCU  | 142  | 4.5 | Translation | Symbols: NCE4D, CCD4   nine-cis-epoxycarotenoid dioxygenase 4   chr4:10481786-10483857 FORWARD LENGTH=2072                                                                                                                                            |
| AT4G19210 | UAUUAUUUUUUGGCCUGAGGU   | 116  | 4   | Cleavage    | Symbols: ATRL12, RL12   RNase I inhibitor protein 2   chr4:10501200-10505217 FORWARD LENGTH=2279                                                                                                                                                      |
| AT4G19220 | CAACGCUUCUUGAUACUUAUG   | 133  | 3.5 | Translation | Symbols:   Tetrapicopeptide repeat (TPR)-like superfamily protein   chr4:10505266-10508121 REVERSE LENGTH=2799                                                                                                                                        |
| AT4G19490 | UUUGAGUGUUGUUGAGAGGUCU  | 141  | 3.5 | Cleavage    | Symbols: ATPV554, VP554   VP554   chr4:10615796-10623521 FORWARD LENGTH=3690                                                                                                                                                                          |
| AT4G19520 | UUGGCCUGAGGUUGGACACCU   | 178  | 4   | Translation | Symbols:   disease resistance protein (TIR-NBS-LRR class) family   chr4:10639269-10647079 REVERSE LENGTH=5463                                                                                                                                         |
| AT4G19530 | UUAGAAUUUAUUAUUGUUGGCG  | 138  | 4   | Cleavage    | Symbols:   disease resistance protein (TIR-NBS-LRR class) family   chr4:10651744-10657282 FORWARD LENGTH=3914                                                                                                                                         |
| AT4G19570 | UCACCAUUGGCGAGUCUGUACC  | 187  | 4.5 | Translation | Symbols:   Chaperone DnaJ-domain superfamily protein   chr4:10665294-10667318 FORWARD LENGTH=1892                                                                                                                                                     |
| AT4G19650 | UAAACAAGACUUCUUCUUUUUCU | 235  | 2.5 | Cleavage    | Symbols:   Mitochondrial transcription termination factor family protein   chr4:10691674-10695701 FORWARD LENGTH=2263                                                                                                                                 |
| AT4G19720 | CAUCAAGAACCGGUAUGACCU   | 125  | 5   | Cleavage    | Symbols:   Glycosyl hydrolase family protein with chitinase insertion domain   chr4:10730363-10731750 REVERSE LENGTH=1147                                                                                                                             |
| AT4G19740 | UCAGUAAGUUGCAUUAUUAUCU  | 104  | 4   | Cleavage    | Symbols:   Glycosyl hydrolase superfamily protein   chr4:10739567-10740620 REVERSE LENGTH=954                                                                                                                                                         |
| AT4G19750 | UCAGUAAGUUGCAUUAUUAUCU  | 104  | 4.5 | Cleavage    | Symbols:   Glycosyl hydrolase family protein with chitinase insertion domain   chr4:10745582-10747127 REVERSE LENGTH=1089                                                                                                                             |
| AT4G19880 | UUAAGAUUCGAGCACUUCUCCU  | 156  | 3.5 | Translation | Symbols:   Glutathione S-transferase family protein   chr4:10784391-10786439 REVERSE LENGTH=1438                                                                                                                                                      |
| AT4G19900 | UCAGGACUUGAGUAGACGACGAG | 515  | 3.5 | Cleavage    | Symbols:   alpha 1,4-glycosyltransferase family protein   chr4:10789096-10791433 REVERSE LENGTH=1983                                                                                                                                                  |
| AT4G19950 | ACCAAAUCUGUUGAACAGCCU   | 1107 | 4   | Cleavage    | Symbols:   unknown protein; BEST Arabidopsis thaliana protein match is: unknown protein (TAIR:AT5G44660.1); Has 338 Blast hits to 330 proteins in 72 species: Archae - 2; Bacteria - 94; Metazoa - 7; Fungi - 0; Plants - 232; Viruses - 0; Other Euk |
| AT4G20090 | UGACCCACACUGUACUAGUACU  | 174  | 4.5 | Cleavage    | Symbols: EMB1025   Pentatricopeptide repeat (PPR) superfamily protein   chr4:10868400-10870382 REVERSE LENGTH=1983                                                                                                                                    |
| AT4G20140 | UAUAGGCGUUGAAGAAAGUCCU  | 535  | 2.5 | Cleavage    | Symbols: GSO1   Leucine-rich repeat transmembrane protein kinase   chr4:10884197-10888270 FORWARD LENGTH=3998                                                                                                                                         |
| AT4G20210 | UUUCUGACGGACAGAAUAAAGU  | 480  | 3.5 | Cleavage    | Symbols:   Terpenoid cyclases/Protein prenyltransferases superfamily protein   chr4:10913613-10918282 REVERSE LENGTH=1803                                                                                                                             |
| AT4G20410 | UUUGAGCACUCUACACAGCAGG  | 162  | 4   | Cleavage    | Symbols: GSNAP, GAMMA-SNAP   gamma-soluble NSF attachment protein   chr4:11013895-11016576 REVERSE LENGTH=1202                                                                                                                                        |
| AT4G20430 | UUCAUCUGCAGUAGUUGUAGCU  | 314  | 4   | Cleavage    | Symbols:   Subtilase family protein   chr4:11017629-11021272 REVERSE LENGTH=2693                                                                                                                                                                      |
| AT4G20460 | UCUGAAUCUCAAAGCACCCCAA  | 493  | 3.5 | Cleavage    | Symbols:   NAD(P)-binding Rossmann-fold superfamily protein   chr4:11029736-11032677 REVERSE LENGTH=1685                                                                                                                                              |
| AT4G20720 | AUUCGAGAACUCCUGACCCCG   | 350  | 3.5 | Cleavage    | Symbols:   dentin sialophosphoprotein-related   chr4:11105318-11108053 FORWARD LENGTH=2493                                                                                                                                                            |
| AT4G20820 | UCUCAUGUAGUUCUAGUUGCGG  | 207  | 4   | Translation | Symbols:   FAD-binding Berberine family protein   chr4:11150160-11151758 FORWARD LENGTH=1599                                                                                                                                                          |
| AT4G20850 | UUGGUCACACAGUGGACUGUG   | 104  | 3.5 | Translation | Symbols: TPP2   tripeptidyl peptidase II   chr4:11160721-11169889 REVERSE LENGTH=4357                                                                                                                                                                 |
| AT4G20890 | UGAAUGACAAACUGGACAGUCCU | 583  | 4   | Cleavage    | Symbols: TUB9   tubulin beta-9 chain   chr4:11182092-11184072 FORWARD LENGTH=1693                                                                                                                                                                     |
| AT4G20940 | UUGAGCCUAGUGACGACGAUUCU | 176  | 3.5 | Translation | Symbols:   Leucine-rich receptor-like protein kinase family protein   chr4:11202728-11206280 FORWARD LENGTH=3176                                                                                                                                      |
| AT4G21090 | UUGACGAGGACGUAUUAUAGCU  | 176  | 4.5 | Translation | Symbols: ATMFDFX, MFDFX   MITOCHONDRIAL FERREDOWN 2   chr4:11256459-11258587 REVERSE LENGTH=960                                                                                                                                                       |
| AT4G21100 | UUUUAUGGAGACGUAUUCUCCU  | 200  | 3.5 | Translation | Symbols: DDB18   damaged DNA binding protein 1B   chr4:11258761-11265463 REVERSE LENGTH=3576                                                                                                                                                          |
| AT4G21120 | CCUGAGCCUAGUGACGACGAGUA | 270  | 4   | Cleavage    | Symbols: AAT1, CAT1   amino acid transporter 1   chr4:11270045-11273973 FORWARD LENGTH=2256                                                                                                                                                           |
| AT4G21160 | UUGAGAGAUCCUUGUUAUACU   | 141  | 4.5 | Cleavage    | Symbols: ZAC, AGD12   Calcium-dependent ARF-type GTPase activating protein family   chr4:11284147-11286767 FORWARD LENGTH=1377                                                                                                                        |
| AT4G21220 | UUUCUGAGGACAAAGUAUAGCU  | 313  | 4.5 | Translation | Symbols:   Trimeric LpxA-like enzymes superfamily protein   chr4:11316828-11319067 REVERSE LENGTH=1065                                                                                                                                                |
| AT4G21350 | CUUCGACUCGAGGUUAAGCGCCU | 234  | 4   | Cleavage    | Symbols: B80, PUB8   plant U-box 8   chr4:11356143-11357267 REVERSE LENGTH=1125                                                                                                                                                                       |
| AT4G21370 | AUUGUGUAUUAUUAUAGGCU    | 108  | 4.5 | Cleavage    | Symbols: PSEUDOSRKA   S-locus protein kinase, putative   chr4:11383884-11387136 REVERSE LENGTH=2559                                                                                                                                                   |
| AT4G21390 | UUUUAUUAUACCGGAUAAACUC  | 104  | 4   | Translation | Symbols: B120   S-locus lectin protein kinase family protein   chr4:11394355-11397583 REVERSE LENGTH=2762                                                                                                                                             |
| AT4G21490 | UUGGAGGAGUAUUAUAGCGGCC  | 4887 | 4.5 | Cleavage    | Symbols: NDB3   NAD(P)H dehydrogenase B3   chr4:11436495-11439326 REVERSE LENGTH=1743                                                                                                                                                                 |
| AT4G21500 | UCUAGUCCGAAAUAUAGCGGAC  | 163  | 4.5 | Cleavage    | Symbols:   unknown protein; FUNCTIONS IN: molecular_function unknown; INVOLVED IN: biological_process unknown; LOCATED IN: endomembrane system; BEST Arabidopsis thaliana protein match is: unknown protein (TAIR:AT4G05018.1); H                     |
| AT4G21510 | UUUAUACGAAUCUUGUGGCCU   | 310  | 3.5 | Cleavage    | Symbols:   F-box family protein   chr4:11445849-11447163 REVERSE LENGTH=1160                                                                                                                                                                          |
| AT4G21530 | UCUAUAGCCAAUUAUACUUCUCC | 106  | 4   | Cleavage    | Symbols:   Transducin/WD40 repeat-like superfamily protein   chr4:11450556-11456007 FORWARD LENGTH=2666                                                                                                                                               |
| AT4G21534 | UGAAUCUUGGUCAUACUGGACC  | 197  | 4.5 | Cleavage    | Symbols:   Diacylglycerol kinase family protein   chr4:11456230-11458820 FORWARD LENGTH=1446                                                                                                                                                          |
| AT4G21640 | UUGGGAGACUUAUAGCACGAGC  | 515  | 3.5 | Cleavage    | Symbols:   Subtilase family protein   chr4:11496834-11500618 REVERSE LENGTH=2202                                                                                                                                                                      |
| AT4G21895 | UCAUUCUUCUGUAGCUUCUCCG  | 210  | 2.5 | Cleavage    | Symbols:   DNA binding   chr4:11613311-11614941 REVERSE LENGTH=987                                                                                                                                                                                    |
| AT4G22010 | UUUGUAUCAAUGUAGUAGACU   | 4031 | 3   | Translation | Symbols: sks4   SKS5 similar 4   chr4:11663324-11666715 FORWARD LENGTH=1983                                                                                                                                                                           |
| AT4G22185 | UUUGAGUAUCCUUGUUAUUGCU  | 116  | 4.5 | Translation | Symbols:   pseudogene, similar to P0537A05.16, similar to protein; blastp match of 28% identity and 3.1e-07 P-value to GP 13366010 db BAB39287.1  [APO02971 P0537A05.16 [Oryza sativa (japonica cultivar-group)]]   chr4:11740053-117412              |
| AT4G22350 | UGAGGUGAGUAGAGACAUAUUA  | 107  | 4.5 | Cleavage    | Symbols:   Ubiquitin C-terminal hydrolases superfamily protein   chr4:11803834-11807178 REVERSE LENGTH=2011                                                                                                                                           |
| AT4G22390 | UUACGGGUGGAGAACAUUGACU  | 1291 | 3.5 | Cleavage    | Symbols:   F-box associated ubiquitinization effector family protein   chr4:11813425-11815133 REVERSE LENGTH=1408                                                                                                                                     |
| AT4G22410 | UGAGUGGUGAGUAGACCAUUAU  | 117  | 5   | Cleavage    | Symbols:   Ubiquitin C-terminal hydrolases superfamily protein   chr4:11818213-11820135 REVERSE LENGTH=1023                                                                                                                                           |
| AT4G22540 | UUUGGCCUGAGGUUGGACGCCU  | 367  | 5   | Cleavage    | Symbols: ORP2A   OSBP[oxysterol binding protein]-related protein 2A   chr4:11860444-11866364 REVERSE LENGTH=2782                                                                                                                                      |
| AT4G22560 | UACCGGAGGACGUAUUAUAGCU  | 401  | 5   | Cleavage    | Symbols:   unknown protein; BEST Arabidopsis thaliana protein match is: unknown protein (TAIR:AT4G12450.1); Has 380 Blast hits to 380 proteins in 21 species: Archae - 0; Bacteria - 0; Metazoa - 0; Fungi - 6; Plants - 374; Viruses - 0; Other Euk  |
| AT4G22630 | UUGAGAGCCUUGUAGUAUGUCCU | 262  | 3.5 | Translation | Symbols:   Bifunctional inhibitor/lipid-transfer protein/seed storage 2S albumin superfamily protein   chr4:11909368-11909945 FORWARD LENGTH=489                                                                                                      |
| AT4G22650 | UUGAGAGCCUUGUAGUAUGUCCU | 262  | 3.5 | Cleavage    | Symbols:   CONTAINS InterPro DOMAIN5: Plant lipid transfer protein/seed storage/trypsin-alpha amylase inhibitor [InterPro:IPR003612]; BEST Arabidopsis thaliana protein match is: Bifunctional inhibitor/lipid-transfer protein/seed storage 2S       |
| AT4G22690 | AAACAGGACAAUGUACUCCGCC  | 986  | 4.5 | Cleavage    | Symbols: CYP706A1   cytochrome P450, family 706, subfamily A, polypeptide 1   chr4:11929359-11931693 FORWARD LENGTH=2335                                                                                                                              |
| AT4G22710 | AAACAGGACAAUGUACUCCGCC  | 986  | 4.5 | Cleavage    | Symbols: CYP706A2   cytochrome P450, family 706, subfamily A, polypeptide 2   chr4:11934969-11936755 FORWARD LENGTH=1787                                                                                                                              |
| AT4G22960 | UUACGGGUGGAGAACAUUGACU  | 1291 | 4   | Cleavage    | Symbols:   Protein of unknown function (DUF544)   chr4:12030020-12033137 FORWARD LENGTH=1708                                                                                                                                                          |
| AT4G22990 | UGAGACACAAUAGCGGAGUACU  | 244  | 3   | Cleavage    | Symbols:   Major Facilitator Superfamily with SPX (SYG1/Pho81/XPR1) domain-containing protein   chr4:12048186-12051796 REVERSE LENGTH=2431                                                                                                            |
| AT4G23010 | UUAACAAUUCGAGCAUCCUCCU  | 156  | 4   | Cleavage    | Symbols: ATUTR2, UTR2   UDP-galactose transporter 2   chr4:12060131-12062757 REVERSE LENGTH=1547                                                                                                                                                      |
| AT4G23130 | UUAGCACCCGAGGAGUAGGACU  | 330  | 4   | Cleavage    | Symbols: CRK5, RLK5   cysteine-rich RLK (RECEPTOR-like protein kinase) 5   chr4:12117598-12120134 REVERSE LENGTH=2082                                                                                                                                 |
| AT4G23170 | UUGAACACGCCUGAUGAAGUUG  | 102  | 3.5 | Cleavage    | Symbols: EPL1, CRK9   receptor-like protein kinase-related family protein   chr4:12135093-12136157 FORWARD LENGTH=1065                                                                                                                                |
| AT4G23200 | UAGCCGACCAAGUAGUAGUUAUC | 111  | 4   | Cleavage    | Symbols: CRK12   cysteine-rich RLK (RECEPTOR-like protein kinase) 12   chr4:12145380-12147934 REVERSE LENGTH=1947                                                                                                                                     |
| AT4G23205 | UUUGUAUUAUUAUUAUAGGCU   | 108  | 3.5 | Cleavage    | Symbols:   other RNA   chr4:12144243-12144958 REVERSE LENGTH=490                                                                                                                                                                                      |
| AT4G23290 | UAUGGAGUAGUACGCAUUGGCG  | 937  | 4.5 | Cleavage    | Symbols: CRK21   cysteine-rich RLK (RECEPTOR-like protein kinase) 21   chr4:12177738-12180784 REVERSE LENGTH=2090                                                                                                                                     |
| AT4G23320 | UUUCUUGUAUUAUAGCCGGGA   | 158  | 4   | Cleavage    | Symbols: CRK24   cysteine-rich RLK (RECEPTOR-like protein kinase) 24   chr4:12189182-12191977 REVERSE LENGTH=1314                                                                                                                                     |

|           |                         |      |     |             |                                                                                                                                                                                                                                                      |
|-----------|-------------------------|------|-----|-------------|------------------------------------------------------------------------------------------------------------------------------------------------------------------------------------------------------------------------------------------------------|
| AT4G23370 | UUUGAGUGUUUGUAGGUCU     | 141  | 3.5 | Cleavage    | [ Symbols:   unknown protein; FUNCTIONS IN: molecular_function unknown; INVOLVED IN: biological_process unknown; LOCATED IN: endomembrane system; CONTAINS InterPro DOMAIN/s: Protein of unknown function DUF239, plant InterPr                      |
| AT4G23380 | CUUGUGAGUUUUUGUAGGUC    | 103  | 4   | Cleavage    | [ Symbols:   Protein of Unknown Function (DUF239)   chr4:12214667-12216333 REVERSE LENGTH=1203                                                                                                                                                       |
| AT4G23515 | UAUGGAGUAUGACGAUUGGC    | 937  | 5   | Translation | [ Symbols:   Toll-Interleukin-Resistance (TIR) domain family protein   chr4:12271382-12272842 REVERSE LENGTH=996                                                                                                                                     |
| AT4G23530 | UGACGGGAAGCUACAGAGAUUG  | 108  | 5   | Cleavage    | [ Symbols:   Protein of unknown function (DUF793)   chr4:12279075-12280851 FORWARD LENGTH=1777                                                                                                                                                       |
| AT4G23540 | CAAGAACCCGACGACACUCG    | 169  | 4   | Translation | [ Symbols:   ARM repeat superfamily protein   chr4:12280413-12286420 REVERSE LENGTH=3530                                                                                                                                                             |
| AT4G23600 | UUUAICACGAACUUCUGGCCG   | 310  | 4   | Cleavage    | [ Symbols:   COR3, IRJ2   Tyrosine transaminase family protein   chr4:12311255-12313111 FORWARD LENGTH=1307                                                                                                                                          |
| AT4G23750 | UCCCGGAUUGUGUAGGAAGUA   | 113  | 3.5 | Translation | [ Symbols:   CRF2, TM03   cytokinin response factor 2   chr4:12376194-12378022 FORWARD LENGTH=1618                                                                                                                                                   |
| AT4G23990 | UCGAGGCGAGGACCAUUGACU   | 334  | 2   | Cleavage    | [ Symbols:   ATCSLG3, CSLG3   cellulose synthase like G3   chr4:12456489-12460753 FORWARD LENGTH=2513                                                                                                                                                |
| AT4G24010 | UUGGACGCGAGCAUUGAGCA    | 334  | 2   | Cleavage    | [ Symbols:   ATCSLG1, CSLG1   cellulose synthase like G1   chr4:12466345-12469844 FORWARD LENGTH=2413                                                                                                                                                |
| AT4G24100 | UUUGUUAACUAUGGUCUACCC   | 165  | 4   | Cleavage    | [ Symbols:   Protein kinase superfamily protein   chr4:12515076-12519841 FORWARD LENGTH=2782                                                                                                                                                         |
| AT4G24240 | UCACUGUAGAUUCUGGAGU     | 123  | 4   | Cleavage    | [ Symbols:   WRKY7, ATWRKY7   WRKY DNA-binding protein 7   chr4:12571766-12573725 FORWARD LENGTH=1505                                                                                                                                                |
| AT4G24260 | UUGAUCAAGUUGUGACUCUCU   | 4031 | 3.5 | Translation | [ Symbols:   ATGH9A3, KOR3, GH9A3   glycosyl hydrolase 9A3   chr4:12577871-12580133 REVERSE LENGTH=1863                                                                                                                                              |
| AT4G24280 | UUUGUUAACUACUUGGUCACCC  | 165  | 4   | Translation | [ Symbols:   cpHsc70-1   chloroplast heat shock protein 70-1   chr4:12589988-12593630 FORWARD LENGTH=2456                                                                                                                                            |
| AT4G24330 | UUGGCAUCGAAUUGAAUCU     | 339  | 3.5 | Cleavage    | [ Symbols:   Protein of unknown function (DUF1682)   chr4:12603521-12606328 REVERSE LENGTH=1863                                                                                                                                                      |
| AT4G24370 | UGGAUUCGGGCGCAUACUCC    | 392  | 4   | Cleavage    | [ Symbols:   unknown protein; Has 30201 Blast hits to 17322 proteins in 780 species: Archae - 12; Bacteria - 1396; Metazoa - 17338; Fungi - 3422; Plants - 5037; Viruses - 0; Other Eukaryotes - 2996 (source: NCBI BLink).   chr4:12611396-12612123 |
| AT4G24400 | UUGGACGCCUCUAUGAAGAGA   | 679  | 4.5 | Translation | [ Symbols:   CIPK8, PKS11   CBL-interacting protein kinase 8   chr4:12617256-12620684 FORWARD LENGTH=1615                                                                                                                                            |
| AT4G24430 | UGAGUAGAAUUGCAUCAUAC    | 114  | 3.5 | Cleavage    | [ Symbols:   Rhamnogalacturonate lyase family protein   chr4:12630018-12633075 FORWARD LENGTH=2041                                                                                                                                                   |
| AT4G24450 | UUUAGGAUUGUUGCAUAUGCA   | 1164 | 4   | Cleavage    | [ Symbols:   GWD3, PWD, ATGWD2   phosphoglucan, water kinase   chr4:12635426-12642797 FORWARD LENGTH=4150                                                                                                                                            |
| AT4G24560 | CGAGAGAUUGAGGACGACUCU   | 3198 | 4   | Cleavage    | [ Symbols:   UBP16   ubiquitin-specific protease 16   chr4:12679210-12684939 REVERSE LENGTH=3721                                                                                                                                                     |
| AT4G24580 | UUUGGCUCGAGGUUGAGCCGC   | 367  | 4   | Cleavage    | [ Symbols:   RENT1   Rho GTPase activation protein (RhoGAP) with PH domain   chr4:12687879-12694248 REVERSE LENGTH=2802                                                                                                                              |
| AT4G24680 | CGGAUUCUGAUUGCAUGUGGU   | 186  | 4.5 | Translation | [ Symbols:   MOS1   modifier of snct   chr4:12732678-12740051 FORWARD LENGTH=4763                                                                                                                                                                    |
| AT4G24800 | UUAGGUGGAGAACACUUGACU   | 1291 | 4.5 | Cleavage    | [ Symbols:   MA3 domain-containing protein   chr4:12781916-12785197 FORWARD LENGTH=2658                                                                                                                                                              |
| AT4G24860 | CUAGAAUUCUUCUCCUUAUCU   | 235  | 3   | Translation | [ Symbols:   P-loop containing nucleoside triphosphate hydrolases superfamily protein   chr4:12801549-12808190 REVERSE LENGTH=3400                                                                                                                   |
| AT4G24920 | UUGACGCCGAGGAUUGAGUACU  | 330  | 4   | Translation | [ Symbols:   secE/secE3 gamma protein transport protein   chr4:12819511-12820736 REVERSE LENGTH=510                                                                                                                                                  |
| AT4G25420 | CAACGCUUCUGUAUACUACUAG  | 133  | 3.5 | Cleavage    | [ Symbols:   GAS, GA20OX1, ATZ301, ATGA20OX1   2-oxoglutarate (2OG) and Fe(II)-dependent oxygenase superfamily protein   chr4:12990884-12992458 REVERSE LENGTH=1281                                                                                  |
| AT4G25470 | AUUGAUUCUGCACUCAAGGGC   | 128  | 4.5 | Cleavage    | [ Symbols:   CBF2, DBRE1C, FTQ4, ATCBF2   C-repeat/DRE binding factor 2   chr4:13015277-13016220 REVERSE LENGTH=944                                                                                                                                  |
| AT4G25620 | UAUAGGGCUUGAAGAAAGUUC   | 535  | 4.5 | Translation | [ Symbols:   hydroxyproline-rich glycoprotein family protein   chr4:13067186-13066979 REVERSE LENGTH=1994                                                                                                                                            |
| AT4G25860 | AUUGUGUAUAAUUAUUGAGCCU  | 108  | 3.5 | Cleavage    | [ Symbols:   ORPA4   OSBP(oxysterol binding protein)-related protein 4A   chr4:13147326-13149606 FORWARD LENGTH=1271                                                                                                                                 |
| AT4G25960 | UGUGAGUGUUUUGUAGGUCU    | 178  | 4   | Cleavage    | [ Symbols:   PGP2   P-glycoprotein 2   chr4:13177409-13183631 FORWARD LENGTH=4057                                                                                                                                                                    |
| AT4G26250 | UGUGAGUGUUUUGUAGGUCU    | 178  | 3.5 | Cleavage    | [ Symbols:   ATGo156, Go156   galactinol synthase 6   chr4:13289641-13291084 FORWARD LENGTH=1042                                                                                                                                                     |
| AT4G26410 | UGACACGAAUUCUGAUAGUCU   | 823  | 3.5 | Cleavage    | [ Symbols:   Uncharacterised conserved protein UCPO2280   chr4:13346654-13349016 FORWARD LENGTH=1123                                                                                                                                                 |
| AT4G26580 | UCACUUCUGCGAAUUGUACCC   | 138  | 4   | Cleavage    | [ Symbols:   RING/U-box superfamily protein   chr4:13411444-13413029 REVERSE LENGTH=1409                                                                                                                                                             |
| AT4G26650 | AAACAGGACAAUGUACUCCGC   | 986  | 3.5 | Cleavage    | [ Symbols:   RNA-binding (RRM/RBP motifs) family protein   chr4:13444938-13448212 FORWARD LENGTH=2306                                                                                                                                                |
| AT4G26690 | UGAGAGCACUCACCCGACUGA   | 230  | 4.5 | Translation | [ Symbols:   SHV3, MRH5, GPD12   PLC-like phosphodiesterase family protein   chr4:13456434-13460060 REVERSE LENGTH=2809                                                                                                                              |
| AT4G26720 | UGACCCACACUGUACGACU     | 174  | 3.5 | Cleavage    | [ Symbols:   PPX1, PPX-1   protein phosphatase X 1   chr4:13470032-13472342 REVERSE LENGTH=1471                                                                                                                                                      |
| AT4G26890 | UGACGGACAAGAAUUGUUGU    | 1505 | 4   | Cleavage    | [ Symbols:   MAPKKK16   mitogen-activated protein kinase kinase kinase 16   chr4:13511839-13513406 FORWARD LENGTH=1568                                                                                                                               |
| AT4G27050 | UUGGGAGACUAUUGACACGAG   | 515  | 3.5 | Cleavage    | [ Symbols:   F-box/RN1-like superfamily protein   chr4:13575800-13577993 REVERSE LENGTH=1923                                                                                                                                                         |
| AT4G27060 | UGACACCGAAUUCUGAUAGUCU  | 823  | 4   | Cleavage    | [ Symbols:   TOR1, SPR2, CN   ARM repeat superfamily protein   chr4:13581401-13585155 REVERSE LENGTH=2860                                                                                                                                            |
| AT4G27100 | AAUUAUAAACUAAACCAUGCCU  | 203  | 4.5 | Cleavage    | [ Symbols:   Ypt/Rab-GAP domain of gyp1p superfamily protein   chr4:13595561-13598915 FORWARD LENGTH=1881                                                                                                                                            |
| AT4G27180 | UCUAGUUCGGGUUCUUCACAG   | 300  | 3.5 | Translation | [ Symbols:   ATK2, KAT6   kinesin 2   chr4:13614856-13619156 REVERSE LENGTH=2612                                                                                                                                                                     |
| AT4G27250 | UAUUGAUUUUUGGCGCAGGU    | 116  | 3.5 | Cleavage    | [ Symbols:   NAD(P)-binding Rossmann-fold superfamily protein   chr4:13642772-13644425 REVERSE LENGTH=1096                                                                                                                                           |
| AT4G27370 | UUAGAAUUAUACUUGUUCUGGC  | 138  | 3.5 | Cleavage    | [ Symbols:   WII8, ATVIIIB   P-loop containing nucleoside triphosphate hydrolases superfamily protein   chr4:13694881-13700780 REVERSE LENGTH=3405                                                                                                   |
| AT4G27440 | UUUGAUUCACCGCAUAAACUC   | 175  | 3.5 | Translation | [ Symbols:   POR8   protochlorophyllide oxidoreductase B   chr4:13725546-13727352 FORWARD LENGTH=1446                                                                                                                                                |
| AT4G27640 | UUUGGUUCUGAGUUCGCCGC    | 669  | 3   | Cleavage    | [ Symbols:   ARM repeat superfamily protein   chr4:13797658-13803063 REVERSE LENGTH=3589                                                                                                                                                             |
| AT4G27680 | UGUGAGUGUUUUGUAGGUCU    | 178  | 3   | Cleavage    | [ Symbols:   P-loop containing nucleoside triphosphate hydrolases superfamily protein   chr4:13821106-13823342 FORWARD LENGTH=1613                                                                                                                   |
| AT4G27780 | UGGCAUCGAAUUAUGACUACU   | 178  | 3   | Translation | [ Symbols:   ACBP2   acyl-CoA binding protein 2   chr4:13847549-13849887 FORWARD LENGTH=1548                                                                                                                                                         |
| AT4G27950 | UCAUUAUGGCAUUGGCUACACC  | 101  | 4   | Translation | [ Symbols:   CRF4   cytokinin response factor 4   chr4:13909569-13910859 REVERSE LENGTH=1291                                                                                                                                                         |
| AT4G28030 | UGACACGAAUUCUGAUAGUCU   | 823  | 4   | Cleavage    | [ Symbols:   Acyl-CoA N-acyltransferases (NAT) superfamily protein   chr4:13937676-13939144 REVERSE LENGTH=877                                                                                                                                       |
| AT4G28070 | UUUGAUCCGAGGAGUUGGGAU   | 816  | 4   | Cleavage    | [ Symbols:   AFG1-like ATPase family protein   chr4:13945892-13948627 FORWARD LENGTH=1677                                                                                                                                                            |
| AT4G28370 | UUUGAGCACUCUAACAGACGAG  | 162  | 3.5 | Cleavage    | [ Symbols:   RING/U-box superfamily protein   chr4:14034654-14041322 FORWARD LENGTH=3919                                                                                                                                                             |
| AT4G28530 | CAUUGACUUCUACAGCUGCGCU  | 190  | 2.5 | Cleavage    | [ Symbols:   anac074, NAC074   NAC domain containing protein 74   chr4:14090489-14094776 REVERSE LENGTH=1357                                                                                                                                         |
| AT4G28550 | UGAGACAACACGAGGAUUAUC   | 244  | 4   | Cleavage    | [ Symbols:   Ypt/Rab-GAP domain of gyp1p superfamily protein   chr4:14110884-14113748 FORWARD LENGTH=1685                                                                                                                                            |
| AT4G28570 | UGUGACACCGAAUUCUGAUUGC  | 114  | 3   | Cleavage    | [ Symbols:   Long-chain fatty alcohol dehydrogenase family protein   chr4:14119425-14122616 FORWARD LENGTH=2747                                                                                                                                      |
| AT4G28680 | UGGUGGACUUAUUGGACGAUUG  | 244  | 3   | Translation | [ Symbols:   TYRDC, TYRDC1   L-tyrosine decarboxylase   chr4:14155248-14158716 FORWARD LENGTH=1808                                                                                                                                                   |
| AT4G28720 | CAGAAACCCGACGACGACU     | 169  | 3.5 | Cleavage    | [ Symbols:   YUC8   Flavin-binding monooxygenase family protein   chr4:14192583-14194256 FORWARD LENGTH=1674                                                                                                                                         |
| AT4G28860 | UUUCUUGUGAACUUGACGGGGA  | 158  | 3.5 | Translation | [ Symbols:   cdk4   casein kinase I-like 4   chr4:14246283-14249014 FORWARD LENGTH=1404                                                                                                                                                              |
| AT4G28920 | UUUCUGAGGACGAGGUUAUCU   | 302  | 4   | Cleavage    | [ Symbols:   Protein of unknown function (DUF626)   chr4:14268415-14269885 REVERSE LENGTH=879                                                                                                                                                        |
| AT4G28940 | UUUCUGACGGACAAGAAAGU    | 480  | 3.5 | Cleavage    | [ Symbols:   Phosphorylase superfamily protein   chr4:14274341-14277095 FORWARD LENGTH=1295                                                                                                                                                          |
| AT4G28990 | UCACCAUUGGGAGCUCUGUACC  | 187  | 4   | Translation | [ Symbols:   RNA-binding protein-related   chr4:14291151-14293174 FORWARD LENGTH=1398                                                                                                                                                                |
| AT4G29033 | UCUAGUUCGCAUUAUUCGGAC   | 142  | 4   | Cleavage    | [ Symbols:   Defensin-like (DFL) family protein   chr4:14308967-14309379 REVERSE LENGTH=246                                                                                                                                                          |
| AT4G29070 | CUGGAGGACGUAUGGCAACUUA  | 113  | 4.5 | Cleavage    | [ Symbols:   Phospholipase A2 family protein   chr4:14321813-14323307 FORWARD LENGTH=1121                                                                                                                                                            |
| AT4G29130 | UGAGAUUGCUAGAGGAAGAG    | 101  | 2.5 | Cleavage    | [ Symbols:   ATHXK1, GIN2, HXK1   hexokinase 1   chr4:14352037-14355103 REVERSE LENGTH=2030                                                                                                                                                          |
| AT4G29220 | UCAUCUUCUGUAGCUUCCUCG   | 210  | 4   | Cleavage    | [ Symbols:   PFK1   phosphofructokinase 1   chr4:14403347-14406592 REVERSE LENGTH=2068                                                                                                                                                               |
| AT4G29260 | UUUGAGGCGUUUGUAGUAGUCU  | 262  | 3   | Cleavage    | [ Symbols:   HAD superfamily, subfamily IIIB acid phosphatase   chr4:14422152-14423603 REVERSE LENGTH=1120                                                                                                                                           |
| AT4G29380 | UGUGGAUACAAGAGCUGGGCU   | 215  | 2.5 | Cleavage    | [ Symbols:   protein kinase family protein / WD-40 repeat family protein   chr4:14458822-14464859 FORWARD LENGTH=4652                                                                                                                                |
| AT4G29440 | UUUGAGAGCACUCACCCGACUG  | 125  | 4.5 | Translation | [ Symbols:   Regulator of Vps4 activity in the MVB pathway protein   chr4:14473757-14477877 REVERSE LENGTH=3614                                                                                                                                      |
| AT4G29680 | UUUGAUCAAGUUGACUGACU    | 4031 | 2.5 | Translation | [ Symbols:   Alkaline-phosphatase-like family protein   chr4:14537781-14539594 REVERSE LENGTH=1814                                                                                                                                                   |
| AT4G29830 | UUUGAUUCAGACCGCGGGGCU   | 131  | 3   | Cleavage    | [ Symbols:   Ypt/Rab-GAP domain of gyp1p superfamily protein   chr4:14597661-14599300 FORWARD LENGTH=1176                                                                                                                                            |
| AT4G29890 | UAGAGUUGUUGUAUGUAGUUGCA | 232  | 4   | Cleavage    | [ Symbols:   choline monooxygenase, putative (CMO-like)   chr4:14608833-14610998 FORWARD LENGTH=1397                                                                                                                                                 |
| AT4G29900 | UCAUUAUGUUGUUGCUACACC   | 101  | 3.5 | Cleavage    | [ Symbols:   ACA10, CIF1, ATACA10   autoinhibited Ca(2+)-ATPase 10   chr4:14610883-14619173 REVERSE LENGTH=3762                                                                                                                                      |
| AT4G29940 | AUUIUCUGGAGGACGAGUACUC  | 200  | 4   | Cleavage    | [ Symbols:   PRHA   pathogenesis related homeodomain protein A   chr4:14648164-14653303 REVERSE LENGTH=2629                                                                                                                                          |
| AT4G29990 | UUUGACUUGAGGUAAGCGCCU   | 355  | 3.5 | Cleavage    | [ Symbols:   Leucine-rich repeat transmembrane protein kinase protein   chr4:14665691-14670030 REVERSE LENGTH=3334                                                                                                                                   |
| AT4G30090 | UUAAUCCAAGUAGCUGACUCU   | 2805 | 3.5 | Cleavage    | [ Symbols:   emb1353   embryo defective 1353   chr4:14708712-14711612 REVERSE LENGTH=1498                                                                                                                                                            |
| AT4G30190 | UUAGAAUUAUACUUGUUGGCG   | 138  | 3.5 | Translation | [ Symbols:   HA2   H(+)-ATPase 2   chr4:14770794-14776058 REVERSE LENGTH=3110                                                                                                                                                                        |
| AT4G30230 | UUUGAUUCACCGGAAUAAACUC  | 175  | 3.5 | Cleavage    | [ Symbols:   unknown protein; Has 42 Blast hits to 42 proteins in 5 species: Archae - 0; Bacteria - 0; Metazoa - 0; Fungi - 42; Viruses - 0; Other Eukaryotes - 0 (source: NCBI BLink).   chr4:14806345-14807425 FORWARD LENGTH=1081                 |
| AT4G30290 | UCAUUAUGGCAUUAUGGCUACCC | 101  | 4.5 | Cleavage    | [ Symbols:   ATXTH19, XTH19   xyloglucan endotransglucosylase/hydrolase 19   chr4:14828712-14830016 REVERSE LENGTH=1127                                                                                                                              |
| AT4G30310 | UUUCUUGAGCAGGAGGUUAUCU  | 302  | 4   | Cleavage    | [ Symbols:   FGGY family of carbohydrate kinase   chr4:14832316-14835092 FORWARD LENGTH=1584                                                                                                                                                         |
| AT4G30340 | UAUUAAGGAGAGUUGGUAUCCU  | 298  | 4   | Translation | [ Symbols:   ATDGK7, DGK7   diacylglycerol kinase 7   chr4:14838291-14841067 REVERSE LENGTH=1779                                                                                                                                                     |
| AT4G30360 | UCGACAAGAGCUGGAACGUCU   | 423  | 3   | Translation | [ Symbols:   ATCNGC17, CNGC17   cyclic nucleotide-gated channel 17   chr4:14854811-14858003 REVERSE LENGTH=2636                                                                                                                                      |
| AT4G30470 | UAUUAAGGAGAGUACGACUACU  | 298  | 3   | Cleavage    | [ Symbols:   NAD(P)-binding Rossmann-fold superfamily protein   chr4:14894105-14896815 FORWARD LENGTH=1379                                                                                                                                           |
| AT4G30560 | UUUCUGCGGACAAGAUAAUGAC  | 313  | 5   | Cleavage    | [ Symbols:   CNGC9   cyclic nucleotide gated channel 9   chr4:14926834-14930156 REVERSE LENGTH=2414                                                                                                                                                  |
| AT4G30720 | UUGGCGCUCUACUCUGCAAGG   | 4868 | 4   | Translation | [ Symbols:   FAD/NAD(P)-binding oxidoreductase family protein   chr4:14971906-14975519 REVERSE LENGTH=2488                                                                                                                                           |
| AT4G30800 | UCUAGUUCGCAUUAUUGGGAC   | 421  | 3.5 | Cleavage    | [ Symbols:   Nucleic acid-binding, OB-fold-like protein   chr4:15001134-15002671 FORWARD LENGTH=841                                                                                                                                                  |
| AT4G30850 | UGUCACCGUGAGUUAUUCUUCU  | 123  | 3   | Cleavage    | [ Symbols:   HHP2   heptahelical transmembrane protein2   chr4:15020415-15022445 REVERSE LENGTH=1369                                                                                                                                                 |
| AT4G30950 | UCAACGCUUGUAGUACUACUAG  | 118  | 3.5 | Translation | [ Symbols:   FAD6, FAD6, SF4D   fatty acid desaturase 6   chr4:15056975-15059794 REVERSE LENGTH=1771                                                                                                                                                 |
| AT4G30990 | CAGAAACCCGACGACGACU     | 169  | 3.5 | Cleavage    | [ Symbols:   ARM repeat superfamily protein   chr4:15084098-15097920 FORWARD LENGTH=8101                                                                                                                                                             |
| AT4G31210 | UUUGAUCCGGAAGUAGUAGU    | 816  | 4   | Cleavage    | [ Symbols:   DNA topoisomerase, type IA, core   chr4:15165156-15172738 FORWARD LENGTH=4183                                                                                                                                                           |
| AT4G31250 | UUUGAUCCAAGUAGCUGACUCU  | 4031 | 2.5 | Cleavage    | [ Symbols:   Leucine-rich repeat protein kinase family protein   chr4:15178925-15181751 REVERSE LENGTH=2307                                                                                                                                          |
| AT4G31340 | UUUCUGACGGACAAGAAAGU    | 480  | 4   | Cleavage    | [ Symbols:   myosin heavy chain-related   chr4:15205480-15209601 FORWARD LENGTH=1885                                                                                                                                                                 |

|           |                        |      |     |             |                                                                                                                                                                                                                                                                                                                                                                                                                                                                                                                                                                                                                                                                                                                                                                                                                                                                                                                                                                                                                                                                                                                                                                                                                                                                                                                                                                                                                                                                                                                                                                                                                                                                                                                                                                                                                                                                                                                                                                                                                                                                                                                                                                                                                                                                                                                                                                                                                                                                                                                                                                                                                                                                                                                                                                                                                                                                                                                                                                                                                                                                                                                                                                                                                                                                                                                                                                                                                                                                                                                                                                                                                                                                                                                                                                                                                                                                                                                                                                                                                                                                                                                                                                                                                                                                                                                                                                                                                                                                                                                                                                                                                                                                                                                                                                                                                                                                                                                                                                                                                                                                                                                                                                                                                                                                                                                                                                                                                                                                                                                                                                                                                                                                                                                                                                                                                                                                                                                                                                                                                                                                                                                                                                                                 |
|-----------|------------------------|------|-----|-------------|-------------------------------------------------------------------------------------------------------------------------------------------------------------------------------------------------------------------------------------------------------------------------------------------------------------------------------------------------------------------------------------------------------------------------------------------------------------------------------------------------------------------------------------------------------------------------------------------------------------------------------------------------------------------------------------------------------------------------------------------------------------------------------------------------------------------------------------------------------------------------------------------------------------------------------------------------------------------------------------------------------------------------------------------------------------------------------------------------------------------------------------------------------------------------------------------------------------------------------------------------------------------------------------------------------------------------------------------------------------------------------------------------------------------------------------------------------------------------------------------------------------------------------------------------------------------------------------------------------------------------------------------------------------------------------------------------------------------------------------------------------------------------------------------------------------------------------------------------------------------------------------------------------------------------------------------------------------------------------------------------------------------------------------------------------------------------------------------------------------------------------------------------------------------------------------------------------------------------------------------------------------------------------------------------------------------------------------------------------------------------------------------------------------------------------------------------------------------------------------------------------------------------------------------------------------------------------------------------------------------------------------------------------------------------------------------------------------------------------------------------------------------------------------------------------------------------------------------------------------------------------------------------------------------------------------------------------------------------------------------------------------------------------------------------------------------------------------------------------------------------------------------------------------------------------------------------------------------------------------------------------------------------------------------------------------------------------------------------------------------------------------------------------------------------------------------------------------------------------------------------------------------------------------------------------------------------------------------------------------------------------------------------------------------------------------------------------------------------------------------------------------------------------------------------------------------------------------------------------------------------------------------------------------------------------------------------------------------------------------------------------------------------------------------------------------------------------------------------------------------------------------------------------------------------------------------------------------------------------------------------------------------------------------------------------------------------------------------------------------------------------------------------------------------------------------------------------------------------------------------------------------------------------------------------------------------------------------------------------------------------------------------------------------------------------------------------------------------------------------------------------------------------------------------------------------------------------------------------------------------------------------------------------------------------------------------------------------------------------------------------------------------------------------------------------------------------------------------------------------------------------------------------------------------------------------------------------------------------------------------------------------------------------------------------------------------------------------------------------------------------------------------------------------------------------------------------------------------------------------------------------------------------------------------------------------------------------------------------------------------------------------------------------------------------------------------------------------------------------------------------------------------------------------------------------------------------------------------------------------------------------------------------------------------------------------------------------------------------------------------------------------------------------------------------------------------------------------------------------------------------------------------------------------------------------------------------|
| AT4G31360 | UCUGUACCGGUAUUCUUA     | 275  | 4.5 | Cleavage    | Symbols:   selenium binding   chr4:15221843-1523627 FORWARD LENGTH=980                                                                                                                                                                                                                                                                                                                                                                                                                                                                                                                                                                                                                                                                                                                                                                                                                                                                                                                                                                                                                                                                                                                                                                                                                                                                                                                                                                                                                                                                                                                                                                                                                                                                                                                                                                                                                                                                                                                                                                                                                                                                                                                                                                                                                                                                                                                                                                                                                                                                                                                                                                                                                                                                                                                                                                                                                                                                                                                                                                                                                                                                                                                                                                                                                                                                                                                                                                                                                                                                                                                                                                                                                                                                                                                                                                                                                                                                                                                                                                                                                                                                                                                                                                                                                                                                                                                                                                                                                                                                                                                                                                                                                                                                                                                                                                                                                                                                                                                                                                                                                                                                                                                                                                                                                                                                                                                                                                                                                                                                                                                                                                                                                                                                                                                                                                                                                                                                                                                                                                                                                                                                                                                          |
| AT4G31600 | UAAACUUAACCAUUCUUA     | 302  | 4   | Cleavage    | Symbols:   UDP-N-acetylglucosamine (UAA) transporter family   chr4:15314885-15317135 REVERSE LENGTH=1633                                                                                                                                                                                                                                                                                                                                                                                                                                                                                                                                                                                                                                                                                                                                                                                                                                                                                                                                                                                                                                                                                                                                                                                                                                                                                                                                                                                                                                                                                                                                                                                                                                                                                                                                                                                                                                                                                                                                                                                                                                                                                                                                                                                                                                                                                                                                                                                                                                                                                                                                                                                                                                                                                                                                                                                                                                                                                                                                                                                                                                                                                                                                                                                                                                                                                                                                                                                                                                                                                                                                                                                                                                                                                                                                                                                                                                                                                                                                                                                                                                                                                                                                                                                                                                                                                                                                                                                                                                                                                                                                                                                                                                                                                                                                                                                                                                                                                                                                                                                                                                                                                                                                                                                                                                                                                                                                                                                                                                                                                                                                                                                                                                                                                                                                                                                                                                                                                                                                                                                                                                                                                        |
| AT4G31615 | UGACGGAAAGCUACAGGAUG   | 108  | 3.5 | Cleavage    | Symbols:   Transcriptional factor B3 family protein   chr4:15320297-1532194 REVERSE LENGTH=1464                                                                                                                                                                                                                                                                                                                                                                                                                                                                                                                                                                                                                                                                                                                                                                                                                                                                                                                                                                                                                                                                                                                                                                                                                                                                                                                                                                                                                                                                                                                                                                                                                                                                                                                                                                                                                                                                                                                                                                                                                                                                                                                                                                                                                                                                                                                                                                                                                                                                                                                                                                                                                                                                                                                                                                                                                                                                                                                                                                                                                                                                                                                                                                                                                                                                                                                                                                                                                                                                                                                                                                                                                                                                                                                                                                                                                                                                                                                                                                                                                                                                                                                                                                                                                                                                                                                                                                                                                                                                                                                                                                                                                                                                                                                                                                                                                                                                                                                                                                                                                                                                                                                                                                                                                                                                                                                                                                                                                                                                                                                                                                                                                                                                                                                                                                                                                                                                                                                                                                                                                                                                                                 |
| AT4G31640 | UACACGCUCAUGUACAUCAUG  | 118  | 3.5 | Cleavage    | Symbols:   transcriptional factor B3 family protein   chr4:15328357-15329689 FORWARD LENGTH=1090                                                                                                                                                                                                                                                                                                                                                                                                                                                                                                                                                                                                                                                                                                                                                                                                                                                                                                                                                                                                                                                                                                                                                                                                                                                                                                                                                                                                                                                                                                                                                                                                                                                                                                                                                                                                                                                                                                                                                                                                                                                                                                                                                                                                                                                                                                                                                                                                                                                                                                                                                                                                                                                                                                                                                                                                                                                                                                                                                                                                                                                                                                                                                                                                                                                                                                                                                                                                                                                                                                                                                                                                                                                                                                                                                                                                                                                                                                                                                                                                                                                                                                                                                                                                                                                                                                                                                                                                                                                                                                                                                                                                                                                                                                                                                                                                                                                                                                                                                                                                                                                                                                                                                                                                                                                                                                                                                                                                                                                                                                                                                                                                                                                                                                                                                                                                                                                                                                                                                                                                                                                                                                |
| AT4G31720 | UACCGGAGGAGUUAACAACG   | 302  | 4   | Cleavage    | Symbols: TAFII15, TAF10, STG1   TBP-associated factor II 15   chr4:15353952-15356346 REVERSE LENGTH=868                                                                                                                                                                                                                                                                                                                                                                                                                                                                                                                                                                                                                                                                                                                                                                                                                                                                                                                                                                                                                                                                                                                                                                                                                                                                                                                                                                                                                                                                                                                                                                                                                                                                                                                                                                                                                                                                                                                                                                                                                                                                                                                                                                                                                                                                                                                                                                                                                                                                                                                                                                                                                                                                                                                                                                                                                                                                                                                                                                                                                                                                                                                                                                                                                                                                                                                                                                                                                                                                                                                                                                                                                                                                                                                                                                                                                                                                                                                                                                                                                                                                                                                                                                                                                                                                                                                                                                                                                                                                                                                                                                                                                                                                                                                                                                                                                                                                                                                                                                                                                                                                                                                                                                                                                                                                                                                                                                                                                                                                                                                                                                                                                                                                                                                                                                                                                                                                                                                                                                                                                                                                                         |
| AT4G31860 | UCCUUAUCCAGUUGAAGAACG  | 272  | 4.5 | Translation | Symbols:   Protein phosphatase 2C family protein   chr4:15406439-15409000 REVERSE LENGTH=1540                                                                                                                                                                                                                                                                                                                                                                                                                                                                                                                                                                                                                                                                                                                                                                                                                                                                                                                                                                                                                                                                                                                                                                                                                                                                                                                                                                                                                                                                                                                                                                                                                                                                                                                                                                                                                                                                                                                                                                                                                                                                                                                                                                                                                                                                                                                                                                                                                                                                                                                                                                                                                                                                                                                                                                                                                                                                                                                                                                                                                                                                                                                                                                                                                                                                                                                                                                                                                                                                                                                                                                                                                                                                                                                                                                                                                                                                                                                                                                                                                                                                                                                                                                                                                                                                                                                                                                                                                                                                                                                                                                                                                                                                                                                                                                                                                                                                                                                                                                                                                                                                                                                                                                                                                                                                                                                                                                                                                                                                                                                                                                                                                                                                                                                                                                                                                                                                                                                                                                                                                                                                                                   |
| AT4G31890 | AACAACUUGUUGAAGAACGCU  | 111  | 4   | Cleavage    | Symbols:   ARM repeat superfamily protein   chr4:15426292-15429107 REVERSE LENGTH=2041                                                                                                                                                                                                                                                                                                                                                                                                                                                                                                                                                                                                                                                                                                                                                                                                                                                                                                                                                                                                                                                                                                                                                                                                                                                                                                                                                                                                                                                                                                                                                                                                                                                                                                                                                                                                                                                                                                                                                                                                                                                                                                                                                                                                                                                                                                                                                                                                                                                                                                                                                                                                                                                                                                                                                                                                                                                                                                                                                                                                                                                                                                                                                                                                                                                                                                                                                                                                                                                                                                                                                                                                                                                                                                                                                                                                                                                                                                                                                                                                                                                                                                                                                                                                                                                                                                                                                                                                                                                                                                                                                                                                                                                                                                                                                                                                                                                                                                                                                                                                                                                                                                                                                                                                                                                                                                                                                                                                                                                                                                                                                                                                                                                                                                                                                                                                                                                                                                                                                                                                                                                                                                          |
| AT4G31950 | UGUGUGUACCUUCCACGUCU   | 112  | 4   | Cleavage    | Symbols: CYP82G3   cytochrome P450, family 82, subfamily C, polypeptide 3   chr4:15455163-15457121 FORWARD LENGTH=1570                                                                                                                                                                                                                                                                                                                                                                                                                                                                                                                                                                                                                                                                                                                                                                                                                                                                                                                                                                                                                                                                                                                                                                                                                                                                                                                                                                                                                                                                                                                                                                                                                                                                                                                                                                                                                                                                                                                                                                                                                                                                                                                                                                                                                                                                                                                                                                                                                                                                                                                                                                                                                                                                                                                                                                                                                                                                                                                                                                                                                                                                                                                                                                                                                                                                                                                                                                                                                                                                                                                                                                                                                                                                                                                                                                                                                                                                                                                                                                                                                                                                                                                                                                                                                                                                                                                                                                                                                                                                                                                                                                                                                                                                                                                                                                                                                                                                                                                                                                                                                                                                                                                                                                                                                                                                                                                                                                                                                                                                                                                                                                                                                                                                                                                                                                                                                                                                                                                                                                                                                                                                          |
| AT4G31970 | CUCAACAGUUGUAUAGGCGCU  | 110  | 4.5 | Translation | Symbols: CYP82C2   cytochrome P450, family 82, subfamily C, polypeptide 2   chr4:15462408-15464358 FORWARD LENGTH=1572                                                                                                                                                                                                                                                                                                                                                                                                                                                                                                                                                                                                                                                                                                                                                                                                                                                                                                                                                                                                                                                                                                                                                                                                                                                                                                                                                                                                                                                                                                                                                                                                                                                                                                                                                                                                                                                                                                                                                                                                                                                                                                                                                                                                                                                                                                                                                                                                                                                                                                                                                                                                                                                                                                                                                                                                                                                                                                                                                                                                                                                                                                                                                                                                                                                                                                                                                                                                                                                                                                                                                                                                                                                                                                                                                                                                                                                                                                                                                                                                                                                                                                                                                                                                                                                                                                                                                                                                                                                                                                                                                                                                                                                                                                                                                                                                                                                                                                                                                                                                                                                                                                                                                                                                                                                                                                                                                                                                                                                                                                                                                                                                                                                                                                                                                                                                                                                                                                                                                                                                                                                                          |
| AT4G32010 | UUCUGACUUGAGGUAGCGCU   | 355  | 4.5 | Cleavage    | Symbols: HSL1, HSL2-L1, VAL2   HSL2-like 1   chr4:15479524-15485353 FORWARD LENGTH=3468                                                                                                                                                                                                                                                                                                                                                                                                                                                                                                                                                                                                                                                                                                                                                                                                                                                                                                                                                                                                                                                                                                                                                                                                                                                                                                                                                                                                                                                                                                                                                                                                                                                                                                                                                                                                                                                                                                                                                                                                                                                                                                                                                                                                                                                                                                                                                                                                                                                                                                                                                                                                                                                                                                                                                                                                                                                                                                                                                                                                                                                                                                                                                                                                                                                                                                                                                                                                                                                                                                                                                                                                                                                                                                                                                                                                                                                                                                                                                                                                                                                                                                                                                                                                                                                                                                                                                                                                                                                                                                                                                                                                                                                                                                                                                                                                                                                                                                                                                                                                                                                                                                                                                                                                                                                                                                                                                                                                                                                                                                                                                                                                                                                                                                                                                                                                                                                                                                                                                                                                                                                                                                         |
| AT4G32030 | UAGAGUUAAGUUGGGACAGGA  | 199  | 4.5 | Cleavage    | Symbols:   unknown protein; BEST Arabidopsis thaliana protein match is: unknown protein (TAIR:AT1G15800.1); Has 35333 Blast hits to 34131 proteins in 2444 species: Archae - 798; Bacteria - 22429; Metazoa - 974; Fungi - 991; Plants - 531; Viruses - 0; Other Eukaryotes - 0 (source: NCBI BLink)   chr4:15544878-15547855 FORWARD LENGTH=2692                                                                                                                                                                                                                                                                                                                                                                                                                                                                                                                                                                                                                                                                                                                                                                                                                                                                                                                                                                                                                                                                                                                                                                                                                                                                                                                                                                                                                                                                                                                                                                                                                                                                                                                                                                                                                                                                                                                                                                                                                                                                                                                                                                                                                                                                                                                                                                                                                                                                                                                                                                                                                                                                                                                                                                                                                                                                                                                                                                                                                                                                                                                                                                                                                                                                                                                                                                                                                                                                                                                                                                                                                                                                                                                                                                                                                                                                                                                                                                                                                                                                                                                                                                                                                                                                                                                                                                                                                                                                                                                                                                                                                                                                                                                                                                                                                                                                                                                                                                                                                                                                                                                                                                                                                                                                                                                                                                                                                                                                                                                                                                                                                                                                                                                                                                                                                                               |
| AT4G32190 | AUUUACUACGACGACUUGU    | 200  | 4   | Translation | Symbols:   Myosin heavy chain-related protein   chr4:15544878-15547855 FORWARD LENGTH=2692                                                                                                                                                                                                                                                                                                                                                                                                                                                                                                                                                                                                                                                                                                                                                                                                                                                                                                                                                                                                                                                                                                                                                                                                                                                                                                                                                                                                                                                                                                                                                                                                                                                                                                                                                                                                                                                                                                                                                                                                                                                                                                                                                                                                                                                                                                                                                                                                                                                                                                                                                                                                                                                                                                                                                                                                                                                                                                                                                                                                                                                                                                                                                                                                                                                                                                                                                                                                                                                                                                                                                                                                                                                                                                                                                                                                                                                                                                                                                                                                                                                                                                                                                                                                                                                                                                                                                                                                                                                                                                                                                                                                                                                                                                                                                                                                                                                                                                                                                                                                                                                                                                                                                                                                                                                                                                                                                                                                                                                                                                                                                                                                                                                                                                                                                                                                                                                                                                                                                                                                                                                                                                      |
| AT4G32200 | UCAUCAUGAACUUAUUUGGU   | 103  | 2   | Cleavage    | Symbols: ASY2   DNA-binding HORMA family protein   chr4:15548840-15555094 FORWARD LENGTH=4332                                                                                                                                                                                                                                                                                                                                                                                                                                                                                                                                                                                                                                                                                                                                                                                                                                                                                                                                                                                                                                                                                                                                                                                                                                                                                                                                                                                                                                                                                                                                                                                                                                                                                                                                                                                                                                                                                                                                                                                                                                                                                                                                                                                                                                                                                                                                                                                                                                                                                                                                                                                                                                                                                                                                                                                                                                                                                                                                                                                                                                                                                                                                                                                                                                                                                                                                                                                                                                                                                                                                                                                                                                                                                                                                                                                                                                                                                                                                                                                                                                                                                                                                                                                                                                                                                                                                                                                                                                                                                                                                                                                                                                                                                                                                                                                                                                                                                                                                                                                                                                                                                                                                                                                                                                                                                                                                                                                                                                                                                                                                                                                                                                                                                                                                                                                                                                                                                                                                                                                                                                                                                                   |
| AT4G32320 | UUAACGAGACUUGAGCCAAUC  | 447  | 4.5 | Cleavage    | Symbols: APX6   ascorbate peroxidase 6   chr4:15600723-15605400 FORWARD LENGTH=1212                                                                                                                                                                                                                                                                                                                                                                                                                                                                                                                                                                                                                                                                                                                                                                                                                                                                                                                                                                                                                                                                                                                                                                                                                                                                                                                                                                                                                                                                                                                                                                                                                                                                                                                                                                                                                                                                                                                                                                                                                                                                                                                                                                                                                                                                                                                                                                                                                                                                                                                                                                                                                                                                                                                                                                                                                                                                                                                                                                                                                                                                                                                                                                                                                                                                                                                                                                                                                                                                                                                                                                                                                                                                                                                                                                                                                                                                                                                                                                                                                                                                                                                                                                                                                                                                                                                                                                                                                                                                                                                                                                                                                                                                                                                                                                                                                                                                                                                                                                                                                                                                                                                                                                                                                                                                                                                                                                                                                                                                                                                                                                                                                                                                                                                                                                                                                                                                                                                                                                                                                                                                                                             |
| AT4G32410 | UUAUGGAGUUGGAGAGUUGU   | 102  | 2   | Cleavage    | Symbols: CESA1, RSW1, ATCEA1   cellulose synthase 1   chr4:15640620-15646665 REVERSE LENGTH=3912                                                                                                                                                                                                                                                                                                                                                                                                                                                                                                                                                                                                                                                                                                                                                                                                                                                                                                                                                                                                                                                                                                                                                                                                                                                                                                                                                                                                                                                                                                                                                                                                                                                                                                                                                                                                                                                                                                                                                                                                                                                                                                                                                                                                                                                                                                                                                                                                                                                                                                                                                                                                                                                                                                                                                                                                                                                                                                                                                                                                                                                                                                                                                                                                                                                                                                                                                                                                                                                                                                                                                                                                                                                                                                                                                                                                                                                                                                                                                                                                                                                                                                                                                                                                                                                                                                                                                                                                                                                                                                                                                                                                                                                                                                                                                                                                                                                                                                                                                                                                                                                                                                                                                                                                                                                                                                                                                                                                                                                                                                                                                                                                                                                                                                                                                                                                                                                                                                                                                                                                                                                                                                |
| AT4G32440 | UUGUUAUUGUACGAGUACU    | 259  | 4.5 | Translation | Symbols:   Plant protein   chr4:15656885-15660223 FORWARD LENGTH=2207                                                                                                                                                                                                                                                                                                                                                                                                                                                                                                                                                                                                                                                                                                                                                                                                                                                                                                                                                                                                                                                                                                                                                                                                                                                                                                                                                                                                                                                                                                                                                                                                                                                                                                                                                                                                                                                                                                                                                                                                                                                                                                                                                                                                                                                                                                                                                                                                                                                                                                                                                                                                                                                                                                                                                                                                                                                                                                                                                                                                                                                                                                                                                                                                                                                                                                                                                                                                                                                                                                                                                                                                                                                                                                                                                                                                                                                                                                                                                                                                                                                                                                                                                                                                                                                                                                                                                                                                                                                                                                                                                                                                                                                                                                                                                                                                                                                                                                                                                                                                                                                                                                                                                                                                                                                                                                                                                                                                                                                                                                                                                                                                                                                                                                                                                                                                                                                                                                                                                                                                                                                                                                                           |
| AT4G32551 | CUUGGAGAGAAAGAAAGGCU   | 259  | 3   | Cleavage    | Symbols: LUG   U64 intercalation motif;WD40/YVTN repeat-like-containing domain   chr4:15707481-15713662 FORWARD LENGTH=3595                                                                                                                                                                                                                                                                                                                                                                                                                                                                                                                                                                                                                                                                                                                                                                                                                                                                                                                                                                                                                                                                                                                                                                                                                                                                                                                                                                                                                                                                                                                                                                                                                                                                                                                                                                                                                                                                                                                                                                                                                                                                                                                                                                                                                                                                                                                                                                                                                                                                                                                                                                                                                                                                                                                                                                                                                                                                                                                                                                                                                                                                                                                                                                                                                                                                                                                                                                                                                                                                                                                                                                                                                                                                                                                                                                                                                                                                                                                                                                                                                                                                                                                                                                                                                                                                                                                                                                                                                                                                                                                                                                                                                                                                                                                                                                                                                                                                                                                                                                                                                                                                                                                                                                                                                                                                                                                                                                                                                                                                                                                                                                                                                                                                                                                                                                                                                                                                                                                                                                                                                                                                     |
| AT4G32620 | UAUUAUACAACCAUUCUGGCC  | 310  | 3.5 | Cleavage    | Symbols:   Enhancer of polycomb-like transcription factor protein   chr4:15731508-15737272 FORWARD LENGTH=4925                                                                                                                                                                                                                                                                                                                                                                                                                                                                                                                                                                                                                                                                                                                                                                                                                                                                                                                                                                                                                                                                                                                                                                                                                                                                                                                                                                                                                                                                                                                                                                                                                                                                                                                                                                                                                                                                                                                                                                                                                                                                                                                                                                                                                                                                                                                                                                                                                                                                                                                                                                                                                                                                                                                                                                                                                                                                                                                                                                                                                                                                                                                                                                                                                                                                                                                                                                                                                                                                                                                                                                                                                                                                                                                                                                                                                                                                                                                                                                                                                                                                                                                                                                                                                                                                                                                                                                                                                                                                                                                                                                                                                                                                                                                                                                                                                                                                                                                                                                                                                                                                                                                                                                                                                                                                                                                                                                                                                                                                                                                                                                                                                                                                                                                                                                                                                                                                                                                                                                                                                                                                                  |
| AT4G32670 | UGAGCAAAUUGUUAUUCAGCC  | 113  | 4   | Cleavage    | Symbols:   RING/YVYE/PHD zinc finger superfamily protein   chr4:15759243-15762925 REVERSE LENGTH=2945                                                                                                                                                                                                                                                                                                                                                                                                                                                                                                                                                                                                                                                                                                                                                                                                                                                                                                                                                                                                                                                                                                                                                                                                                                                                                                                                                                                                                                                                                                                                                                                                                                                                                                                                                                                                                                                                                                                                                                                                                                                                                                                                                                                                                                                                                                                                                                                                                                                                                                                                                                                                                                                                                                                                                                                                                                                                                                                                                                                                                                                                                                                                                                                                                                                                                                                                                                                                                                                                                                                                                                                                                                                                                                                                                                                                                                                                                                                                                                                                                                                                                                                                                                                                                                                                                                                                                                                                                                                                                                                                                                                                                                                                                                                                                                                                                                                                                                                                                                                                                                                                                                                                                                                                                                                                                                                                                                                                                                                                                                                                                                                                                                                                                                                                                                                                                                                                                                                                                                                                                                                                                           |
| AT4G32730 | UUUCUGUUGUUGUGGCGCCAC  | 458  | 3.5 | Translation | Symbols: PC-MYB1, MYB3R-1, ATMYB3R-1, ATMYB3R1, MYB3R1   Homeodomain-like protein   chr4:15790345-15794252 FORWARD LENGTH=2639                                                                                                                                                                                                                                                                                                                                                                                                                                                                                                                                                                                                                                                                                                                                                                                                                                                                                                                                                                                                                                                                                                                                                                                                                                                                                                                                                                                                                                                                                                                                                                                                                                                                                                                                                                                                                                                                                                                                                                                                                                                                                                                                                                                                                                                                                                                                                                                                                                                                                                                                                                                                                                                                                                                                                                                                                                                                                                                                                                                                                                                                                                                                                                                                                                                                                                                                                                                                                                                                                                                                                                                                                                                                                                                                                                                                                                                                                                                                                                                                                                                                                                                                                                                                                                                                                                                                                                                                                                                                                                                                                                                                                                                                                                                                                                                                                                                                                                                                                                                                                                                                                                                                                                                                                                                                                                                                                                                                                                                                                                                                                                                                                                                                                                                                                                                                                                                                                                                                                                                                                                                                  |
| AT4G32760 | UGUGGAUAACAAGUACGACU   | 215  | 3.5 | Translation | Symbols:   ENTH/VHS/GAT family protein   chr4:15799077-15804173 FORWARD LENGTH=2671                                                                                                                                                                                                                                                                                                                                                                                                                                                                                                                                                                                                                                                                                                                                                                                                                                                                                                                                                                                                                                                                                                                                                                                                                                                                                                                                                                                                                                                                                                                                                                                                                                                                                                                                                                                                                                                                                                                                                                                                                                                                                                                                                                                                                                                                                                                                                                                                                                                                                                                                                                                                                                                                                                                                                                                                                                                                                                                                                                                                                                                                                                                                                                                                                                                                                                                                                                                                                                                                                                                                                                                                                                                                                                                                                                                                                                                                                                                                                                                                                                                                                                                                                                                                                                                                                                                                                                                                                                                                                                                                                                                                                                                                                                                                                                                                                                                                                                                                                                                                                                                                                                                                                                                                                                                                                                                                                                                                                                                                                                                                                                                                                                                                                                                                                                                                                                                                                                                                                                                                                                                                                                             |
| AT4G32770 | UAACAAGAACUUAUUUUUUUC  | 235  | 3   | Cleavage    | Symbols: VTE1, ATSDX1   tocopherol cyclase, chloroplast / vitamin E deficient 1 [VTE1] / sucrose export defective 1 [SDX1]   chr4:15804914-15807982 FORWARD LENGTH=1726                                                                                                                                                                                                                                                                                                                                                                                                                                                                                                                                                                                                                                                                                                                                                                                                                                                                                                                                                                                                                                                                                                                                                                                                                                                                                                                                                                                                                                                                                                                                                                                                                                                                                                                                                                                                                                                                                                                                                                                                                                                                                                                                                                                                                                                                                                                                                                                                                                                                                                                                                                                                                                                                                                                                                                                                                                                                                                                                                                                                                                                                                                                                                                                                                                                                                                                                                                                                                                                                                                                                                                                                                                                                                                                                                                                                                                                                                                                                                                                                                                                                                                                                                                                                                                                                                                                                                                                                                                                                                                                                                                                                                                                                                                                                                                                                                                                                                                                                                                                                                                                                                                                                                                                                                                                                                                                                                                                                                                                                                                                                                                                                                                                                                                                                                                                                                                                                                                                                                                                                                         |
| AT4G32820 | UACUGGAGGACGCUAACACU   | 176  | 3   | Cleavage    | Symbols:   Tetrairicopeptide repeat (TPR)-like superfamily protein   chr4:15831576-15841643 REVERSE LENGTH=5884                                                                                                                                                                                                                                                                                                                                                                                                                                                                                                                                                                                                                                                                                                                                                                                                                                                                                                                                                                                                                                                                                                                                                                                                                                                                                                                                                                                                                                                                                                                                                                                                                                                                                                                                                                                                                                                                                                                                                                                                                                                                                                                                                                                                                                                                                                                                                                                                                                                                                                                                                                                                                                                                                                                                                                                                                                                                                                                                                                                                                                                                                                                                                                                                                                                                                                                                                                                                                                                                                                                                                                                                                                                                                                                                                                                                                                                                                                                                                                                                                                                                                                                                                                                                                                                                                                                                                                                                                                                                                                                                                                                                                                                                                                                                                                                                                                                                                                                                                                                                                                                                                                                                                                                                                                                                                                                                                                                                                                                                                                                                                                                                                                                                                                                                                                                                                                                                                                                                                                                                                                                                                 |
| AT4G32850 | UUUGGACACAGUGGAGUGUG   | 104  | 4   | Cleavage    | Symbols: nPAP   nuclear poly(a) polymerase   chr4:15849780-15854709 FORWARD LENGTH=2813                                                                                                                                                                                                                                                                                                                                                                                                                                                                                                                                                                                                                                                                                                                                                                                                                                                                                                                                                                                                                                                                                                                                                                                                                                                                                                                                                                                                                                                                                                                                                                                                                                                                                                                                                                                                                                                                                                                                                                                                                                                                                                                                                                                                                                                                                                                                                                                                                                                                                                                                                                                                                                                                                                                                                                                                                                                                                                                                                                                                                                                                                                                                                                                                                                                                                                                                                                                                                                                                                                                                                                                                                                                                                                                                                                                                                                                                                                                                                                                                                                                                                                                                                                                                                                                                                                                                                                                                                                                                                                                                                                                                                                                                                                                                                                                                                                                                                                                                                                                                                                                                                                                                                                                                                                                                                                                                                                                                                                                                                                                                                                                                                                                                                                                                                                                                                                                                                                                                                                                                                                                                                                         |
| AT4G32850 | UUUGGACACAGUGGAGUGUG   | 104  | 4   | Cleavage    | Symbols: nPAP   nuclear poly(a) polymerase   chr4:15849780-15854460 FORWARD LENGTH=2786                                                                                                                                                                                                                                                                                                                                                                                                                                                                                                                                                                                                                                                                                                                                                                                                                                                                                                                                                                                                                                                                                                                                                                                                                                                                                                                                                                                                                                                                                                                                                                                                                                                                                                                                                                                                                                                                                                                                                                                                                                                                                                                                                                                                                                                                                                                                                                                                                                                                                                                                                                                                                                                                                                                                                                                                                                                                                                                                                                                                                                                                                                                                                                                                                                                                                                                                                                                                                                                                                                                                                                                                                                                                                                                                                                                                                                                                                                                                                                                                                                                                                                                                                                                                                                                                                                                                                                                                                                                                                                                                                                                                                                                                                                                                                                                                                                                                                                                                                                                                                                                                                                                                                                                                                                                                                                                                                                                                                                                                                                                                                                                                                                                                                                                                                                                                                                                                                                                                                                                                                                                                                                         |
| AT4G32920 | UACCCGCUAGCUGCCUACAAG  | 192  | 4.5 | Cleavage    | Symbols:   glycine-rich protein   chr4:15887270-15896006 REVERSE LENGTH=4763                                                                                                                                                                                                                                                                                                                                                                                                                                                                                                                                                                                                                                                                                                                                                                                                                                                                                                                                                                                                                                                                                                                                                                                                                                                                                                                                                                                                                                                                                                                                                                                                                                                                                                                                                                                                                                                                                                                                                                                                                                                                                                                                                                                                                                                                                                                                                                                                                                                                                                                                                                                                                                                                                                                                                                                                                                                                                                                                                                                                                                                                                                                                                                                                                                                                                                                                                                                                                                                                                                                                                                                                                                                                                                                                                                                                                                                                                                                                                                                                                                                                                                                                                                                                                                                                                                                                                                                                                                                                                                                                                                                                                                                                                                                                                                                                                                                                                                                                                                                                                                                                                                                                                                                                                                                                                                                                                                                                                                                                                                                                                                                                                                                                                                                                                                                                                                                                                                                                                                                                                                                                                                                    |
| AT4G32970 | UUUUUAUUACAAGUUGACGUC  | 133  | 3.5 | Cleavage    | Symbols:   unknown protein; BEST Arabidopsis thaliana protein match is: unknown protein (TAIR:AT4G32960.1); Has 552 Blast hits to 489 proteins in 85 species: Archae - 4; Bacteria - 14; Metazoa - 187; Fungi - 12; Plants - 225; Viruses - 0; Other Eukaryotes - 0 (source: NCBI BLink)   chr4:15926670-15931332 REVERSE LENGTH=3474                                                                                                                                                                                                                                                                                                                                                                                                                                                                                                                                                                                                                                                                                                                                                                                                                                                                                                                                                                                                                                                                                                                                                                                                                                                                                                                                                                                                                                                                                                                                                                                                                                                                                                                                                                                                                                                                                                                                                                                                                                                                                                                                                                                                                                                                                                                                                                                                                                                                                                                                                                                                                                                                                                                                                                                                                                                                                                                                                                                                                                                                                                                                                                                                                                                                                                                                                                                                                                                                                                                                                                                                                                                                                                                                                                                                                                                                                                                                                                                                                                                                                                                                                                                                                                                                                                                                                                                                                                                                                                                                                                                                                                                                                                                                                                                                                                                                                                                                                                                                                                                                                                                                                                                                                                                                                                                                                                                                                                                                                                                                                                                                                                                                                                                                                                                                                                                           |
| AT4G33010 | UUUGGUAUUCGUGAGUUGUUC  | 152  | 3   | Cleavage    | Symbols: ATGLDP1, GLDP1   glycine decarboxylase P-protein 1   chr4:15926670-15931332 REVERSE LENGTH=3474                                                                                                                                                                                                                                                                                                                                                                                                                                                                                                                                                                                                                                                                                                                                                                                                                                                                                                                                                                                                                                                                                                                                                                                                                                                                                                                                                                                                                                                                                                                                                                                                                                                                                                                                                                                                                                                                                                                                                                                                                                                                                                                                                                                                                                                                                                                                                                                                                                                                                                                                                                                                                                                                                                                                                                                                                                                                                                                                                                                                                                                                                                                                                                                                                                                                                                                                                                                                                                                                                                                                                                                                                                                                                                                                                                                                                                                                                                                                                                                                                                                                                                                                                                                                                                                                                                                                                                                                                                                                                                                                                                                                                                                                                                                                                                                                                                                                                                                                                                                                                                                                                                                                                                                                                                                                                                                                                                                                                                                                                                                                                                                                                                                                                                                                                                                                                                                                                                                                                                                                                                                                                        |
| AT4G33170 | AUGGUAUUUGAUCAUUGCGUC  | 196  | 5   | Cleavage    | Symbols:   Tetrairicopeptide repeat (TPR)-like superfamily protein   chr4:15995701-15998673 REVERSE LENGTH=2973                                                                                                                                                                                                                                                                                                                                                                                                                                                                                                                                                                                                                                                                                                                                                                                                                                                                                                                                                                                                                                                                                                                                                                                                                                                                                                                                                                                                                                                                                                                                                                                                                                                                                                                                                                                                                                                                                                                                                                                                                                                                                                                                                                                                                                                                                                                                                                                                                                                                                                                                                                                                                                                                                                                                                                                                                                                                                                                                                                                                                                                                                                                                                                                                                                                                                                                                                                                                                                                                                                                                                                                                                                                                                                                                                                                                                                                                                                                                                                                                                                                                                                                                                                                                                                                                                                                                                                                                                                                                                                                                                                                                                                                                                                                                                                                                                                                                                                                                                                                                                                                                                                                                                                                                                                                                                                                                                                                                                                                                                                                                                                                                                                                                                                                                                                                                                                                                                                                                                                                                                                                                                 |
| AT4G33310 | UGCCAUUGGCGAGAGCGCCU   | 164  | 5   | Translation | Symbols:   unknown protein; Has 5 Blast hits to 5 proteins in 10 species: Archae - 0; Bacteria - 0; Fungi - 0; Plants - 5; Viruses - 0; Other Eukaryotes - 0 (source: NCBI BLink)   chr4:16056156-16056416 FORWARD LENGTH=261                                                                                                                                                                                                                                                                                                                                                                                                                                                                                                                                                                                                                                                                                                                                                                                                                                                                                                                                                                                                                                                                                                                                                                                                                                                                                                                                                                                                                                                                                                                                                                                                                                                                                                                                                                                                                                                                                                                                                                                                                                                                                                                                                                                                                                                                                                                                                                                                                                                                                                                                                                                                                                                                                                                                                                                                                                                                                                                                                                                                                                                                                                                                                                                                                                                                                                                                                                                                                                                                                                                                                                                                                                                                                                                                                                                                                                                                                                                                                                                                                                                                                                                                                                                                                                                                                                                                                                                                                                                                                                                                                                                                                                                                                                                                                                                                                                                                                                                                                                                                                                                                                                                                                                                                                                                                                                                                                                                                                                                                                                                                                                                                                                                                                                                                                                                                                                                                                                                                                                   |
| AT4G33470 | UUUGAGUUGUUUUGGAGGUCU  | 141  | 4   | Cleavage    | Symbols: hda14, ATHDA14   histone deacetylase 14   chr4:16102595-16105493 REVERSE LENGTH=1505                                                                                                                                                                                                                                                                                                                                                                                                                                                                                                                                                                                                                                                                                                                                                                                                                                                                                                                                                                                                                                                                                                                                                                                                                                                                                                                                                                                                                                                                                                                                                                                                                                                                                                                                                                                                                                                                                                                                                                                                                                                                                                                                                                                                                                                                                                                                                                                                                                                                                                                                                                                                                                                                                                                                                                                                                                                                                                                                                                                                                                                                                                                                                                                                                                                                                                                                                                                                                                                                                                                                                                                                                                                                                                                                                                                                                                                                                                                                                                                                                                                                                                                                                                                                                                                                                                                                                                                                                                                                                                                                                                                                                                                                                                                                                                                                                                                                                                                                                                                                                                                                                                                                                                                                                                                                                                                                                                                                                                                                                                                                                                                                                                                                                                                                                                                                                                                                                                                                                                                                                                                                                                   |
| AT4G33680 | AUUUACUGGAGACGAGUUGUC  | 200  | 4.5 | Cleavage    | Symbols: AGS2   Pyridoxal phosphate (PLP)-dependent transferase superfamily protein   chr4:16171694-16174686 REVERSE LENGTH=1595                                                                                                                                                                                                                                                                                                                                                                                                                                                                                                                                                                                                                                                                                                                                                                                                                                                                                                                                                                                                                                                                                                                                                                                                                                                                                                                                                                                                                                                                                                                                                                                                                                                                                                                                                                                                                                                                                                                                                                                                                                                                                                                                                                                                                                                                                                                                                                                                                                                                                                                                                                                                                                                                                                                                                                                                                                                                                                                                                                                                                                                                                                                                                                                                                                                                                                                                                                                                                                                                                                                                                                                                                                                                                                                                                                                                                                                                                                                                                                                                                                                                                                                                                                                                                                                                                                                                                                                                                                                                                                                                                                                                                                                                                                                                                                                                                                                                                                                                                                                                                                                                                                                                                                                                                                                                                                                                                                                                                                                                                                                                                                                                                                                                                                                                                                                                                                                                                                                                                                                                                                                                |
| AT4G34020 | CGAGAGUAUACGAGGAGUUGUC | 318  | 4.5 | Cleavage    | Symbols:   Class I glutamine kinase superfamily protein   chr4:16286558-16300909 REVERSE LENGTH=1643                                                                                                                                                                                                                                                                                                                                                                                                                                                                                                                                                                                                                                                                                                                                                                                                                                                                                                                                                                                                                                                                                                                                                                                                                                                                                                                                                                                                                                                                                                                                                                                                                                                                                                                                                                                                                                                                                                                                                                                                                                                                                                                                                                                                                                                                                                                                                                                                                                                                                                                                                                                                                                                                                                                                                                                                                                                                                                                                                                                                                                                                                                                                                                                                                                                                                                                                                                                                                                                                                                                                                                                                                                                                                                                                                                                                                                                                                                                                                                                                                                                                                                                                                                                                                                                                                                                                                                                                                                                                                                                                                                                                                                                                                                                                                                                                                                                                                                                                                                                                                                                                                                                                                                                                                                                                                                                                                                                                                                                                                                                                                                                                                                                                                                                                                                                                                                                                                                                                                                                                                                                                                            |
| AT4G34090 | UGGCAUUGUUAUUGAUCAUUA  | 178  | 4.5 | Translation | Symbols:   unknown protein; FUNCTIONS IN: molecular_function unknown; INVOLVED IN: biological_process unknown; LOCATED IN: chloroplast; EXPRESSED DURING: 13 growth stages; BEST Arabidopsis thaliana protein match is: unknown protein (TAIR:AT4G34090.1); Has 100 Blast hits to 100 proteins in 85 species: Archae - 12; Bacteria - 1396; Metazoa - 17338; Fungi - 3422; Plants - 5037; Viruses - 0; Other Eukaryotes - 2996 (source: NCBI BLink)   chr4:16381506-16384194 REVERSE LENGTH=2561                                                                                                                                                                                                                                                                                                                                                                                                                                                                                                                                                                                                                                                                                                                                                                                                                                                                                                                                                                                                                                                                                                                                                                                                                                                                                                                                                                                                                                                                                                                                                                                                                                                                                                                                                                                                                                                                                                                                                                                                                                                                                                                                                                                                                                                                                                                                                                                                                                                                                                                                                                                                                                                                                                                                                                                                                                                                                                                                                                                                                                                                                                                                                                                                                                                                                                                                                                                                                                                                                                                                                                                                                                                                                                                                                                                                                                                                                                                                                                                                                                                                                                                                                                                                                                                                                                                                                                                                                                                                                                                                                                                                                                                                                                                                                                                                                                                                                                                                                                                                                                                                                                                                                                                                                                                                                                                                                                                                                                                                                                                                                                                                                                                                                                |
| AT4G34220 | CAUCAAGAACCGUAUUCUUCU  | 125  | 4   | Cleavage    | Symbols:   Leucine-rich repeat protein kinase family protein   chr4:16381506-16384194 REVERSE LENGTH=2561                                                                                                                                                                                                                                                                                                                                                                                                                                                                                                                                                                                                                                                                                                                                                                                                                                                                                                                                                                                                                                                                                                                                                                                                                                                                                                                                                                                                                                                                                                                                                                                                                                                                                                                                                                                                                                                                                                                                                                                                                                                                                                                                                                                                                                                                                                                                                                                                                                                                                                                                                                                                                                                                                                                                                                                                                                                                                                                                                                                                                                                                                                                                                                                                                                                                                                                                                                                                                                                                                                                                                                                                                                                                                                                                                                                                                                                                                                                                                                                                                                                                                                                                                                                                                                                                                                                                                                                                                                                                                                                                                                                                                                                                                                                                                                                                                                                                                                                                                                                                                                                                                                                                                                                                                                                                                                                                                                                                                                                                                                                                                                                                                                                                                                                                                                                                                                                                                                                                                                                                                                                                                       |
| AT4G34370 | AUAGCUAUAUUAUUAUUAUUA  | 426  | 3.5 | Cleavage    | Symbols: ATAR1L, AR11   RING/U-box superfamily protein   chr4:16434333-16437309 FORWARD LENGTH=2280                                                                                                                                                                                                                                                                                                                                                                                                                                                                                                                                                                                                                                                                                                                                                                                                                                                                                                                                                                                                                                                                                                                                                                                                                                                                                                                                                                                                                                                                                                                                                                                                                                                                                                                                                                                                                                                                                                                                                                                                                                                                                                                                                                                                                                                                                                                                                                                                                                                                                                                                                                                                                                                                                                                                                                                                                                                                                                                                                                                                                                                                                                                                                                                                                                                                                                                                                                                                                                                                                                                                                                                                                                                                                                                                                                                                                                                                                                                                                                                                                                                                                                                                                                                                                                                                                                                                                                                                                                                                                                                                                                                                                                                                                                                                                                                                                                                                                                                                                                                                                                                                                                                                                                                                                                                                                                                                                                                                                                                                                                                                                                                                                                                                                                                                                                                                                                                                                                                                                                                                                                                                                             |
| AT4G34540 | UUGUUGUUAUUGACAUCAAGCC | 128  | 3.5 | Translation | Symbols:   NmrA-like negative transcriptional regulator family protein   chr4:16498391-16502174 FORWARD LENGTH=2805                                                                                                                                                                                                                                                                                                                                                                                                                                                                                                                                                                                                                                                                                                                                                                                                                                                                                                                                                                                                                                                                                                                                                                                                                                                                                                                                                                                                                                                                                                                                                                                                                                                                                                                                                                                                                                                                                                                                                                                                                                                                                                                                                                                                                                                                                                                                                                                                                                                                                                                                                                                                                                                                                                                                                                                                                                                                                                                                                                                                                                                                                                                                                                                                                                                                                                                                                                                                                                                                                                                                                                                                                                                                                                                                                                                                                                                                                                                                                                                                                                                                                                                                                                                                                                                                                                                                                                                                                                                                                                                                                                                                                                                                                                                                                                                                                                                                                                                                                                                                                                                                                                                                                                                                                                                                                                                                                                                                                                                                                                                                                                                                                                                                                                                                                                                                                                                                                                                                                                                                                                                                             |
| AT4G34610 | UGUCU                  | 194  | 4   | Cleavage    | Symbols: BLH6   BEL1-like homeodomain 6   chr4:16530346-16533034 REVERSE LENGTH=2123                                                                                                                                                                                                                                                                                                                                                                                                                                                                                                                                                                                                                                                                                                                                                                                                                                                                                                                                                                                                                                                                                                                                                                                                                                                                                                                                                                                                                                                                                                                                                                                                                                                                                                                                                                                                                                                                                                                                                                                                                                                                                                                                                                                                                                                                                                                                                                                                                                                                                                                                                                                                                                                                                                                                                                                                                                                                                                                                                                                                                                                                                                                                                                                                                                                                                                                                                                                                                                                                                                                                                                                                                                                                                                                                                                                                                                                                                                                                                                                                                                                                                                                                                                                                                                                                                                                                                                                                                                                                                                                                                                                                                                                                                                                                                                                                                                                                                                                                                                                                                                                                                                                                                                                                                                                                                                                                                                                                                                                                                                                                                                                                                                                                                                                                                                                                                                                                                                                                                                                                                                                                                                            |
| AT4G34620 | UACAGAAUAGGCUUAAGUAAU  | 189  | 4   | Translation | Symbols: SSR16   small subunit ribosomal protein 16   chr4:16534855-16536171 REVERSE LENGTH=650                                                                                                                                                                                                                                                                                                                                                                                                                                                                                                                                                                                                                                                                                                                                                                                                                                                                                                                                                                                                                                                                                                                                                                                                                                                                                                                                                                                                                                                                                                                                                                                                                                                                                                                                                                                                                                                                                                                                                                                                                                                                                                                                                                                                                                                                                                                                                                                                                                                                                                                                                                                                                                                                                                                                                                                                                                                                                                                                                                                                                                                                                                                                                                                                                                                                                                                                                                                                                                                                                                                                                                                                                                                                                                                                                                                                                                                                                                                                                                                                                                                                                                                                                                                                                                                                                                                                                                                                                                                                                                                                                                                                                                                                                                                                                                                                                                                                                                                                                                                                                                                                                                                                                                                                                                                                                                                                                                                                                                                                                                                                                                                                                                                                                                                                                                                                                                                                                                                                                                                                                                                                                                 |
| AT4G34690 | UUUAGUAUUAUGGAUUAUUC   | 768  | 3   | Cleavage    | Symbols:   unknown protein; Has 9 Blast hits to 9 proteins in 3 species: Archae - 0; Bacteria - 0; Metazoa - 0; Fungi - 0; Plants - 8; Viruses - 0; Other Eukaryotes - 1 (source: NCBI BLink)   chr4:16555463-16556097 REVERSE LENGTH=624                                                                                                                                                                                                                                                                                                                                                                                                                                                                                                                                                                                                                                                                                                                                                                                                                                                                                                                                                                                                                                                                                                                                                                                                                                                                                                                                                                                                                                                                                                                                                                                                                                                                                                                                                                                                                                                                                                                                                                                                                                                                                                                                                                                                                                                                                                                                                                                                                                                                                                                                                                                                                                                                                                                                                                                                                                                                                                                                                                                                                                                                                                                                                                                                                                                                                                                                                                                                                                                                                                                                                                                                                                                                                                                                                                                                                                                                                                                                                                                                                                                                                                                                                                                                                                                                                                                                                                                                                                                                                                                                                                                                                                                                                                                                                                                                                                                                                                                                                                                                                                                                                                                                                                                                                                                                                                                                                                                                                                                                                                                                                                                                                                                                                                                                                                                                                                                                                                                                                       |
| AT4G34990 | UUUGAGAAUUCGCGUUAUUC   | 3917 | 4.5 | Translation | Symbols: ATMYB32, MYB32   myb domain protein 32   chr4:16661329-16662367 REVERSE LENGTH=944                                                                                                                                                                                                                                                                                                                                                                                                                                                                                                                                                                                                                                                                                                                                                                                                                                                                                                                                                                                                                                                                                                                                                                                                                                                                                                                                                                                                                                                                                                                                                                                                                                                                                                                                                                                                                                                                                                                                                                                                                                                                                                                                                                                                                                                                                                                                                                                                                                                                                                                                                                                                                                                                                                                                                                                                                                                                                                                                                                                                                                                                                                                                                                                                                                                                                                                                                                                                                                                                                                                                                                                                                                                                                                                                                                                                                                                                                                                                                                                                                                                                                                                                                                                                                                                                                                                                                                                                                                                                                                                                                                                                                                                                                                                                                                                                                                                                                                                                                                                                                                                                                                                                                                                                                                                                                                                                                                                                                                                                                                                                                                                                                                                                                                                                                                                                                                                                                                                                                                                                                                                                                                     |
| AT4G35025 | UUUGUAUUAUUAUUAUUAUUA  | 175  | 4.5 | Cleavage    | Symbols:   unknown protein; Has 30201 Blast hits to 17322 proteins in 780 species: Archae - 12; Bacteria - 1396; Metazoa - 17338; Fungi - 3422; Plants - 5037; Viruses - 0; Other Eukaryotes - 2996 (source: NCBI BLink)   chr4:16675528-1667574                                                                                                                                                                                                                                                                                                                                                                                                                                                                                                                                                                                                                                                                                                                                                                                                                                                                                                                                                                                                                                                                                                                                                                                                                                                                                                                                                                                                                                                                                                                                                                                                                                                                                                                                                                                                                                                                                                                                                                                                                                                                                                                                                                                                                                                                                                                                                                                                                                                                                                                                                                                                                                                                                                                                                                                                                                                                                                                                                                                                                                                                                                                                                                                                                                                                                                                                                                                                                                                                                                                                                                                                                                                                                                                                                                                                                                                                                                                                                                                                                                                                                                                                                                                                                                                                                                                                                                                                                                                                                                                                                                                                                                                                                                                                                                                                                                                                                                                                                                                                                                                                                                                                                                                                                                                                                                                                                                                                                                                                                                                                                                                                                                                                                                                                                                                                                                                                                                                                                |
| AT4G35090 | UGUGUGUUAUUAUUAUUAUUA  | 112  | 4   | Cleavage    | Symbols: CAT2   catalase 2   chr4:16700596-16703325 REVERSE LENGTH=1930                                                                                                                                                                                                                                                                                                                                                                                                                                                                                                                                                                                                                                                                                                                                                                                                                                                                                                                                                                                                                                                                                                                                                                                                                                                                                                                                                                                                                                                                                                                                                                                                                                                                                                                                                                                                                                                                                                                                                                                                                                                                                                                                                                                                                                                                                                                                                                                                                                                                                                                                                                                                                                                                                                                                                                                                                                                                                                                                                                                                                                                                                                                                                                                                                                                                                                                                                                                                                                                                                                                                                                                                                                                                                                                                                                                                                                                                                                                                                                                                                                                                                                                                                                                                                                                                                                                                                                                                                                                                                                                                                                                                                                                                                                                                                                                                                                                                                                                                                                                                                                                                                                                                                                                                                                                                                                                                                                                                                                                                                                                                                                                                                                                                                                                                                                                                                                                                                                                                                                                                                                                                                                                         |
| AT4G35180 | UACACGCGUUAUUAUUAUUAU  | 377  | 4.5 | Cleavage    | Symbols: LHT7   LYS/HIS transporter 7   chr4:16738339-16740465 REVERSE LENGTH=1695                                                                                                                                                                                                                                                                                                                                                                                                                                                                                                                                                                                                                                                                                                                                                                                                                                                                                                                                                                                                                                                                                                                                                                                                                                                                                                                                                                                                                                                                                                                                                                                                                                                                                                                                                                                                                                                                                                                                                                                                                                                                                                                                                                                                                                                                                                                                                                                                                                                                                                                                                                                                                                                                                                                                                                                                                                                                                                                                                                                                                                                                                                                                                                                                                                                                                                                                                                                                                                                                                                                                                                                                                                                                                                                                                                                                                                                                                                                                                                                                                                                                                                                                                                                                                                                                                                                                                                                                                                                                                                                                                                                                                                                                                                                                                                                                                                                                                                                                                                                                                                                                                                                                                                                                                                                                                                                                                                                                                                                                                                                                                                                                                                                                                                                                                                                                                                                                                                                                                                                                                                                                                                              |
| AT4G35335 | UUUGAAGGACCAAGAUCAAGU  | 351  | 3.5 | Cleavage    | Symbols:   Nucleotide-sugar transporter family protein   chr4:16807265-16810216 FORWARD LENGTH=1281                                                                                                                                                                                                                                                                                                                                                                                                                                                                                                                                                                                                                                                                                                                                                                                                                                                                                                                                                                                                                                                                                                                                                                                                                                                                                                                                                                                                                                                                                                                                                                                                                                                                                                                                                                                                                                                                                                                                                                                                                                                                                                                                                                                                                                                                                                                                                                                                                                                                                                                                                                                                                                                                                                                                                                                                                                                                                                                                                                                                                                                                                                                                                                                                                                                                                                                                                                                                                                                                                                                                                                                                                                                                                                                                                                                                                                                                                                                                                                                                                                                                                                                                                                                                                                                                                                                                                                                                                                                                                                                                                                                                                                                                                                                                                                                                                                                                                                                                                                                                                                                                                                                                                                                                                                                                                                                                                                                                                                                                                                                                                                                                                                                                                                                                                                                                                                                                                                                                                                                                                                                                                             |
| AT4G35440 | UUUGAAGGACCAAGAUCAAGU  | 351  | 4.5 | Translation | Symbols: CLC-E, ATCLC-E, CLCE   chloride channel E   chr4:16835986-16839375 REVERSE LENGTH=2561                                                                                                                                                                                                                                                                                                                                                                                                                                                                                                                                                                                                                                                                                                                                                                                                                                                                                                                                                                                                                                                                                                                                                                                                                                                                                                                                                                                                                                                                                                                                                                                                                                                                                                                                                                                                                                                                                                                                                                                                                                                                                                                                                                                                                                                                                                                                                                                                                                                                                                                                                                                                                                                                                                                                                                                                                                                                                                                                                                                                                                                                                                                                                                                                                                                                                                                                                                                                                                                                                                                                                                                                                                                                                                                                                                                                                                                                                                                                                                                                                                                                                                                                                                                                                                                                                                                                                                                                                                                                                                                                                                                                                                                                                                                                                                                                                                                                                                                                                                                                                                                                                                                                                                                                                                                                                                                                                                                                                                                                                                                                                                                                                                                                                                                                                                                                                                                                                                                                                                                                                                                                                                 |
| AT4G35480 | UAUUGAUUUUUGGCCUGAGGU  | 116  | 4.5 | Cleavage    | Symbols: RHA3B   RING-H2 finger A3B   chr4:16852074-16852947 REVERSE LENGTH=874                                                                                                                                                                                                                                                                                                                                                                                                                                                                                                                                                                                                                                                                                                                                                                                                                                                                                                                                                                                                                                                                                                                                                                                                                                                                                                                                                                                                                                                                                                                                                                                                                                                                                                                                                                                                                                                                                                                                                                                                                                                                                                                                                                                                                                                                                                                                                                                                                                                                                                                                                                                                                                                                                                                                                                                                                                                                                                                                                                                                                                                                                                                                                                                                                                                                                                                                                                                                                                                                                                                                                                                                                                                                                                                                                                                                                                                                                                                                                                                                                                                                                                                                                                                                                                                                                                                                                                                                                                                                                                                                                                                                                                                                                                                                                                                                                                                                                                                                                                                                                                                                                                                                                                                                                                                                                                                                                                                                                                                                                                                                                                                                                                                                                                                                                                                                                                                                                                                                                                                                                                                                                                                 |
| AT4G35520 | UUAACGAGUAGCUUAUUAUUA  | 1104 | 4   | Translation | Symbols: MLH3, ATMLH3   MUTL protein homolog 3   chr4:16865488-16871764 FORWARD LENGTH=3747                                                                                                                                                                                                                                                                                                                                                                                                                                                                                                                                                                                                                                                                                                                                                                                                                                                                                                                                                                                                                                                                                                                                                                                                                                                                                                                                                                                                                                                                                                                                                                                                                                                                                                                                                                                                                                                                                                                                                                                                                                                                                                                                                                                                                                                                                                                                                                                                                                                                                                                                                                                                                                                                                                                                                                                                                                                                                                                                                                                                                                                                                                                                                                                                                                                                                                                                                                                                                                                                                                                                                                                                                                                                                                                                                                                                                                                                                                                                                                                                                                                                                                                                                                                                                                                                                                                                                                                                                                                                                                                                                                                                                                                                                                                                                                                                                                                                                                                                                                                                                                                                                                                                                                                                                                                                                                                                                                                                                                                                                                                                                                                                                                                                                                                                                                                                                                                                                                                                                                                                                                                                                                     |
| AT4G35560 | UUAACGAGUAGCUUAUUAUUA  | 1483 | 4.5 | Cleavage    | Symbols:   Transducin/WD40 repeat-like superfamily protein   chr4:16881366-16887019 FORWARD LENGTH=3487                                                                                                                                                                                                                                                                                                                                                                                                                                                                                                                                                                                                                                                                                                                                                                                                                                                                                                                                                                                                                                                                                                                                                                                                                                                                                                                                                                                                                                                                                                                                                                                                                                                                                                                                                                                                                                                                                                                                                                                                                                                                                                                                                                                                                                                                                                                                                                                                                                                                                                                                                                                                                                                                                                                                                                                                                                                                                                                                                                                                                                                                                                                                                                                                                                                                                                                                                                                                                                                                                                                                                                                                                                                                                                                                                                                                                                                                                                                                                                                                                                                                                                                                                                                                                                                                                                                                                                                                                                                                                                                                                                                                                                                                                                                                                                                                                                                                                                                                                                                                                                                                                                                                                                                                                                                                                                                                                                                                                                                                                                                                                                                                                                                                                                                                                                                                                                                                                                                                                                                                                                                                                         |
| AT4G35600 | UUUGAGUUAUUAUUAUUAUUA  | 118  | 4.5 | Cleavage    | Symbols: CONNEXIN   connexin family protein   chr4:168989237-16900887 FORWARD LENGTH=1633                                                                                                                                                                                                                                                                                                                                                                                                                                                                                                                                                                                                                                                                                                                                                                                                                                                                                                                                                                                                                                                                                                                                                                                                                                                                                                                                                                                                                                                                                                                                                                                                                                                                                                                                                                                                                                                                                                                                                                                                                                                                                                                                                                                                                                                                                                                                                                                                                                                                                                                                                                                                                                                                                                                                                                                                                                                                                                                                                                                                                                                                                                                                                                                                                                                                                                                                                                                                                                                                                                                                                                                                                                                                                                                                                                                                                                                                                                                                                                                                                                                                                                                                                                                                                                                                                                                                                                                                                                                                                                                                                                                                                                                                                                                                                                                                                                                                                                                                                                                                                                                                                                                                                                                                                                                                                                                                                                                                                                                                                                                                                                                                                                                                                                                                                                                                                                                                                                                                                                                                                                                                                                       |
| AT4G35650 | UCCUGAGUUAUUAUUAUUAUUA | 209  | 3.5 | Cleavage    | Symbols: IDH-III   isocitrate dehydrogenase III   chr4:16908519-16910190 FORWARD LENGTH=1389                                                                                                                                                                                                                                                                                                                                                                                                                                                                                                                                                                                                                                                                                                                                                                                                                                                                                                                                                                                                                                                                                                                                                                                                                                                                                                                                                                                                                                                                                                                                                                                                                                                                                                                                                                                                                                                                                                                                                                                                                                                                                                                                                                                                                                                                                                                                                                                                                                                                                                                                                                                                                                                                                                                                                                                                                                                                                                                                                                                                                                                                                                                                                                                                                                                                                                                                                                                                                                                                                                                                                                                                                                                                                                                                                                                                                                                                                                                                                                                                                                                                                                                                                                                                                                                                                                                                                                                                                                                                                                                                                                                                                                                                                                                                                                                                                                                                                                                                                                                                                                                                                                                                                                                                                                                                                                                                                                                                                                                                                                                                                                                                                                                                                                                                                                                                                                                                                                                                                                                                                                                                                                    |
| AT4G35670 | UUUCAGACUAUUAUUAUUAUUA | 448  | 4   | Cleavage    | Symbols:   Pectin lyase-like superfamily protein   chr4:16914996-16917201 FORWARD LENGTH=1185                                                                                                                                                                                                                                                                                                                                                                                                                                                                                                                                                                                                                                                                                                                                                                                                                                                                                                                                                                                                                                                                                                                                                                                                                                                                                                                                                                                                                                                                                                                                                                                                                                                                                                                                                                                                                                                                                                                                                                                                                                                                                                                                                                                                                                                                                                                                                                                                                                                                                                                                                                                                                                                                                                                                                                                                                                                                                                                                                                                                                                                                                                                                                                                                                                                                                                                                                                                                                                                                                                                                                                                                                                                                                                                                                                                                                                                                                                                                                                                                                                                                                                                                                                                                                                                                                                                                                                                                                                                                                                                                                                                                                                                                                                                                                                                                                                                                                                                                                                                                                                                                                                                                                                                                                                                                                                                                                                                                                                                                                                                                                                                                                                                                                                                                                                                                                                                                                                                                                                                                                                                                                                   |
| AT4G35690 | UUGAGAGUUAUUAUUAUUAUUA | 141  | 3.5 | Translation | Symbols:   Nucleotide-binding protein of unknown function (DUF241)   chr4:169128103-16922963 FORWARD LENGTH=1161                                                                                                                                                                                                                                                                                                                                                                                                                                                                                                                                                                                                                                                                                                                                                                                                                                                                                                                                                                                                                                                                                                                                                                                                                                                                                                                                                                                                                                                                                                                                                                                                                                                                                                                                                                                                                                                                                                                                                                                                                                                                                                                                                                                                                                                                                                                                                                                                                                                                                                                                                                                                                                                                                                                                                                                                                                                                                                                                                                                                                                                                                                                                                                                                                                                                                                                                                                                                                                                                                                                                                                                                                                                                                                                                                                                                                                                                                                                                                                                                                                                                                                                                                                                                                                                                                                                                                                                                                                                                                                                                                                                                                                                                                                                                                                                                                                                                                                                                                                                                                                                                                                                                                                                                                                                                                                                                                                                                                                                                                                                                                                                                                                                                                                                                                                                                                                                                                                                                                                                                                                                                                |
| AT4G35740 | UGAGACACAACAGGAGAGAUUC | 244  | 3.5 | Cleavage    | Symbols: RecQ3, ATRECQ3   DEAD/DEAH box RNA helicase family protein   chr4:16936120-16940332 FORWARD LENGTH=2407                                                                                                                                                                                                                                                                                                                                                                                                                                                                                                                                                                                                                                                                                                                                                                                                                                                                                                                                                                                                                                                                                                                                                                                                                                                                                                                                                                                                                                                                                                                                                                                                                                                                                                                                                                                                                                                                                                                                                                                                                                                                                                                                                                                                                                                                                                                                                                                                                                                                                                                                                                                                                                                                                                                                                                                                                                                                                                                                                                                                                                                                                                                                                                                                                                                                                                                                                                                                                                                                                                                                                                                                                                                                                                                                                                                                                                                                                                                                                                                                                                                                                                                                                                                                                                                                                                                                                                                                                                                                                                                                                                                                                                                                                                                                                                                                                                                                                                                                                                                                                                                                                                                                                                                                                                                                                                                                                                                                                                                                                                                                                                                                                                                                                                                                                                                                                                                                                                                                                                                                                                                                                |
| AT4G35800 | UCCAUUUGUUGCAUUAUUAUUA | 138  | 3.5 | Translation | Symbols: NRPB1, RPB1, RNA_POL_III_LSRNA_POL_III_LSRNA_POL_III_LSRNA_POL_III_LSRNA_POL_III_LSRNA_POL_III_LSRNA_POL_III_LSRNA_POL_III_LSRNA_POL_III_LSRNA_POL_III_LSRNA_POL_III_LSRNA_POL_III_LSRNA_POL_III_LSRNA_POL_III_LSRNA_POL_III_LSRNA_POL_III_LSRNA_POL_III_LSRNA_POL_III_LSRNA_POL_III_LSRNA_POL_III_LSRNA_POL_III_LSRNA_POL_III_LSRNA_POL_III_LSRNA_POL_III_LSRNA_POL_III_LSRNA_POL_III_LSRNA_POL_III_LSRNA_POL_III_LSRNA_POL_III_LSRNA_POL_III_LSRNA_POL_III_LSRNA_POL_III_LSRNA_POL_III_LSRNA_POL_III_LSRNA_POL_III_LSRNA_POL_III_LSRNA_POL_III_LSRNA_POL_III_LSRNA_POL_III_LSRNA_POL_III_LSRNA_POL_III_LSRNA_POL_III_LSRNA_POL_III_LSRNA_POL_III_LSRNA_POL_III_LSRNA_POL_III_LSRNA_POL_III_LSRNA_POL_III_LSRNA_POL_III_LSRNA_POL_III_LSRNA_POL_III_LSRNA_POL_III_LSRNA_POL_III_LSRNA_POL_III_LSRNA_POL_III_LSRNA_POL_III_LSRNA_POL_III_LSRNA_POL_III_LSRNA_POL_III_LSRNA_POL_III_LSRNA_POL_III_LSRNA_POL_III_LSRNA_POL_III_LSRNA_POL_III_LSRNA_POL_III_LSRNA_POL_III_LSRNA_POL_III_LSRNA_POL_III_LSRNA_POL_III_LSRNA_POL_III_LSRNA_POL_III_LSRNA_POL_III_LSRNA_POL_III_LSRNA_POL_III_LSRNA_POL_III_LSRNA_POL_III_LSRNA_POL_III_LSRNA_POL_III_LSRNA_POL_III_LSRNA_POL_III_LSRNA_POL_III_LSRNA_POL_III_LSRNA_POL_III_LSRNA_POL_III_LSRNA_POL_III_LSRNA_POL_III_LSRNA_POL_III_LSRNA_POL_III_LSRNA_POL_III_LSRNA_POL_III_LSRNA_POL_III_LSRNA_POL_III_LSRNA_POL_III_LSRNA_POL_III_LSRNA_POL_III_LSRNA_POL_III_LSRNA_POL_III_LSRNA_POL_III_LSRNA_POL_III_LSRNA_POL_III_LSRNA_POL_III_LSRNA_POL_III_LSRNA_POL_III_LSRNA_POL_III_LSRNA_POL_III_LSRNA_POL_III_LSRNA_POL_III_LSRNA_POL_III_LSRNA_POL_III_LSRNA_POL_III_LSRNA_POL_III_LSRNA_POL_III_LSRNA_POL_III_LSRNA_POL_III_LSRNA_POL_III_LSRNA_POL_III_LSRNA_POL_III_LSRNA_POL_III_LSRNA_POL_III_LSRNA_POL_III_LSRNA_POL_III_LSRNA_POL_III_LSRNA_POL_III_LSRNA_POL_III_LSRNA_POL_III_LSRNA_POL_III_LSRNA_POL_III_LSRNA_POL_III_LSRNA_POL_III_LSRNA_POL_III_LSRNA_POL_III_LSRNA_POL_III_LSRNA_POL_III_LSRNA_POL_III_LSRNA_POL_III_LSRNA_POL_III_LSRNA_POL_III_LSRNA_POL_III_LSRNA_POL_III_LSRNA_POL_III_LSRNA_POL_III_LSRNA_POL_III_LSRNA_POL_III_LSRNA_POL_III_LSRNA_POL_III_LSRNA_POL_III_LSRNA_POL_III_LSRNA_POL_III_LSRNA_POL_III_LSRNA_POL_III_LSRNA_POL_III_LSRNA_POL_III_LSRNA_POL_III_LSRNA_POL_III_LSRNA_POL_III_LSRNA_POL_III_LSRNA_POL_III_LSRNA_POL_III_LSRNA_POL_III_LSRNA_POL_III_LSRNA_POL_III_LSRNA_POL_III_LSRNA_POL_III_LSRNA_POL_III_LSRNA_POL_III_LSRNA_POL_III_LSRNA_POL_III_LSRNA_POL_III_LSRNA_POL_III_LSRNA_POL_III_LSRNA_POL_III_LSRNA_POL_III_LSRNA_POL_III_LSRNA_POL_III_LSRNA_POL_III_LSRNA_POL_III_LSRNA_POL_III_LSRNA_POL_III_LSRNA_POL_III_LSRNA_POL_III_LSRNA_POL_III_LSRNA_POL_III_LSRNA_POL_III_LSRNA_POL_III_LSRNA_POL_III_LSRNA_POL_III_LSRNA_POL_III_LSRNA_POL_III_LSRNA_POL_III_LSRNA_POL_III_LSRNA_POL_III_LSRNA_POL_III_LSRNA_POL_III_LSRNA_POL_III_LSRNA_POL_III_LSRNA_POL_III_LSRNA_POL_III_LSRNA_POL_III_LSRNA_POL_III_LSRNA_POL_III_LSRNA_POL_III_LSRNA_POL_III_LSRNA_POL_III_LSRNA_POL_III_LSRNA_POL_III_LSRNA_POL_III_LSRNA_POL_III_LSRNA_POL_III_LSRNA_POL_III_LSRNA_POL_III_LSRNA_POL_III_LSRNA_POL_III_LSRNA_POL_III_LSRNA_POL_III_LSRNA_POL_III_LSRNA_POL_III_LSRNA_POL_III_LSRNA_POL_III_LSRNA_POL_III_LSRNA_POL_III_LSRNA_POL_III_LSRNA_POL_III_LSRNA_POL_III_LSRNA_POL_III_LSRNA_POL_III_LSRNA_POL_III_LSRNA_POL_III_LSRNA_POL_III_LSRNA_POL_III_LSRNA_POL_III_LSRNA_POL_III_LSRNA_POL_III_LSRNA_POL_III_LSRNA_POL_III_LSRNA_POL_III_LSRNA_POL_III_LSRNA_POL_III_LSRNA_POL_III_LSRNA_POL_III_LSRNA_POL_III_LSRNA_POL_III_LSRNA_POL_III_LSRNA_POL_III_LSRNA_POL_III_LSRNA_POL_III_LSRNA_POL_III_LSRNA_POL_III_LSRNA_POL_III_LSRNA_POL_III_LSRNA_POL_III_LSRNA_POL_III_LSRNA_POL_III_LSRNA_POL_III_LSRNA_POL_III_LSRNA_POL_III_LSRNA_POL_III_LSRNA_POL_III_LSRNA_POL_III_LSRNA_POL_III_LSRNA_POL_III_LSRNA_POL_III_LSRNA_POL_III_LSRNA_POL_III_LSRNA_POL_III_LSRNA_POL_III_LSRNA_POL_III_LSRNA_POL_III_LSRNA_POL_III_LSRNA_POL_III_LSRNA_POL_III_LSRNA_POL_III_LSRNA_POL_III_LSRNA_POL_III_LSRNA_POL_III_LSRNA_POL_III_LSRNA_POL_III_LSRNA_POL_III_LSRNA_POL_III_LSRNA_POL_III_LSRNA_POL_III_LSRNA_POL_III_LSRNA_POL_III_LSRNA_POL_III_LSRNA_POL_III_LSRNA_POL_III_LSRNA_POL_III_LSRNA_POL_III_LSRNA_POL_III_LSRNA_POL_III_LSRNA_POL_III_LSRNA_POL_III_LSRNA_POL_III_LSRNA_POL_III_LSRNA_POL_III_LSRNA_POL_III_LSRNA_POL_III_LSRNA_POL_III_LSRNA_POL_III_LSRNA_POL_III_LSRNA_POL_III_LSRNA_POL_III_LSRNA_POL_III_LSRNA_POL_III_LSRNA_POL_III_LSRNA_POL_III_LSRNA_POL_III_LSRNA_POL_III_LSRNA_POL_III_LSRNA_POL_III_LSRNA_POL_III_LSRNA_POL_III_LSRNA_POL_III_LSRNA_POL_III_LSRNA_POL_III_LSRNA_POL_III_LSRNA_POL_III_LSRNA_POL_III_LSRNA_POL_III_LSRNA_POL_III_LSRNA_POL_III_LSRNA_POL_III_LSRNA_POL_III_LSRNA_POL_III_LSRNA_POL_III_LSRNA_POL_III_LSRNA_POL_III_LSRNA_POL_III_LSRNA_POL_III_LSRNA_POL_III_LSRNA_POL_III_LSRNA_POL_III_LSRNA_POL_III_LSRNA_POL_III_LSRNA_POL_III_LSRNA_POL_III_LSRNA_POL_III_LSRNA_POL_III_LSRNA_POL_III_LSRNA_POL_III_LSRNA_POL_III_LSRNA_POL_III_LSRNA_POL_III_LSRNA_POL_III_LSRNA_POL_III_LSRNA_POL_III_LSRNA_POL_III_LSRNA_POL_III_LSRNA_POL_III_LSRNA_POL_III_LSRNA_POL_III_LSRNA_POL_III_LSRNA_POL_III_LSRNA_POL_III_LSRNA_POL_III_LSRNA_POL_III_LSRNA_POL_III_LSRNA_POL_III_LSRNA_POL_III_LSRNA_POL_III_LSRNA_POL_III_LSRNA_POL_III_LSRNA_POL_III_LSRNA_POL_III_LSRNA_POL_III_LSRNA_POL_III_LSRNA_POL_III_LSRNA_POL_III_LSRNA_POL_III_LSRNA_POL_III_LSRNA_POL_III_LSRNA_POL_III_LSRNA_POL_III_LSRNA_POL_III_LSRNA_POL_III_LSRNA_POL_III_LSRNA_POL_III_LSRNA_POL_III_LSRNA_POL_III_LSRNA_POL_III_LSRNA_POL_III_LSRNA_POL_III_LSRNA_POL_III_LSRNA_POL_III_LSRNA_POL_III_LSRNA_POL_III_LSRNA_POL_III_LSRNA_POL_III_LSRNA_POL_III_LSRNA_POL_III_LSRNA_POL_III_LSRNA_POL_III_LSRNA_POL_III_LSRNA_POL_III_LSRNA_POL_III_LSRNA_POL_III_LSRNA_POL_III_LSRNA_POL_III_LSRNA_POL_III_LSRNA_POL_III_LSRNA_POL_III_LSRNA_POL_III_LSRNA_POL_III_LSRNA_POL_III_LSRNA_POL_III_LSRNA_POL_III_LSRNA_POL_III_LSRNA_POL_III_LSRNA_POL_III_LSRNA_POL_III_LSRNA_POL_III_LSRNA_POL_III_LSRNA_POL_III_LSRNA_POL_III_LSRNA_POL_III_LSRNA_POL_III_LSRNA_POL_III_LSRNA_POL_III_LSRNA_POL_III_LSRNA_POL_III_LSRNA_POL_III_LSRNA_POL_III_LSRNA_POL_III_LSRNA_POL_III_LSRNA_POL |

|            |                         |       |                 |                                                                                                                                                                                                                                                     |
|------------|-------------------------|-------|-----------------|-----------------------------------------------------------------------------------------------------------------------------------------------------------------------------------------------------------------------------------------------------|
| AT4G38290  | UUAUGAGACUUAUGCCCAAGCU  | 3733  | 4 Translation   | Symbols:   Haemolysin-III related integral membrane protein   chr4:17942871-17944047 FORWARD LENGTH=465                                                                                                                                             |
| AT4G38350  | UUGGACACUCCUUGACCCGA    | 160   | 4 Translation   | Symbols:   Patched family protein   chr4:17958177-17966962 REVERSE LENGTH=4085                                                                                                                                                                      |
| AT4G38380  | UUGGAGAACUCCUUGACCCGA   | 122   | 5 Cleavage      | Symbols:   MATE efflux family protein   chr4:17971855-17975100 REVERSE LENGTH=1913                                                                                                                                                                  |
| AT4G38552  | UAGAUAACAAGAACUUCUUCU   | 107   | 3.5 Translation | Symbols:   Antidiabetic natural antisense gene, locus overlaps with AT4G38550   chr4:18025620-18028492 REVERSE LENGTH=2771                                                                                                                          |
| AT4G38560  | UUGGAGAACUCCUUGACCCGA   | 1272  | 4.5 Cleavage    | Symbols:   Arabidopsis phospholipase-like protein (PEARL4) family   chr4:18029196-18031333 FORWARD LENGTH=1787                                                                                                                                      |
| AT4G38640  | UUGGAGAACUCCUUGACCCGA   | 158   | 5 Cleavage      | Symbols:   Plasma-membrane choline transporter family protein   chr4:18059653-18062289 REVERSE LENGTH=2100                                                                                                                                          |
| AT4G38650  | UCCGGGAUUGUGUAGGAAGAUG  | 113   | 3 Translation   | Symbols:   Glycosyl hydrolase family 10 protein   chr4:18063166-18065849 FORWARD LENGTH=1980                                                                                                                                                        |
| AT4G38830  | UAGGUAACAAGAACUUCUUCU   | 1828  | 4.5 Cleavage    | Symbols:   CRK26   cysteine-rich RLK (RECEPTOR-like protein kinase) 26   chr4:18122326-18124943 FORWARD LENGTH=2011                                                                                                                                 |
| AT4G38920  | UUGGAGAGAUUAGUAGCCGCC   | 4887  | 4 Cleavage      | Symbols:   AVA-P3, ATVHA-C3, VHA-C3   vacuolar-type H(+)-ATPase C3   chr4:18147211-18149267 FORWARD LENGTH=1028                                                                                                                                     |
| AT4G38980  | UGACGGUUCAGAUUAGCAGAGC  | 107   | 3.5 Translation | Symbols:   unknown protein; Has 44 Blast hits to 44 proteins in 19 species: Archae - 0; Bacteria - 2; Metazoa - 2; Fungi - 8; Plants - 24; Viruses - 0; Other Eukaryotes - 8 (source: NCBI Blnk).   chr4:18166709-18168192 REVERSE LENGTH=1114      |
| AT4G39040  | UCCUGAGUACUUCUUCUCAA    | 209   | 4 Cleavage      | Symbols:   RNA-binding CRS1 / YhbY (CRM) domain protein   chr4:18189072-18190556 REVERSE LENGTH=1089                                                                                                                                                |
| AT4G39160  | UAUUUGAACUAUGGAUACCU    | 768   | 4.5 Translation | Symbols:   Homeodomain-like superfamily protein   chr4:18236792-18239818 FORWARD LENGTH=1916                                                                                                                                                        |
| AT4G39340  | UGACGGAAAGCUACAGAGGAUG  | 108   | 3.5 Cleavage    | Symbols:   Protein of unknown function (DUF1278)   chr4:18293129-18293512 REVERSE LENGTH=384                                                                                                                                                        |
| AT4G39350  | CUCAGGCUCAUUCUACGCAUC   | 968   | 4 Cleavage      | Symbols:   CES5A2, ATH-A, ATCESA2   cellulose synthase A2   chr4:18296797-18302192 FORWARD LENGTH=3838                                                                                                                                              |
| AT4G39400  | UAUAGGGCUUGAAGAAAGUUG   | 535   | 3 Cleavage      | Symbols:   BR1L, CB2, DWF2, BIN1, ATBR1   Leucine-rich receptor-like protein kinase family protein   chr4:18324661-18328826 FORWARD LENGTH=4166                                                                                                     |
| AT4G39480  | UGAGAAGAGAUAGAAUAGAAUC  | 103   | 3.5 Cleavage    | Symbols:   CYP96A9   cytochrome P450, family 96, subfamily A, polypeptide 9   chr4:18362258-18364209 FORWARD LENGTH=1952                                                                                                                            |
| AT4G39490  | UGAGAAGAGAUAGAAUAGAAUC  | 103   | 3 Cleavage      | Symbols:   CYP96A10   cytochrome P450, family 96, subfamily A, polypeptide 10   chr4:18365049-18366888 FORWARD LENGTH=1840                                                                                                                          |
| AT4G39590  | UUUGAGCACUCCUUGACCCGA   | 154   | 2.5 Cleavage    | Symbols:   Galactose oxidase/kelch repeat superfamily protein   chr4:18387331-18388732 REVERSE LENGTH=1402                                                                                                                                          |
| AT4G39690  | UGUUGAUCCAAGUAGUCACU    | 608   | 4 Cleavage      | Symbols:   FUNCTIONS IN: molecular_function unknown; INVOLVED IN: biological_process unknown; LOCATED IN: mitochondrion; EXPRESSED IN: 26 plant structures; EXPRESSED DURING: 14 growth stages; CONTAINS InterPro DOMAIN/s: Mito                    |
| AT4G39700  | UUAACUUCACCUUUGACU      | 380   | 4 Cleavage      | Symbols:   Heavy metal transport/detoxification superfamily protein   chr4:18424265-18424906 FORWARD LENGTH=477                                                                                                                                     |
| AT4G39756  | AUUGUGUAUUAUUUUGAGCCU   | 108   | 3 Cleavage      | Symbols:   Galactose oxidase/kelch repeat superfamily protein   chr4:18441756-18443000 FORWARD LENGTH=1195                                                                                                                                          |
| AT4G39850  | UGCAUAUUGGGACUUGAACCU   | 413   | 4 Cleavage      | Symbols:   PKA1, PED3, CTS, ACN2, AIAABC01   peroxisomal ABC transporter 1   chr4:18488519-18497136 FORWARD LENGTH=4722                                                                                                                             |
| AT4G39860  | UGCAUAUUGGGACUUGAACCU   | 187   | 3.5 Translation | Symbols:   Molecular chaperone Hsp40/DnaJ family protein   chr4:18533755-18536618 FORWARD LENGTH=1716                                                                                                                                               |
| AT4G40040  | UCAGUAAGAUUUGCAUUAUC    | 104   | 3.5 Cleavage    | Symbols:   Histone superfamily protein   chr4:18557387-18558743 REVERSE LENGTH=861                                                                                                                                                                  |
| ATSG01030  | UUUAUUCACACAGUGUACUGUG  | 118   | 4.5 Translation | Symbols:   Protein of unknown function (DUF3527)   chr5:5990-13235 FORWARD LENGTH=2728                                                                                                                                                              |
| ATSG01110  | UUGGACGCCUUAUUAUGAGA    | 679   | 4.5 Cleavage    | Symbols:   Tetratricopeptide repeat (TPR)-like superfamily protein   chr5:41768-44375 REVERSE LENGTH=2608                                                                                                                                           |
| ATSG01130  | UGGAUUCGGGCUAGAUUCCU    | 392   | 4.5 Translation | Symbols:   Protein of unknown function (DUF674)   chr5:47570-49512 FORWARD LENGTH=1686                                                                                                                                                              |
| ATSG01215  | UCCGCUAGAUUAUUAACAUC    | 281   | 2.5 Cleavage    | Symbols:   other RNA   chr5:84736-86215 REVERSE LENGTH=1480                                                                                                                                                                                         |
| ATSG01220  | UGACACCGAUUCUGAUUGCAU   | 377   | 4.5 Cleavage    | Symbols:   SQD2   sulfoquinovosyldiacylglycerol 2   chr5:86585-89986 REVERSE LENGTH=1956                                                                                                                                                            |
| ATSG01240  | UUAAGAGACUUAAGCCCAAGCU  | 3733  | 4 Cleavage      | Symbols:   LAX1   like AUXIN RESISTANT 1   chr5:98533-101835 FORWARD LENGTH=1699                                                                                                                                                                    |
| ATSG01550  | CUUGAGGAGAGAUAGACGCCGC  | 513   | 5 Cleavage      | Symbols:   LECRKAA.2   lectin receptor kinase a4.1   chr5:214517-216583 REVERSE LENGTH=2067                                                                                                                                                         |
| ATSG01560  | UUGGAGAGAUUAGUAGCCGCC   | 4887  | 4.5 Cleavage    | Symbols:   LECRKAA.3   lectin receptor kinase a4.3   chr5:218138-220530 REVERSE LENGTH=2393                                                                                                                                                         |
| ATSG01590  | UGACGGAAGCUACAGAGAGAU   | 108   | 3.5 Cleavage    | Symbols:   unknown protein; FUNCTIONS IN: molecular_function unknown; INVOLVED IN: biological_process unknown; LOCATED IN: chloroplast, chloroplast envelope; EXPRESSED IN: 22 plant structures; EXPRESSED DURING: 13 growth stages;                |
| ATSG01715  | UUUUGCUUAGACUUAAGAAUC   | 179   | 4 Cleavage      | Symbols:   pseudogene, antisense mRNA to gene AT5g01720, blast match of 29% identity and 3.2e-13 P-value to GP 12848653 dbj BAB28039.1   AK012109 unnamed protein product (Mus musculus)   chr5:267185-269354 FORWARD LENGTI                        |
| ATSG01740  | UAUGCAUAUUGGGACUUAACC   | 333   | 3.5 Cleavage    | Symbols:   Nuclear transport factor 2 (NTF2)   chr5:280722-281445 FORWARD LENGTH=724                                                                                                                                                                |
| ATSG01900  | UUGAACCAAGCCUGAUGAAGU   | 102   | 4.5 Translation | Symbols:   WRKY62, ATWRKY62   WRKY DNA-binding protein 62   chr5:351008-352069 REVERSE LENGTH=976                                                                                                                                                   |
| ATSG01920  | UGGGCCUACAUCUGCAAGGU    | 10625 | 3.5 Cleavage    | Symbols:   STN8   Protein kinase superfamily protein   chr5:359107-362904 FORWARD LENGTH=3489                                                                                                                                                       |
| ATSG01930  | UCAUUGAUUCUAGUUGCCCU    | 245   | 4 Translation   | Symbols:   MAN6, ATMAN6   Glycosyl hydrolase superfamily protein   chr5:361081-362901 REVERSE LENGTH=1489                                                                                                                                           |
| ATSG02050  | UGAGAACUCAAAGCACCCAAA   | 493   | 3.5 Cleavage    | Symbols:   Mitochondrial glycoprotein family protein   chr5:402987-404323 REVERSE LENGTH=1135                                                                                                                                                       |
| ATSG02070  | UAUGGCUUGGAGCAUAGCAUC   | 299   | 4.5 Cleavage    | Symbols:   Protein kinase family protein   chr5:405895-408320 REVERSE LENGTH=1974                                                                                                                                                                   |
| ATSG02080  | CUGAGGUACACAGGAUAUAGC   | 152   | 2.5 Cleavage    | Symbols:   DNA / pantothenate metabolism flavoprotein   chr5:409811-411557 FORWARD LENGTH=813                                                                                                                                                       |
| ATSG02170  | UUGAGAGAUCCUUGUUAUCUG   | 3917  | 3 Cleavage      | Symbols:   Transmembrane amino acid transporter family protein   chr5:427833-430695 FORWARD LENGTH=1635                                                                                                                                             |
| ATSG02220  | UUACAUGUUCUCCUUCUGAAGU  | 119   | 4.5 Cleavage    | Symbols:   unknown protein; Has 30201 Blast hits to 17322 proteins in 780 species: Archae - 12; Bacteria - 1396; Metazoa - 17338; Fungi - 3422; Plants - 5037; Viruses - 0; Other Eukaryotes - 2996 (source: NCBI Blnk).   chr5:441707-442146 RE    |
| ATSG02400  | UCUGAACCCUUGAUUUCUUCU   | 275   | 3.5 Cleavage    | Symbols:   PLL2   pol-like 2   chr5:513561-515896 FORWARD LENGTH=2025                                                                                                                                                                               |
| ATSG02480  | AUGGAUUUAUUAUUAUUAUUAU  | 196   | 4.5 Cleavage    | Symbols:   HSP20-like chaperones superfamily protein   chr5:547563-549912 FORWARD LENGTH=2350                                                                                                                                                       |
| ATSG02520  | UAUUCUUGUGUUAUUAUUAUUA  | 295   | 4 Cleavage      | Symbols:   CONTAINS InterPro DOMAIN/s: SANT associated (InterPro:IPR015216); BEST Arabidopsis thaliana protein match is: kinase interacting family protein (TAIR:AT1G58210.1); Has 842 Blast hits to 736 proteins in 154 species: Archae - 2; B     |
| ATSG02780  | UCGAGGGCAGGAAUAUAGGU    | 334   | 3.5 Cleavage    | Symbols:   GSTL1   glutathione transferase lambda 1   chr5:630876-632683 FORWARD LENGTH=987                                                                                                                                                         |
| ATSG02820  | UAUUGAGGUCAGAUUAGGACU   | 2734  | 4.5 Translation | Symbols:   RHL2, BAG3   Spo11/DNA topoisomerase VI, subunit A protein   chr5:642558-644394 FORWARD LENGTH=1655                                                                                                                                      |
| ATSG02960  | UGUGGAUUAACAAGUUGGGCU   | 111   | 3.5 Translation | Symbols:   Ribosomal protein S12/S23 family protein   chr5:693079-694515 REVERSE LENGTH=749                                                                                                                                                         |
| ATSG03180  | UAUUGCUUCUGUUGAUUCCACU  | 344   | 4 Cleavage      | Symbols:   RING/U-box superfamily protein   chr5:754016-756494 REVERSE LENGTH=1669                                                                                                                                                                  |
| ATSG03250  | UUUGGGUUUGGGUUAACUGCU   | 225   | 3 Cleavage      | Symbols:   Phototropic-responsive NPH3 family protein   chr5:774401-777048 FORWARD LENGTH=2162                                                                                                                                                      |
| ATSG03310  | CUCACAAGUUAUUAAGGGCU    | 208   | 3.5 Cleavage    | Symbols:   SAUR-like auxin-responsive protein family   chr5:799224-799706 REVERSE LENGTH=483                                                                                                                                                        |
| ATSG03330  | UCCUAUACAGUUGAAGAACGC   | 272   | 2 Translation   | Symbols:   Cysteine proteinases superfamily protein   chr5:807666-809763 FORWARD LENGTH=1288                                                                                                                                                        |
| ATSG03360  | UGAAGAACAAACUUGAGCAUAG  | 583   | 4 Translation   | Symbols:   DC1 domain-containing protein   chr5:817864-820139 FORWARD LENGTH=2276                                                                                                                                                                   |
| ATSG03406  | UUAUGAACCCUUGAAGAACU    | 102   | 5 Cleavage      | Symbols:   Class II aarB and biotin synthetase superfamily protein   chr5:839888-841875 FORWARD LENGTH=1304                                                                                                                                         |
| ATSG03520  | UGGAGAUUAUAGAUUUAUUGCC  | 126   | 3.5 Cleavage    | Symbols:   ATRAB6C, ATRABE1D, ATRAB-E1D, RAB-E1D, RAB8C   RAB GTPase homolog 8C   chr5:883463-885422 FORWARD LENGTH=1135                                                                                                                            |
| ATSG03540  | UUGACUUCAGACUCCGCGGUG   | 131   | 3.5 Translation | Symbols:   ATEXO70A1, EXO70A1   exocyst subunit exo70 family protein A1   chr5:889566-894167 FORWARD LENGTH=2208                                                                                                                                    |
| ATSG03610  | UUUAGGAUUUUGUUGCAUAUGCA | 1164  | 3.5 Cleavage    | Symbols:   GDSL-like Lipase/Acylhydrolase superfamily protein   chr5:915465-918485 FORWARD LENGTH=1424                                                                                                                                              |
| ATSG03630  | UCUGAAUCUCAAAGCACCCAAA  | 493   | 3.5 Cleavage    | Symbols:   ATMDAR2   Pyridine nucleotide-disulphide oxidoreductase family protein   chr5:922166-924683 REVERSE LENGTH=1587                                                                                                                          |
| ATSG03668  | UUGGAGAACUCCUUGACCCGA   | 1272  | 4.5 Translation | Symbols:   other RNA   chr5:947101-948967 REVERSE LENGTH=1667                                                                                                                                                                                       |
| ATSG03740  | UUCUCCUUGAUAUUCUUCUCCU  | 1646  | 3.5 Cleavage    | Symbols:   HD2C, HDT3   histone deacetylase 2C   chr5:981876-984200 FORWARD LENGTH=1242                                                                                                                                                             |
| ATSG03770  | UCCGCUAGAUUAUUAACAUC    | 281   | 3 Cleavage      | Symbols:   KDTA   KDO transferase A   chr5:995160-997848 FORWARD LENGTH=1601                                                                                                                                                                        |
| ATSG03900  | CUAGAUAUUCUUCUUAUUCUUCU | 235   | 4 Translation   | Symbols:   Iron-sulphur cluster biosynthesis family protein   chr5:1048295-1052387 FORWARD LENGTH=2013                                                                                                                                              |
| ATSG03940  | UGACACCGAUUCUGAUAGCUU   | 823   | 3.5 Cleavage    | Symbols:   FFC, 54CP, CPSRP54, SRP54CP   chloroplast signal recognition particle 54 kDa subunit   chr5:1060134-1063319 REVERSE LENGTH=1888                                                                                                          |
| ATSG04010  | UAUUGCUUCUGUUGAUUCCACU  | 344   | 4.5 Translation | Symbols:   F, S-CP family protein   chr5:1080105-1081074 REVERSE LENGTH=970                                                                                                                                                                         |
| ATSG04020  | UGAGACACAACAGGAGAUUUC   | 244   | 4.5 Cleavage    | Symbols:   calmodulin binding   chr5:1081611-1086546 REVERSE LENGTH=4780                                                                                                                                                                            |
| ATSG04040  | UUGAGAGACAUUCCACGACUGA  | 140   | 4.5 Translation | Symbols:   SDP1   Patatin-like phospholipase family protein   chr5:1089342-1093179 FORWARD LENGTH=3275                                                                                                                                              |
| ATSG04290  | UUUGUUAUACUUAUGGUCACCC  | 165   | 4 Cleavage      | Symbols:   KTF1, SPT5L   kow domain-containing transcription factor 1   chr5:1196069-1202653 FORWARD LENGTH=4482                                                                                                                                    |
| ATSG04320  | UGGGGCUCAACUUGCGGAGGAC  | 1187  | 4.5 Cleavage    | Symbols:   Shugoshin C Terminus   chr5:1209197-1212578 FORWARD LENGTH=1945                                                                                                                                                                          |
| ATSG040480 | UGGUAUUGAGCCUUGAGUAGU   | 149   | 3 Cleavage      | Symbols:   UOP-Glycosyltransferase superfamily protein   chr5:1271518-127796 REVERSE LENGTH=3629                                                                                                                                                    |
| ATSG04530  | UUUAUGACUUAAGCAGCCAGCU  | 149   | 4 Cleavage      | Symbols:   KC519   3-ketoacyl-CoA synthase 19   chr5:1291822-1293688 REVERSE LENGTH=1867                                                                                                                                                            |
| ATSG04540  | UGAGGUGUAGUUAUGAGCUGA   | 416   | 5 Cleavage      | Symbols:   Myotubularin-like phosphatases II superfamily   chr5:1296442-1302444 REVERSE LENGTH=3031                                                                                                                                                 |
| ATSG04620  | UGAGAAGCCUUGCCAUUGGA    | 158   | 4 Cleavage      | Symbols:   ATBIOF, BIOF   biotin F   chr5:1327213-1330091 FORWARD LENGTH=1667                                                                                                                                                                       |
| ATSG04660  | UACGUCUUGGAGAUUUGUUGCA  | 271   | 4 Translation   | Symbols:   CYP77A4   cytochrome P450, family 77, subfamily A, polypeptide 4   chr5:1335995-1337670 FORWARD LENGTH=1676                                                                                                                              |
| ATSG04680  | UUUGAGAGACUCCACCCGAGU   | 156   | 3.5 Translation | Symbols:   Ankyrin repeat family protein   chr5:1346238-1348857 REVERSE LENGTH=2165                                                                                                                                                                 |
| ATSG04710  | CGUCACUGGCAUUCUUGGAGG   | 272   | 5 Cleavage      | Symbols:   Zn-dependent exopeptidases superfamily protein   chr5:1356990-1360247 REVERSE LENGTH=1983                                                                                                                                                |
| ATSG04740  | UUGGACGUCUCUUAUAGAGA    | 437   | 4.5 Cleavage    | Symbols:   ACT domain-containing protein   chr5:1368542-1371480 REVERSE LENGTH=863                                                                                                                                                                  |
| ATSG04860  | UUUAUGAGACUUAAGCAGCCAGU | 149   | 5 Cleavage      | Symbols:   unknown protein; BEST Arabidopsis thaliana protein match is: unknown protein (TAIR:AT3G11760.1); Has 1807 Blast hits to 1807 proteins in 277 species: Archae - 0; Bacteria - 0; Metazoa - 736; Fungi - 347; Plants - 385; Viruses - 0; O |
| ATSG04870  | UAUUGACUUAUGGAUUAUUCU   | 768   | 5 Cleavage      | Symbols:   CPK1, ATPCK1   calcium dependent protein kinase 1   chr5:1416783-1420338 REVERSE LENGTH=2526                                                                                                                                             |
| ATSG04920  | UGACGCGCAUUCUGAAGAUCCU  | 154   | 4 Cleavage      | Symbols:   EAP30/Vps36 family protein   chr5:1438959-1441983 REVERSE LENGTH=1868                                                                                                                                                                    |
| ATSG05000  | UUUCUACAGCUGGAUAGAGCU   | 265   | 2.5 Cleavage    | Symbols:   TOC34, ATTOC34, OEP34   translocon at the outer envelope membrane of chloroplasts 34   chr5:1474113-1476019 REVERSE LENGTH=1142                                                                                                          |
| ATSG05010  | UAGAGUUAAGUUGGACAGAGA   | 199   | 2.5 Cleavage    | Symbols:   clathrin adaptor complexes medium subunit family protein   chr5:1476673-1480197 FORWARD LENGTH=2070                                                                                                                                      |
| ATSG05200  | AAAGUCAAAGACCCCAACCU    | 201   | 2.5 Cleavage    | Symbols:   Protein kinase superfamily protein   chr5:1544007-1547164 REVERSE LENGTH=1904                                                                                                                                                            |
| ATSG05280  | UUGCAGAGAUUGGAUUAACAAC  | 101   | 3.5 Cleavage    | Symbols:   RING/U-box superfamily protein   chr5:1565447-1566391 REVERSE LENGTH=945                                                                                                                                                                 |
| ATSG05282  | UUGCAGAGAUUGGAUUAACAAC  | 101   | 3.5 Cleavage    | Symbols:   CpuDrf64   conserved peptide upstream open reading frame 64   chr5:1565447-1566391 REVERSE LENGTH=945                                                                                                                                    |
| ATSG05470  | UGAGCGCAAUUCUUAAGAUCU   | 154   | 4 Cleavage      | Symbols:   EIF2 ALPHA, ATEIF2-A2, EIF2-A2   eukaryotic translation initiation factor 2 alpha subunit   chr5:1620458-1622340 FORWARD LENGTH=1282                                                                                                     |
| ATSG05657  | UUAUGCCGAGUAGUAGACAC    | 461   | 4.5 Cleavage    | Symbols:   BEST Arabidopsis thaliana protein match is: Late embryogenesis abundant (LEA) hydroxyproline-rich glycoprotein family (TAIR:AT5G06330.1); Has 30201 Blast hits to 17322 proteins in 780 species: Archae - 12; Bacteria - 1396; Metaz     |
| ATSG05690  | UUUGGGUUUGGGUUAACUGCU   | 225   | 3.5 Cleavage    | Symbols:   CPD, CYP90A, CYP90, CB83, DWF3, CYP90A1   Cytochrome P450 superfamily protein   chr5:1702688-1706787 REVERSE LENGTH=1635                                                                                                                 |
| ATSG05730  | UCUGUAUGCAUUAUUGGGAC    | 1212  | 4 Cleavage      | Symbols:   ASA1, TRPS, AMT1, WE12, JDL1   anthranilate synthase alpha subunit 1   chr5:1719557-1722903 REVERSE LENGTH=2063                                                                                                                          |

|           |                          |       |     |             |                                                                                                                                                                                                                                               |
|-----------|--------------------------|-------|-----|-------------|-----------------------------------------------------------------------------------------------------------------------------------------------------------------------------------------------------------------------------------------------|
| AT5G05760 | UGACACCGAUUCUGAUUGCAU    | 377   | 4   | Cleavage    | Symbols: SYP31, ATSEDS, ATSP31, SED5   syntaxin of plants 31   chr5:1728893-1731021 REVERSE LENGTH=1347                                                                                                                                       |
| AT5G05880 | UACCCGCUAGCUGCGCUUACAAG  | 3223  | 4.5 | Cleavage    | Symbols:   UDP-Glycosyltransferase superfamily protein   chr5:1769648-1771515 FORWARD LENGTH=1356                                                                                                                                             |
| AT5G05890 | UACCCGCUAGCUGCGCUUACAAG  | 3223  | 4   | Cleavage    | Symbols:   UDP-Glycosyltransferase superfamily protein   chr5:1772543-1774113 FORWARD LENGTH=1493                                                                                                                                             |
| AT5G05900 | UACCCGCUAGCUGCGCUUACAAG  | 3223  | 4.5 | Cleavage    | Symbols:   UDP-Glycosyltransferase superfamily protein   chr5:1774513-1776381 FORWARD LENGTH=1353                                                                                                                                             |
| AT5G05960 | UCACUCGACACCAAGGCGG      | 106   | 4   | Translation | Symbols:   Bifunctional inhibitor/lipid-transfer protein/seed storage 2S albumin superfamily protein   chr5:1790231-1790833 FORWARD LENGTH=515                                                                                                |
| AT5G06050 | UUACGAGACUCUAGCCAGCAG    | 3733  | 3.5 | Translation | Symbols:   Putative methyltransferase family protein   chr5:1820132-1823771 FORWARD LENGTH=2312                                                                                                                                               |
| AT5G06260 | UAGAGUUAAGUUGGACAGAGA    | 199   | 4   | Cleavage    | Symbols:   TUD-domain containing nuclear protein   chr5:1902599-1905101 REVERSE LENGTH=1697                                                                                                                                                   |
| AT5G06510 | UGAGCGUUCAGAUUAGGAGAGC   | 107   | 4   | Translation | Symbols: NF-YA10   nuclear factor Y, subunit A10   chr5:1984991-1987044 FORWARD LENGTH=1362                                                                                                                                                   |
| AT5G06540 | UCUGGUAUGCAUACUUGGCGU    | 1212  | 3.5 | Cleavage    | Symbols:   Pentapeptide repeat (PPR) superfamily protein   chr5:1999181-2001049 REVERSE LENGTH=1869                                                                                                                                           |
| AT5G06660 | AUACAUCUCGGAUCAAACCCU    | 222   | 4   | Cleavage    | Symbols:   Protein of unknown function DUF106, transmembrane   chr5:2046810-2047794 FORWARD LENGTH=985                                                                                                                                        |
| AT5G06780 | UCGAGGGGAGGAAACAUUGACU   | 334   | 3.5 | Cleavage    | Symbols:   Emsy N Terminus (ENT)/ plant Tudor-like domains-containing protein   chr5:2093883-2097043 REVERSE LENGTH=1489                                                                                                                      |
| AT5G06850 | AUGGAUUUAGAUCAUUGCGGCU   | 196   | 4   | Cleavage    | Symbols:   C2 calcium/lipid-binding plant phosphoribosyltransferase family protein   chr5:2126975-2130443 REVERSE LENGTH=3081                                                                                                                 |
| AT5G06930 | UGGCGCUACAACUCUGCAAGGU   | 10625 | 4   | Cleavage    | Symbols:   LOCATED IN: chloroplast; EXPRESSED IN: 15 plant structures; EXPRESSED DURING: 7 growth stages; BEST Arabidopsis thaliana protein match is: nucleolar protein gar2-related (TAIR:AT2G42320.2); Has 3369 Blast hits to 1526 proteins |
| AT5G06960 | UGCAUCUGCUAGGUCUGCGAG    | 378   | 3.5 | Translation | Symbols:   OBFS, TGA5   OCS-element binding factor 5   chr5:2154822-2157646 FORWARD LENGTH=1528                                                                                                                                               |
| AT5G06970 | UACACUCACUUGAUUAGGAG     | 223   | 4.5 | Cleavage    | Symbols:   Protein of unknown function (DUF810)   chr5:2158228-2166398 REVERSE LENGTH=3781                                                                                                                                                    |
| AT5G07010 | UACAUAUUGAGCAUCCUCCUG    | 156   | 5   | Cleavage    | Symbols:   ATST2A, ST2A   sulfotransferase 2A   chr5:2174678-2176106 REVERSE LENGTH=1429                                                                                                                                                      |
| AT5G07150 | CUCGGGAGAAAGAGAAGGCU     | 259   | 3.5 | Cleavage    | Symbols:   Leucine-rich repeat protein kinase family protein   chr5:2215820-2217983 FORWARD LENGTH=1662                                                                                                                                       |
| AT5G07180 | CAAAUCGGACAGCUACUUGCU    | 324   | 5   | Cleavage    | Symbols:   ERL2   ERECTA-like 2   chr5:2227571-2233417 REVERSE LENGTH=3305                                                                                                                                                                    |
| AT5G07250 | UGUGACACCGAUUCUGAUAGC    | 115   | 4   | Cleavage    | Symbols:   ATRBL3, RBL3   RHOMBROID-like protein 3   chr5:2274260-2275990 REVERSE LENGTH=1132                                                                                                                                                 |
| AT5G07290 | CUUCUUCAGAGAUGAUCCUUC    | 132   | 2.5 | Cleavage    | Symbols:   AML4, ML4   MEIZ-like 4   chr5:2293353-2298976 FORWARD LENGTH=3695                                                                                                                                                                 |
| AT5G07350 | UUUGGAGGUCUACUACUAGAGA   | 437   | 4   | Cleavage    | Symbols:   Tudor1, ATdudor1, TSN1   TUDOR-SN protein 1   chr5:2320021-2325419 REVERSE LENGTH=3182                                                                                                                                             |
| AT5G07440 | UUUGAGCGGCUUACUUAUGAGA   | 679   | 4.5 | Cleavage    | Symbols:   GDH2   glutamate dehydrogenase 2   chr5:2355940-2358194 FORWARD LENGTH=1520                                                                                                                                                        |
| AT5G07480 | UCUAUAUAGAUUUGGCUAGACC   | 103   | 5   | Cleavage    | Symbols:   KUP1   KARUP oxidoreductase 1   chr5:2367167-2369554 FORWARD LENGTH=1023                                                                                                                                                           |
| AT5G07560 | UGUGGAUAACAAGAGUGGCGCU   | 215   | 4   | Cleavage    | Symbols:   GRP20, ATRP20   glycine-rich protein 20   chr5:2390207-2391075 REVERSE LENGTH=754                                                                                                                                                  |
| AT5G07630 | UUUAUACAAGUAGCUGACUUC    | 2805  | 3.5 | Cleavage    | Symbols:   Lipid transporters   chr5:2410703-2414711 FORWARD LENGTH=2024                                                                                                                                                                      |
| AT5G07660 | AUUUUCAGUGAGCAUGUACUC    | 200   | 5   | Cleavage    | Symbols:   SMC6A   structural maintenance of chromosomes 6A   chr5:2422839-2429912 FORWARD LENGTH=3177                                                                                                                                        |
| AT5G07670 | UAUCUUGAGAGCGGUGCUGGCG   | 334   | 5   | Cleavage    | Symbols:   RNI-like superfamily protein   chr5:2430146-2432196 FORWARD LENGTH=1837                                                                                                                                                            |
| AT5G07710 | UUUGGCGACGCAUUCUGAAAG    | 334   | 2   | Cleavage    | Symbols:   Polynucleotidyl transferase, ribonuclease H-like superfamily protein   chr5:2453135-2455546 FORWARD LENGTH=1771                                                                                                                    |
| AT5G07770 | UAGAUAACAGGAACUUCUUCU    | 107   | 3.5 | Cleavage    | Symbols:   Actin-binding FH2 protein   chr5:2474684-2479402 FORWARD LENGTH=2600                                                                                                                                                               |
| AT5G07790 | UUUCUGAGCAGCAGUUCUUCU    | 302   | 3   | Translation | Symbols:   unknown protein; FUNCTIONS IN: molecular_function unknown; INVOLVED IN: biological_process unknown; LOCATED IN: cellular_component unknown; BEST Arabidopsis thaliana protein match is: unknown protein (TAIR:AT5G6130             |
| AT5G07990 | UGACGGAAGCUAGAGAGUAUUC   | 108   | 4   | Translation | Symbols:   T77, CYP75B1, D501   Cytochrome P450 superfamily protein   chr5:2560394-2563109 FORWARD LENGTH=1835                                                                                                                                |
| AT5G08020 | UGUGGUGUACCUUCACGCUUC    | 112   | 4.5 | Cleavage    | Symbols:   ATPA70B, RPA70B   RPA70-kDa subunit B   chr5:2572107-2574879 FORWARD LENGTH=1815                                                                                                                                                   |
| AT5G08030 | CGGAUUCUGAUUGGAGUGUGGU   | 186   | 3   | Cleavage    | Symbols:   PLC-like phosphodiesterases superfamily protein   chr5:2575033-2576783 REVERSE LENGTH=1251                                                                                                                                         |
| AT5G08080 | UUUCUUAUGCAUGUGUGUGUACC  | 110   | 3   | Cleavage    | Symbols:   SYP132, ATSPY132   syntaxin of plants 132   chr5:2588342-2591316 FORWARD LENGTH=1315                                                                                                                                               |
| AT5G08185 | UUUUUCGGACUAGAUAUGGACU   | 107   | 4.5 | Cleavage    | Symbols:   MIR162A   microRNA162A   chr5:2634101-2635436 REVERSE LENGTH=580                                                                                                                                                                   |
| AT5G08200 | UUAGAGAUUCCCCUGUUAUCUG   | 106   | 4   | Cleavage    | Symbols:    peptidoglycan-binding LysM domain-containing protein   chr5:2638036-2640824 FORWARD LENGTH=1895                                                                                                                                   |
| AT5G08315 | UUAGAGAUUCCCCUGUUAUCUG   | 106   | 4   | Translation | Symbols:   Defensin-like (DEF) family protein   chr5:2676177-2676580 REVERSE LENGTH=249                                                                                                                                                       |
| AT5G08430 | UGACGGAAGCUACAGAGGAGUG   | 108   | 3.5 | Translation | Symbols:   SWIB/MDM2 domain;Plus 3;GYF   chr5:2716700-2720212 FORWARD LENGTH=2053                                                                                                                                                             |
| AT5G08450 | UACAGCAUAGGCUUAAGUAUAC   | 189   | 4.5 | Cleavage    | Symbols:   FUNCTIONS IN: molecular_function unknown; INVOLVED IN: biological_process unknown; LOCATED IN: cellular_component unknown; EXPRESSED IN: 25 plant structures; EXPRESSED DURING: 15 growth stages; CONTAINS InterPro D1             |
| AT5G08480 | AACAANAUCUGUUAACAAGGCU   | 111   | 3   | Translation | Symbols:   VQ motif-containing protein   chr5:2743620-2745111 FORWARD LENGTH=918                                                                                                                                                              |
| AT5G08535 | UUUAGCUGAGGUGUAGGACCGG   | 213   | 4.5 | Cleavage    | Symbols:   D111/G-patch domain-containing protein   chr5:2762029-2763432 FORWARD LENGTH=786                                                                                                                                                   |
| AT5G08540 | UAAGCAUUIUGAUUAGUACCCGGA | 285   | 3.5 | Cleavage    | Symbols:   unknown protein; FUNCTIONS IN: molecular_function unknown; INVOLVED IN: biological_process unknown; LOCATED IN: chloroplast thylakoid membrane, chloroplast, chloroplast envelope; EXPRESSED IN: 24 plant structures; EXPRI        |
| AT5G08650 | CCUGAGGCUAGUAGCAGGUAUUC  | 270   | 4.5 | Cleavage    | Symbols:   Small GTP-binding protein   chr5:2806323-2813264 REVERSE LENGTH=2300                                                                                                                                                               |
| AT5G09350 | CAUCAAGAACCGGCUACGACCU   | 125   | 4   | Cleavage    | Symbols:   PI4KBETA2, PI4KBETA2   phosphatidylinositol 4-OH kinase beta2   chr5:2899123-2906146 REVERSE LENGTH=4129                                                                                                                           |
| AT5G09410 | UCACUUGUGCUGAAGCAUUGUAC  | 138   | 4   | Cleavage    | Symbols:   EICB-P, CAMTA1   ethylene induced calmodulin binding protein   chr5:2921268-2927416 FORWARD LENGTH=3284                                                                                                                            |
| AT5G09440 | UAGUGAACCCGAGUAGUACACC   | 461   | 4.5 | Cleavage    | Symbols:   EXLX   EXORDIUM like 4   chr5:2938347-2939461 FORWARD LENGTH=1115                                                                                                                                                                  |
| AT5G09550 | CUUCCCUAGAAUUCUUUCCUCC   | 401   | 3.5 | Cleavage    | Symbols:   GDP dissociation inhibitor family protein / Rab GTPase activator family protein   chr5:2963777-2966727 FORWARD LENGTH=1673                                                                                                         |
| AT5G09640 | UCAUCUGCAGUAAGUCCUGGCA   | 104   | 3.5 | Cleavage    | Symbols:   SNG2, SCPL19   serine carboxypeptidase-like 19   chr5:2988314-2991156 FORWARD LENGTH=1647                                                                                                                                          |
| AT5G09690 | UUUCUAGGAGCAAGAUACAGCU   | 351   | 4   | Cleavage    | Symbols:   ATMTG7, MGT7, MRS2-7   magnesium transporter 7   chr5:3000809-3003262 REVERSE LENGTH=1413                                                                                                                                          |
| AT5G09820 | UGGCAUCGAUUUGAUUAGUACU   | 178   | 3.5 | Cleavage    | Symbols:   Plastid-lipid associated protein PAP / fibrillin family protein   chr5:3055779-3057447 REVERSE LENGTH=1200                                                                                                                         |
| AT5G09840 | UGAGAAUUGCAUUCACAGACU    | 158   | 4   | Cleavage    | Symbols:   Putative endonuclease or glycosyl hydrolase   chr5:3058997-3061970 FORWARD LENGTH=2805                                                                                                                                             |
| AT5G09850 | UCUGAACCCUGAUUUAUUCUCC   | 275   | 3.5 | Translation | Symbols:   Transcription elongation factor (TFIIIS) family protein   chr5:3063251-3065889 REVERSE LENGTH=1967                                                                                                                                 |
| AT5G09930 | UCGAGUGACUUGGGAGCAUUG    | 244   | 3.5 | Cleavage    | Symbols:   ATGNC2, GCN2   ABC transporter family protein   chr5:3097643-3100241 REVERSE LENGTH=2037                                                                                                                                           |
| AT5G09980 | UGACGACACUUGCAUGAUUUCU   | 174   | 4.5 | Cleavage    | Symbols:   PROPEP1   elicitor peptide 4 precursor   chr5:3122731-3123964 FORWARD LENGTH=541                                                                                                                                                   |
| AT5G10120 | UCCCAACCCUAGUACUUAAGCG   | 236   | 4   | Cleavage    | Symbols:   Ethylene insensitive 3 family protein   chr5:3169732-3171147 FORWARD LENGTH=1416                                                                                                                                                   |
| AT5G10160 | UAGCUACAAGAACUCUUCUUC    | 1828  | 4   | Cleavage    | Symbols:   Thioesterase superfamily protein   chr5:3185746-3187312 FORWARD LENGTH=886                                                                                                                                                         |
| AT5G10240 | UGGCGUAGAGGAUACACGACU    | 163   | 3   | Cleavage    | Symbols:   ASN3   asparagine synthetase 3   chr5:3212688-3216466 REVERSE LENGTH=2028                                                                                                                                                          |
| AT5G10300 | UUUAGGAAUUGUUGCAUAUGCA   | 1164  | 3.5 | Cleavage    | Symbols:   ATMESS, MESS, HNL   methyl esterase 5   chr5:3239617-3240870 FORWARD LENGTH=990                                                                                                                                                    |
| AT5G10320 | CUUUGCAUUGAGGUAAGCGGCU   | 355   | 4   | Translation | Symbols:   unknown protein; Has 54 Blast hits to 53 proteins in 19 species: Archae - 0; Bacteria - 4; Metazoa - 0; Fungi - 0; Plants - 50; Viruses - 0; Other Eukaryotes - 0 (source: NCBI BLINK).   chr5:3243956-3246721 REVERSE LENGTH=1551 |
| AT5G10370 | UUAGAGAUUCCCCUGUUAUCUG   | 3917  | 4.5 | Cleavage    | Symbols:    helicase domain-containing protein / IBR domain-containing protein / zinc finger protein-related   chr5:3261245-3267344 FORWARD LENGTH=5484                                                                                       |
| AT5G10420 | UUUAGGAUUGUUGCAUAUGCA    | 1164  | 4   | Cleavage    | Symbols:   MATE efflux family protein   chr5:3273553-3276490 REVERSE LENGTH=1495                                                                                                                                                              |
| AT5G10490 | UAUAGGGUGUUGAAAGAAUUGC   | 535   | 3   | Cleavage    | Symbols:   MSL2   MSC5-like 2   chr5:3300225-3304761 REVERSE LENGTH=2268                                                                                                                                                                      |
| AT5G10540 | UGACGGAAGCUACAGAGGAUG    | 108   | 2.5 | Cleavage    | Symbols:   Zincin-like metalloproteases family protein   chr5:3328065-3334971 FORWARD LENGTH=2852                                                                                                                                             |
| AT5G10660 | UUUCUUGUAAUCUUGACCGGGGA  | 158   | 2.5 | Cleavage    | Symbols:    calmodulin-binding protein-related   chr5:3370518-3372348 FORWARD LENGTH=1394                                                                                                                                                     |
| AT5G10690 | UGCCAUGAUGGAGAGCUGGCU    | 164   | 4.5 | Translation | Symbols:   pentapeptide repeat (PPR) repeat-containing protein / CBS domain-containing protein   chr5:3374393-3377451 REVERSE LENGTH=1912                                                                                                     |
| AT5G10750 | UACGCUAGGAGAUUUCUGGCC    | 122   | 4   | Cleavage    | Symbols:   Protein of unknown function (DUF1336)   chr5:3398951-3400156 FORWARD LENGTH=1206                                                                                                                                                   |
| AT5G10770 | CUUCGACUGAGGUAAGCGGCCU   | 234   | 4.5 | Cleavage    | Symbols:   Eukaryotic aspartyl protease family protein   chr5:3403110-3405448 REVERSE LENGTH=1763                                                                                                                                             |
| AT5G10810 | UGGCGCUACAACUCUGCAAGGU   | 10625 | 4   | Translation | Symbols:   ATER, ETR   enhancer of rudimentary protein, putative   chr5:3418666-3420635 REVERSE LENGTH=640                                                                                                                                    |
| AT5G10860 | UACACUCUGCAUUCUAGAAGCUG  | 146   | 4.5 | Cleavage    | Symbols:   Cystathionine beta-synthase (CBS) family protein   chr5:3428891-3430470 REVERSE LENGTH=1025                                                                                                                                        |
| AT5G10910 | UUCCCUAGAAUUCUUUCCUCCU   | 1646  | 4.5 | Cleavage    | Symbols:   marW methylase family protein   chr5:3439553-3441582 FORWARD LENGTH=1405                                                                                                                                                           |
| AT5G10945 | UGAGAAUUAUGCAUUCACAGCU   | 158   | 3.5 | Cleavage    | Symbols:   unknown protein; FUNCTIONS IN: molecular_function unknown; INVOLVED IN: biological_process unknown; LOCATED IN: endomembrane system; Has 30201 Blast hits to 17322 proteins in 780 species: Archae - 12; Bacteria - 1396; N        |
| AT5G10950 | UGAAUAAUAAACUGAACCAUCC   | 263   | 4.5 | Translation | Symbols:   Tudor/PWWV/MBT superfamily protein   chr5:3459273-3461734 REVERSE LENGTH=1574                                                                                                                                                      |
| AT5G11090 | UGAAUGACAAACUGGACAGGCU   | 583   | 4.5 | Cleavage    | Symbols:    serine-rich protein-related   chr5:3524680-3525846 FORWARD LENGTH=1167                                                                                                                                                            |
| AT5G11110 | UAUUCUUGAGGCGGUGCUGGCG   | 334   | 4.5 | Cleavage    | Symbols:   SPS1, ATSPS2F, KNS2, SPS2F   sucrose phosphate transferase 2F   chr5:3536226-3541133 FORWARD LENGTH=3576                                                                                                                           |
| AT5G11290 | UCCGCUAGAAUUAUCAAACUG    | 281   | 4   | Cleavage    | Symbols:   Plant protein of unknown function (DUF247)   chr5:3599001-3600472 FORWARD LENGTH=1472                                                                                                                                              |
| AT5G11350 | UCUAGUUCGCGUUUUCAGAC     | 163   | 4   | Cleavage    | Symbols:   DNASE I-like superfamily protein   chr5:3621561-3625645 FORWARD LENGTH=2520                                                                                                                                                        |
| AT5G11380 | UAACCGGGGCAUGAGAGACUG    | 100   | 3   | Cleavage    | Symbols:   DXP53   1-deoxy-D-xylulose 5-phosphate synthase 3   chr5:3629998-3633441 FORWARD LENGTH=2468                                                                                                                                       |
| AT5G11470 | UAUGGCGUGGGAGCAUCCGCA    | 299   | 3.5 | Cleavage    | Symbols:    bromo-adjacent homology (BAH) domain-containing protein   chr5:3662717-3667923 REVERSE LENGTH=2413                                                                                                                                |
| AT5G11540 | UGUGACACCGAUUUCUAGUUGC   | 114   | 3.5 | Cleavage    | Symbols:   D-arabinono-1,4-lactone oxidase family protein   chr5:3703002-3704981 REVERSE LENGTH=1758                                                                                                                                          |
| AT5G11690 | UUAGAGAGCUCUACACCGACU    | 261   | 3.5 | Translation | Symbols:   ATTIM17-3, TIM17-3   translocase inner membrane subunit 17-3   chr5:3761244-3762346 FORWARD LENGTH=856                                                                                                                             |
| AT5G11750 | UGGCGGCUUAUUAUUGGGGCU    | 115   | 4.5 | Translation | Symbols:   Ribosomal protein L19 family protein   chr5:3787320-3789212 FORWARD LENGTH=1089                                                                                                                                                    |
| AT5G11770 | UUUGGACUGGGAUAGGACUAGG   | 101   | 3.5 | Translation | Symbols:   NADH-ubiquinone oxidoreductase 20 kDa subunit, mitochondrial   chr5:3790806-3793000 REVERSE LENGTH=1070                                                                                                                            |
| AT5G12020 | UACAGAAUAGGCUUAAGUUAAC   | 189   | 3.5 | Cleavage    | Symbols:   HSP17.6II   17.6 kDa class II heat shock protein   chr5:3882237-3882938 REVERSE LENGTH=702                                                                                                                                         |
| AT5G12150 | UCUAGUUCACAUUUUUCGGGAC   | 427   | 4   | Cleavage    | Symbols:   Rho GTPase activation protein (RhoGAP) with PH domain   chr5:3924126-3930305 REVERSE LENGTH=2956                                                                                                                                   |
| AT5G12330 | UAUGUCUUGUUGAUUCCACCU    | 344   | 3.5 | Translation | Symbols:   LRP1   lateral root primordium (LRP) protein-related   chr5:3987375-3989754 REVERSE LENGTH=1586                                                                                                                                    |
| AT5G12370 | UGCAUCUGCUAGGUCUUGGAGC   | 378   | 4.5 | Translation | Symbols:   SEC10   exocyst complex component sec10   chr5:4002775-4008803 REVERSE LENGTH=2799                                                                                                                                                 |
| AT5G12420 | UGUGAGUUAUUGUUGAGGCUU    | 178   | 3   | Cleavage    | Symbols:   O-acetyltransferase (OAT) like family protein   chr5:4024314-4025741 REVERSE LENGTH=1723                                                                                                                                           |
| AT5G12470 | UGUGUAUGCAUACUUGGGAC     | 106   | 3.5 | Cleavage    | Symbols:   Protein of unknown function (DUF3411)   chr5:4044622-4047436 REVERSE LENGTH=1635                                                                                                                                                   |
| AT5G12840 | UAUGUCUUCUGUUGAUCCACCU   | 344   | 3.5 | Cleavage    | Symbols:   HAP2A, EMB2220, ATHAP2A, NF-YA1   nuclear factor Y, subunit A1   chr5:4050840-4053534 REVERSE LENGTH=1275                                                                                                                          |

|           |                        |      |     |             |                                                                                                                                                                                                                                                    |
|-----------|------------------------|------|-----|-------------|----------------------------------------------------------------------------------------------------------------------------------------------------------------------------------------------------------------------------------------------------|
| ATSG12850 | AUUGAUUUCUGCACUCAAGGGC | 128  | 5   | Cleavage    | [ Symbols:   CCHH-type zinc finger protein with ARM repeat domain   chr5:4056187-4059580 FORWARD LENGTH=2773                                                                                                                                       |
| ATSG13000 | UACGGACCCGGUGUGCUGGC   | 119  | 5   | Cleavage    | [ Symbols:   ATGSL12, gsl12   glucan synthase-like 12   chr5:4110295-4121427 REVERSE LENGTH=6160                                                                                                                                                   |
| ATSG13050 | UCAAGCGAUUGAGGAAGUUGU  | 102  | 4.5 | Cleavage    | [ Symbols:   5-FCL   5-formyltetrahydrofolate cycloligase   chr5:4136556-4138721 REVERSE LENGTH=1196                                                                                                                                               |
| ATSG13060 | CCUGAGCCUAGUGACCGAGUA  | 270  | 3.5 | Translation | [ Symbols:   ABAP1   ARMADILLO BTB protein 1   chr5:4142958-4147091 FORWARD LENGTH=2353                                                                                                                                                            |
| ATSG13180 | UUCGAGGAGAUUAGCGGCC    | 4887 | 5   | Cleavage    | [ Symbols:   ANAC083, VNIZ, NAC083   NAC domain containing protein 83   chr5:4196572-4197848 FORWARD LENGTH=1101                                                                                                                                   |
| ATSG13200 | UUUGAUCCGAGGAUGAUGGA   | 816  | 3   | Translation | [ Symbols:   GRAM domain family protein   chr5:4207004-4208289 FORWARD LENGTH=1106                                                                                                                                                                 |
| ATSG13240 | UUGAAAGACAUUUGUGAUCACC | 926  | 4   | Cleavage    | [ Symbols:   transcription regulators   chr5:4225005-4227613 REVERSE LENGTH=1058                                                                                                                                                                   |
| ATSG13400 | UGAAAGGAGAGCUCAGCUGCU  | 1483 | 2.5 | Translation | [ Symbols:   Major facilitator superfamily protein   chr5:4296688-4299223 REVERSE LENGTH=2185                                                                                                                                                      |
| ATSG13410 | UUUGUGUAUUAUUUUGAGCCU  | 108  | 4   | Cleavage    | [ Symbols:   FKBP-like peptidyl prolyl cis-trans isomerase family protein   chr5:429705-4301780 REVERSE LENGTH=970                                                                                                                                 |
| ATSG13520 | UCCACCGACUGAGCAACAUG   | 1524 | 4.5 | Cleavage    | [ Symbols:   peptidase M1 family protein   chr5:4341948-4344671 REVERSE LENGTH=2120                                                                                                                                                                |
| ATSG13560 | UCGACAAGAGCUGGAACGUCU  | 423  | 3.5 | Translation | [ Symbols:   unknown protein; BEST Arabidopsis thaliana protein match is: unknown protein (TAIR:AT2G37370.1); Has 12055 Blast hits to 8846 proteins in 811 species: Archae - 217; Bacteria - 1046; Metazoa - 6104; Fungi - 1115; Plants - 528; Vir |
| ATSG13590 | UCACUGUAUUUCUGGAGAGU   | 123  | 3.5 | Cleavage    | [ Symbols:   unknown protein; Has 150 Blast hits to 121 proteins in 42 species: Archae - 0; Bacteria - 80; Fungi - 5; Plants - 17; Viruses - 0; Other Eukaryotes - 40 (source: NCBI BLink).   chr5:4372329-4379356 REVERSE LENGTH=5101             |
| ATSG13630 | UACACUCACUUGAUCUAGGAG  | 223  | 4   | Translation | [ Symbols:   GUN5, CCH, CHLH, CCH1, ABAR   magnesium-chelatae subunit chlH, chloroplast, putative / Mg-protoporphyrin IX chelatase, putative (CHLH)   chr5:4387334-4392227 REVERSE LENGTH=4523                                                     |
| ATSG13640 | CGUCACUGCGAAUUCUGGAG   | 272  | 5   | Cleavage    | [ Symbols:   ATPDAT, PDAT, PDAT1   phospholipid:diacylglycerol acyltransferase   chr5:4393062-4397541 FORWARD LENGTH=2811                                                                                                                          |
| ATSG13880 | UAUAAGGAGAGAUCCGACUAC  | 298  | 3.5 | Cleavage    | [ Symbols:   unknown protein; BEST Arabidopsis thaliana protein match is: unknown protein (TAIR:AT5G47920.1); Has 30201 Blast hits to 17322 proteins in 780 species: Archae - 12; Bacteria - 1396; Metazoa - 17338; Fungi - 3422; Plants - 5037; v |
| ATSG13920 | UCAUCAUGAACUACUUGUGCU  | 103  | 5   | Cleavage    | [ Symbols:   GRF zinc finger / Zinc knuckle protein   chr5:4485931-4487433 REVERSE LENGTH=1248                                                                                                                                                     |
| ATSG13980 | UAACGGGGCAUGAGAGACUC   | 100  | 5   | Cleavage    | [ Symbols:   Glycosyl hydrolase family 38 protein   chr5:4508496-4514425 FORWARD LENGTH=3296                                                                                                                                                       |
| ATSG14050 | UGAAUAAAACUGAACCAAGCC  | 263  | 3   | Translation | [ Symbols:   Transducin/WD40 repeat-like superfamily protein   chr5:4533261-4535301 FORWARD LENGTH=1899                                                                                                                                            |
| ATSG14060 | UCUUGCAGUAGGUAAGCGCCU  | 355  | 3.5 | Translation | [ Symbols:   CARAB-AK-LYS   Aspartate kinase family protein   chr5:4535401-4539193 FORWARD LENGTH=2229                                                                                                                                             |
| ATSG14150 | UGAGACACAACGAGGAGAUUC  | 244  | 4.5 | Cleavage    | [ Symbols:   Protein of unknown function, DUF642   chr5:4565172-4566988 REVERSE LENGTH=1416                                                                                                                                                        |
| ATSG14310 | UACCGGAGGAGCUGAACACGC  | 302  | 4.5 | Cleavage    | [ Symbols:   AXC16, CXE16   carboxyesterase 16   chr5:4615318-4617615 FORWARD LENGTH=1808                                                                                                                                                          |
| ATSG14350 | UCCCAACCCAUCAUUAAGCG   | 236  | 3   | Translation | [ Symbols:   Pentatricopeptide repeat (PPR) superfamily protein   chr5:4627140-4628703 REVERSE LENGTH=726                                                                                                                                          |
| ATSG14450 | UCUGACGAGUAGACAAUUCU   | 111  | 4.5 | Cleavage    | [ Symbols:   GDSL-like lipase/Acylhydrolase superfamily protein   chr5:465841-4660175 FORWARD LENGTH=1358                                                                                                                                          |
| ATSG14490 | UCACUCGCGACUUAUGAACUC  | 146  | 3   | Translation | [ Symbols:   anac085, NAC085   NAC domain containing protein 85   chr5:4670779-4672072 REVERSE LENGTH=1053                                                                                                                                         |
| ATSG14500 | UACCCGUAUCUGCUUUAUAA   | 185  | 5   | Translation | [ Symbols:   aldose 1-epimerase family protein   chr5:4674233-4676765 REVERSE LENGTH=1329                                                                                                                                                          |
| ATSG14750 | UUUAGAUUCCCUUUAUCUG    | 387  | 4   | Translation | [ Symbols:   WER, ATMYB66, WER1, MYB66   myb domain protein 66   chr5:4763452-4764738 REVERSE LENGTH=816                                                                                                                                           |
| ATSG14760 | AAACAGACAAGUUAUCUCGCC  | 986  | 4   | Cleavage    | [ Symbols:   AO   L-aspartate oxidase   chr5:4768468-4772153 FORWARD LENGTH=2389                                                                                                                                                                   |
| ATSG14770 | UGAGCCGACAAAGAGUAUUC   | 111  | 3   | Cleavage    | [ Symbols:   Tetratricopeptide repeat (TPR)-like superfamily protein   chr5:4772881-4775697 REVERSE LENGTH=2817                                                                                                                                    |
| ATSG14900 | UCAAGCGAUUGAGGAUUGU    | 102  | 3   | Cleavage    | [ Symbols:   helicase associated (HA2) domain-containing protein   chr5:4822676-4823581 REVERSE LENGTH=906                                                                                                                                         |
| ATSG15280 | CAUUGACUUAAGCCUGCGCU   | 190  | 5   | Cleavage    | [ Symbols:   Pentatricopeptide repeat (PPR) superfamily protein   chr5:4962293-4966141 FORWARD LENGTH=3849                                                                                                                                         |
| ATSG15400 | AAACACUCUAGACUUGAUCCU  | 123  | 3.5 | Translation | [ Symbols:   U-box domain-containing protein   chr5:4997611-5003140 REVERSE LENGTH=3503                                                                                                                                                            |
| ATSG15700 | CUCAGGCUCAUACUGACGUC   | 968  | 3   | Translation | [ Symbols:   DNA/RNA polymerases superfamily protein   chr5:5115300-5121840 REVERSE LENGTH=3659                                                                                                                                                    |
| ATSG15720 | UGUGAGUGUUUGUGAGGUCU   | 178  | 4   | Cleavage    | [ Symbols:   GLIP7   GDSL-motif lipase 7   chr5:5124525-5126181 REVERSE LENGTH=1280                                                                                                                                                                |
| ATSG15740 | UGUCACGUAUUAUUCUCCU    | 123  | 4   | Cleavage    | [ Symbols:   O-fucosyltransferase family protein   chr5:5134527-5137626 REVERSE LENGTH=2458                                                                                                                                                        |
| ATSG15790 | UUCACAUUGCCGGCUGAGCA   | 461  | 4.5 | Cleavage    | [ Symbols:   RING/U-box superfamily protein   chr5:5148744-5151433 FORWARD LENGTH=1534                                                                                                                                                             |
| ATSG15802 | UUUGGGCGUACAUCUGCAAG   | 3787 | 3.5 | Translation | [ Symbols:   unknown protein; FUNCTIONS IN: molecular_function unknown; INVOLVED IN: biological_process unknown; LOCATED IN: endomembrane system; Has 35 Blast hits to 35 proteins in 15 species: Archae - 0; Bacteria - 4; Metazoa - 0; Fu        |
| ATSG15820 | AUGGAAUUUAUACUUGCGGCU  | 196  | 3.5 | Cleavage    | [ Symbols:   RING/U-box superfamily protein   chr5:5161724-5163030 FORWARD LENGTH=1307                                                                                                                                                             |
| ATSG15845 | UCUGUAUGCAUUAUUGGGAC   | 1212 | 3.5 | Cleavage    | [ Symbols:   other RNA   chr5:5173185-5177889 FORWARD LENGTH=2248                                                                                                                                                                                  |
| ATSG15890 | UCUGUACCGCUGAUUUCUCC   | 275  | 4   | Translation | [ Symbols:   TBL21   TRICHHOME BIREFRINGENCE-LIKE 21   chr5:5187587-5189348 REVERSE LENGTH=1681                                                                                                                                                    |
| ATSG15920 | UCUUGCAGUAGGUAAGCGCCU  | 355  | 3.5 | Translation | [ Symbols:   SMC5   structural maintenance of chromosomes 5   chr5:5195863-5199559 FORWARD LENGTH=3279                                                                                                                                             |
| ATSG16220 | UCUUGCAGUAGGUAAGCGCCU  | 355  | 4   | Translation | [ Symbols:   Octicosapeptide/phox/Bem1p family protein   chr5:5298303-5300610 REVERSE LENGTH=1763                                                                                                                                                  |
| ATSG16290 | UUUAGAUUCCCUUUAUCUG    | 387  | 3.5 | Cleavage    | [ Symbols:   VAT1   VALINE-TOLERANT 1   chr5:5333764-5337744 FORWARD LENGTH=1804                                                                                                                                                                   |
| ATSG16350 | UGUGAGUGUUUGUGAGGUCU   | 178  | 3.5 | Cleavage    | [ Symbols:   O-acyltransferase (WSD1-like) family protein   chr5:5352626-5355070 FORWARD LENGTH=1658                                                                                                                                               |
| ATSG16520 | UUGGACGUCUUAUGUAAGAGA  | 437  | 4   | Translation | [ Symbols:   unknown protein; Has 25 Blast hits to 25 proteins in 9 species: Archae - 0; Bacteria - 0; Metazoa - 0; Fungi - 0; Plants - 25; Viruses - 0; Other Eukaryotes - 0 (source: NCBI BLink).   chr5:5394608-5397455 REVERSE LENGTH=2043     |
| ATSG16540 | UUUGAUCCGAGGAUGAUGGA   | 816  | 3   | Translation | [ Symbols:   ZFN3   zinc finger nuclease 3   chr5:5403203-5405147 FORWARD LENGTH=1454                                                                                                                                                              |
| ATSG16560 | UUUAACAACUAGUAUUCUGU   | 1055 | 4   | Cleavage    | [ Symbols:   KAN, KAN1   Homeodomain-like superfamily protein   chr5:5406863-5411424 REVERSE LENGTH=2046                                                                                                                                           |
| ATSG16660 | UGGCAGUAGGAGUACACGAC   | 163  | 3   | Translation | [ Symbols:   unknown protein; FUNCTIONS IN: molecular_function unknown; INVOLVED IN: biological_process unknown; LOCATED IN: chloroplast, membrane; EXPRESSED IN: 23 plant structures; EXPRESSED DURING: 14 growth stages; BEST Arab               |
| ATSG16680 | CUUCCUCCUAGUAUUCUCCU   | 192  | 4   | Translation | [ Symbols:   RING/FYVE/PHD zinc finger superfamily protein   chr5:5467373-5473506 REVERSE LENGTH=4395                                                                                                                                              |
| ATSG16890 | UUAAGCAGGAGGAUGAUGGAC  | 291  | 5   | Cleavage    | [ Symbols:   Exostosin family protein   chr5:5551629-5554917 FORWARD LENGTH=1747                                                                                                                                                                   |
| ATSG16900 | UAGAUGUUCUAUGUAUUGCA   | 232  | 3.5 | Cleavage    | [ Symbols:   Leucine-rich repeat protein kinase family protein   chr5:5552554-5559715 FORWARD LENGTH=2601                                                                                                                                          |
| ATSG16910 | UUGGUCACACUAGGACUGUG   | 104  | 4   | Cleavage    | [ Symbols:   ACTS12D, CSLD2   cellulose-synthase like D2   chr5:5561679-5565580 FORWARD LENGTH=3728                                                                                                                                                |
| ATSG17160 | UGAGAAACUAGUUCGAGACU   | 158  | 3   | Cleavage    | [ Symbols:   unknown protein; BEST Arabidopsis thaliana protein match is: unknown protein (TAIR:AT3G03130.1); Has 14330 Blast hits to 10381 proteins in 896 species: Archae - 94; Bacteria - 2881; Metazoa - 4019; Fungi - 1576; Plants - 515; Vir |
| ATSG17270 | UCUCAUGUAGUUCUAGUUCGCA | 1437 | 4   | Cleavage    | [ Symbols:   Protein prenyltransferase superfamily protein   chr5:5679991-5685597 FORWARD LENGTH=2704                                                                                                                                              |
| ATSG17300 | CUUGGCAUCGAUUAUGACUC   | 1055 | 3.5 | Cleavage    | [ Symbols:   RVE1   Homeodomain-like superfamily protein   chr5:5690227-5692902 REVERSE LENGTH=1839                                                                                                                                                |
| ATSG17780 | UCGAGUAGCUUUGGAGUAGCCU | 244  | 5   | Cleavage    | [ Symbols:   alpha/beta-Hydrolases superfamily protein   chr5:5867283-5869050 REVERSE LENGTH=1474                                                                                                                                                  |
| ATSG17840 | UGAGAAAUUAGCUACAGACU   | 158  | 4   | Cleavage    | [ Symbols:   DnaJ/Hsp40 cysteine-rich domain superfamily protein   chr5:5895674-5897150 REVERSE LENGTH=765                                                                                                                                         |
| ATSG17850 | UAGGCUUGAGAUUGGACCCU   | 875  | 4   | Cleavage    | [ Symbols:   Sodium/calcium exchanger family protein   chr5:5899253-5900932 FORWARD LENGTH=1680                                                                                                                                                    |
| ATSG17930 | UAUUUAUUUUUGGCCUGAGGU  | 116  | 3.5 | Cleavage    | [ Symbols:   MIF4G domain-containing protein / MA3 domain-containing protein   chr5:5939998-5944430 REVERSE LENGTH=2634                                                                                                                            |
| ATSG17970 | UCUAUAGCCAAGUAUCUACU   | 106  | 3.5 | Cleavage    | [ Symbols:   Disease resistance protein (TIR-NBS-LRR class) family   chr5:5948999-5951619 REVERSE LENGTH=2343                                                                                                                                      |
| ATSG17980 | UAUUGACUGCAGAGUAUGACC  | 237  | 4.5 | Cleavage    | [ Symbols:   C2 calcium/lipid-binding plant phosphoribosyltransferase family protein   chr5:5953596-5956745 FORWARD LENGTH=3150                                                                                                                    |
| ATSG18190 | UGAAGGAUUUGUGUUAACCA   | 474  | 3   | Cleavage    | [ Symbols:   Protein kinase family protein   chr5:6009967-6014689 REVERSE LENGTH=2674                                                                                                                                                              |
| ATSG18210 | UGGCGCUAACUCUGCGAGGU   | 1187 | 4   | Translation | [ Symbols:   NAD(P)-binding Rossmann-fold superfamily protein   chr5:6017865-6019993 FORWARD LENGTH=1908                                                                                                                                           |
| ATSG18350 | UCAACACUCUGAUACUACUAG  | 143  | 3.5 | Cleavage    | [ Symbols:   Disease resistance protein (TIR-NBS-LRR class) family   chr5:6074069-6078569 REVERSE LENGTH=3738                                                                                                                                      |
| ATSG18360 | UGGAGAUUAUAGUAUAGCGCC  | 126  | 3   | Cleavage    | [ Symbols:   Disease resistance protein (TIR-NBS-LRR class) family   chr5:6080049-6083027 REVERSE LENGTH=2703                                                                                                                                      |
| ATSG18370 | UUUAGGAUUGUAUGAUUAGCA  | 1164 | 3   | Cleavage    | [ Symbols:   Disease resistance protein (TIR-NBS-LRR class) family   chr5:6085036-6088926 REVERSE LENGTH=3633                                                                                                                                      |
| ATSG18390 | UUUAUACGAACUUCUGGCCU   | 310  | 3.5 | Cleavage    | [ Symbols:   Pentatricopeptide repeat (PPR) superfamily protein   chr5:6099054-6092545 FORWARD LENGTH=1592                                                                                                                                         |
| ATSG18490 | UUCGAGCUUUGUAUGCCAAC   | 156  | 5   | Cleavage    | [ Symbols:   Plant protein of unknown function (DUF946)   chr5:6134152-6136765 REVERSE LENGTH=1996                                                                                                                                                 |
| ATSG18570 | UCCACAUUGGCAGCUCUGUACC | 187  | 4   | Cleavage    | [ Symbols:   EMB269, ATGPCS, CPASR1   GTP1/OBG family protein   chr5:6171661-6174833 REVERSE LENGTH=2234                                                                                                                                           |
| ATSG18610 | UUGAGAGAACUCCUGACGACU  | 1272 | 4   | Translation | [ Symbols:   Protein kinase superfamily protein   chr5:6192443-6195753 FORWARD LENGTH=2005                                                                                                                                                         |
| ATSG18650 | AAAGCAAGAUUACUGCGCC    | 986  | 3.5 | Cleavage    | [ Symbols:   CHY-type/ITCH-type/RING-type Zinc finger protein   chr5:6217912-6220702 FORWARD LENGTH=1480                                                                                                                                           |
| ATSG18790 | UAAGCAGUAGUACCGUUGCCU  | 152  | 4   | Cleavage    | [ Symbols:   F-box/RN1-like superfamily protein   chr5:6264284-6266097 FORWARD LENGTH=1652                                                                                                                                                         |
| ATSG18820 | UGUCACCGUAUUAUUCUCCU   | 123  | 3.5 | Cleavage    | [ Symbols:   EMB3007   TCP-1/cpn60 chaperonin family protein   chr5:6271489-6274327 FORWARD LENGTH=1962                                                                                                                                            |
| ATSG18900 | CUCGGGAGAAAGAGAGAGCCU  | 259  | 3.5 | Cleavage    | [ Symbols:   2-oxoglutarate (2OG) and Fe(II)-dependent oxygenase superfamily protein   chr5:6304215-6306290 REVERSE LENGTH=1215                                                                                                                    |
| ATSG19090 | UUUUGUUUCUGAUUCCCGCCU  | 669  | 4   | Cleavage    | [ Symbols:   Heavy metal transport/detoxification superfamily protein   chr5:6387489-6390024 FORWARD LENGTH=2163                                                                                                                                   |
| ATSG19130 | UGGCGCUCAACUCUGCGAGGU  | 1187 | 4.5 | Cleavage    | [ Symbols:   GPI transamidase component family protein / Gaa1-like family protein   chr5:6415920-6419021 REVERSE LENGTH=2327                                                                                                                       |
| ATSG19180 | UACUCCGAAAAUCACAAACG   | 113  | 4   | Cleavage    | [ Symbols:   ECR1   E1 C-terminal related 1   chr5:6453276-6456014 FORWARD LENGTH=1728                                                                                                                                                             |
| ATSG19260 | UUUAGAGAUUCCCUUUAUCUG  | 387  | 5   | Cleavage    | [ Symbols:   Protein of unknown function (DUF3049)   chr5:6479400-6480446 REVERSE LENGTH=1047                                                                                                                                                      |
| ATSG19310 | CUCAUUGAUUGUUAUGUUCGCA | 102  | 5   | Cleavage    | [ Symbols:   Homeotic gene regulator   chr5:6498779-6503432 FORWARD LENGTH=3322                                                                                                                                                                    |
| ATSG19360 | UACCGGAGGACGUAACACACC  | 302  | 4.5 | Translation | [ Symbols:   CPK34   calcium-dependent protein kinase 34   chr5:6521716-6523780 REVERSE LENGTH=1572                                                                                                                                                |
| ATSG19390 | UCAUCUGCAGUAAGCCUGGCA  | 104  | 4   | Cleavage    | [ Symbols:   Rho GTPase activation protein (RhoGAP) with PH domain   chr5:6531540-6537322 FORWARD LENGTH=2690                                                                                                                                      |
| ATSG19400 | UCUGUAUGUAUACUUGGGAC   | 1212 | 4   | Cleavage    | [ Symbols:   SMG7   Telomerase activating protein Est1   chr5:6540003-6544975 FORWARD LENGTH=3860                                                                                                                                                  |
| ATSG19450 | UAUCGAGCACUACGCUACUGC  | 123  | 4   | Translation | [ Symbols:   CDPK19, CPK8   calcium-dependent protein kinase 19   chr5:6558426-6561534 REVERSE LENGTH=1911                                                                                                                                         |
| ATSG19530 | UGAAUAAAACUGAACCAAGCC  | 263  | 4   | Cleavage    | [ Symbols:   ACLS   S-adenosyl-L-methionine-dependent methyltransferases superfamily protein   chr5:6588958-6591363 REVERSE LENGTH=1392                                                                                                            |
| ATSG19590 | UUGAGGAUCCCUUUAUCUG    | 3917 | 5   | Cleavage    | [ Symbols:   Protein of unknown function, DUF538   chr5:6610730-6612103 REVERSE LENGTH=735                                                                                                                                                         |
| ATSG19620 | UGGCGAUAGGAGUACACGACU  | 163  | 4   | Cleavage    | [ Symbols:   EMB213, OEP80, ATOEP80, TOC75   outer envelope protein of 80 kDa   chr5:6623204-6627846 FORWARD LENGTH=2523                                                                                                                           |
| ATSG19660 | UAGAUAACAGACUUAUUCU    | 107  | 4   | Cleavage    | [ Symbols:   ATSBT6_1, SIP, AT5IP   SITE-1 protease   chr5:6642004-6646530 REVERSE LENGTH=2343                                                                                                                                                     |
| ATSG19680 | UAGAGAGAGUAGUACCGCCU   | 105  | 4.5 | Cleavage    | [ Symbols:   Leucine-rich repeat (LRR) family protein   chr5:6649505-6651935 FORWARD LENGTH=1416                                                                                                                                                   |
| ATSG19750 | UUUGGCUAGAGUUGGACGCC   | 367  | 4.5 | Cleavage    | [ Symbols:   Peroxisomal membrane 22 kDa (Mpv17/PMP22) family protein   chr5:6677069-6679384 FORWARD LENGTH=1179                                                                                                                                   |
| ATSG19960 | UGUGAGUGUUUGUGAGGUCUU  | 178  | 3.5 | Cleavage    | [ Symbols:   RNA-binding (RRM/RBD/RNP motifs) family protein   chr5:6743926-6746339 FORWARD LENGTH=1323                                                                                                                                            |

|           |                        |       |     |             |                                                                                                                                                                                                                                                       |
|-----------|------------------------|-------|-----|-------------|-------------------------------------------------------------------------------------------------------------------------------------------------------------------------------------------------------------------------------------------------------|
| ATSG20040 | UUGACGACCAACUCCGUCU    | 170   | 4   | Cleavage    | [ Symbols: IPT9   isopentenyltransferase 9   chr5:6767802-6771190 REVERSE LENGTH=1757                                                                                                                                                                 |
| ATSG20260 | UGGGGCGUUAUUAUUUGG     | 115   | 5   | Cleavage    | [ Symbols:   Exostoin family protein   chr5:6836806-6839532 REVERSE LENGTH=1377                                                                                                                                                                       |
| ATSG20300 | UUCCGUUGGUGUGGCGCCAC   | 196   | 4.5 | Cleavage    | [ Symbols:   Avirulence induced gene (AIG1) family protein   chr5:6853416-6856977 REVERSE LENGTH=2654                                                                                                                                                 |
| ATSG20330 | UGAAGGACAAGUACGUCGU    | 415   | 3.5 | Cleavage    | [ Symbols: BETAG4   beta-1,3-glucanase 4   chr5:6871561-6873112 FORWARD LENGTH=1552                                                                                                                                                                   |
| ATSG20350 | UUGGUCUGGCCAUUCGCGC    | 147   | 5   | Cleavage    | [ Symbols: T1P1   Ankyrin repeat family protein with DHHC zinc finger domain   chr5:6876589-6881270 FORWARD LENGTH=2214                                                                                                                               |
| ATSG20450 | UUUAAAAACGAGGACUUUUGC  | 115   | 3.5 | Cleavage    | [ Symbols:   CONTAINS InterPro DOMAIN/s: Dilute (InterPro:IPR002710); BEST Arabidopsis thaliana protein match is: Myosin family protein with Dil domain (TAIR:ATSG20490.2); Has 1630 Blast hits to 1368 proteins in 340 species: Archae - 22; Ba      |
| ATSG20490 | UGACGUCGAGUUAUGGACGUA  | 416   | 3.5 | Translation | [ Symbols: XIJ, ATXIK, XI-17   Myosin family protein with Dil domain   chr5:6926623-6937506 REVERSE LENGTH=5153                                                                                                                                       |
| ATSG20600 | UUUUGUUGUACUUAUGAAGAU  | 179   | 3   | Cleavage    | [ Symbols:   FUNCTIONS IN: molecular_function unknown; INVOLVED IN: rRNA processing; LOCATED IN: preribosome, small subunit precursor; EXPRESSED IN: 22 plant structures; EXPRESSED DURING: 13 growth stages; CONTAINS InterPro DOMA                  |
| ATSG20640 | UCUGUGUUGUAGUAGACAUGU  | 111   | 3   | Cleavage    | [ Symbols:   Protein of unknown function (DUF567)   chr5:6984240-6985365 FORWARD LENGTH=947                                                                                                                                                           |
| ATSG20730 | UCUUAUCGAGUUGAAGAACGC  | 272   | 3   | Cleavage    | [ Symbols: NPH4, MSG3, IAA21, ARF7, TIR5, BIP   Transcriptional factor B3 family protein / auxin-responsive factor AUX/IAA-related   chr5:7016445-7022042 REVERSE LENGTH=4292                                                                         |
| ATSG20870 | CGGAGGAACUUAUGACGCGCC  | 103   | 3   | Cleavage    | [ Symbols: I-0-Glycosyl hydrolases family 17 protein   chr5:7079975-7081769 REVERSE LENGTH=1598                                                                                                                                                       |
| ATSG20920 | UUGGACACUACUUCUGCAAGG  | 611   | 4   | Cleavage    | [ Symbols: EIF2 BETA   eukaryotic translation initiation factor 2 beta subunit   chr5:7094718-7097111 REVERSE LENGTH=1188                                                                                                                             |
| ATSG21030 | UCAAACUCUUGAUACAUUAG   | 143   | 4   | Cleavage    | [ Symbols:   PAZ domain-containing protein / piwi domain-containing protein   chr5:7139892-7144272 REVERSE LENGTH=2553                                                                                                                                |
| ATSG21120 | UCGGGAUCCUGUAGUAUGUCC  | 135   | 2.5 | Cleavage    | [ Symbols: EIL2   ETHYLENE-INSENSITIVE3-like 2   chr5:7182621-7184342 FORWARD LENGTH=1722                                                                                                                                                             |
| ATSG22110 | CAACUAAACACGAGGGCAUUC  | 198   | 4.5 | Translation | [ Symbols: ATPD82, CYL2, DPB2   DNA polymerase epsilon subunit B2   chr5:7330825-7334205 REVERSE LENGTH=1854                                                                                                                                          |
| ATSG22250 | UGAGCCGACAAGAGUAGAUAG  | 111   | 3.5 | Cleavage    | [ Symbols:   Polynucleotidyl transferase, ribonuclease H-like superfamily protein   chr5:7365532-7366778 REVERSE LENGTH=1247                                                                                                                          |
| ATSG22490 | UCCAUGUCGAAAGACGCGAAC  | 136   | 4   | Cleavage    | [ Symbols:   O-acyltransferase (WSD1-like) family protein   chr5:7458943-7461049 REVERSE LENGTH=1449                                                                                                                                                  |
| ATSG22500 | CUUGGCAUCGAAUUGAAGACU  | 1059  | 3.5 | Cleavage    | [ Symbols: FAR1   fatty acid reductase 1   chr5:7470443-7474120 FORWARD LENGTH=1778                                                                                                                                                                   |
| ATSG22590 | UGAGAAACUUGCAUCUACAGUC | 118   | 4.5 | Translation | [ Symbols:   Leucine Rich Repeat protein family   chr5:7504536-7505838 FORWARD LENGTH=915                                                                                                                                                             |
| ATSG22600 | UGAGUAGAAUUGCAUUAUUC   | 154   | 5   | Cleavage    | [ Symbols:   FBD / Leucine Rich Repeat domains containing protein   chr5:7510023-7511788 FORWARD LENGTH=1573                                                                                                                                          |
| ATSG22660 | UUGACCGGAGGAGUAGGACU   | 330   | 4.5 | Translation | [ Symbols:   FBD, F-box, Skp2-like and Leucine Rich Repeat domains containing protein   chr5:7536290-7537990 REVERSE LENGTH=1528                                                                                                                      |
| ATSG22670 | UGAGAGUAUAGAUUAUJGCGC  | 126   | 3   | Cleavage    | [ Symbols:   F-box/RN1-like/FBD-like domains-containing protein   chr5:7538192-7539685 REVERSE LENGTH=1332                                                                                                                                            |
| ATSG22700 | UAAGACGUGAUJGCGUGUGUCU | 132   | 3   | Cleavage    | [ Symbols:   F-box/RN1-like/FBD-like domains-containing protein   chr5:7545516-7547595 REVERSE LENGTH=1583                                                                                                                                            |
| ATSG22820 | UCUGUAGUCUUGUGUUAUCC   | 4     | 4   | Cleavage    | [ Symbols:   ARM repeat superfamily protein   chr5:7623440-7626975 REVERSE LENGTH=1302                                                                                                                                                                |
| ATSG22830 | UUGAGGAUUUUGUGUUAACCA  | 106   | 2.5 | Translation | [ Symbols: ATMG10, GMM10, MGT10, MRS2-11   magnesium (Mg) transporter 10   chr5:7627597-7630993 FORWARD LENGTH=1736                                                                                                                                   |
| ATSG22850 | UUUGUGAUUGUUGUAGGUGU   | 141   | 4   | Cleavage    | [ Symbols:   Eukaryotic aspartyl protease family protein   chr5:7633437-7636567 REVERSE LENGTH=2031                                                                                                                                                   |
| ATSG22970 | UUUGUGGAUCCGUGUAGUCUGA | 152   | 3.5 | Cleavage    | [ Symbols:   unknown protein; BEST Arabidopsis thaliana protein match is: unknown protein (TAIR:ATSG60000.1); Has 1807 Blast hits to 1807 proteins in 277 species: Archae - 0; Bacteria - 0; Metazoa - 736; Fungi - 347; Plants - 385; Viruses - 0; O |
| ATSG23090 | CAUCAAGAACCGGUCUAGCCU  | 125   | 3.5 | Cleavage    | [ Symbols: NF-YB13   nuclear factor Y, subunit B13   chr5:7749151-7750388 FORWARD LENGTH=755                                                                                                                                                          |
| ATSG23110 | UCGAGUAUGAGCCUGAGUAUG  | 250   | 4   | Cleavage    | [ Symbols:   Zinc finger, C3HC4 type (RING finger) family protein   chr5:7758307-7775671 FORWARD LENGTH=14283                                                                                                                                         |
| ATSG23150 | UCAUGUAGUUCUAGUUGCCGU  | 245   | 3.5 | Cleavage    | [ Symbols: HUA2   Tudor/PWWP/MBT domain-containing protein   chr5:7785835-7792489 FORWARD LENGTH=4926                                                                                                                                                 |
| ATSG23190 | UUGGACGUCUAGUAGUAGAGA  | 437   | 4.5 | Cleavage    | [ Symbols: CYP86B1   cytochrome P450, family 86, subfamily B, polypeptide 1   chr5:7803141-7805815 REVERSE LENGTH=2173                                                                                                                                |
| ATSG23240 | AUUGAUUCUGCAUCAAGGGC   | 128   | 3   | Translation | [ Symbols:   DNAJ heat shock N-terminal domain-containing protein   chr5:7826732-7828724 REVERSE LENGTH=1713                                                                                                                                          |
| ATSG23270 | UUUGUUAACUAGUGGACACC   | 165   | 3   | Cleavage    | [ Symbols: STP11, ATSTP11   sugar transporter 11   chr5:7838906-7841026 FORWARD LENGTH=1923                                                                                                                                                           |
| ATSG23390 | UCCACCGACUGAAGCAAGUCC  | 1524  | 4.5 | Cleavage    | [ Symbols:   Plant protein of unknown function (DUF639)   chr5:7870513-7874505 REVERSE LENGTH=2621                                                                                                                                                    |
| ATSG23400 | AUUGACGUCGAGUAGGAGCCU  | 2734  | 3.5 | Cleavage    | [ Symbols:   Leucine-rich repeat (LRR) family protein   chr5:7880335-7882634 FORWARD LENGTH=2300                                                                                                                                                      |
| ATSG23520 | UGACCCACUUGCUAUGAUCU   | 174   | 4   | Cleavage    | [ Symbols:   smnr (Small MutS Related) domain-containing protein   chr5:7929351-7931793 REVERSE LENGTH=1799                                                                                                                                           |
| ATSG23570 | CAAAUCGGACAGUACUUGCU   | 324   | 4   | Cleavage    | [ Symbols: SG53, ATSG53   XS domain-containing protein / XS zinc finger domain-containing protein-related   chr5:7934124-7946050 FORWARD LENGTH=2145                                                                                                  |
| ATSG23680 | UCUUGAGUACUUCUUCUCCAG  | 209   | 4   | Cleavage    | [ Symbols:   Sterile alpha motif [SAM] domain-containing protein   chr5:7985354-7986851 REVERSE LENGTH=1498                                                                                                                                           |
| ATSG23770 | UAGCGUACUUCUUGGACGCCU  | 875   | 4   | Cleavage    | [ Symbols: DUF8   DOMAIN OF UNKNOWN FUNCTION 724 8   chr5:8014381-8016813 REVERSE LENGTH=2027                                                                                                                                                         |
| ATSG23780 | UAAGCAUUUUGAUUACCGGA   | 285   | 3.5 | Cleavage    | [ Symbols: DUF9, ATDUF9   DOMAIN OF UNKNOWN FUNCTION 724 9   chr5:8017192-8019026 REVERSE LENGTH=1380                                                                                                                                                 |
| ATSG23790 | CUUGUGAGUUGUUGUGAGGUC  | 103   | 3   | Cleavage    | [ Symbols: AtGOL5, GOL5   galactinol synthase 5   chr5:8020104-8021597 REVERSE LENGTH=1081                                                                                                                                                            |
| ATSG23800 | UGACGCCAAUUCUGAAGAUJU  | 154   | 5   | Cleavage    | [ Symbols: ATDUF10, DUF 10   DOMAIN OF UNKNOWN FUNCTION 724 10   chr5:8022216-8024689 REVERSE LENGTH=1659                                                                                                                                             |
| ATSG23910 | UACUGGAGGACGUCAGCACU   | 93    | 5   | Cleavage    | [ Symbols:   ATP binding microtubule motor family protein   chr5:8068452-8072991 FORWARD LENGTH=2374                                                                                                                                                  |
| ATSG23950 | UUUGGCGUGAGGUGUAGACCC  | 149   | 4   | Cleavage    | [ Symbols:   Calcium-dependent lipid-binding (CaL domain) family protein   chr5:8082744-8083604 FORWARD LENGTH=861                                                                                                                                    |
| ATSG24120 | UGACGGACAAGUAAGUUGCU   | 1505  | 4   | Cleavage    | [ Symbols: SIGE, SIG5, ATSIG5   sigma factor E   chr5:8157551-8160229 REVERSE LENGTH=1904                                                                                                                                                             |
| ATSG24200 | UCUGGUGAUGAGGGAUCUUAUC | 123   | 3   | Cleavage    | [ Symbols:   alpha/beta-Hydrolases superfamily protein   chr5:8203003-8205793 FORWARD LENGTH=1390                                                                                                                                                     |
| ATSG24220 | UUGAUCAAGUAGUGACUACU   | 4031  | 3.5 | Cleavage    | [ Symbols:   Lipase class 3-related protein   chr5:8225861-8227551 FORWARD LENGTH=1131                                                                                                                                                                |
| ATSG24300 | UGAAGGAUUUGUGGUUACCA   | 474   | 4.5 | Cleavage    | [ Symbols: SS11, SS1, ATSS1   Glycogen/starch synthases, ADP-glucose type   chr5:8266798-8271196 FORWARD LENGTH=2431                                                                                                                                  |
| ATSG24450 | ACAAACUGUUGAACAAAGCCU  | 1107  | 5   | Cleavage    | [ Symbols:   Transcription factor IIIC, subunit 5   chr5:8348242-8353303 FORWARD LENGTH=2003                                                                                                                                                          |
| ATSG24490 | UAGAGUGUUCUAGUAGUUGCA  | 232   | 3   | Cleavage    | [ Symbols:   30S ribosomal protein, putative   chr5:8365601-8367460 FORWARD LENGTH=1298                                                                                                                                                               |
| ATSG24550 | CGGAUUCUGAUGCAUGUGUGU  | 186   | 2.5 | Cleavage    | [ Symbols: BGLU32   beta glucosidase 32   chr5:8392059-8395302 REVERSE LENGTH=1605                                                                                                                                                                    |
| ATSG24590 | UGAGCCGACAAGAGUAUGAUUC | 111   | 4   | Cleavage    | [ Symbols: ANAC091, TIP   TCV-interacting protein   chr5:8416662-8418933 REVERSE LENGTH=1824                                                                                                                                                          |
| ATSG24740 | UCUGGGUAGUUGGGAUUCUAUC | 123   | 4.5 | Cleavage    | [ Symbols:   Protein of unknown function (DUF1162)   chr5:8469951-8489703 REVERSE LENGTH=10517                                                                                                                                                        |
| ATSG24750 | UGGCGUACAUCUUGCAAGUUG  | 10625 | 4.5 | Cleavage    | [ Symbols:   UDP-Glycosyltransferase superfamily protein   chr5:8490572-8494587 REVERSE LENGTH=1863                                                                                                                                                   |
| ATSG24810 | UGAGGCGCCUACUUAUGAGA   | 679   | 4.5 | Cleavage    | [ Symbols: CYP714A1   cytochrome P450, family 714, subfamily A, polypeptide 1   chr5:8567581-8570358 REVERSE LENGTH=1790                                                                                                                              |
| ATSG25000 | UGACACGAUUCUUAUGAUCU   | 823   | 4   | Cleavage    | [ Symbols:   unknown protein; Has 1807 Blast hits to 1807 proteins in 277 species: Archae - 0; Bacteria - 0; Metazoa - 736; Fungi - 347; Plants - 385; Viruses - 0; Other Eukaryotes - 339 (source: NCBI BLink).   chr5:8613966-8614331 REVERSE LEN   |
| ATSG25030 | UCUUGUUAUGAUGUGGUUACCC | 110   | 3.5 | Translation | [ Symbols:   Domain of unknown function (DUF2431)   chr5:8620083-8620991 REVERSE LENGTH=582                                                                                                                                                           |
| ATSG25070 | UAGAGUUAAGUUGGGACAGGA  | 199   | 2.5 | Translation | [ Symbols:   unknown protein; FUNCTIONS IN: molecular_function unknown; INVOLVED IN: biological_process unknown; LOCATED IN: cellular_component unknown; EXPRESSED IN: 23 plant structures; EXPRESSED DURING: 13 growth stages; Has                   |
| ATSG25100 | UUUUCGACUGAGGUAAGCGCC  | 154   | 4.5 | Translation | [ Symbols:   Endomembrane protein 70 protein family   chr5:8648103-8651137 REVERSE LENGTH=2328                                                                                                                                                        |
| ATSG25110 | UUGGACGCCUCUACUAUGAGA  | 679   | 4.5 | Cleavage    | [ Symbols: CIPK25, SNRK3.25   CBL-interacting protein kinase 25   chr5:8657626-8659322 REVERSE LENGTH=1697                                                                                                                                            |
| ATSG25250 | UGUUGAUCCAAGUAGUGACU   | 608   | 4   | Cleavage    | [ Symbols:   SPFH/Band 7/PHB domain-containing membrane-associated protein family   chr5:8749727-8751636 FORWARD LENGTH=1666                                                                                                                          |
| ATSG25310 | UCGAGUGACUUGGAGGCCAUUC | 244   | 3.5 | Cleavage    | [ Symbols:   Exostoin family protein   chr5:8784820-8787366 FORWARD LENGTH=1574                                                                                                                                                                       |
| ATSG25510 | UACUUCGACGGUUCUGAAGCC  | 826   | 4   | Cleavage    | [ Symbols:   Protein phosphatase 2A regulatory B subunit family protein   chr5:8882468-8884834 REVERSE LENGTH=2153                                                                                                                                    |
| ATSG25560 | UGUGGAUACAAGACUGGGCU   | 215   | 5   | Cleavage    | [ Symbols:   CHY-type/CTCHY-type/RING-type Zinc finger protein   chr5:8897871-8901709 FORWARD LENGTH=2735                                                                                                                                             |
| ATSG25910 | UUUCUACGACUGGAUAGGACU  | 265   | 3   | Translation | [ Symbols: ATRLP52, RLP52   receptor like protein 52   chr5:9038860-9041377 FORWARD LENGTH=2436                                                                                                                                                       |
| ATSG25980 | UAUGGAUGAUGACCGAAUGGC  | 937   | 3   | Cleavage    | [ Symbols: TGG2, BGLU37   glucoside glucosyltransferase 2   chr5:9072727-9075690 FORWARD LENGTH=1857                                                                                                                                                  |
| ATSG26010 | CGAGAGUUAUCAGGGACUUGU  | 3198  | 3.5 | Translation | [ Symbols:   Protein phosphatase 2C family protein   chr5:9085393-9087372 REVERSE LENGTH=1115                                                                                                                                                         |
| ATSG26180 | UCUCAUGUAGUUCUAGUUGCGG | 207   | 3   | Cleavage    | [ Symbols:   S-adenosyl-L-methionine-dependent methyltransferases superfamily protein   chr5:9149227-9153502 FORWARD LENGTH=2113                                                                                                                      |
| ATSG26240 | UGAGAGCAUCUACCCAGCUGUA | 230   | 4   | Cleavage    | [ Symbols: CLC-D, ATCLC-D   chloride channel D   chr5:9189524-9194731 FORWARD LENGTH=2861                                                                                                                                                             |
| ATSG26250 | UGSGUGUACUUCUACGAGCU   | 112   | 5   | Cleavage    | [ Symbols:   Major facilitator superfamily protein   chr5:9196758-9198801 FORWARD LENGTH=1644                                                                                                                                                         |
| ATSG26260 | UUGAGGUGAAGAACAUUACCU  | 1291  | 4   | Cleavage    | [ Symbols:   TRAF-like family protein   chr5:9200463-9202400 FORWARD LENGTH=1332                                                                                                                                                                      |
| ATSG26270 | CGAGAGUUAUCAGGGACUUGU  | 1398  | 3.5 | Cleavage    | [ Symbols:   unknown protein; Has 1807 Blast hits to 1807 proteins in 277 species: Archae - 0; Bacteria - 0; Metazoa - 736; Fungi - 347; Plants - 385; Viruses - 0; Other Eukaryotes - 339 (source: NCBI BLink).   chr5:9206508-9207512 FORWARD LEN   |
| ATSG26290 | UUACGGGUGAAGAACUUAUGCU | 1291  | 4   | Cleavage    | [ Symbols:   TRAF-like family protein   chr5:9226079-9227873 FORWARD LENGTH=1002                                                                                                                                                                      |
| ATSG26310 | UCGAGACCUACUGUACUUGCG  | 100   | 4.5 | Cleavage    | [ Symbols:   UGT72E3   UDP-Glycosyltransferase superfamily protein   chr5:9234685-9236385 FORWARD LENGTH=1701                                                                                                                                         |
| ATSG26360 | UGACGGUUCAGAUACGAGGAC  | 107   | 2.5 | Cleavage    | [ Symbols:   TCP-1/cpn60 chaperonin family protein   chr5:9255053-9258991 REVERSE LENGTH=2276                                                                                                                                                         |
| ATSG26570 | UGAGACACACAGGAGAGAUUC  | 244   | 4.5 | Cleavage    | [ Symbols:   WBO, OK1, ATGWD3   catalytic/carbohydrate kinases:phosphoglucan, water dikinases   chr5:9261580-9267729 FORWARD LENGTH=3783                                                                                                              |
| ATSG26600 | UUACGAGACUCUACGCCAACU  | 447   | 4   | Cleavage    | [ Symbols:   Pyridoxal phosphate (PLP)-dependent transferases superfamily protein   chr5:9377402-9379018 FORWARD LENGTH=1617                                                                                                                          |
| ATSG26740 | UGAGAACGUCUGCCAUUGGA   | 158   | 3   | Cleavage    | [ Symbols:   Protein of unknown function (DUF300)   chr5:9291936-9294608 FORWARD LENGTH=1749                                                                                                                                                          |
| ATSG26920 | UGUCUUAUCCGGAUCGUCUGU  | 150   | 4.5 | Translation | [ Symbols: CBP60G   Cam-binding protein 60-like G   chr5:9475682-9478751 FORWARD LENGTH=2149                                                                                                                                                          |
| ATSG26980 | UAUGGAUGAUGAUGCAUUGCC  | 937   | 3.5 | Cleavage    | [ Symbols: SYPA1, ATSYPA1, ATTLG2A   syntaxin of plants 41   chr5:9488150-9490816 REVERSE LENGTH=1671                                                                                                                                                 |
| ATSG27010 | UUGGCAUCGAAUUGAAGACUA  | 339   | 3.5 | Cleavage    | [ Symbols:   ARM repeat superfamily protein   chr5:9503315-9507569 REVERSE LENGTH=2592                                                                                                                                                                |
| ATSG27060 | UGGCACUACAUUCUGCAAGGU  | 834   | 4   | Translation | [ Symbols: ATRLP53, RLP53   receptor like protein 53   chr5:9522534-9525407 REVERSE LENGTH=2874                                                                                                                                                       |
| ATSG27100 | CAGAAGCCGACGACACUUCG   | 169   | 4.5 | Translation | [ Symbols:   ATGLR2.1, GLR2.1   glutamate receptor 2.1   chr5:9530599-9538333 REVERSE LENGTH=2829                                                                                                                                                     |
| ATSG27238 | UAUGAUUUCUACUACAAGGGC  | 128   | 4.5 | Cleavage    | [ Symbols:   Plant self-incompatibility protein S1 family   chr5:9593904-9594434 REVERSE LENGTH=531                                                                                                                                                   |
| ATSG27240 | CAAAUUCUUCACAUUCUUCUC  | 197   | 1.5 | Cleavage    | [ Symbols:   DNAJ heat shock N-terminal domain-containing protein   chr5:9597552-9600866 FORWARD LENGTH=3315                                                                                                                                          |
| ATSG27330 | UAUCUGUUCUUAUACGAACCU  | 295   | 4   | Cleavage    | [ Symbols:   Prefoldin chaperone subunit family protein   chr5:9632703-9634980 REVERSE LENGTH=2278                                                                                                                                                    |
| ATSG27360 | UCGGUAGUUCUUCUUCUACGA  | 125   | 4.5 | Translation | [ Symbols: SPZ2   Major facilitator superfamily protein   chr5:9657026-9662559 FORWARD LENGTH=1664                                                                                                                                                    |
| ATSG27395 | UAACCGUAGUGGCUUACCAAG  | 3223  | 4   | Translation | [ Symbols:   Mitochondrial inner membrane translocase complex, subunit Tim44-related protein   chr5:9671496-9674119 REVERSE LENGTH=1274                                                                                                               |
| ATSG27490 | UUUCCCUAGAAUUCUUAUCCU  | 1646  | 4.5 | Cleavage    | [ Symbols:   Integral membrane Yip1 family protein   chr5:9702835-9704719 REVERSE LENGTH=1210                                                                                                                                                         |

|           |                         |      |                 |                                                                                                                                                                                                                                                                                                                                      |
|-----------|-------------------------|------|-----------------|--------------------------------------------------------------------------------------------------------------------------------------------------------------------------------------------------------------------------------------------------------------------------------------------------------------------------------------|
| ATSG27580 | UACCCGUACGUCGUUACAAG    | 3223 | 4.5 Translation | [ Symbols: AGL89   AGAMOUS-like 89   chr5:9736651-9737322 FORWARD LENGTH=672                                                                                                                                                                                                                                                         |
| ATSG27600 | UCCCGGAUUGCGAAGAAGUA    | 113  | 3 Cleavage      | [ Symbols: LACS7, ATLAS7   long-chain acyl-CoA synthetase 7   chr5:9742576-9747005 FORWARD LENGTH=2353                                                                                                                                                                                                                               |
| ATSG27620 | UUCUUCAGACUGGAUAGGACU   | 265  | 4.5 Translation | [ Symbols: CYCH.1   cyclin H.1   chr5:9771324-9774875 FORWARD LENGTH=1640                                                                                                                                                                                                                                                            |
| ATSG27660 | UUUCCGUUUGAACUCGAGUA    | 114  | 3.5 Cleavage    | [ Symbols:   Trypsin family protein with PDZ domain   chr5:9789468-9792299 REVERSE LENGTH=1718                                                                                                                                                                                                                                       |
| ATSG27680 | UUCGAGCGUUCUGUAGCCAAC   | 156  | 4 Cleavage      | [ Symbols: RECQSIM   RECQ helicase SIM   chr5:9793790-979861 REVERSE LENGTH=3259                                                                                                                                                                                                                                                     |
| ATSG27800 | UACCCGUACGUCGUUUAJAG    | 185  | 4.5 Translation | [ Symbols:   Class II aminoacyl-tRNA and biotin synthetases superfamily protein   chr5:9842412-9843804 FORWARD LENGTH=1029                                                                                                                                                                                                           |
| ATSG27850 | UAUAGGGUUGAAGAAGAAAG    | 535  | 4 Cleavage      | [ Symbols:   Ribosomal protein L18e/L15 superfamily protein   chr5:9873152-9874558 FORWARD LENGTH=882                                                                                                                                                                                                                                |
| ATSG28080 | UUAAGGGUGAAGAACUAGACU   | 1291 | 4 Cleavage      | [ Symbols: WNN9   Protein kinase superfamily protein   chr5:10090070-10092386 REVERSE LENGTH=1610                                                                                                                                                                                                                                    |
| ATSG28150 | UUCAGCGUGAAGAACUAGACU   | 1291 | 3 Translation   | [ Symbols:   Galactose oxidase/Kelch repeat superfamily protein   chr5:10137926-10139013 FORWARD LENGTH=975                                                                                                                                                                                                                          |
| ATSG28230 | CUAGAUAUUCUUCUUCUUCU    | 235  | 2.5 Translation | [ Symbols:   pseudogene, similar to glucose-6-phosphate-phosphate-translocator precursor, contains similarity to glucose-6-phosphate/phosphate-translocator precursors; blastp match of 78% identity and 1.6e-75 P-value to GP 2997591 gb AF                                                                                         |
| ATSG28400 | UACAAUAUUCGAGCAUCCUCG   | 156  | 4 Cleavage      | [ Symbols:   unknown protein; BEST Arabidopsis thaliana protein match is: unknown protein (TAIR:AT5G28320.1); Has 2580 Blast hits to 2028 proteins in 270 species: Archae - 20; Bacteria - 158; Metazoa - 939; Fungi - 198; Plants - 144; Viruses - 1                                                                                |
| ATSG28410 | AUUGUGUAUAUUAUUGAGCCU   | 108  | 4 Cleavage      | [ Symbols:   unknown protein; Has 8 Blast hits to 7 proteins in 2 species: Archae - 0; Bacteria - 0; Metazoa - 0; Fungi - 0; Plants - 8; Viruses - 0; Other Eukaryotes - 0 (source: NCBI BLink).   chr5:10358373-10359438 FORWARD LENGTH=321                                                                                         |
| ATSG28510 | UUCUGACGGACAAGUAUAGCU   | 313  | 3.5 Cleavage    | [ Symbols: BGLU24   beta glucosidase 24   chr5:10481041-10484022 REVERSE LENGTH=1602                                                                                                                                                                                                                                                 |
| ATSG28640 | UCCACAUUGCGAGCUCUGUACC  | 187  | 4 Cleavage      | [ Symbols: AN3, GIF, GIF1, ATGF1   SSXT family protein   chr5:10647570-10649892 REVERSE LENGTH=1166                                                                                                                                                                                                                                  |
| ATSG28730 | UCAAAGGCAUUGGAGAGUAUUGU | 102  | 4 Cleavage      | [ Symbols:   unknown protein; BEST Arabidopsis thaliana protein match is: unknown protein (TAIR:AT1G43722.1); Has 496 Blast hits to 496 proteins in 68 species: Archae - 0; Bacteria - 0; Metazoa - 3; Fungi - 23; Plants - 470; Viruses - 0; Other Eukaryotes - 0 (source: NCBI BLink).   chr5:12981645-12982497 FORWARD LENGTH=468 |
| ATSG28823 | UAUGCUUCUGUAUUAUUGCCU   | 344  | 3 Translation   | [ Symbols:   FUNCTIONS IN: molecular_function unknown; INVOLVED IN: biological_process unknown; LOCATED IN: cellular_component unknown; EXPRESSED IN: cultured cell; BEST Arabidopsis thaliana protein match is: Zinc knuckle (CCHC-type                                                                                             |
| ATSG28840 | UACACUCGCAUCUUAAGAACUG  | 146  | 4.5 Cleavage    | [ Symbols: GME   GDP-D-mannose 3',5'-epimerase   chr5:10862173-10864903 REVERSE LENGTH=1612                                                                                                                                                                                                                                          |
| ATSG28850 | UAUGAGUUGAUGGACGAAGAUA  | 123  | 4 Translation   | [ Symbols:   Calcium-binding EF-hand family protein   chr5:10876815-10881444 REVERSE LENGTH=2413                                                                                                                                                                                                                                     |
| ATSG28910 | UUCGAGCAUCUCCUGACCGCA   | 160  | 4 Cleavage      | [ Symbols:   unknown protein; FUNCTIONS IN: molecular_function unknown; INVOLVED IN: biological_process unknown; BEST Arabidopsis thaliana protein match is: unknown protein (TAIR:AT5G28960.1); Has 82 Blast hits to 80 proteins in 14 sp                                                                                           |
| ATSG29040 | UCUAGUUCGCAUUUUUUGGAC   | 421  | 3 Cleavage      | [ Symbols:   pseudogene, hypothetical protein   chr5:11094905-11098337 REVERSE LENGTH=3433                                                                                                                                                                                                                                           |
| ATSG32470 | UAGCUACAAGAAACUUCUUUC   | 1828 | 4 Cleavage      | [ Symbols:   Haem oxygenase-like, multi-helical   chr5:12084899-12088603 REVERSE LENGTH=2317                                                                                                                                                                                                                                         |
| ATSG34830 | UUAUGCAACAUGUAGUCAGUCU  | 4031 | 3.5 Cleavage    | [ Symbols:   unknown protein; Has 19 Blast hits to 19 proteins in 6 species: Archae - 0; Bacteria - 0; Metazoa - 3; Fungi - 0; Plants - 16; Viruses - 0; Other Eukaryotes - 0 (source: NCBI BLink).   chr5:12981645-12982497 FORWARD LENGTH=468                                                                                      |
| ATSG34869 | UUCGAGCAUCCUUGUAGUACGA  | 1272 | 4 Translation   | [ Symbols:   unknown protein; Has 17 Blast hits to 14 proteins in 2 species: Archae - 0; Bacteria - 0; Metazoa - 0; Fungi - 0; Plants - 17; Viruses - 0; Other Eukaryotes - 0 (source: NCBI BLink).   chr5:13061035-13062230 FORWARD LENGTH=1196                                                                                     |
| ATSG35180 | UUCGAGCAUUGGAUUAUACAC   | 101  | 2.5 Cleavage    | [ Symbols:   Protein of unknown function (DUF1336)   chr5:13424418-13413018 FORWARD LENGTH=2787                                                                                                                                                                                                                                      |
| ATSG35360 | UUCGCGAGGAGAGCGUCCUC    | 112  | 4 Cleavage      | [ Symbols: CAC2   acetyl Co-enzyme A carboxylase biotin carboxylase subunit   chr5:13584158-13588496 FORWARD LENGTH=1984                                                                                                                                                                                                             |
| ATSG35370 | UGACUCGCUAGGUGUGCGAG    | 378  | 5 Cleavage      | [ Symbols:   S-locus lectin protein kinase family protein   chr5:13588433-13591271 REVERSE LENGTH=2839                                                                                                                                                                                                                               |
| ATSG35560 | UGAGAAACGCGUCGCCAUUGGA  | 158  | 5 Cleavage      | [ Symbols:   DENN (AEX-3) domain-containing protein   chr5:13742109-13748312 REVERSE LENGTH=2923                                                                                                                                                                                                                                     |
| ATSG35750 | UUUAGGUAUUGUUGCAUAUGCA  | 1164 | 4 Cleavage      | [ Symbols: AHK2, HK2   histidine kinase 2   chr5:13911371-13916337 REVERSE LENGTH=3903                                                                                                                                                                                                                                               |
| ATSG35796 | UGACGGACAAGUAUUGAGUCCU  | 1505 | 4.5 Cleavage    | [ Symbols:   pseudogene, similar to Putative protein kinase, blastp match of 29% identity and 1.6e-16 P-value to GP 21671940 gb AAM74302.1 AC083944_20 AC083944 Putative protein kinase [Oryza sativa (japonica cultivar-group)]   chr5:135                                                                                          |
| ATSG35995 | UAUUGCGUCGAGUAUAGAGCCU  | 517  | 4 Cleavage      | [ Symbols:   F-box/RN1-like superfamily protein   chr5:14136590-14138514 REVERSE LENGTH=1536                                                                                                                                                                                                                                         |
| ATSG36680 | UGGGCGCUUAUUAUUGGGUUC   | 115  | 3.5 Translation | [ Symbols:   Protein of Unknown Function (DUF239)   chr5:14406802-14409137 REVERSE LENGTH=1002                                                                                                                                                                                                                                       |
| ATSG36770 | UGGGCGCUUAUUAUUGGGUUC   | 115  | 3.5 Translation | [ Symbols:   Protein of Unknown Function (DUF239)   chr5:14466102-14468486 REVERSE LENGTH=1051                                                                                                                                                                                                                                       |
| ATSG36880 | UGUCACGCUAGUAUUUCUUCU   | 123  | 3 Translation   | [ Symbols: ACS   acetyl-CoA synthetase   chr5:14534700-14540245 REVERSE LENGTH=2540                                                                                                                                                                                                                                                  |
| ATSG37017 | UUUAGAGACUCUAGCCAGCAUC  | 149  | 3.5 Translation | [ Symbols:   Pseudogene of AT5G16486   chr5:14628221-14628847 REVERSE LENGTH=627                                                                                                                                                                                                                                                     |
| ATSG37160 | UUGAGAGAUCCUUGUUAUCUG   | 3917 | 4 Cleavage      | [ Symbols:   P-loop containing nucleoside triphosphate hydrolases superfamily protein   chr5:14705426-14708376 FORWARD LENGTH=2616                                                                                                                                                                                                   |
| ATSG37180 | UACGCUAGGAGAUUUAUCUGCC  | 122  | 4.5 Cleavage    | [ Symbols: SUS5, ATSU55   sucrose synthase 5   chr5:14718238-14722913 FORWARD LENGTH=2511                                                                                                                                                                                                                                            |
| ATSG37210 | UUGGCAUCGAUUAUUGAUAUCA  | 339  | 3.5 Cleavage    | [ Symbols:   Cysteine/Histidine-rich C1 domain family protein   chr5:14729225-14731508 REVERSE LENGTH=2034                                                                                                                                                                                                                           |
| ATSG37260 | CUUGCGCAUGCAUUAUUGAUCU  | 1059 | 3.5 Cleavage    | [ Symbols: RVE2, CIR1   Homeodomain-like superfamily protein   chr5:14751344-14753088 REVERSE LENGTH=980                                                                                                                                                                                                                             |
| ATSG37290 | UUUAACAACUAAGGUUUCUGU   | 1055 | 4 Cleavage      | [ Symbols:   ARM repeat superfamily protein   chr5:14762370-14764344 FORWARD LENGTH=937                                                                                                                                                                                                                                              |
| ATSG37352 | UCUGUAGCAUUAUUGUGGAC    | 1212 | 4 Cleavage      | [ Symbols:   Pseudogene of AT2G5010   chr5:14796126-14797001 FORWARD LENGTH=790                                                                                                                                                                                                                                                      |
| ATSG37380 | UGCAUAACUUGGGCAUUAUCCU  | 413  | 4 Cleavage      | [ Symbols:   Chaperone DnaJ-domain superfamily protein   chr5:14816761-14819087 REVERSE LENGTH=1718                                                                                                                                                                                                                                  |
| ATSG37420 | UACAAGAACUUCUUCUUAUUCU  | 235  | 3 Cleavage      | [ Symbols:   Family of unknown function (DUF577)   chr5:14840143-14842070 FORWARD LENGTH=1740                                                                                                                                                                                                                                        |
| ATSG37430 | UGCGAGGACGUGCAUUAUGCU   | 401  | 4.5 Cleavage    | [ Symbols:   Family of unknown function (DUF577)   chr5:14842430-14844308 FORWARD LENGTH=1824                                                                                                                                                                                                                                        |
| ATSG37480 | UUUAACAACUAAGGUUUCUGU   | 1055 | 4.5 Cleavage    | [ Symbols:   unknown protein; Has 30201 Blast hits to 17322 proteins in 780 species: Archae - 12; Bacteria - 1396; Metazoa - 17338; Fungi - 3422; Plants - 5037; Viruses - 0; Other Eukaryotes - 2996 (source: NCBI BLink).   chr5:14884311-1488596                                                                                  |
| ATSG37630 | UCCACCCGACUGAAGCAAAUGU  | 1524 | 4.5 Cleavage    | [ Symbols: EMB2656   ARM repeat superfamily protein   chr5:14947330-14952765 FORWARD LENGTH=3452                                                                                                                                                                                                                                     |
| ATSG37732 | UACCCUCGCAUCUUAAGAACUG  | 146  | 4.5 Translation | [ Symbols:   unknown pseudogene   chr5:14987706-14988261 REVERSE LENGTH=380                                                                                                                                                                                                                                                          |
| ATSG37790 | UUGAUCCAAGUAGCUGACUCU   | 4031 | 4 Cleavage      | [ Symbols:   Protein kinase superfamily protein   chr5:15008172-15011152 REVERSE LENGTH=2047                                                                                                                                                                                                                                         |
| ATSG38000 | UUUCUGACGGACAAGUAAGU    | 480  | 3.5 Cleavage    | [ Symbols:   Zinc-binding dehydrogenase family protein   chr5:15141788-15143492 FORWARD LENGTH=1209                                                                                                                                                                                                                                  |
| ATSG38010 | UUUGAGUGUUGUUGGAGGUCU   | 141  | 4 Cleavage      | [ Symbols:   UDP-Glycosyltransferase superfamily protein   chr5:15158275-15160212 FORWARD LENGTH=1523                                                                                                                                                                                                                                |
| ATSG38110 | UAGCUACAAGAACUUCUUCU    | 1828 | 4.5 Cleavage    | [ Symbols: SUSG1, SGA01, ASF1B   anti-silencing function 1b   chr5:15208470-15210215 FORWARD LENGTH=981                                                                                                                                                                                                                              |
| ATSG38130 | UUCGAGAACUAUAAUGAUAUGU  | 448  | 4.5 Cleavage    | [ Symbols:   HXXXD-type acyl-transferase family protein   chr5:15217910-15219372 REVERSE LENGTH=1463                                                                                                                                                                                                                                 |
| ATSG38140 | UAUGGCGUGGGAGCAUUGCGA   | 299  | 3.5 Cleavage    | [ Symbols: NF-YC12   nuclear factor Y, subunit C12   chr5:15220208-15222272 REVERSE LENGTH=890                                                                                                                                                                                                                                       |
| ATSG38240 | UUGUACACUGCGAAUUCUGGGA  | 271  | 4.5 Cleavage    | [ Symbols:   Protein kinase family protein   chr5:15277239-15279317 REVERSE LENGTH=1767                                                                                                                                                                                                                                              |
| ATSG38300 | UAGUGAUAUUCUGAUCAUUAUC  | 114  | 2.5 Cleavage    | [ Symbols:   unknown protein; FUNCTIONS IN: molecular_function unknown; INVOLVED IN: biological_process unknown; LOCATED IN: cellular_component unknown; EXPRESSED IN: 12 plant structures; EXPRESSED DURING: 6 growth stages; BEST                                                                                                  |
| ATSG38386 | UACGCUUUGUAGUACAUUACU   | 133  | 3.5 Cleavage    | [ Symbols:   F-box/RN1-like superfamily protein   chr5:15361378-15364815 FORWARD LENGTH=1212                                                                                                                                                                                                                                         |
| ATSG38565 | AAACAGGACAAGUUAUCGCCG   | 986  | 4 Cleavage      | [ Symbols:   F-box/FBD-like domains containing protein   chr5:15444310-15446009 REVERSE LENGTH=1311                                                                                                                                                                                                                                  |
| ATSG38590 | UGAGUGAUAUUGAUCUUAUUAUC | 114  | 4 Cleavage      | [ Symbols:   F-box/RN1-like/FBD-like domains-containing protein   chr5:15451933-15453885 REVERSE LENGTH=1700                                                                                                                                                                                                                         |
| ATSG38670 | UUAGAGUAUUCUCCUGUUAUCUG | 106  | 3 Translation   | [ Symbols:   Galactose oxidase/Kelch repeat superfamily protein   chr5:15475786-15476871 FORWARD LENGTH=876                                                                                                                                                                                                                          |
| ATSG38740 | UCUAGUUCGCGUUCUUCAGAC   | 300  | 3.5 Translation | [ Symbols: AGL77   AGAMOUS-like 77   chr5:15513025-15514305 REVERSE LENGTH=1281                                                                                                                                                                                                                                                      |
| ATSG38895 | UAACAAGAACUUCUUCUUUUCU  | 235  | 4.5 Cleavage    | [ Symbols:   RING/U-box superfamily protein   chr5:15571254-15573416 FORWARD LENGTH=1059                                                                                                                                                                                                                                             |
| ATSG38940 | UUUAACAACUAAGGUUUCUGU   | 1055 | 4.5 Cleavage    | [ Symbols:   Rmlc-like cupins superfamily protein   chr5:15588757-15589666 FORWARD LENGTH=826                                                                                                                                                                                                                                        |
| ATSG39210 | UGAAGGACAAGCUACGUCGU    | 1483 | 4 Cleavage      | [ Symbols: CRR7   chlororespiratory reduction 7   chr5:15703121-15704104 FORWARD LENGTH=686                                                                                                                                                                                                                                          |
| ATSG39350 | UCGAGUAGGAGCCUGAGUCAUG  | 250  | 3 Cleavage      | [ Symbols:   Tetratricopeptide repeat (TPR)-like superfamily protein   chr5:15750929-15752962 FORWARD LENGTH=2034                                                                                                                                                                                                                    |
| ATSG39380 | CUUCCCUAGAAUUCUUUCCU    | 101  | 3.5 Cleavage    | [ Symbols:   Plant calmodulin-binding protein-related   chr5:15758717-15760686 REVERSE LENGTH=1970                                                                                                                                                                                                                                   |
| ATSG39460 | UAACCGGGCAUGAGAGACUCU   | 400  | 3.5 Translation | [ Symbols:   F-box family protein   chr5:15788289-15790004 REVERSE LENGTH=1716                                                                                                                                                                                                                                                       |
| ATSG39471 | UUAGAGAUCCUUGUUAUACUG   | 141  | 4 Cleavage      | [ Symbols:   Cysteine/Histidine-rich C1 domain family protein   chr5:15793965-15795596 REVERSE LENGTH=1632                                                                                                                                                                                                                           |
| ATSG39530 | UACCGGAGGACGUAUACUAGCU  | 401  | 4 Translation   | [ Symbols:   Protein of unknown function (DUF1997)   chr5:15826089-15828035 REVERSE LENGTH=1434                                                                                                                                                                                                                                      |
| ATSG39840 | UCUGAAUCUAAAGCACCACAA   | 493  | 4 Cleavage      | [ Symbols:   ATP-dependent RNA helicase, mitochondrial, putative   chr5:15946769-15949186 FORWARD LENGTH=2331                                                                                                                                                                                                                        |
| ATSG39865 | UUUGGGAUUCUGUAGUCUGUA   | 152  | 4 Cleavage      | [ Symbols:   Glutaredoxin family protein   chr5:15965461-15967173 REVERSE LENGTH=1713                                                                                                                                                                                                                                                |
| ATSG39880 | UGAGAGCAUAGGAGCAUUAUC   | 244  | 3.5 Cleavage    | [ Symbols:   unknown protein; FUNCTIONS IN: molecular_function unknown; INVOLVED IN: biological_process unknown; LOCATED IN: endomembrane system; EXPRESSED IN: 10 plant structures; EXPRESSED DURING: L mature pollen stage, M ge                                                                                                   |
| ATSG39890 | UAACCAAGACCGCUAGUCCGU   | 125  | 3 Cleavage      | [ Symbols:   Protein of unknown function (DUF1637)   chr5:15974393-15976270 FORWARD LENGTH=1238                                                                                                                                                                                                                                      |
| ATSG39960 | CAUGCAUUUUGUUAUCACCGGA  | 285  | 3 Cleavage      | [ Symbols:   GTP binding-GTP binding   chr5:15994021-15997058 FORWARD LENGTH=2278                                                                                                                                                                                                                                                    |
| ATSG39980 | UAUGGCGUGGGAGCAUUGCCA   | 299  | 4.5 Translation | [ Symbols:   Tetratricopeptide repeat (TPR)-like superfamily protein   chr5:16000712-16003072 REVERSE LENGTH=2361                                                                                                                                                                                                                    |
| ATSG39990 | UAUCUUCACGGCUUCUUGUAGCC | 826  | 4 Cleavage      | [ Symbols:   Core-2/-branching beta-1,6-N-acetylglucosaminyltransferase family protein   chr5:16004281-16006740 FORWARD LENGTH=1869                                                                                                                                                                                                  |
| ATSG40030 | UAUCUCUGUCGUUACGACACU   | 295  | 4.5 Cleavage    | [ Symbols:   Protein kinase superfamily protein   chr5:16026227-16028283 FORWARD LENGTH=1500                                                                                                                                                                                                                                         |
| ATSG40070 | UCUAGUUCGCGUUCUUCAGAC   | 300  | 3.5 Translation | [ Symbols:   MADS-box family protein   chr5:16039179-16039747 FORWARD LENGTH=474                                                                                                                                                                                                                                                     |
| ATSG40100 | ACAAACUGUUGAACAAGCCU    | 1107 | 4 Cleavage      | [ Symbols:   Disease resistance protein (TIR-NBS-LRR class) family   chr5:16043929-16047355 FORWARD LENGTH=3101                                                                                                                                                                                                                      |
| ATSG40220 | UCUAGUUCGCGUUCUUCAGAC   | 300  | 4 Translation   | [ Symbols: AGL43   AGAMOUS-like 43   chr5:16078390-16079364 REVERSE LENGTH=975                                                                                                                                                                                                                                                       |
| ATSG40300 | UGACUCGCUAGGUGUGCGAG    | 278  | 4.5 Cleavage    | [ Symbols:   Uncharacterised protein family (UPF0497)   chr5:16110688-16112968 FORWARD LENGTH=1170                                                                                                                                                                                                                                   |
| ATSG40490 | UAUCUUCUUGUUCUUCGUCUC   | 310  | 4 Cleavage      | [ Symbols:   RNA-binding (RRM/RBD/RNP motifs) family protein   chr5:16225376-16227709 FORWARD LENGTH=1665                                                                                                                                                                                                                            |
| ATSG40700 | UAUCGAGCAACUACGUCAUUGU  | 142  | 4 Translation   | [ Symbols:   unknown protein; FUNCTIONS IN: molecular_function unknown; INVOLVED IN: biological_process unknown; BEST Arabidopsis thaliana protein match is: unknown protein (TAIR:AT3G27350.1); Has 30201 Blast hits to 17322 proteins i                                                                                            |
| ATSG40820 | UGAGCCGACAAGAGUAUUAUCU  | 111  | 3 Cleavage      | [ Symbols: ATRAD3, ATR, ATATR   Ataxia telangiectasia-mutated and RAD3-related   chr5:16342745-16353898 REVERSE LENGTH=9189                                                                                                                                                                                                          |
| ATSG40840 | UCUAGUACAUUUUUUCGGAC    | 4227 | 3.5 Translation | [ Symbols: SynD2   Rad21/Rec8-like family protein   chr5:16359430-16363792 REVERSE LENGTH=2649                                                                                                                                                                                                                                       |
| ATSG40890 | CAACGCUUCUGUAUCAUUAUC   | 133  | 3 Cleavage      | [ Symbols: ATCLC-A, CLC-A, CLCA, ATCLCA   chloride channel A   chr5:16381314-16384319 REVERSE LENGTH=2669                                                                                                                                                                                                                            |
| ATSG40981 | UGAAUUCUGGUAACUUGGACC   | 197  | 5 Cleavage      | [ Symbols:   unknown protein; Has 30201 Blast hits to 17322 proteins in 780 species: Archae - 12; Bacteria - 1396; Metazoa - 17338; Fungi - 3422; Plants - 5037; Viruses - 0; Other Eukaryotes - 2996 (source: NCBI BLink).   chr5:16415857-1641595                                                                                  |
| ATSG41020 | UUACCGUAGUCUUGUUAUAG    | 267  | 4.5 Cleavage    | [ Symbols:   myb family transcription factor   chr5:16425883-16427797 REVERSE LENGTH=1915                                                                                                                                                                                                                                            |
| ATSG41030 | UUAGAGCAUUGUUGAUCAGC    | 926  | 4 Cleavage      | [ Symbols:   TCP family transcription factor   chr5:16428706-16429437 FORWARD LENGTH=732                                                                                                                                                                                                                                             |
| ATSG41190 | UUAGACGACAACUCCCGUCCU   | 170  | 4.5 Cleavage    | [ Symbols:   CONTAINS InterPro DOMAIN(s): Nin one binding [NOB1] Zn-ribbon like [InterPro:IPRO14881], D-site 205 pre-rRNA nuclease [InterPro:IPRO17117]; Has 1807 Blast hits to 1807 proteins in 277 species: Archae - 0; Bacteria - 0; Metazoa -                                                                                    |
| ATSG41200 | UCUAGUUCGCGUUCUUCAGAC   | 300  | 3.5 Translation | [ Symbols: AGL75   AGAMOUS-like 75   chr5:16490544-16491536 FORWARD LENGTH=993                                                                                                                                                                                                                                                       |

|           |                          |      |                 |                                                                                                                                                                                                                                                          |
|-----------|--------------------------|------|-----------------|----------------------------------------------------------------------------------------------------------------------------------------------------------------------------------------------------------------------------------------------------------|
| ATSG41310 | UUUUGCUUAGACUUAAGAAACU   | 179  | 3 Translation   | [ Symbols:   P-loop nucleoside triphosphate hydrolases superfamily protein with CH (Calponin Homology) domain   chr5:16516634-16522392 REVERSE LENGTH=2886                                                                                               |
| ATSG41315 | UAGUGACCGAGUAGACACCC     | 461  | 4.5 Cleavage    | [ Symbols: GL3, MYC6.2   basic helix-loop-helix (bHLH) DNA-binding superfamily protein   chr5:16529455-16532879 FORWARD LENGTH=1929                                                                                                                      |
| ATSG41730 | UCUGAUGCAUAUACUUGGACU    | 686  | 4.5 Cleavage    | [ Symbols:   Protein kinase family protein   chr5:16684914-16687145 REVERSE LENGTH=2136                                                                                                                                                                  |
| ATSG41770 | UCUAGUCCGAAAUUAGCGGAAC   | 163  | 4 Translation   | [ Symbols:   crosked neck protein, putative / cell cycle protein, putative   chr5:16717996-16721222 FORWARD LENGTH=2429                                                                                                                                  |
| ATSG41880 | CUAGAAUUCUUCUCCUUUCCU    | 235  | 3.5 Cleavage    | [ Symbols:   POLA2, POLA4   DNA primases:DNA primases   chr5:16760908-16764276 FORWARD LENGTH=1620                                                                                                                                                       |
| ATSG42220 | CCACCGCAUGAUGACAACGUC    | 122  | 5 Cleavage      | [ Symbols:   Ubiquitin-like superfamily protein   chr5:16872342-16877666 FORWARD LENGTH=3009                                                                                                                                                             |
| ATSG42250 | UAGAAUUAUACUAGUUCUGGCA   | 194  | 3 Translation   | [ Symbols:   Zinc-binding alcohol dehydrogenase family protein   chr5:16894009-16897620 FORWARD LENGTH=1421                                                                                                                                              |
| ATSG42325 | CUGGAGGAGUAGACGACUUAU    | 133  | 3.5 Translation | [ Symbols:   Transcription factor IIS protein   chr5:16924102-16924851 REVERSE LENGTH=702                                                                                                                                                                |
| ATSG42540 | CAUGUCUGUAUUCGAAACUACU   | 192  | 2.5 Translation | [ Symbols: XRN2, AXRN2   exonuclease 2   chr5:17007413-17014801 FORWARD LENGTH=3406                                                                                                                                                                      |
| ATSG42567 | UUUCUUGCAGUCAGGUAAGCGCC  | 154  | 2.5 Cleavage    | [ Symbols:   Protein of unknown function (DUF784)   chr5:17018059-17018406 REVERSE LENGTH=348                                                                                                                                                            |
| ATSG42785 | UACACUCACUUGAUUAGGAG     | 223  | 4 Cleavage      | [ Symbols:   unknown protein; FUNCTION5 IN: molecular_function unknown; INVOLVED IN: biological_process unknown; LOCATED IN: endomembrane system; Has 30201 Blast hits to 17322 proteins in 780 species: Archae - 12; Bacteria - 1396; N                 |
| ATSG42800 | UGUCACCGCUAGAUUUCUUCU    | 123  | 4 Cleavage      | [ Symbols: DFR, TTT3, M3I18   dihydroflavonol 4-reductase   chr5:17164141-17165918 REVERSE LENGTH=1358                                                                                                                                                   |
| ATSG42825 | UGAAUAAAAACUGAACCAUGCC   | 263  | 2.5 Cleavage    | [ Symbols:   unknown protein; Has 35333 Blast hits to 34131 proteins in 2444 species: Archae - 798; Bacteria - 22429; Metazoa - 974; Fungi - 991; Plants - 531; Viruses - 0; Other Eukaryotes - 9610 (source: NCBI BLink).   chr5:17171964-17172742      |
| ATSG42870 | UGACACCGAUUCUGAUUGCAU    | 377  | 4.5 Cleavage    | [ Symbols: ATPAH2, PAH2   phosphatidic acid phosphohydrolase 2   chr5:17185463-17189681 REVERSE LENGTH=3049                                                                                                                                              |
| ATSG43180 | AUAGCUAACAAGAACUUCUUUCU  | 426  | 4 Translation   | [ Symbols:   Protein of unknown function, DUF599   chr5:17336330-17337872 REVERSE LENGTH=871                                                                                                                                                             |
| ATSG43260 | UCGAGGCGAGGAACAUUGACU    | 334  | 4 Cleavage      | [ Symbols:   chaperone protein dnaJ-related   chr5:17357377-17358082 REVERSE LENGTH=706                                                                                                                                                                  |
| ATSG43270 | UGAAGGACAAGAACAGCUGUCU   | 415  | 3.5 Cleavage    | [ Symbols: SPL2   squamosa promoter binding protein-like 2   chr5:17360287-17362975 REVERSE LENGTH=1678                                                                                                                                                  |
| ATSG43300 | CUUGGCAUCGAAUUGAAGACU    | 1059 | 4 Cleavage      | [ Symbols:   PLC-like phosphodiesterases superfamily protein   chr5:17376734-17379277 REVERSE LENGTH=1532                                                                                                                                                |
| ATSG43400 | UAUUGCUUCUGUUGAUCCACU    | 344  | 3.5 Translation | [ Symbols:   Uncharacterised conserved protein UCP015417, vWA   chr5:17425944-17428223 REVERSE LENGTH=2280                                                                                                                                               |
| ATSG43530 | UCCACCGCAUGACACAUGU      | 1524 | 4 Cleavage      | [ Symbols:   Helicase protein with RING/U-box domain   chr5:17489327-17494830 FORWARD LENGTH=3834                                                                                                                                                        |
| ATSG43620 | UUUCUUCCCGUUGGUGUGCGCC   | 170  | 3.5 Cleavage    | [ Symbols:   Pre-mRNA cleavage complex II   chr5:17522520-17524001 FORWARD LENGTH=1482                                                                                                                                                                   |
| ATSG43680 | UUUGAGGACACUCCAGCCGACU   | 156  | 4.5 Translation | [ Symbols:   unknown protein; EXPRESSED IN: 21 plant structures; EXPRESSED DURING: 13 growth stages.   chr5:17544029-17545752 FORWARD LENGTH=1047                                                                                                        |
| ATSG43720 | UUUGACCGCGUAUUAUUCUCC    | 275  | 3.5 Translation | [ Symbols:   Protein of unknown function (DUF2363)   chr5:17557166-17559354 REVERSE LENGTH=1371                                                                                                                                                          |
| ATSG43810 | UUUGCAGAGUAGUAGUAUACU    | 107  | 4 Cleavage      | [ Symbols: ZLL   Stabiliser of iron transporter SufB / Polynucleotideyl transferase   chr5:17610972-17616797 FORWARD LENGTH=3763                                                                                                                         |
| ATSG43860 | UAGAUAACAAGAACUCUUCUUC   | 107  | 3 Cleavage      | [ Symbols: ATLCH2, CLH2   chlorophyllase 2   chr5:17630450-17632312 FORWARD LENGTH=1127                                                                                                                                                                  |
| ATSG43960 | UAAACUAGAACCAUUGCGUAGA   | 302  | 3 Cleavage      | [ Symbols:   Nuclear transport factor 2 (NTF2) family protein with RNA binding (RRM-RBD-RNP motifs) domain   chr5:17688788-17691939 REVERSE LENGTH=2005                                                                                                  |
| ATSG44050 | UUUAGGAAUUGUUGCAUUAUGCA  | 1164 | 4 Cleavage      | [ Symbols:   MATE efflux family protein   chr5:17722484-17726379 FORWARD LENGTH=1646                                                                                                                                                                     |
| ATSG44080 | CUUGGCAUCGAUUAUUGAACUCU  | 1059 | 3.5 Cleavage    | [ Symbols:   Basic-leucine zipper (bZIP) transcription factor family protein   chr5:17738652-17739873 REVERSE LENGTH=1222                                                                                                                                |
| ATSG44090 | AUGACGAAUGUUGUAGACGCCU   | 113  | 5 Cleavage      | [ Symbols:   Calcium-binding EF-hand family protein   chr5:17742766-17748396 REVERSE LENGTH=2463                                                                                                                                                         |
| ATSG44180 | UUUCUGAAGGACAAGCUCACUCU  | 1012 | 3.5 Translation | [ Symbols:   Homeodomain-like transcriptional regulator   chr5:17783172-17790011 FORWARD LENGTH=4663                                                                                                                                                     |
| ATSG44265 | UGUGUAUGCAUUAUCUGGGAC    | 106  | 3.5 Cleavage    | [ Symbols:   Bifunctional inhibitor/lipid-transfer protein/seed storage 2S albumin superfamily protein   chr5:17832779-17833316 REVERSE LENGTH=381                                                                                                       |
| ATSG44290 | UUUUUCGGACUAGUAAGGACU    | 107  | 5 Cleavage      | [ Symbols:   Protein kinase superfamily protein   chr5:17840456-17843710 REVERSE LENGTH=2480                                                                                                                                                             |
| ATSG44635 | UUUAAACAACUAAGGUUCUGCU   | 1055 | 4 Cleavage      | [ Symbols: MCM6   minichromosome maintenance (MCM2/3/5) family protein   chr5:18006431-18010542 REVERSE LENGTH=2496                                                                                                                                      |
| ATSG44785 | CUUGUGAGUUGUUGUGAAGGUC   | 103  | 4 Cleavage      | [ Symbols: OSB3   organelle single-stranded DNA binding protein 3   chr5:18070681-18073129 REVERSE LENGTH=1638                                                                                                                                           |
| ATSG44800 | UCCACCGAUUCUGUAGCCCAAC   | 156  | 4 Cleavage      | [ Symbols: CHR4, PKR1   chromatin remodeling 4   chr5:18083419-18093452 REVERSE LENGTH=7295                                                                                                                                                              |
| ATSG44830 | AUCCAAGUAGCUGACUCUUCU    | 1104 | 3.5 Cleavage    | [ Symbols:   Pectin lyase-like superfamily protein   chr5:18100128-18101885 REVERSE LENGTH=999                                                                                                                                                           |
| ATSG44840 | UCCACGAACUAAUAGAAGUUAU   | 448  | 4 Cleavage      | [ Symbols:   Pectin lyase-like superfamily protein   chr5:18104851-18107127 REVERSE LENGTH=1146                                                                                                                                                          |
| ATSG44970 | AUCAUCUCGGGAUCAAACCCU    | 222  | 4 Cleavage      | [ Symbols:   Protein with RN1-like/FBD-like domains   chr5:18155837-18157340 FORWARD LENGTH=1170                                                                                                                                                         |
| ATSG45100 | UAUAGGGGCUAAGAAAGAAAGUC  | 935  | 4 Translation   | [ Symbols: SBP (S-ribonuclease binding protein) family protein   chr5:18218699-18219960 FORWARD LENGTH=1174                                                                                                                                              |
| ATSG45180 | UUUGAAGACGUAUUGUAGACAC   | 926  | 4.5 Cleavage    | [ Symbols:   Flavine-binding monoxygenase family protein   chr5:18274179-18276586 REVERSE LENGTH=1380                                                                                                                                                    |
| ATSG45190 | UCAAACGAACUUCUUGGCCCUAGA | 152  | 4 Cleavage      | [ Symbols:   Cyclin family protein   chr5:18277620-18281875 REVERSE LENGTH=2118                                                                                                                                                                          |
| ATSG45200 | CUCAUUAUGUUCUUGUUCUCCA   | 102  | 4 Cleavage      | [ Symbols:   Disease resistance protein (TIR-NBS-LRR class) family   chr5:18283967-18290332 REVERSE LENGTH=3786                                                                                                                                          |
| ATSG45210 | UGAGUAGAUUUCUGAUCAUAUUC  | 114  | 3.5 Translation | [ Symbols:   Disease resistance protein (TIR-NBS-LRR class) family   chr5:18295521-18298434 FORWARD LENGTH=2094                                                                                                                                          |
| ATSG45230 | CAAAUCUGGACAGACUACUGCU   | 324  | 4.5 Cleavage    | [ Symbols:   Disease resistance protein (TIR-NBS-LRR class) family   chr5:18302147-18308303 REVERSE LENGTH=3696                                                                                                                                          |
| ATSG45260 | CGUCACUGGCAUUCUUGCGGAG   | 272  | 5 Translation   | [ Symbols: RRS1, ATWRKY52, SLH1   Disease resistance protein (TIR-NBS-LRR class)   chr5:18326203-18332609 FORWARD LENGTH=4321                                                                                                                            |
| ATSG45310 | UUUAAAACGAGGACUUUUUGC    | 115  | 3 Cleavage      | [ Symbols:   unknown protein; LOCATED IN: endomembrane system; EXPRESSED IN: stem, inflorescence meristem, root, leaf; EXPRESSED DURING: LP.04 four leaves visible; Has 30201 Blast hits to 17322 proteins in 780 species: Archae - 12; Bacte            |
| ATSG45370 | UUUCUGACGGACAGUAAGGAU    | 480  | 4 Cleavage      | [ Symbols:   nodulin MTN21 /EamA-like transporter family protein   chr5:18388291-18390420 FORWARD LENGTH=1224                                                                                                                                            |
| ATSG45380 | UCGACACACUGUUGAAGGACU    | 121  | 3.5 Translation | [ Symbols: ATDUR3, DUR3   solute:sodium symporters;urea transmembrane transporters   chr5:18391124-18395894 FORWARD LENGTH=2526                                                                                                                          |
| ATSG45440 | UACGAGACUUGAGCCAGGACU    | 307  | 4 Cleavage      | [ Symbols:   P-loop containing nucleoside triphosphate hydrolases superfamily protein   chr5:18412308-18413555 REVERSE LENGTH=1248                                                                                                                       |
| ATSG45520 | UCAAACACUCUGAAGCAUAG     | 143  | 4.5 Cleavage    | [ Symbols:   Leucine-rich repeat (LRR) family protein   chr5:18449509-18453012 REVERSE LENGTH=3504                                                                                                                                                       |
| ATSG45660 | CUACUCGGUACUAGGCUUACU    | 311  | 4.5 Cleavage    | [ Symbols:   unknown protein; FUNCTION5 IN: molecular_function unknown; INVOLVED IN: biological_process unknown; LOCATED IN: endomembrane system; Has 35333 Blast hits to 34131 proteins in 2444 species: Archae - 798; Bacteria - 2242                  |
| ATSG45680 | UGACGCCAAUUCUUGAAGUUU    | 154  | 3.5 Cleavage    | [ Symbols:   ATFBP13, FKBP13   FK506-binding protein 13   chr5:18530880-18532337 FORWARD LENGTH=850                                                                                                                                                      |
| ATSG46040 | UUUCUUGUGAACUUGACGGGGA   | 158  | 3.5 Cleavage    | [ Symbols:   Major facilitator superfamily protein   chr5:18671397-18673551 REVERSE LENGTH=1761                                                                                                                                                          |
| ATSG46170 | UAUGGAGUUGUAGCAUUGGUC    | 937  | 3.5 Cleavage    | [ Symbols:   F-box family protein   chr5:18714965-18716953 REVERSE LENGTH=1691                                                                                                                                                                           |
| ATSG46190 | UUGGACGAGCGUACUAAUGC     | 401  | 4 Cleavage      | [ Symbols:   RNA-binding KH domain-containing protein   chr5:18723116-18726200 REVERSE LENGTH=2414                                                                                                                                                       |
| ATSG46210 | UUGUAACAAGAACUCUUCUUC    | 107  | 3 Translation   | [ Symbols: CUL4, ATCUL4   cullin 4   chr5:18731418-18736810 REVERSE LENGTH=2687                                                                                                                                                                          |
| ATSG46270 | UCGAGUAUGCGAGGAGUUAUG    | 250  | 4 Cleavage      | [ Symbols:   Disease resistance protein (TIR-NBS-LRR class) family   chr5:18764349-18769090 REVERSE LENGTH=3904                                                                                                                                          |
| ATSG46400 | UAUUGAUUUUUGGCCUGAGGU    | 116  | 3.5 Cleavage    | [ Symbols:   AT PRP39-2, PRP39-2   Tetraatricopeptide repeat (TPR)-like superfamily protein   chr5:18820032-18824650 FORWARD LENGTH=3239                                                                                                                 |
| ATSG46450 | UUGAUCCAAGUAGCUGACUCU    | 4031 | 3.5 Translation | [ Symbols:   Disease resistance protein (TIR-NBS-LRR class) family   chr5:18835618-18839546 FORWARD LENGTH=3372                                                                                                                                          |
| ATSG46500 | UACAACUAGCAGCAUCCUGC     | 156  | 4.5 Translation | [ Symbols:   BEST Arabidopsis thaliana protein match is: disease resistance protein (TIR-NBS-LRR class) family (TAIR:ATSG46260.1); Has 1807 Blast hits to 1807 proteins in 277 species: Archae - 0; Bacteria - 0; Metazoa - 736; Fungi - 347; Plants - 3 |
| ATSG46580 | CUUGUGAGUUGUUGAAGGUC     | 103  | 3.5 Translation | [ Symbols:   pentatricopeptide (PPR) repeat-containing protein   chr5:18897445-18899645 REVERSE LENGTH=2201                                                                                                                                              |
| ATSG46620 | UGGCAGUAGGAGUACACGACU    | 163  | 4.5 Cleavage    | [ Symbols:   unknown protein; BEST Arabidopsis thaliana protein match is: unknown protein (TAIR:AT4G17960.1); Has 1807 Blast hits to 1807 proteins in 277 species: Archae - 0; Bacteria - 0; Metazoa - 736; Fungi - 347; Plants - 385; Viruses - 0; O    |
| ATSG46680 | UGGCAGUAGGAGUACACGACU    | 163  | 4 Cleavage      | [ Symbols:   Pentatricopeptide repeat (PPR-like) superfamily protein   chr5:18940969-18942602 FORWARD LENGTH=1634                                                                                                                                        |
| ATSG46760 | UCCCAACCAUAGUACUAGCG     | 236  | 2.5 Translation | [ Symbols:   Basic helix-loop-helix (bHLH) DNA-binding family protein   chr5:18974231-18976009 FORWARD LENGTH=1779                                                                                                                                       |
| ATSG47010 | UACCGGAGGACUACAGCAUC     | 153  | 4 Cleavage      | [ Symbols: UPF1, LBA1, ATUPF1   RNA helicase, putative   chr5:19072009-19079334 FORWARD LENGTH=4243                                                                                                                                                      |
| ATSG47230 | UUUGUACCGAGGAGUAGGGAU    | 816  | 3.5 Cleavage    | [ Symbols: ERFS, ATERF-5, ATERF5   ethylene responsive element binding factor 5   chr5:19179939-19181129 FORWARD LENGTH=1191                                                                                                                             |
| ATSG47280 | UUUGAACUACUAGGUACCUACU   | 227  | 5 Cleavage      | [ Symbols:   ADRI1-L3   ADRI1-like 3   chr5:19193157-19195559 FORWARD LENGTH=1872                                                                                                                                                                        |
| ATSG47380 | UGUUGAUUCAAGUUGCUGACU    | 608  | 3 Cleavage      | [ Symbols:   Protein of unknown function, DUF547   chr5:19222142-19224591 REVERSE LENGTH=1977                                                                                                                                                            |
| ATSG47400 | UUGACGACCAACUCCUCCUUCU   | 170  | 4 Cleavage      | [ Symbols:   unknown protein; FUNCTION5 IN: molecular_function unknown; LOCATED IN: endomembrane system; EXPRESSED IN: 23 plant structures; EXPRESSED DURING: 13 growth stages; Has 1807 Blast hits to 1807 proteins in 277 species: Ai                  |
| ATSG47420 | UGCAUUAUUGGAGUUAUCCU     | 413  | 3.5 Cleavage    | [ Symbols:   Tryptophan RNA-binding attenuator protein-like   chr5:19232836-19235059 FORWARD LENGTH=1247                                                                                                                                                 |
| ATSG47455 | UGAAUAGCAACUUGCAAGACU    | 583  | 4 Cleavage      | [ Symbols:   unknown protein; FUNCTION5 IN: molecular_function unknown; INVOLVED IN: biological_process unknown; LOCATED IN: chloroplast; EXPRESSED IN: 13 plant structures; EXPRESSED DURING: 8 growth stages; BEST Arabidopsis thalia                  |
| ATSG47490 | UUUGUAGUCAAGUUGCUGACU    | 608  | 3.5 Translation | [ Symbols:   RGRP-related   chr5:19264675-19270800 FORWARD LENGTH=4399                                                                                                                                                                                   |
| ATSG47590 | UGUGACACCGAUUCUGAUGGC    | 115  | 4 Cleavage      | [ Symbols:   Heat shock protein HSP20/alpha crystallin family   chr5:1927817-19299152 REVERSE LENGTH=976                                                                                                                                                 |
| ATSG47670 | UAUCUUCACGGSUUUCUGAUGCC  | 826  | 4.5 Translation | [ Symbols: NYB-YB6, L1L   nuclear factor Y, subunit B6   chr5:19315023-19316169 FORWARD LENGTH=937                                                                                                                                                       |
| ATSG47720 | UGACCCACACUUGCAUGAUAGU   | 174  | 4 Translation   | [ Symbols:   Thiolase family protein   chr5:19331657-19334427 FORWARD LENGTH=1782                                                                                                                                                                        |
| ATSG47830 | UAUGGCGUGGGAGCAUACGCA    | 299  | 4.5 Cleavage    | [ Symbols:   unknown protein; Has 35333 Blast hits to 34131 proteins in 2444 species: Archae - 798; Bacteria - 22429; Metazoa - 974; Fungi - 991; Plants - 531; Viruses - 0; Other Eukaryotes - 9610 (source: NCBI BLink).   chr5:19372898-19374331      |
| ATSG47940 | UUUUAAUUAACAAGUUGCUGACU  | 133  | 3 Cleavage      | [ Symbols:   unknown protein; Has 1807 Blast hits to 1807 proteins in 277 species: Archae - 0; Bacteria - 0; Metazoa - 736; Fungi - 347; Plants - 385; Viruses - 0; Other Eukaryotes - 339 (source: NCBI BLink).   chr5:19409422-19411893 REVERSE LEI    |
| ATSG48040 | UACAGAAUAGGCUUAUGUAUAC   | 189  | 3.5 Translation | [ Symbols:   Ubiquitin carboxyl-terminal hydrolase family protein   chr5:19470139-19472445 FORWARD LENGTH=2134                                                                                                                                           |
| ATSG48100 | UGAAGGACAAGCUACGUCUGCU   | 1483 | 3.5 Cleavage    | [ Symbols: TT10, LAC15, ATLAC15   Laccase/Diphenol oxidase family protein   chr5:19489327-19492744 REVERSE LENGTH=2063                                                                                                                                   |
| ATSG48330 | UGAAGGACAAGAACAGCUGUCU   | 415  | 4 Cleavage      | [ Symbols:   Protein of chromosome condensation (RCC1) family protein   chr5:19585936-19587841 FORWARD LENGTH=1530                                                                                                                                       |
| ATSG48412 | ACAAAACUGUUGAACAAGCCU    | 1107 | 2.5 Translation | [ Symbols:     chr5:19623516-19624232 REVERSE LENGTH=717                                                                                                                                                                                                 |
| ATSG48450 | UAUCGAGCAACUACGCUACUUC   | 142  | 4 Translation   | [ Symbols: sks3   SKUS similar 3   chr5:19632791-19635664 REVERSE LENGTH=1918                                                                                                                                                                            |
| ATSG48520 | CUCAUGUAGUUCUAGUUGCGCA   | 102  | 3.5 Translation | [ Symbols:   unknown protein; Has 609 Blast hits to 593 proteins in 129 species: Archae - 0; Bacteria - 41; Metazoa - 390; Fungi - 40; Plants - 64; Viruses - 0; Other Eukaryotes - 9610 (source: NCBI BLink).   chr5:19661213-19666436 FORWARD LENG     |
| ATSG48550 | UAUACCCGACUCCUCCUUAUAG   | 267  | 5 Translation   | [ Symbols:   F-box associated ubiquitination effector family protein   chr5:19678917-19680560 FORWARD LENGTH=1284                                                                                                                                        |
| ATSG48600 | CUACGGCUCAUACUCCAGCGUC   | 968  | 2.5 Translation | [ Symbols:   ATSMC3, ATCAP-C, ATSMC4, SMC3   structural maintenance of chromosome 2   chr5:19701877-19709130 FORWARD LENGTH=3796                                                                                                                         |
| ATSG48730 | UAUCUACGACACUUCUAGGGA    | 183  | 4 Cleavage      | [ Symbols:   Pentatricopeptide repeat (PPR) superfamily protein   chr5:19763152-19765272 FORWARD LENGTH=1663                                                                                                                                             |
| ATSG48775 | AUUGGAUUUAUACUAGUUGGUC   | 196  | 3.5 Cleavage    | [ Symbols:   other RNA   chr5:19774170-19776460 FORWARD LENGTH=2060                                                                                                                                                                                      |
| ATSG48980 | UGGCAGUAGGAGUACACGACU    | 163  | 4 Translation   | [ Symbols:   Galactose oxidase/keich repeat superfamily protein   chr5:19860708-19862018 FORWARD LENGTH=1311                                                                                                                                             |
| ATSG48990 | UACAGAAUAGGCUUAAGUAUAC   | 189  | 4 Cleavage      | [ Symbols:   Galactose oxidase/keich repeat superfamily protein   chr5:19862289-19863625 FORWARD LENGTH=1337                                                                                                                                             |

|           |                         |      |     |             |                                                                                                                                                                                                                                                         |
|-----------|-------------------------|------|-----|-------------|---------------------------------------------------------------------------------------------------------------------------------------------------------------------------------------------------------------------------------------------------------|
| ATSG49030 | UUCGGUUCGGCCAUACUCGGC   | 147  | 4   | Translation | [ Symbols: OVA2   tRNA synthetase class I (I, L, M and V) family protein   chr5:19876166-19882462 REVERSE LENGTH=3238                                                                                                                                   |
| ATSG49070 | UGGAUUCCGGCUGCAUAUCUC   | 392  | 5   | Cleavage    | [ Symbols: KCS21   3-ketoacyl-CoA synthase 21   chr5:19888751-19890145 REVERSE LENGTH=1262                                                                                                                                                              |
| ATSG49140 | UUCAGGGUGAAGAACUAUGACU  | 1291 | 2   | Cleavage    | [ Symbols: I Disease resistance protein (TIR-NBS-LRR class) family   chr5:19919085-19923415 REVERSE LENGTH=2943                                                                                                                                         |
| ATSG49152 | UUGAAGGAUUUGUGGUUAACCA  | 106  | 2.5 | Cleavage    | [ Symbols: I other RNA   chr5:19928880-19929377 FORWARD LENGTH=324                                                                                                                                                                                      |
| ATSG49190 | UCUCAAUGAUGUUAUGUUGCA   | 1437 | 3.5 | Cleavage    | [ Symbols: SUS2, SSA, ATUS2   sucrose synthase 2   chr5:19943282-19947189 REVERSE LENGTH=2511                                                                                                                                                           |
| ATSG49300 | UGUACCCGUAUGAUUUUUUUU   | 123  | 4.5 | Translation | [ Symbols: GATA16   GATA transcription factor 16   chr5:19984849-19985697 REVERSE LENGTH=642                                                                                                                                                            |
| ATSG49410 | UGUUAGAGACUUAAGCCACGAG  | 574  | 3.5 | Translation | [ Symbols: I unknown protein; BEST Arabidopsis thaliana protein match is: unknown protein (TAIR:AT3G73940.1); Has 1807 Blast hits to 1807 proteins in 277 species: Archae - 0; Bacteria - 0; Metazoa - 736; Fungi - 347; Plants - 385; Viruses - 0; OI  |
| ATSG49448 | CGAGAGUAUAGCGGACUAGUUC  | 3198 | 4   | Cleavage    | [ Symbols: CPURF1   conserved peptide upstream open reading frame 14   chr5:20051829-20052735 FORWARD LENGTH=907                                                                                                                                        |
| ATSG49450 | CGAGAGUAUAGCGGACUAGUUC  | 3198 | 4   | Cleavage    | [ Symbols: AtbZIP1, bZIP1   basic leucine zipper 1   chr5:20051829-20052735 FORWARD LENGTH=907                                                                                                                                                          |
| ATSG49470 | AUUGAUUUUCGACUAACGGCC   | 128  | 4.5 | Cleavage    | [ Symbols: I PAS domain-containing protein tyrosine kinase family protein   chr5:20063448-20068665 FORWARD LENGTH=2757                                                                                                                                  |
| ATSG49490 | UUUUUAAUUCAAGUAGCUGACU  | 133  | 3   | Translation | [ Symbols: AGL83   AGAMOUS-like 83   chr5:20075328-20076185 FORWARD LENGTH=858                                                                                                                                                                          |
| ATSG49540 | CUCAACAAGUGUAUUAUGGCUU  | 208  | 5   | Cleavage    | [ Symbols: I Rab5-interacting family protein   chr5:20104481-20106122 REVERSE LENGTH=822                                                                                                                                                                |
| ATSG49610 | UGAGCCGACAAAGAGUAGUUAUC | 111  | 3.5 | Cleavage    | [ Symbols: I F-box family protein   chr5:20131274-20132729 REVERSE LENGTH=1456                                                                                                                                                                          |
| ATSG49650 | UACCCGUAUGCUGCUUAUAAG   | 185  | 5   | Translation | [ Symbols: XK-2, XK2   xylose kinase-2   chr5:20152781-20155768 FORWARD LENGTH=1983                                                                                                                                                                     |
| ATSG49665 | UGAAUGACAACUUGGACGAAGCU | 583  | 4   | Cleavage    | [ Symbols: I Zinc finger (C3HC4-type RING finger) family protein   chr5:20167002-20169474 REVERSE LENGTH=2394                                                                                                                                           |
| ATSG49680 | UCAAAGCGUAUGGAGGAUUGUU  | 102  | 4   | Cleavage    | [ Symbols: I Golgi-body localisation protein domain; RNA pol II promoter Fmp27 protein domain   chr5:20176385-20188307 FORWARD LENGTH=7764                                                                                                              |
| ATSG49720 | UUGAUCCAAGUAGGACGACUCU  | 4031 | 4.5 | Cleavage    | [ Symbols: ATGH9A1, TSD1, DEC, KOR, RSW2, IRX2, KOR1, GH9A1   glycosyl hydrolase 9A1   chr5:20197391-20200288 REVERSE LENGTH=2360                                                                                                                       |
| ATSG49890 | UUGAGAGCACUCCACCGACUG   | 261  | 5   | Cleavage    | [ Symbols: CLC-C, ATCLC-C   chloride channel C   chr5:20288119-20292350 REVERSE LENGTH=2836                                                                                                                                                             |
| ATSG50010 | UCGACACACUGUUGAGGAUCU   | 121  | 4.5 | Cleavage    | [ Symbols: I sequence-specific DNA binding transcription factors; transcription regulators   chr5:20348615-20350830 FORWARD LENGTH=1858                                                                                                                 |
| ATSG50011 | UCGACACACUGUUGAGGAUCU   | 121  | 4.5 | Cleavage    | [ Symbols: CPURF37   conserved peptide upstream open reading frame 37   chr5:20348615-20350830 FORWARD LENGTH=1858                                                                                                                                      |
| ATSG50012 | UCGACACACUGUUGAGGAUCU   | 121  | 4.5 | Cleavage    | [ Symbols: CPURF36   conserved peptide upstream open reading frame 36   chr5:20348615-20350830 FORWARD LENGTH=1858                                                                                                                                      |
| ATSG50335 | UUGGAGAGACUUAUGACCCAGAG | 515  | 3.5 | Cleavage    | [ Symbols: I unknown protein; Has 30201 Blast hits to 17322 proteins in 780 species: Archae - 12; Bacteria - 1396; Metazoa - 17338; Fungi - 3422; Plants - 5037; Viruses - 0; Other Eukaryotes - 2996 (source: NCBI BLink).   chr5:20489094-2048972     |
| ATSG50350 | UUUGGCGGUUUCUUAUUAAGU   | 300  | 4   | Cleavage    | [ Symbols: I unknown protein; FUNCTIONS IN: molecular_function unknown; INVOLVED IN: response to oxidative stress; LOCATED IN: chloroplast; EXPRESSED IN: 22 plant structures; EXPRESSED DURING: 13 growth stages; Has 1807 Blast hits to :             |
| ATSG50375 | UCCUUAUUGAAGGAAGAACGCG  | 272  | 3.5 | Translation | [ Symbols: CPI1   cyclopropyl isomerase 1   chr5:20511667-20514249 FORWARD LENGTH=1212                                                                                                                                                                  |
| ATSG50390 | UCGAGUAUUGAGCCUGAGUAUG  | 250  | 4.5 | Cleavage    | [ Symbols: I Pentatricopeptide repeat (PPR-like) superfamily protein   chr5:20520789-20522980 REVERSE LENGTH=2106                                                                                                                                       |
| ATSG50520 | UGCCUGAUUUGCUUCUACUCGA  | 125  | 5   | Cleavage    | [ Symbols: I Major facilitator superfamily protein   chr5:20569563-20571615 REVERSE LENGTH=1768                                                                                                                                                         |
| ATSG50590 | UAGAGUAUUAAGUUGGGACAGGA | 199  | 4.5 | Cleavage    | [ Symbols: AHSMD4, HSD4   hydroxysteroid dehydrogenase 4   chr5:20587988-20589296 FORWARD LENGTH=900                                                                                                                                                    |
| ATSG50630 | UGCCUGAUUUGCUUCUACUCGA  | 125  | 5   | Cleavage    | [ Symbols: I Major facilitator superfamily protein   chr5:20602921-20604956 REVERSE LENGTH=1751                                                                                                                                                         |
| ATSG50690 | UAGAGUAUUAAGUUGGGACAGGA | 199  | 4.5 | Cleavage    | [ Symbols: AHS07, HSD7   hydroxysteroid dehydrogenase 7   chr5:20621330-20622638 FORWARD LENGTH=900                                                                                                                                                     |
| ATSG50840 | UAGAUAACGAAGACUCUUCUUC  | 107  | 4   | Cleavage    | [ Symbols: I CONTAINS InterPro DOMAIN/s: Taxilin (InterPro:IPR019132); Has 30201 Blast hits to 17322 proteins in 780 species: Archae - 12; Bacteria - 1396; Metazoa - 17338; Fungi - 3422; Plants - 5037; Viruses - 0; Other Eukaryotes - 2996 (sour    |
| ATSG50940 | UAGCGGACGAAGUAUUAAGCUG  | 259  | 4   | Translation | [ Symbols: I RNA-binding KH domain-containing protein   chr5:20724578-20726479 FORWARD LENGTH=1101                                                                                                                                                      |
| ATSG51040 | UGGCAGCGAAUUUGAUGAUCU   | 178  | 3.5 | Translation | [ Symbols: I unknown protein; FUNCTIONS IN: molecular_function unknown; INVOLVED IN: biological_process unknown; LOCATED IN: cellular_component unknown; EXPRESSED IN: 24 plant structures; EXPRESSED DURING: 15 growth stages; COI                     |
| ATSG51120 | UUGUGAGUGUUUGAUGAUGGCU  | 103  | 3.5 | Translation | [ Symbols: PABN1   polyadenylate-binding protein 1   chr5:20779327-20781530 FORWARD LENGTH=737                                                                                                                                                          |
| ATSG51180 | UUUUGCGUUGGAACUCGAGUA   | 114  | 4   | Cleavage    | [ Symbols: I alpha/beta-Hydrolases superfamily protein   chr5:20797017-20800214 FORWARD LENGTH=1586                                                                                                                                                     |
| ATSG51190 | UACACUCACUUGAUUUAAGGAG  | 223  | 4   | Translation | [ Symbols: I Integrase-type DNA-binding superfamily protein   chr5:20800584-20801416 REVERSE LENGTH=833                                                                                                                                                 |
| ATSG51195 | CCUAGGCGUAGUGACCGAGUA   | 270  | 4   | Cleavage    | [ Symbols: I unknown protein; BEST Arabidopsis thaliana protein match is: unknown protein (TAIR:AT3G47920.1); Has 30201 Blast hits to 17322 proteins in 780 species: Archae - 12; Bacteria - 1396; Metazoa - 17338; Fungi - 3422; Plants - 5037; v      |
| ATSG51370 | AAACAGGACCAAGUUAUCGCGC  | 986  | 4   | Cleavage    | [ Symbols: I RNI-like superfamily protein   chr5:20872762-20874284 FORWARD LENGTH=1523                                                                                                                                                                  |
| ATSG51430 | UUUCUAGCGGACAAAGUAUAGCU | 313  | 4.5 | Cleavage    | [ Symbols: EYE   conserved oligomeric Golgi complex component-related / COG complex component-related   chr5:20886838-20890907 REVERSE LENGTH=2829                                                                                                      |
| ATSG51540 | UUUGGCAACGUAUUCUUGAAGG  | 138  | 2.5 | Translation | [ Symbols: I Zincin-like metalloproteases family protein   chr5:20932031-20936413 FORWARD LENGTH=2290                                                                                                                                                   |
| ATSG51660 | UCCUGAGUAUCUUCUUCUACAG  | 209  | 3.5 | Translation | [ Symbols: CPSF160, ATCPSF160   cleavage and polyadenylation specificity factor 160   chr5:20980215-20980427 FORWARD LENGTH=4523                                                                                                                        |
| ATSG51690 | UUGGACAGAAAUUCACACCGA   | 113  | 3   | Cleavage    | [ Symbols: ACS12   1-amino-cyclopropane-1-carboxylate synthase 12   chr5:20997413-21001046 REVERSE LENGTH=3179                                                                                                                                          |
| ATSG51730 | UCGCCUGAGGUUGGACGCCUUC  | 147  | 5   | Cleavage    | [ Symbols: I RNA-binding (RRM/RBD/RNP motifs) family protein   chr5:21011418-21013657 FORWARD LENGTH=1246                                                                                                                                               |
| ATSG51800 | CGAUUUCUGAUUUGCAUGUGGU  | 186  | 4.5 | Cleavage    | [ Symbols: I Protein kinase superfamily protein   chr5:21048191-21052012 FORWARD LENGTH=3151                                                                                                                                                            |
| ATSG51820 | CUUGGCAUGCAAUUUGAAGUACU | 1059 | 4   | Cleavage    | [ Symbols: PGM, ATPGMP, PGM1, STF1   phosphoglucomutase   chr5:21063368-21068057 REVERSE LENGTH=2159                                                                                                                                                    |
| ATSG51830 | UAACAAGAACUUCUUCUUAUUCU | 235  | 3.5 | Cleavage    | [ Symbols: I pfrB-like carbohydrate kinase family protein   chr5:21069572-21071735 FORWARD LENGTH=1454                                                                                                                                                  |
| ATSG51850 | CAUUGACUUAUACGCGUGCCUC  | 190  | 5   | Cleavage    | [ Symbols: I unknown protein; BEST Arabidopsis thaliana protein match is: unknown protein (TAIR:ATSG62170.1); Has 384 Blast hits to 375 proteins in 79 species: Archae - 0; Bacteria - 14; Metazoa - 135; Fungi - 31; Plants - 92; Viruses - 0; Other I |
| ATSG51920 | UUUAUACAGAACUUCUGGCCUC  | 310  | 3.5 | Cleavage    | [ Symbols: I Pyridoxal phosphate (PLP)-dependent transferases superfamily protein   chr5:21097106-21098959 REVERSE LENGTH=1854                                                                                                                          |
| ATSG51980 | UUUGCCUGUUGAAGUCGAGUA   | 114  | 4.5 | Translation | [ Symbols: I Transducin/WD40 repeat-like superfamily protein   chr5:21113650-21116197 REVERSE LENGTH=1512                                                                                                                                               |
| ATSG52210 | UUUGCUGAACAUUAUCUCCUA   | 119  | 2   | Cleavage    | [ Symbols: ATARL81, ATGB1, GB1   GTP-binding protein 1   chr5:21204991-21207097 FORWARD LENGTH=992                                                                                                                                                      |
| ATSG52270 | UUGAAACAGCCUGAUGAAGUUG  | 102  | 5   | Cleavage    | [ Symbols: I SNARE-like superfamily protein   chr5:21221643-21222600 REVERSE LENGTH=645                                                                                                                                                                 |
| ATSG52430 | UAAACAGCAACUUGGCUUAGA   | 302  | 3   | Cleavage    | [ Symbols: I hydroxyproline-rich glycoprotein family protein   chr5:21282750-21285271 REVERSE LENGTH=1886                                                                                                                                               |
| ATSG52547 | UAACCGGGGCAUGAGAGACUUC  | 100  | 3.5 | Cleavage    | [ Symbols: I FUNCTIONS IN: molecular_function unknown; INVOLVED IN: biological_process unknown; LOCATED IN: cellular_component unknown; BEST Arabidopsis thaliana protein match is: DNA binding (TAIR:AT3G47680.1); Has 61 Blast hits to                |
| ATSG52550 | UCCCGGAUUGCGAAGAAAGUA   | 113  | 3.5 | Cleavage    | [ Symbols: I unknown protein; BEST Arabidopsis thaliana protein match is: unknown protein (TAIR:AT4G25670.2); Has 30201 Blast hits to 17322 proteins in 780 species: Archae - 12; Bacteria - 1396; Metazoa - 17338; Fungi - 3422; Plants - 5037; v      |
| ATSG52552 | UCCCGGAUUGCGAAGAAAGUA   | 113  | 3.5 | Cleavage    | [ Symbols: CPURF14   conserved peptide upstream open reading frame 14   chr5:21327712-21330136 REVERSE LENGTH=1739                                                                                                                                      |
| ATSG52580 | UAACGACACCGGUGUUGCGGCC  | 119  | 5   | Cleavage    | [ Symbols: I RABGAP/TBC domain-containing protein   chr5:21337861-21342555 FORWARD LENGTH=2401                                                                                                                                                          |
| ATSG52950 | UUUGGCGCUUAACUUCUGCAAGG | 2546 | 4.5 | Cleavage    | [ Symbols: I unknown protein; Has 30201 Blast hits to 17322 proteins in 780 species: Archae - 12; Bacteria - 1396; Metazoa - 17338; Fungi - 3422; Plants - 5037; Viruses - 0; Other Eukaryotes - 2996 (source: NCBI BLink).   chr5:21473887-2147693     |
| ATSG53160 | UGGAGGAUGAUGAUUUAUUGCC  | 126  | 3   | Cleavage    | [ Symbols: RCAR3, PYL8   regulatory components of ABA receptor 3   chr5:21560718-21562260 FORWARD LENGTH=1182                                                                                                                                           |
| ATSG53320 | UUCUCCUUGUGUUGCGCCAC    | 196  | 3.5 | Translation | [ Symbols: I Leucine-rich repeat protein kinase family protein   chr5:21636241-21638398 REVERSE LENGTH=2079                                                                                                                                             |
| ATSG53430 | UGAAGGACAGGUCACGUCUGU   | 1483 | 4.5 | Cleavage    | [ Symbols: SDG29, SET29, ATX5   SET domain group 29   chr5:21677146-21683494 FORWARD LENGTH=3937                                                                                                                                                        |
| ATSG53570 | UGGAGAUAGAUAGUAUUGCGC   | 126  | 3.5 | Cleavage    | [ Symbols: I Ypt/Rab-GAP domain of gyp1p superfamily protein   chr5:21760590-21763462 REVERSE LENGTH=2250                                                                                                                                               |
| ATSG53750 | UGAAUAAACUGAAGCAACGCC   | 263  | 2.5 | Cleavage    | [ Symbols: I CBS domain-containing protein   chr5:21817366-21818843 FORWARD LENGTH=1397                                                                                                                                                                 |
| ATSG53760 | AAACAGGACAAUGUACUCGCC   | 986  | 4   | Cleavage    | [ Symbols: MLO11, ATML011   Seven transmembrane MLO family protein   chr5:21822534-21826451 FORWARD LENGTH=2224                                                                                                                                         |
| ATSG53910 | UUUGUUAACUUAUGUGUACCC   | 165  | 3.5 | Translation | [ Symbols: I RING/U-box superfamily protein   chr5:21890643-21891335 FORWARD LENGTH=693                                                                                                                                                                 |
| ATSG54260 | CUUGGACUGAGGUAAGCGCCUC  | 234  | 4.5 | Cleavage    | [ Symbols: MRE11, ATMRE11   DNA repair and meiosis protein (Mre11)   chr5:22032609-22037991 FORWARD LENGTH=2574                                                                                                                                         |
| ATSG54380 | UUGAAACAGCCUGAUGAAGUUG  | 102  | 2   | Translation | [ Symbols: THE1   protein kinase family protein   chr5:22077092-22079880 REVERSE LENGTH=2789                                                                                                                                                            |
| ATSG54490 | UCGAGACCAUCGUCUACUGCG   | 100  | 4   | Translation | [ Symbols: PBP1   pinoid-binding protein 1   chr5:22121404-22121931 FORWARD LENGTH=528                                                                                                                                                                  |
| ATSG54540 | UUGAGAGAUAACUUAUGCGGU   | 731  | 3.5 | Translation | [ Symbols: I Uncharacterised conserved protein (UCP012943)   chr5:22156498-22158054 FORWARD LENGTH=1197                                                                                                                                                 |
| ATSG54630 | UUUAUGGACUCUAGCCACGAGU  | 149  | 4.5 | Cleavage    | [ Symbols: I zinc finger protein-related   chr5:22192499-22194308 REVERSE LENGTH=1575                                                                                                                                                                   |
| ATSG54670 | UUUGUGUGAACUUGACCCGGGA  | 158  | 3   | Cleavage    | [ Symbols: ATK3, KATC   kinesin 3   chr5:22209472-22214134 FORWARD LENGTH=2835                                                                                                                                                                          |
| ATSG54690 | UGAAGGAGGUCACGUCUGUUC   | 1483 | 5   | Cleavage    | [ Symbols: GAUT12, LGT6, IRX8   galacturonoyltransferase 12   chr5:22219224-22221840 REVERSE LENGTH=1890                                                                                                                                                |
| ATSG54840 | UAUCGACACACUUGUUAUGAGA  | 183  | 3.5 | Translation | [ Symbols: ATSGP1, SGP1   Ras-related small GTP-binding family protein   chr5:22276513-22278423 REVERSE LENGTH=1060                                                                                                                                     |
| ATSG54860 | CACUAUACACAGGGGCAUCU    | 198  | 3   | Cleavage    | [ Symbols: I Major facilitator superfamily protein   chr5:22284581-22287206 FORWARD LENGTH=1797                                                                                                                                                         |
| ATSG54870 | UUUACGAGACUUAAGCCAGCU   | 373  | 3.5 | Cleavage    | [ Symbols: I unknown protein; FUNCTIONS IN: molecular_function unknown; INVOLVED IN: biological_process unknown; LOCATED IN: vacuole; EXPRESSED IN: 24 plant structures; EXPRESSED DURING: 15 growth stages; BEST Arabidopsis thaliana                  |
| ATSG54930 | UUUUUGUUAUGAUGUAAGAAUUC | 1799 | 3.5 | Cleavage    | [ Symbols: I unknown protein; Has 1807 Blast hits to 17322 proteins in 777 species: Archae - 0; Bacteria - 0; Metazoa - 736; Fungi - 347; Plants - 385; Viruses - 0; Other Eukaryotes - 339 (source: NCBI BLink).   chr5:22465489-22465218 FORWARD L    |
| ATSG55550 | CUUGGCAUGCAAUUUGAUCUUC  | 1059 | 4.5 | Cleavage    | [ Symbols: I RNA-binding (RRM/RBD/RNP motifs) family protein   chr5:22501535-22504011 REVERSE LENGTH=2075                                                                                                                                               |
| ATSG55600 | UAGUGACCGGAGUAGGACACCC  | 461  | 3.5 | Cleavage    | [ Symbols: I agenet domain-containing protein / bromo-adjacent homology (BAH) domain-containing protein   chr5:22521849-22525645 REVERSE LENGTH=3224                                                                                                    |
| ATSG55720 | UAGAGAUUUUUGAUUACCGGGA  | 285  | 4   | Cleavage    | [ Symbols: I Pectin lyase-like superfamily protein   chr5:22556047-22557725 FORWARD LENGTH=1408                                                                                                                                                         |
| ATSG55800 | UGAAUGACAACUUGGACGAAGCU | 583  | 5   | Cleavage    | [ Symbols: I Cysteine/Histidine-rich C1 domain family protein   chr5:22581694-22583430 FORWARD LENGTH=1737                                                                                                                                              |
| ATSG55860 | UACCGGAGGACGUCUACUAGCU  | 401  | 4.5 | Translation | [ Symbols: I Plant protein of unknown function (DUF827)   chr5:22609532-22612393 FORWARD LENGTH=2469                                                                                                                                                    |
| ATSG55950 | GCAAUGGAUUAUAAAAGACAC   | 100  | 3.5 | Cleavage    | [ Symbols: I Nucleotide/sugar transporter family protein   chr5:22658112-22660434 REVERSE LENGTH=1677                                                                                                                                                   |
| ATSG55960 | UUUAUCCAAGUAGCUGACUCU   | 2805 | 3   | Cleavage    | [ Symbols: I unknown protein; CONTAINS InterPro DOMAIN/s: Uncharacterised protein family UPF0118 (InterPro:IPR02549); Has 30201 Blast hits to 17322 proteins in 780 species: Archae - 12; Bacteria - 1396; Metazoa - 17338; Fungi - 3422; Pla           |
| ATSG55970 | UCUUAUUGUUGGAACUUAUACC  | 138  | 4   | Cleavage    | [ Symbols: I RING/U-box superfamily protein   chr5:22667906-22669545 FORWARD LENGTH=1378                                                                                                                                                                |
| ATSG56000 | UUCGGUUCGGCCAUACUCGGC   | 147  | 4   | Cleavage    | [ Symbols: Hsp81.3, AThsp90.4   HEAT SHOCK PROTEIN 81.4   chr5:22677451-22680152 REVERSE LENGTH=2336                                                                                                                                                    |
| ATSG56010 | CUCAACAAGUUAUUAUGGCUU   | 208  | 4.5 | Cleavage    | [ Symbols: Hsp81.3, AThsp90.3, AThsp90.3   heat shock protein 81-3   chr5:22681305-22684129 FORWARD LENGTH=2423                                                                                                                                         |
| ATSG56110 | UUGAAAGACUUGUGGAUACACC  | 926  | 4.5 | Cleavage    | [ Symbols: ATMYB103, ATMYB80, MYB103, MS188   myb domain protein 103   chr5:22719191-22720664 FORWARD LENGTH=963                                                                                                                                        |
| ATSG56160 | UCUUGUUGGCUUUCUUCUAGAC  | 300  | 3.5 | Translation | [ Symbols: I Sec14p-like phosphatidylinositol transfer family protein   chr5:22731974-22735590 FORWARD LENGTH=2191                                                                                                                                      |
| ATSG56200 | UACGGGACCAUUAAGCUGUUC   | 200  | 4.5 | Translation | [ Symbols: I CH2 type zinc finger transcription factor family   chr5:22747768-22749249 FORWARD LENGTH=1482                                                                                                                                              |
| ATSG56290 | UUUGAGCACUCUUGACCCGGA   | 154  | 4   | Cleavage    | [ Symbols: PEX5, ATPEX5   peroxin 5   chr5:22786506-22792161 FORWARD LENGTH=2525                                                                                                                                                                        |
| ATSG56510 | AUUUAUUCUGACACAAGGGC    | 128  | 4   | Cleavage    | [ Symbols: APUM12, PUM12   pumilio 12   chr5:22881721-22883842 FORWARD LENGTH=1791                                                                                                                                                                      |

|           |                         |      |     |             |                                                                                                                                                                                                                                                        |
|-----------|-------------------------|------|-----|-------------|--------------------------------------------------------------------------------------------------------------------------------------------------------------------------------------------------------------------------------------------------------|
| AT5G56610 | UUCCCCUAGAAUUUCUUCUCCU  | 1646 | 4.5 | Cleavage    | [ Symbols:   Phosphotyrosine protein phosphatases superfamily protein   chr5:22916731-22918338 FORWARD LENGTH=772                                                                                                                                      |
| AT5G56620 | UGACACCGAUUCUAGUUGCAU   | 377  | 3.5 | Cleavage    | [ Symbols: anac099, NAC099   NAC domain containing protein 99   chr5:22918521-22921139 REVERSE LENGTH=1161                                                                                                                                             |
| AT5G56630 | UUUUUGCGACUAGAUGAGCAU   | 107  | 3   | Cleavage    | [ Symbols: PFK7   phosphofructokinase 7   chr5:22923922-22926963 FORWARD LENGTH=2082                                                                                                                                                                   |
| AT5G56800 | UGAAGGACAAGCUACGUCUGU   | 1483 | 4   | Cleavage    | [ Symbols:   Protein with RNl-like/FBD-like domains   chr5:22927989-22974308 FORWARD LENGTH=1135                                                                                                                                                       |
| AT5G56870 | UUUGGGUUUGGGUUAACUGCU   | 225  | 3.5 | Cleavage    | [ Symbols: BGAL4   beta-galactosidase 4   chr5:23004196-23008649 FORWARD LENGTH=2502                                                                                                                                                                   |
| AT5G56970 | UUUGAAGACUCCACCGACU     | 261  | 4.5 | Translation | [ Symbols: CXX3, ATCKX3   cytokinin oxidase 3   chr5:23044944-23048268 REVERSE LENGTH=1595                                                                                                                                                             |
| AT5G57030 | UUAAUCAGUAGUCUGACUCU    | 2805 | 5   | Translation | [ Symbols: LUT2   Lycopene beta/epsilon cyclase protein   chr5:2307265-23080053 FORWARD LENGTH=1943                                                                                                                                                    |
| AT5G57120 | UUAUCUUGUAGUCUUCUGCU    | 210  | 3.5 | Cleavage    | [ Symbols:   FUNCTIONS IN: molecular_function unknown; INVOLVED IN: biological_process unknown; LOCATED IN: nucleolus; EXPRESSED IN: 21 plant structures; EXPRESSED DURING: 13 growth stages; CONTAINS InterPro DOMAIN/s: LisH dimer                   |
| AT5G57180 | UUUGUGUUAUUUUUGAGCU     | 108  | 3.5 | Cleavage    | [ Symbols: CIA2   chloroplast import apparatus 2   chr5:23167842-23169739 FORWARD LENGTH=1898                                                                                                                                                          |
| AT5G57210 | UGAGAUUGCUAAGAGGAAGAG   | 101  | 3.5 | Cleavage    | [ Symbols:   Yp/RAB-GAP domain of gyp1p superfamily protein   chr5:23180833-23183811 REVERSE LENGTH=2575                                                                                                                                               |
| AT5G57270 | UACUUGAGGACUGUACAACACU  | 176  | 4   | Cleavage    | [ Symbols:   Core-2/-4/-branching beta-1,6-N-acetylglucosaminyltransferase family protein   chr5:23200614-23203792 REVERSE LENGTH=1907                                                                                                                 |
| AT5G57350 | UUAGAUAUUUAUCUUGUUGGC   | 138  | 4   | Cleavage    | [ Symbols: H3A3, H3   (+)-ATPase 3   chr5:23230879-23236572 REVERSE LENGTH=3220                                                                                                                                                                        |
| AT5G57370 | UCUAGUUGCGAUUUUUUGGAC   | 421  | 3.5 | Translation | [ Symbols:   unknown protein; CONTAINS InterPro DOMAIN/s: Protein of unknown function DUF1777 [InterPro:IPR013957]; Has 30201 Blast hits to 17322 proteins in 780 species: Archae - 12; Bacteria - 1396; Metazoa - 17338; Fungi - 3422; Plant          |
| AT5G57565 | UUUGUGGAUUCGUGUAGUCUGUA | 152  | 3.5 | Cleavage    | [ Symbols:   Protein kinase superfamily protein   chr5:23310346-23311564 FORWARD LENGTH=1028                                                                                                                                                           |
| AT5G57580 | UUUAAACAUAAGGUUCCUGU    | 1055 | 4   | Translation | [ Symbols:   Calmodulin-binding protein   chr5:23314716-23318125 REVERSE LENGTH=2434                                                                                                                                                                   |
| AT5G57610 | UACUCGACCACACUUGUUAAGGA | 183  | 5   | Cleavage    | [ Symbols:   Protein kinase superfamily protein with octicosapeptide/Phox/Bem1p domain   chr5:23324791-23329347 FORWARD LENGTH=3846                                                                                                                    |
| AT5G57740 | UCGGCUGCAAAACCUAACACUGU | 129  | 4   | Translation | [ Symbols: XBAT32   XB3 ortholog 2 in Arabidopsis thaliana   chr5:23394585-23397650 REVERSE LENGTH=2236                                                                                                                                                |
| AT5G57800 | UCUAGUUGCGAUUUUUUGGAC   | 421  | 3.5 | Cleavage    | [ Symbols: FLP1, YRE, CER3, WAX2   Fatty acid hydroxylase superfamily   chr5:23420209-23424052 FORWARD LENGTH=2499                                                                                                                                     |
| AT5G57980 | ACAAACUGUUGAACAAAGCCU   | 1107 | 3.5 | Translation | [ Symbols: RPB5C   RNA polymerase II fifth largest subunit, C   chr5:23469050-23469768 REVERSE LENGTH=633                                                                                                                                              |
| AT5G58120 | UCUGUAGCUAAUACUUGGGAC   | 1212 | 5   | Cleavage    | [ Symbols:   Disease resistance protein (TIR-NBS-LRR class) family   chr5:23517492-23521067 FORWARD LENGTH=3281                                                                                                                                        |
| AT5G58170 | UCAAACACUCUGUAACAUCAUAG | 143  | 3.5 | Cleavage    | [ Symbols: SVL3   SHV3-like 5   chr5:23540049-23543345 REVERSE LENGTH=2622                                                                                                                                                                             |
| AT5G58190 | UUGGGAGAACUUAUAGACGAG   | 515  | 3.5 | Cleavage    | [ Symbols: ECTC1   evolutionarily conserved C-terminal region 10   chr5:23546329-23549605 FORWARD LENGTH=1931                                                                                                                                          |
| AT5G58210 | UACUGACUGCGAUUUCUUCUGU  | 271  | 3.5 | Cleavage    | [ Symbols:   hydroxyproline-rich glycoprotein family protein   chr5:23552094-23554402 FORWARD LENGTH=1736                                                                                                                                              |
| AT5G58240 | UACGAGGCGACUAGAGACUCU   | 100  | 4.5 | Cleavage    | [ Symbols: FHT   FRAGILE HISTIDINE TRIAD   chr5:23558814-23559201 REVERSE LENGTH=748                                                                                                                                                                   |
| AT5G58320 | UUAAGGACCAUCUAGCUCUGU   | 123  | 4   | Translation | [ Symbols:   Kinase interacting (KIP1-like) family protein   chr5:23577512-23579786 FORWARD LENGTH=1939                                                                                                                                                |
| AT5G58380 | UUAGCUGUAGGUUGGACGCCU   | 231  | 4.5 | Cleavage    | [ Symbols: CIPK10, PKS2, SIP1, SNRK3.8   SOS3-interacting protein 1   chr5:23596962-23599242 REVERSE LENGTH=1963                                                                                                                                       |
| AT5G58410 | CAAAUCGGACAAGCUACUUGCU  | 324  | 4   | Translation | [ Symbols:   HEAT/U-box domain-containing protein   chr5:23609663-23617386 FORWARD LENGTH=5665                                                                                                                                                         |
| AT5G58450 | UUUCUAGAAGCAACAGCUCAGCU | 1012 | 3.5 | Translation | [ Symbols:   Tetra tripeptide repeat (TPR)-like superfamily protein   chr5:23626826-23632223 FORWARD LENGTH=3350                                                                                                                                       |
| AT5G58500 | UAGUUGACCCGAGUAGUACACC  | 461  | 4.5 | Translation | [ Symbols: LSH5   Protein of unknown function [DUF640]   chr5:23645535-23646083 REVERSE LENGTH=549                                                                                                                                                     |
| AT5G58540 | UUUGAGGACUCCACCGACUGU   | 261  | 4   | Cleavage    | [ Symbols:   Protein kinase superfamily protein   chr5:23663136-23665316 FORWARD LENGTH=1930                                                                                                                                                           |
| AT5G58550 | UACCGGAGGACGUAUAUAGCU   | 401  | 4.5 | Cleavage    | [ Symbols: ECT2   ETO1-like 2   chr5:23665182-23668226 REVERSE LENGTH=2568                                                                                                                                                                             |
| AT5G58750 | UGAGACACAACAGGAGAGUUCU  | 244  | 4.5 | Translation | [ Symbols:   NAD(P)-binding Rossmann-fold superfamily protein   chr5:23728788-23730122 FORWARD LENGTH=1335                                                                                                                                             |
| AT5G58800 | UAGAUAACAAAGAAUCUUCUUC  | 107  | 4.5 | Cleavage    | [ Symbols:   Quinone reductase family protein   chr5:23745891-23747274 REVERSE LENGTH=900                                                                                                                                                              |
| AT5G58880 | UGCACCAACUCUGUAUGUAGCU  | 174  | 4   | Translation | [ Symbols:   unknown protein; BEST Arabidopsis thaliana protein match is: unknown protein (TAIR:AT2G29620.1); Has 1807 Blast hits to 1807 proteins in 277 species: Archae - 0; Bacteria - 0; Metazoa - 736; Fungi - 347; Plants - 385; Viruses - 0; Or |
| AT5G58920 | UCGAGGCGAGGAACUUAUGCU   | 334  | 3   | Cleavage    | [ Symbols:   unknown protein; Has 1807 Blast hits to 1807 proteins in 277 species: Archae - 0; Bacteria - 0; Metazoa - 736; Fungi - 347; Plants - 385; Viruses - 0; Other Eukaryotes - 339 (source: NCBI BLINK);   chr5:23793129-23794245 FORWARD L    |
| AT5G58930 | UUAGCAGCAACUCCGCUCCU    | 170  | 4   | Cleavage    | [ Symbols:   Protein of unknown function [DUF740]   chr5:23794315-23796461 REVERSE LENGTH=2147                                                                                                                                                         |
| AT5G58950 | AUGGUAUUAGUAUCACUUGCGUC | 196  | 4   | Cleavage    | [ Symbols:   Protein kinase superfamily protein   chr5:23800928-23803673 REVERSE LENGTH=2310                                                                                                                                                           |
| AT5G59210 | UCUAGUUGCGGUUUUUCAGAC   | 163  | 3   | Translation | [ Symbols:   myosin heavy chain-related   chr5:23890636-23893665 REVERSE LENGTH=1514                                                                                                                                                                   |
| AT5G59260 | UUUGUACAAGUUCUAGCUCU    | 4031 | 3.5 | Cleavage    | [ Symbols:   Concavallin A-like lectin protein kinase family protein   chr5:23897801-23899925 REVERSE LENGTH=2025                                                                                                                                      |
| AT5G59270 | UUUGUACAAGUUCUAGCUCU    | 4031 | 4   | Cleavage    | [ Symbols:   Concavallin A-like lectin protein kinase family protein   chr5:23911151-23913235 REVERSE LENGTH=2007                                                                                                                                      |
| AT5G59350 | UUUGUUAACUACUAGUGUACACC | 165  | 2.5 | Cleavage    | [ Symbols:   unknown protein; FUNCTIONS IN: molecular_function unknown; INVOLVED IN: biological_process unknown; LOCATED IN: endomembrane system; EXPRESSED IN: 23 plant structures; EXPRESSED DURING: 13 growth stages; Has 1807                      |
| AT5G59490 | UAGAUAUAGUUGGACGAGGA    | 199  | 3   | Cleavage    | [ Symbols:   Haloacid dehalogenase-like hydrolase (HAD) superfamily protein   chr5:23982724-23984617 REVERSE LENGTH=1089                                                                                                                               |
| AT5G59600 | UCGAGUAAGGCCUGUAGUAUG   | 250  | 3.5 | Cleavage    | [ Symbols:   Tetra tripeptide repeat (TPR)-like superfamily protein   chr5:24011000-24013025 REVERSE LENGTH=2026                                                                                                                                       |
| AT5G59630 | UUAAUACAAGUAGCUGACUCU   | 2805 | 4.5 | Cleavage    | [ Symbols:   pseudogene, glycine-rich protein, blastp match of 53% identity and 5.4e-10 P-value to GP19837280 [g]   AAG00510.1     AF285172 leaf senescence-associated receptor-like protein kinase [Phaseolus vulgaris]   chr5:24021433-240239;       |
| AT5G59650 | CUUCCCCUAGAUAUUCUUUCC   | 401  | 3.5 | Translation | [ Symbols:   Leucine-rich repeat protein kinase family protein   chr5:24031346-24035100 FORWARD LENGTH=2679                                                                                                                                            |
| AT5G59680 | CUUCCCCUAGAUAUUCUUUCC   | 401  | 3   | Translation | [ Symbols:   Leucine-rich repeat protein kinase family protein   chr5:24046792-24050801 FORWARD LENGTH=2694                                                                                                                                            |
| AT5G59830 | UGACGCGCAAUUCUGAAAGUUU  | 154  | 4.5 | Cleavage    | [ Symbols:   unknown protein; BEST Arabidopsis thaliana protein match is: unknown protein (TAIR:AT5G13660.2); Has 174 Blast hits to 139 proteins in 16 species: Archae - 0; Bacteria - 0; Metazoa - 0; Fungi - 0; Plants - 172; Viruses - 0; Other Euk |
| AT5G59900 | CUUCGACUGAAGUAAAGCGCCU  | 234  | 5   | Cleavage    | [ Symbols:   Pentatricopeptide repeat (PPR) superfamily protein   chr5:24123983-24126706 REVERSE LENGTH=2724                                                                                                                                           |
| AT5G60020 | CAUCAAGAACCGGUCAUGCCU   | 125  | 3   | Translation | [ Symbols: LAC17, ATLAC17   laccase 17   chr5:24167996-24170462 FORWARD LENGTH=2049                                                                                                                                                                    |
| AT5G60022 | UCCAAGUAGCUGACUCUCCUU   | 596  | 5   | Translation | [ Symbols:   other RNA   chr5:24167141-24170261 REVERSE LENGTH=1247                                                                                                                                                                                    |
| AT5G60040 | UUUGAGCACUCUACACAGCAGG  | 162  | 3.5 | Cleavage    | [ Symbols: NRP1C   nuclear RNA polymerase C1   chr5:24173403-24183641 FORWARD LENGTH=4582                                                                                                                                                              |
| AT5G60100 | UUUAGUUAUUUUGGCCUGAGGU  | 116  | 3.5 | Cleavage    | [ Symbols: APRR3, PRR3   pseudo-response regulator 3   chr5:24197999-24201364 REVERSE LENGTH=2100                                                                                                                                                      |
| AT5G60210 | UACAGAAUAGGCUUAAGUAUAC  | 189  | 4   | Translation | [ Symbols: RIPS   ROP interactive partner 5   chr5:24243083-24245968 REVERSE LENGTH=2130                                                                                                                                                               |
| AT5G60280 | AUUUGUUGCAGCUCUAGGGCG   | 128  | 3   | Translation | [ Symbols:   Concavallin A-like lectin protein kinase family protein   chr5:24260563-24262536 FORWARD LENGTH=1974                                                                                                                                      |
| AT5G60330 | UUUGAGGCGUAGCUGUAUGU    | 102  | 3.5 | Translation | [ Symbols:   unknown protein; FUNCTIONS IN: molecular_function unknown; INVOLVED IN: biological_process unknown; LOCATED IN: endomembrane system; BEST Arabidopsis thaliana protein match is: unknown protein (TAIR:AT3G645320.1); H                   |
| AT5G60380 | UACUGUACUGCGAAUUCUGUGA  | 271  | 5   | Translation | [ Symbols:   Protein of Unknown Function [DUF239]   chr5:24285920-24287808 FORWARD LENGTH=1122                                                                                                                                                         |
| AT5G60610 | UUACCCCUAGGUCUGUUAUUAAG | 267  | 4.5 | Cleavage    | [ Symbols:   F-box/RNl-like superfamily protein   chr5:24363591-24365528 FORWARD LENGTH=1441                                                                                                                                                           |
| AT5G60790 | UGCAUAUUCUUGGAGUUAUCCU  | 413  | 4   | Cleavage    | [ Symbols: ATGCN1, GCN1   ABC transporter family protein   chr5:24453258-24455970 REVERSE LENGTH=2387                                                                                                                                                  |
| AT5G60800 | UUUGCCUGUUAAGAACUCGAGUA | 114  | 3   | Translation | [ Symbols:   Heavy metal transport/detoxification superfamily protein   chr5:24460887-24462536 REVERSE LENGTH=1153                                                                                                                                     |
| AT5G60950 | UUUGAGAGAUCCCCUGUUGCUG  | 632  | 4   | Cleavage    | [ Symbols: COB15   COBRA-like protein 5 precursor   chr5:24526847-24528084 REVERSE LENGTH=1004                                                                                                                                                         |
| AT5G61010 | UUAUAGGCGUUGAAGAAAGUUC  | 535  | 3.5 | Cleavage    | [ Symbols: ATEX070E2, EXO70E2   exocyst subunit exo70 family protein E2   chr5:24553841-24556749 FORWARD LENGTH=2805                                                                                                                                   |
| AT5G61228 | UUACGAGACUUCUAGCCACGCU  | 3733 | 4   | Translation | [ Symbols: CpuOF15   conserved peptide upstream open reading frame 15   chr5:24627187-24628968 FORWARD LENGTH=1335                                                                                                                                     |
| AT5G61230 | UUACGAGACUUCUAGCCACGCU  | 3733 | 4   | Translation | [ Symbols:   Ankyrin repeat family protein   chr5:24627187-24628968 FORWARD LENGTH=1335                                                                                                                                                                |
| AT5G61250 | UGGCAGUAGGAGUACACGACU   | 163  | 5   | Cleavage    | [ Symbols: ATGUS1, GUS1   glucuronidase 1   chr5:24632154-24634805 REVERSE LENGTH=1841                                                                                                                                                                 |
| AT5G61280 | UCCCAACCCAUAGUUAAGCG    | 236  | 3   | Cleavage    | [ Symbols:   Remorin family protein   chr5:24643625-24644910 REVERSE LENGTH=792                                                                                                                                                                        |
| AT5G61440 | CCACGCAUCUAGUACAUAUGUC  | 446  | 4.5 | Cleavage    | [ Symbols: ACHT5   atypical CYS His rich thioredoxin 5   chr5:24707500-24708893 FORWARD LENGTH=1105                                                                                                                                                    |
| AT5G61470 | CUGGAGGACGUCAGACAUUA    | 113  | 4   | Cleavage    | [ Symbols:   CZH2-like zinc finger protein   chr5:24722870-24723983 FORWARD LENGTH=1114                                                                                                                                                                |
| AT5G61550 | UCGCGGAGGACGUAUAUAGCU   | 401  | 4.5 | Cleavage    | [ Symbols:   U-box domain-containing protein kinase family protein   chr5:24748102-24751871 FORWARD LENGTH=2715                                                                                                                                        |
| AT5G61670 | UGUGGUGUACUCUUCUACUCUGU | 106  | 4   | Cleavage    | [ Symbols:   Encodes a close homolog of the Cauliflower OR (Orange) protein. The function of OR is to induce the differentiation of proplastids or other noncolored plastids into chromoplasts for carotenoid accumulation. Both proteins contain a    |
| AT5G61740 | UUUGGAGGACUUCUUAUAGGCU  | 437  | 5   | Cleavage    | [ Symbols: ATATH14, ATATH14   ABC2 homolog 14   chr5:24808484-24810535 FORWARD LENGTH=2547                                                                                                                                                             |
| AT5G61790 | UCUUGUACUUGCAAUUUGAGCU  | 154  | 3.5 | Cleavage    | [ Symbols: CNX1, ATCNX1   calnexin 1   chr5:24827102-24829791 REVERSE LENGTH=2034                                                                                                                                                                      |
| AT5G61930 | UCUGUAUGCAUUAUCUUGGGAC  | 1212 | 3   | Cleavage    | [ Symbols: APO3   Arabidopsis thaliana protein of unknown function [DUF794]   chr5:24866075-24867821 REVERSE LENGTH=1520                                                                                                                               |
| AT5G61960 | UGAAGAUUUGGUGUUAACCA    | 474  | 4   | Cleavage    | [ Symbols: AML1, ML1   MEI2-like protein 1   chr5:24878521-24884720 REVERSE LENGTH=3886                                                                                                                                                                |
| AT5G61970 | CUUGAGGCUUAGUAGCCGAGUA  | 270  | 4.5 | Translation | [ Symbols:   signal recognition particle-related / SRP-related   chr5:24888617-24893328 FORWARD LENGTH=2265                                                                                                                                            |
| AT5G62170 | CUUUGUACUUCUAGAAUUCUUG  | 119  | 4   | Cleavage    | [ Symbols:   unknown protein; BEST Arabidopsis thaliana protein match is: unknown protein (TAIR:AT5G1850.1); Has 381 Blast hits to 359 proteins in 81 species: Archae - 0; Bacteria - 16; Metazoa - 101; Fungi - 21; Plants - 99; Viruses - 3; Other I |
| AT5G62190 | CAACGCUUCUUGAUACAUCAUAG | 133  | 3   | Cleavage    | [ Symbols: PRH75   DEAD box RNA helicase (PRH75)   chr5:24980268-24983973 REVERSE LENGTH=2384                                                                                                                                                          |
| AT5G62220 | UGACGGACAAGAAUAGCUGCU   | 259  | 4   | Translation | [ Symbols: ATGT18, GT18   glycosyltransferase 18   chr5:24988456-24990009 REVERSE LENGTH=1554                                                                                                                                                          |
| AT5G62310 | UUGGAGAAACUCCUGACCCGA   | 1272 | 4   | Cleavage    | [ Symbols: IRE   AGC (cAMP-dependent, cGMP-dependent and protein kinase C) kinase family protein   chr5:25023355-25028414 FORWARD LENGTH=3557                                                                                                          |
| AT5G62600 | UGACGCGCAAUUCUGAAAGUUU  | 154  | 3   | Cleavage    | [ Symbols:   ARM repeat superfamily protein   chr5:25123051-25132676 REVERSE LENGTH=3366                                                                                                                                                               |
| AT5G62700 | UUUCUCCUUGGUGUGCGGCCU   | 170  | 3   | Cleavage    | [ Symbols: TUB3   tubulin beta chain 3   chr5:25184397-25186711 FORWARD LENGTH=1742                                                                                                                                                                    |
| AT5G63150 | UCCACCGCAUGUAGCAAAUGU   | 1524 | 4.5 | Cleavage    | [ Symbols:   unknown protein; FUNCTIONS IN: molecular_function unknown; INVOLVED IN: biological_process unknown; LOCATED IN: mitochondrion; EXPRESSED IN: 22 plant structures; EXPRESSED DURING: 13 growth stages; CONTAINS InterPro                   |
| AT5G63320 | CUGGGAGAAAGAGAAAGGCU    | 259  | 3.5 | Translation | [ Symbols: NXP1   nuclear protein X1   chr5:25377096-25379246 REVERSE LENGTH=1981                                                                                                                                                                      |
| AT5G63370 | UCACUUCUGUGCAAGUAGUACC  | 138  | 3.5 | Translation | [ Symbols:   Protein kinase superfamily protein   chr5:25384172-25387252 REVERSE LENGTH=2943                                                                                                                                                           |
| AT5G63410 | UUUCUAGCUGAGGUUAGCGCCU  | 355  | 4   | Translation | [ Symbols:   Leucine-rich repeat protein kinase family protein   chr5:25394984-25398153 REVERSE LENGTH=2492                                                                                                                                            |
| AT5G63460 | UCUAGUUGCGGUUCUUCAGAC   | 300  | 4   | Cleavage    | [ Symbols:   SAP domain-containing protein   chr5:25413356-25415592 REVERSE LENGTH=742                                                                                                                                                                 |
| AT5G63510 | AUUGCAAUUUUUGACGACCU    | 113  | 3.5 | Cleavage    | [ Symbols: GAMMA CAL1   gamma carbonic anhydrase like 1   chr5:25423984-25425941 FORWARD LENGTH=1058                                                                                                                                                   |
| AT5G63580 | UUUGUUAUUGUUGGUGUUAUCC  | 113  | 3.5 | Cleavage    | [ Symbols: FL52, ATFL52   flavonol synthase 2   chr5:25454730-25455476 FORWARD LENGTH=1137                                                                                                                                                             |
| AT5G63600 | UUUGAGGUCUUCUACUUAUGA   | 437  | 4   | Translation | [ Symbols: FL55, ATFL55   flavonol synthase 5   chr5:25460684-25462458 REVERSE LENGTH=1567                                                                                                                                                             |
| AT5G63610 | UGACGGAAGCUACAGAGAGU    | 108  | 4.5 | Cleavage    | [ Symbols: HEN3, CDKE1, ATCDK8   cyclin-dependent kinase E1   chr5:25463437-25465897 REVERSE LENGTH=1901                                                                                                                                               |

|           |                         |      |                 |                                                                                                                                                                                                                                                        |
|-----------|-------------------------|------|-----------------|--------------------------------------------------------------------------------------------------------------------------------------------------------------------------------------------------------------------------------------------------------|
| AT5G63630 | UGUUACGAGACUCUAGCCCA    | 574  | 3.5 Translation | Symbols:   P-loop containing nucleoside triphosphate hydrolases superfamily protein   chr5:25472598-25476511 REVERSE LENGTH=2476                                                                                                                       |
| AT5G63770 | UAUCGAGCACCUACGUAUCU    | 142  | 4 Cleavage      | Symbols: ATD2GK2, DGK2   diacylglycerol kinase 2   chr5:25518641-25523621 FORWARD LENGTH=3580                                                                                                                                                          |
| AT5G63790 | UGACGCCAAUUCUGAAGUUU    | 154  | 3.5 Translation | Symbols: ANAC102, NAC102   NAC domain containing protein 102   chr5:25526509-25528013 REVERSE LENGTH=1317                                                                                                                                              |
| AT5G63870 | UCUUGGCAUCGAAUUGAACU    | 154  | 3.5 Cleavage    | Symbols: PP7   serine/threonine phosphatase 7   chr5:25561172-25563274 REVERSE LENGTH=1615                                                                                                                                                             |
| AT5G63950 | CUUCGACUGAGGUAAGCCGC    | 234  | 3.5 Cleavage    | Symbols: CHR24   chromatin remodeling 24   chr5:25591956-25598505 REVERSE LENGTH=3577                                                                                                                                                                  |
| AT5G64080 | UUUGAGCACUCUACACAGCAG   | 162  | 4 Translation   | Symbols:   Bifunctional inhibitor/lipid-transfer protein/seed storage 25 albumin superfamily protein   chr5:25645263-25646728 REVERSE LENGTH=839                                                                                                       |
| AT5G64170 | UUUGCUGAACAUAGUAUCCUA   | 119  | 4 Cleavage      | Symbols:   dentin sialophosphoprotein-related   chr5:25672466-25676746 REVERSE LENGTH=2590                                                                                                                                                             |
| AT5G64310 | UCAACACUCUGAUACACUUA    | 143  | 4 Cleavage      | Symbols: AGP1, ATGP1   arabinogalactan protein 1   chr5:25721933-25722646 FORWARD LENGTH=714                                                                                                                                                           |
| AT5G64390 | CUCAACAUGUAUUAAGGCUUG   | 208  | 4 Cleavage      | Symbols: HEN4   RNA-binding KH domain-containing protein   chr5:25743344-25747548 FORWARD LENGTH=2840                                                                                                                                                  |
| AT5G64440 | UCUAUGUCCGAUUUUUGGCAC   | 421  | 3.5 Cleavage    | Symbols: AFAAH, FAAH   fatty acid amide hydrolase   chr5:25765750-25770500 FORWARD LENGTH=2227                                                                                                                                                         |
| AT5G64480 | UUUAUACCGAACUCUUGGCC    | 310  | 4 Cleavage      | Symbols:   unknown protein; Has 35333 Blast hits to 34131 proteins in 2444 species: Archae - 798; Bacteria - 22429; Metazoa - 974; Fungi - 991; Plants - 531; Viruses - 0; Other Eukaryotes - 9610 (source: NCBI BLINK).   chr5:25778169-25778922      |
| AT5G64500 | AAACGAGACAAAGUUAUCGCC   | 986  | 4 Translation   | Symbols:   Major facilitator superfamily protein   chr5:25780382-25783654 FORWARD LENGTH=1764                                                                                                                                                          |
| AT5G64560 | UUUCCUGUUGAACUCGAGUA    | 114  | 3 Cleavage      | Symbols: MGT9, MRS2-2, ATMG19   magnesium transporter 9   chr5:25807121-25809595 REVERSE LENGTH=1299                                                                                                                                                   |
| AT5G64680 | AACAACACUGUUGAACAGCCU   | 111  | 3 Translation   | Symbols:   unknown protein; FUNCTIONS IN: molecular_function unknown; INVOLVED IN: biological_process unknown; LOCATED IN: nucleolus; EXPRESSED IN: 23 plant structures; EXPRESSED DURING: 13 growth stages; Has 1807 Blast hits to 11                 |
| AT5G64790 | GCAAGUGAUGUAUAAAAGACA   | 100  | 4.5 Cleavage    | Symbols:   O-Glycosyl hydrolases family 17 protein   chr5:25902641-25904701 FORWARD LENGTH=1672                                                                                                                                                        |
| AT5G64880 | UUUAAAACGAGGACUUUUGC    | 115  | 3.5 Cleavage    | Symbols:   unknown protein; Has 30201 Blast hits to 17322 proteins in 780 species: Archae - 12; Bacteria - 1396; Metazoa - 17338; Fungi - 3422; Plants - 5037; Viruses - 0; Other Eukaryotes - 2996 (source: NCBI BLINK).   chr5:25932290-2593415      |
| AT5G64905 | GCAAGUGAUGUAUAAAAGACA   | 100  | 3 Translation   | Symbols: PROPEP3   elicitor peptide 3 precursor   chr5:25939574-25940059 FORWARD LENGTH=486                                                                                                                                                            |
| AT5G64950 | UUCGAGGAGAUUAGACGCCGC   | 4887 | 4 Translation   | Symbols:   Mitochondrial transcription termination factor family protein   chr5:25953844-25955160 FORWARD LENGTH=1317                                                                                                                                  |
| AT5G65090 | UCCUGAGGACGCUCCUCCGC    | 106  | 3.5 Translation | Symbols: MRH3, BST1, DER4   DNase I-like superfamily protein   chr5:26004724-26006851 FORWARD LENGTH=1709                                                                                                                                              |
| AT5G65158 | UGCUAUGAUUGCUACUCUGA    | 125  | 5 Cleavage      | Symbols:   Lipase/lipoxygenase, PLAT/LH2 family protein   chr5:26030100-26031003 FORWARD LENGTH=809                                                                                                                                                    |
| AT5G65160 | UUUGAUUACCCGUAUAAACUC   | 175  | 3.5 Cleavage    | Symbols: TPR14   tetratricopeptide repeat (TPR)-containing protein   chr5:26031184-26033889 REVERSE LENGTH=2276                                                                                                                                        |
| AT5G65350 | UCUCAUGUAGUUCUAGUUCGCA  | 1437 | 4 Cleavage      | Symbols: HTR11   histone 3.11   chr5:26119211-26119825 REVERSE LENGTH=615                                                                                                                                                                              |
| AT5G65380 | UUACGGGUGAAGAACUUGACU   | 1291 | 4 Cleavage      | Symbols:   MATE efflux family protein   chr5:26122889-26126439 REVERSE LENGTH=1800                                                                                                                                                                     |
| AT5G65500 | CUCAACAUGUAUUAAGGCUUG   | 110  | 4.5 Translation | Symbols:   U-box domain-containing protein kinase family protein   chr5:26181093-26183997 REVERSE LENGTH=2376                                                                                                                                          |
| AT5G65550 | UCCCAACCAUGAUUUAAGCG    | 236  | 4 Cleavage      | Symbols:   UDP-Glycosyltransferase superfamily protein   chr5:26198304-26199827 REVERSE LENGTH=1524                                                                                                                                                    |
| AT5G65570 | AUUCGAGAACUCCUACGCCGC   | 350  | 4.5 Cleavage    | Symbols:   Tetratricopeptide repeat (TPR)-like superfamily protein   chr5:26203968-26206184 FORWARD LENGTH=2217                                                                                                                                        |
| AT5G65600 | CAAAUUCGAGAACUCCUGAC    | 283  | 4 Cleavage      | Symbols:   Concanavalin A-like lectin protein kinase family protein   chr5:26216126-26218153 REVERSE LENGTH=2028                                                                                                                                       |
| AT5G65620 | UGACGGAAUCUACAGAGAUUG   | 108  | 3 Cleavage      | Symbols:   Zincin-like metalloproteases family protein   chr5:26221932-26225903 FORWARD LENGTH=2514                                                                                                                                                    |
| AT5G65670 | UAGAGUGUUCUAGUUAUGUCA   | 232  | 3 Translation   | Symbols: IAA9   indole-3-acetic acid inducible 9   chr5:26253658-26256381 FORWARD LENGTH=1531                                                                                                                                                          |
| AT5G65687 | ACAAACUGUUGUACACAGCCU   | 1107 | 3 Cleavage      | Symbols:   Major facilitator superfamily protein   chr5:26269856-26278999 REVERSE LENGTH=1773                                                                                                                                                          |
| AT5G65700 | UUUUGAGAGCCUUGUAGUAGU   | 118  | 2.5 Translation | Symbols: BAM1   Leucine-rich receptor-like protein kinase family protein   chr5:26281757-26285247 FORWARD LENGTH=3383                                                                                                                                  |
| AT5G65770 | UUAAACUACCCUUGGACUUC    | 380  | 3 Translation   | Symbols: UNC4   little nuclel4   chr5:26311587-26315544 FORWARD LENGTH=3129                                                                                                                                                                            |
| AT5G65780 | UUAACUACCCUUGGACUUC     | 380  | 3 Translation   | Symbols: ATBCAT-5   branched-chain amino acid aminotransferase 5 / branched-chain amino acid transaminase 5 (BCAT5)   chr5:26311311-26316025 FORWARD LENGTH=3579                                                                                       |
| AT5G65790 | UAGAGUUAAGUUGGACAGGA    | 199  | 4 Cleavage      | Symbols: ATMYB68, MYB68   myb domain protein 68   chr5:26322948-26324578 FORWARD LENGTH=1405                                                                                                                                                           |
| AT5G65870 | UGUUGAUCCAAGUAGCUGACU   | 608  | 3.5 Cleavage    | Symbols: ATPSK5, PSK5   phytosulfokine 5 precursor   chr5:26351508-26352269 FORWARD LENGTH=533                                                                                                                                                         |
| AT5G65925 | UGCCAUGAUCGAGAGCUGCCU   | 164  | 4.5 Cleavage    | Symbols:   unknown protein; BEST Arabidopsis thaliana protein match is: unknown protein (TAIR:AT3G49820.1); Has 45 Blast hits to 45 proteins in 6 species: Archae - 0; Bacteria - 0; Metazoa - 0; Fungi - 0; Plants - 45; Viruses - 0; Other Eukaryoti |
| AT5G66180 | UUGGACGCCUUCUACUAGAGA   | 679  | 3.5 Translation | Symbols:   S-adenosyl-L-methionine-dependent methyltransferases superfamily protein   chr5:26448938-26451154 FORWARD LENGTH=1437                                                                                                                       |
| AT5G66190 | UACAGGAAGUGGGGCGCACACC  | 102  | 4 Translation   | Symbols: ATFLNR1, FNR1   ferredoxin-NAD(P)(+)-oxidoreductase 1   chr5:26450964-26453199 REVERSE LENGTH=1509                                                                                                                                            |
| AT5G66220 | UUCGAGAACUCCUUGACCGGA   | 1272 | 3.5 Translation | Symbols:   Chalcone-flavanone isomerase family protein   chr5:26461177-26462174 FORWARD LENGTH=696                                                                                                                                                     |
| AT5G66230 | UUCGAGAACUCCUUGACCGGA   | 1272 | 3.5 Translation | Symbols:   Chalcone-flavanone isomerase family protein   chr5:26461152-26463916 FORWARD LENGTH=1706                                                                                                                                                    |
| AT5G66455 | UGCCAUGAUCGAGAGCUGCCU   | 164  | 3.5 Cleavage    | Symbols:   pseudogene of pentatricopeptide (PPR) repeat-containing protein   chr5:26535980-26538011 REVERSE LENGTH=1449                                                                                                                                |
| AT5G66520 | UAUCUCUGAGAGCGGUGCUUGCC | 101  | 4.5 Translation | Symbols:   Tetratricopeptide repeat (TPR)-like superfamily protein   chr5:26551879-26553741 FORWARD LENGTH=1863                                                                                                                                        |
| AT5G66710 | UUCGAGAACUCCUUGACCGGA   | 1272 | 3.5 Cleavage    | Symbols:   Protein kinase superfamily protein   chr5:26636609-26638794 FORWARD LENGTH=1448                                                                                                                                                             |
| AT5G66790 | UCUGUACCCGUGAUUUCUUC    | 275  | 3.5 Cleavage    | Symbols:   Protein kinase superfamily protein   chr5:26665142-26667531 FORWARD LENGTH=2052                                                                                                                                                             |
| AT5G66890 | AAACGAGCAAGUUAUCUGGCC   | 986  | 4.5 Cleavage    | Symbols:   Leucine-rich repeat (LRR) family protein   chr5:26712944-26714383 REVERSE LENGTH=1248                                                                                                                                                       |
| AT5G67170 | UGACGGACAAGAUAGCUGUC    | 259  | 4.5 Cleavage    | Symbols:   SEC-C motif-containing protein / OTU-like cysteine protease family protein   chr5:26799771-26802067 FORWARD LENGTH=1407                                                                                                                     |
| AT5G67220 | UUCCGAGGAGCGAGGUGCCU    | 112  | 3.5 Cleavage    | Symbols:   FMN-linked oxidoreductases superfamily protein   chr5:26820121-26821964 REVERSE LENGTH=1465                                                                                                                                                 |
| AT5G67270 | UUUUGAUUCACCGGAUUAACUC  | 104  | 4 Cleavage      | Symbols: ATEB1C, EB1C, ATEB1H1   end binding protein 1C   chr5:26840070-26842081 REVERSE LENGTH=1265                                                                                                                                                   |
| AT5G67310 | UACCGGAGGACGUAAGACUUC   | 153  | 3.5 Cleavage    | Symbols: CYP81G1   cytochrome P450, family 81, subfamily G, polypeptide 1   chr5:26855216-26856941 REVERSE LENGTH=1638                                                                                                                                 |
| AT5G67630 | UCACUCGCGACUUGAAGACUC   | 146  | 4.5 Cleavage    | Symbols:   P-loop containing nucleoside triphosphate hydrolases superfamily protein   chr5:26967381-26969394 REVERSE LENGTH=1652                                                                                                                       |
| ATCG00300 | UAUCUCGACCACACUGUAGGA   | 183  | 3.5 Translation | Symbols: YCF9   YCF9   chrC:35751-35939 FORWARD LENGTH=189                                                                                                                                                                                             |
| ATCG00590 | UUUUGCUUAGACUAGAGAAACU  | 179  | 2.5 Cleavage    | Symbols: ORF31   electron carriers   chrC:65712-65807 FORWARD LENGTH=96                                                                                                                                                                                |
| ATCG00800 | UUCGGAUCGGUAGGACUAGG    | 101  | 3.5 Translation | Symbols:   structural constituent of ribosome   chrC:82826-83482 REVERSE LENGTH=657                                                                                                                                                                    |
| ATCG00830 | UAACAUIUCGAGCACUCCUG    | 156  | 3.5 Translation | Symbols: RPL2.1   ribosomal protein L2   chrC:84337-85843 REVERSE LENGTH=825                                                                                                                                                                           |
| ATCG01310 | UAACAUIUCGAGCACUCCUG    | 156  | 3.5 Translation | Symbols: RPL2.2   ribosomal protein L2   chrC:152806-154312 FORWARD LENGTH=825                                                                                                                                                                         |
| ATMG00260 | UAUGAGUUAUGUACGACAGAAU  | 123  | 3.5 Cleavage    | Symbols: ORF101A   hypothetical protein   chrM:76132-76437 FORWARD LENGTH=306                                                                                                                                                                          |
| ATMG00570 | CUUCCCUUAGAUAUUCUUUCC   | 401  | 3 Cleavage      | Symbols: ORFX   Sec-independent periplasmic protein translocase   chrM:157491-158351 FORWARD LENGTH=861                                                                                                                                                |
| ATMG00730 | UAACUUCUACCUUUGCACUUC   | 727  | 4.5 Cleavage    | Symbols: COX3   cytochrome c oxidase subunit 3   chrM:217631-219077 FORWARD LENGTH=1447                                                                                                                                                                |
| ATMG01130 | UUCGGAUCGGAUAGGACUAGG   | 101  | 4 Cleavage      | Symbols: ORF106F   hypothetical protein   chrM:289197-289517 REVERSE LENGTH=321                                                                                                                                                                        |
| ATMG01210 | UGAGAACAUUGACUUCAGACCU  | 158  | 5 Cleavage      | Symbols: ORF101B   hypothetical protein   chrM:304779-305084 REVERSE LENGTH=306                                                                                                                                                                        |

total=3102

### Supplemental Table 3

Genes decreased at least 2-fold at  $p < 0.05$  in *ddm1* F6 vs wt Col

| Probe Set ID | Gene      | Value in <i>ddm1</i> F6 | Value in wt Col | Fold change ( <i>ddm1</i> F6 / wt Col) | p-value     | TE in gene space? |
|--------------|-----------|-------------------------|-----------------|----------------------------------------|-------------|-------------------|
| 251252_at    | AT3G62230 | 260.10                  | 10.06           | 25.79982                               | 4.05E-04    | no                |
| 266665_at    | AT2G29790 | 196.68                  | 12.29           | 17.02106                               | 2.58E-04    | yes               |
| 255008_at    | AT4G10060 | 450.46                  | 33.95           | 13.502051                              | 4.62E-06    | yes               |
| 260100_at    | AT1G73177 | 227.50                  | 18.23           | 12.684839                              | 1.93E-06    | no                |
| 247424_at    | AT5G62850 | 634.59                  | 55.62           | 12.237515                              | 7.84E-04    | no                |
| 261943_at    | AT1G80660 | 888.62                  | 90.53           | 11.330644                              | 0.001402831 | no                |
| 260557_at    | AT2G43610 | 118.99                  | 11.59           | 10.145937                              | 6.50E-05    | no                |
| 246789_at    | AT5G27600 | 70.30                   | 7.41            | 9.469623                               | 4.85E-05    | yes               |
| 249226_at    | AT5G42170 | 216.04                  | 23.04           | 9.305346                               | 7.42E-04    | yes               |
| 257256_at    | AT3G21970 | 309.66                  | 42.54           | 7.9923186                              | 5.60E-04    | no                |
| 258561_at    | AT3G05960 | 132.33                  | 16.78           | 7.9372573                              | 8.09E-05    | no                |
| 258408_at    | AT3G17630 | 120.66                  | 15.91           | 7.892432                               | 1.27E-04    | yes               |
| 261532_at    | AT1G71680 | 176.72                  | 23.79           | 7.6151543                              | 1.55E-04    | yes               |
| 265405_at    | AT2G16750 | 415.86                  | 58.19           | 7.486453                               | 2.26E-04    | no                |
| 254972_at    | AT4G10440 | 124.67                  | 18.05           | 7.3581605                              | 6.33E-04    | no                |
| 267317_at    | AT2G34700 | 48.08                   | 6.44            | 7.329497                               | 1.40E-04    | yes               |
| 265080_at    | AT1G55570 | 1050.12                 | 153.85          | 7.036429                               | 3.09E-04    | no                |
| 264112_at    | AT2G13680 | 139.55                  | 20.38           | 6.9105945                              | 9.90E-05    | no                |
| 257726_at    | AT3G18360 | 180.41                  | 27.56           | 6.8825173                              | 0.001930365 | no                |
| 265053_at    | AT1G52000 | 216.96                  | 31.63           | 6.651175                               | 2.68E-05    | yes               |
| 258671_at    | AT3G08560 | 234.78                  | 37.69           | 6.648874                               | 0.00118247  | yes               |
| 259189_at    | AT3G01700 | 404.46                  | 63.62           | 6.5997653                              | 0.001071539 | no                |
| 249245_at    | AT5G42280 | 69.60                   | 10.90           | 6.4735227                              | 0.001490637 | yes               |
| 256638_at    | AT3G19090 | 70.74                   | 10.98           | 6.4475327                              | 0.001144193 | no                |
| 265280_at    | AT2G28355 | 1046.74                 | 177.99          | 6.2346315                              | 0.001068629 | yes               |
| 262463_at    | AT1G50310 | 738.61                  | 122.18          | 6.15808                                | 3.38E-04    | no                |
| 261015_at    | AT1G26480 | 142.57                  | 23.23           | 6.105908                               | 3.18E-04    | no                |
| 253226_at    | AT4G35010 | 498.95                  | 83.36           | 6.0371876                              | 3.73E-04    | no                |
| 257059_at    | AT3G15280 | 88.33                   | 14.97           | 6.0081296                              | 8.54E-04    | no                |
| 249048_at    | AT5G44300 | 1686.73                 | 284.78          | 5.981856                               | 3.63E-04    | yes               |
| 253151_at    | AT4G35670 | 82.58                   | 14.05           | 5.8549027                              | 2.74E-04    | no                |
| 247056_at    | AT5G66750 | 195.42                  | 33.70           | 5.802461                               | 9.58E-06    | no                |
| 254961_at    | AT4G11030 | 55.79                   | 10.00           | 5.696744                               | 7.75E-04    | no                |
| 250631_at    | AT5G07430 | 888.42                  | 161.63          | 5.6322875                              | 0.001733625 | yes               |
| 254886_at    | AT4G11760 | 1680.54                 | 303.20          | 5.6253586                              | 7.14E-04    | yes               |
| 258639_at    | AT3G07820 | 2108.48                 | 394.78          | 5.443635                               | 5.36E-04    | no                |
| 256587_at    | AT3G28780 | 747.03                  | 137.62          | 5.417619                               | 3.02E-04    | yes               |
| 258465_at    | AT3G17220 | 109.71                  | 20.24           | 5.383513                               | 6.05E-04    | no                |
| 254033_at    | AT4G25950 | 147.19                  | 28.13           | 5.356676                               | 0.001304095 | no                |
| 267178_at    | AT2G37750 | 98.02                   | 18.24           | 5.3214355                              | 1.15E-04    | no                |
| 256581_at    | AT3G28830 | 2820.30                 | 532.00          | 5.318562                               | 2.00E-04    | yes               |
| 262022_at    | AT1G35490 | 105.67                  | 21.52           | 5.2948923                              | 0.00151673  | yes               |
| 263950_at    | AT2G36020 | 72.93                   | 14.22           | 5.2909064                              | 0.001208057 | no                |
| 245912_at    | AT5G19600 | 64.65                   | 12.80           | 5.210883                               | 0.001921586 | no                |
| 259269_at    | AT3G01270 | 1436.81                 | 276.57          | 5.180692                               | 8.64E-04    | yes               |
| 260888_at    | AT1G29140 | 463.45                  | 95.79           | 5.144302                               | 0.00143741  | no                |
| 267643_at    | AT2G32890 | 265.05                  | 53.03           | 5.098985                               | 5.89E-04    | yes               |
| 266654_at    | AT2G25890 | 88.02                   | 18.19           | 5.08119                                | 0.001135627 | no                |
| 247253_at    | AT5G64790 | 46.25                   | 9.10            | 5.0729113                              | 0.002048545 | yes               |
| 257158_at    | AT3G24360 | 50.70                   | 9.87            | 5.068173                               | 0.007479937 | yes               |
| 247512_at    | AT5G61720 | 896.02                  | 179.70          | 5.012007                               | 4.11E-04    | no                |
| 264208_at    | AT1G22760 | 553.76                  | 109.02          | 4.992296                               | 1.36E-04    | no                |
| 256588_at    | AT3G28790 | 2739.01                 | 549.49          | 4.9804993                              | 1.51E-04    | yes               |
| 255717_at    | AT4G00350 | 55.69                   | 10.79           | 4.966897                               | 6.16E-04    | yes               |
| 265473_at    | AT2G15535 | 89.81                   | 18.66           | 4.9483733                              | 0.004093149 | yes               |
| 245946_at    | AT5G19580 | 1019.88                 | 206.34          | 4.938102                               | 9.06E-04    | no                |

|           |           |         |         |           |             |     |
|-----------|-----------|---------|---------|-----------|-------------|-----|
| 265552_at | AT2G07560 | 1292.17 | 266.27  | 4.9360094 | 1.50E-04    | yes |
| 254104_at | AT4G25040 | 501.20  | 126.38  | 4.9297276 | 0.007975142 | yes |
| 256584_at | AT3G28750 | 1593.51 | 326.27  | 4.921364  | 5.11E-04    | no  |
| 250174_at | AT5G14380 | 1750.30 | 358.53  | 4.9080043 | 9.21E-04    | yes |
| 248822_at | AT5G47000 | 150.46  | 35.95   | 4.8835526 | 0.00495313  | yes |
| 266765_at | AT2G46860 | 261.37  | 62.56   | 4.856438  | 0.00736629  | no  |
| 245335_at | AT4G16160 | 80.84   | 16.95   | 4.765691  | 5.01E-04    | no  |
| 251258_at | AT3G62170 | 2729.78 | 575.89  | 4.76068   | 4.94E-04    | no  |
| 267449_at | AT2G33690 | 89.31   | 19.03   | 4.7399125 | 7.58E-04    | no  |
| 257313_at | AT3G26520 | 5571.85 | 1170.56 | 4.7342634 | 2.52E-05    | yes |
| 256647_at | AT3G13610 | 91.52   | 20.58   | 4.6766973 | 0.003796151 | no  |
| 265031_at | AT1G61590 | 35.51   | 7.12    | 4.643443  | 0.003148268 | no  |
| 262664_at | AT1G13970 | 70.88   | 17.00   | 4.6249847 | 0.005786907 | no  |
| 262156_at | AT1G52680 | 649.07  | 142.20  | 4.6138635 | 0.00207021  | yes |
| 256966_at | AT3G13400 | 2258.67 | 494.55  | 4.573046  | 4.39E-04    | no  |
| 255515_at | AT4G02250 | 295.23  | 65.92   | 4.5691    | 0.002159848 | yes |
| 262147_at | AT1G52570 | 184.70  | 40.57   | 4.5664897 | 8.46E-05    | no  |
| 264235_at | AT1G54560 | 139.73  | 31.37   | 4.431889  | 6.49E-05    | no  |
| 265176_at | AT1G23520 | 206.19  | 47.68   | 4.3684716 | 6.29E-04    | no  |
| 264580_at | AT1G05340 | 53.53   | 12.25   | 4.3423533 | 0.00740631  | no  |
| 250904_at | AT5G03620 | 159.85  | 36.24   | 4.340688  | 5.52E-04    | no  |
| 254716_at | AT4G13560 | 4536.98 | 1078.17 | 4.331763  | 7.23E-04    | no  |
| 253725_at | AT4G29340 | 480.56  | 112.44  | 4.3113494 | 2.01E-04    | yes |
| 254762_at | AT4G13230 | 884.60  | 210.62  | 4.293254  | 0.001257119 | yes |
| 248824_at | AT5G46940 | 162.99  | 42.72   | 4.278178  | 0.017119208 | yes |
| 249536_at | AT5G38760 | 2466.93 | 579.66  | 4.252036  | 2.94E-04    | yes |
| 248227_at | AT5G53820 | 2700.54 | 640.43  | 4.2221837 | 1.25E-04    | no  |
| 255530_at | AT4G02140 | 378.60  | 90.61   | 4.2041316 | 5.89E-04    | no  |
| 254415_at | AT4G21326 | 35.33   | 8.42    | 4.183755  | 5.21E-05    | no  |
| 257986_at | AT3G20865 | 1175.93 | 284.33  | 4.1754913 | 4.03E-04    | no  |
| 254287_at | AT4G22960 | 218.59  | 57.35   | 4.1476974 | 0.004939083 | no  |
| 262122_at | AT1G02790 | 3477.93 | 839.27  | 4.1470613 | 2.88E-04    | no  |
| 250514_at | AT5G09550 | 736.96  | 182.11  | 4.1369324 | 0.001113325 | no  |
| 258058_at | AT3G28980 | 3029.94 | 735.56  | 4.1324463 | 0.001344193 | no  |
| 255276_at | AT4G04930 | 67.36   | 16.35   | 4.1294913 | 0.001079603 | yes |
| 265179_at | AT1G23650 | 104.67  | 26.33   | 4.1070952 | 0.001645239 | no  |
| 258851_at | AT3G03190 | 40.77   | 10.15   | 4.075465  | 0.033683732 | no  |
| 251180_at | AT3G62640 | 65.24   | 16.33   | 4.0702353 | 0.003551517 | no  |
| 246915_at | AT5G25880 | 122.99  | 30.81   | 4.033137  | 5.40E-04    | yes |
| 259793_at | AT1G64380 | 39.41   | 9.81    | 4.0330153 | 8.69E-05    | no  |
| 258498_at | AT3G02480 | 2087.01 | 523.30  | 3.9992898 | 0.00179056  | no  |
| 256354_at | AT1G54870 | 82.72   | 21.32   | 3.94937   | 0.004229826 | yes |
| 266697_at | AT2G19770 | 712.32  | 182.84  | 3.9177396 | 7.33E-04    | yes |
| 259044_at | AT3G03430 | 535.47  | 142.96  | 3.9152694 | 0.001368067 | no  |
| 255861_at | AT2G30290 | 36.24   | 9.14    | 3.8725908 | 0.013892815 | no  |
| 259265_at | AT3G01250 | 349.21  | 91.83   | 3.8630598 | 0.007785429 | no  |
| 246431_at | AT5G17480 | 1139.05 | 303.57  | 3.8623755 | 0.001564621 | yes |
| 266764_at | AT2G47050 | 1996.59 | 535.23  | 3.827247  | 0.001432283 | no  |
| 263753_at | AT2G21490 | 484.46  | 127.21  | 3.814271  | 0.001892292 | no  |
| 248926_at | AT5G45880 | 1696.71 | 447.67  | 3.8024123 | 5.80E-04    | no  |
| 246878_at | AT5G26060 | 47.84   | 12.68   | 3.7851985 | 0.008195365 | no  |
| 245036_at | AT2G26410 | 21.97   | 5.62    | 3.7581515 | 0.012612021 | yes |
| 248714_at | AT5G48140 | 109.98  | 29.62   | 3.7514598 | 0.001812005 | yes |
| 248484_at | AT5G51030 | 99.29   | 27.81   | 3.7455623 | 0.00222101  | yes |
| 250608_at | AT5G07420 | 222.58  | 61.19   | 3.738575  | 0.002591189 | yes |
| 263909_at | AT2G36490 | 145.30  | 40.77   | 3.696608  | 3.87E-04    | yes |
| 259266_at | AT3G01240 | 925.14  | 252.09  | 3.6842976 | 0.003343268 | no  |
| 264395_at | AT1G12070 | 104.96  | 31.48   | 3.6799912 | 0.012735958 | no  |
| 245658_at | AT1G28270 | 894.90  | 247.11  | 3.6355426 | 0.001051357 | no  |
| 265115_at | AT1G62450 | 51.22   | 14.21   | 3.625685  | 1.80E-04    | yes |

|           |           |         |        |           |             |     |
|-----------|-----------|---------|--------|-----------|-------------|-----|
| 256955_at | AT3G13390 | 438.16  | 124.96 | 3.6117435 | 7.10E-04    | no  |
| 247122_at | AT5G66020 | 55.77   | 16.02  | 3.565601  | 1.65E-04    | no  |
| 264603_at | AT1G04670 | 320.69  | 89.83  | 3.5651546 | 0.002010378 | no  |
| 261942_at | AT1G22590 | 220.83  | 62.14  | 3.5470347 | 9.71E-05    | no  |
| 250957_at | AT5G03250 | 83.62   | 23.98  | 3.54573   | 8.31E-04    | no  |
| 263754_at | AT2G21510 | 54.41   | 15.44  | 3.544004  | 0.017452165 | no  |
| 265188_at | AT1G23800 | 390.33  | 113.86 | 3.5097258 | 3.28E-04    | no  |
| 265923_at | AT2G18470 | 59.06   | 16.92  | 3.5027149 | 6.18E-04    | yes |
| 262760_at | AT1G10770 | 932.10  | 273.40 | 3.4457767 | 0.001644095 | no  |
| 258748_at | AT3G05930 | 62.90   | 18.99  | 3.445511  | 0.007476477 | no  |
| 251590_at | AT3G57690 | 1972.45 | 575.47 | 3.4413326 | 1.28E-04    | no  |
| 252531_at | AT3G46520 | 85.54   | 24.87  | 3.4368322 | 5.47E-04    | no  |
| 258685_at | AT3G07830 | 43.10   | 12.36  | 3.4361675 | 0.009527023 | no  |
| 261511_at | AT1G71770 | 459.33  | 132.83 | 3.4310496 | 6.04E-04    | yes |
| 265002_at | AT1G24400 | 264.77  | 77.78  | 3.392483  | 6.17E-04    | no  |
| 247736_at | AT5G59370 | 92.22   | 27.37  | 3.3895378 | 8.06E-04    | no  |
| 245232_at | AT4G25590 | 223.21  | 66.48  | 3.3650608 | 0.002626282 | no  |
| 252102_at | AT3G50970 | 463.20  | 141.80 | 3.3537579 | 0.021862911 | no  |
| 247055_at | AT5G66740 | 46.79   | 13.98  | 3.3505068 | 0.00108267  | no  |
| 256307_at | AT1G30350 | 308.83  | 92.85  | 3.348251  | 2.50E-04    | no  |
| 252820_at | AT3G42640 | 386.65  | 117.49 | 3.3208952 | 0.001712484 | no  |
| 264151_at | AT1G02070 | 57.68   | 18.05  | 3.3098695 | 0.002237665 | no  |
| 252107_at | AT3G51490 | 140.48  | 42.80  | 3.2976906 | 1.63E-04    | no  |
| 249375_at | AT5G40730 | 1056.79 | 321.43 | 3.2869718 | 2.96E-04    | no  |
| 247546_at | AT5G61605 | 1366.07 | 432.08 | 3.2599456 | 0.001638986 | yes |
| 265205_at | AT2G36660 | 154.44  | 50.00  | 3.2502065 | 0.00182947  | no  |
| 246896_at | AT5G25550 | 63.40   | 19.21  | 3.2454767 | 0.001454356 | yes |
| 245820_at | AT1G26320 | 195.25  | 60.21  | 3.2239423 | 0.002250842 | no  |
| 264798_at | AT1G08730 | 63.73   | 19.88  | 3.2060525 | 4.01E-05    | no  |
| 246551_at | AT5G15070 | 24.14   | 7.52   | 3.199446  | 2.83E-04    | no  |
| 263003_at | AT1G54450 | 94.27   | 29.65  | 3.1871872 | 8.83E-05    | no  |
| 249277_at | AT5G41890 | 37.68   | 12.42  | 3.1683602 | 0.004104161 | yes |
| 266453_at | AT2G43230 | 35.48   | 11.19  | 3.1661491 | 0.004986311 | no  |
| 260997_at | AT1G26610 | 106.84  | 33.74  | 3.162287  | 1.66E-04    | no  |
| 252140_at | AT3G51070 | 61.67   | 19.91  | 3.1581423 | 0.017062964 | no  |
| 248168_at | AT5G54570 | 86.68   | 29.52  | 3.137777  | 0.017452022 | yes |
| 247897_at | AT5G57810 | 154.63  | 48.89  | 3.137519  | 7.95E-04    | no  |
| 253641_at | AT4G29980 | 790.07  | 256.84 | 3.1068714 | 1.55E-04    | no  |
| 250269_at | AT5G12970 | 32.71   | 10.70  | 3.097592  | 8.68E-04    | no  |
| 261673_at | AT1G18280 | 1159.19 | 373.89 | 3.0912645 | 5.61E-04    | no  |
| 259693_at | AT1G63060 | 193.31  | 62.98  | 3.0911534 | 0.001507254 | no  |
| 246963_at | AT5G24820 | 136.35  | 46.05  | 3.0857022 | 0.005012851 | no  |
| 257399_at | AT1G23690 | 81.20   | 25.99  | 3.0775673 | 9.78E-04    | no  |
| 248367_at | AT5G52360 | 259.39  | 84.79  | 3.0763881 | 0.001010569 | no  |
| 255081_at | AT4G09140 | 54.56   | 18.11  | 3.075739  | 0.003755624 | no  |
| 258840_at | AT3G04620 | 375.84  | 123.22 | 3.0725377 | 0.001211365 | no  |
| 245577_at | AT4G14780 | 154.83  | 50.95  | 3.0485573 | 4.99E-04    | yes |
| 245970_at | AT5G20710 | 851.20  | 277.47 | 3.0470812 | 3.81E-04    | yes |
| 261499_at | AT1G28430 | 496.92  | 167.87 | 3.0176651 | 0.003044215 | no  |
| 265170_at | AT1G23730 | 309.41  | 105.45 | 3.0110934 | 0.006069331 | no  |
| 262393_at | AT1G49490 | 27.96   | 9.37   | 3.0098157 | 0.015442135 | no  |
| 258001_at | AT3G28950 | 92.01   | 31.22  | 3.002913  | 6.00E-04    | yes |
| 252733_at | AT3G43120 | 74.49   | 24.94  | 2.9957993 | 0.003818771 | yes |
| 248534_at | AT5G50030 | 262.46  | 88.60  | 2.9941647 | 0.001035591 | yes |
| 249429_at | AT5G39880 | 72.45   | 24.69  | 2.9865193 | 0.00245141  | yes |
| 255101_at | AT4G08670 | 1251.59 | 416.61 | 2.9840956 | 0.001293561 | yes |
| 260621_at | AT1G08065 | 67.81   | 23.13  | 2.9809265 | 0.005316635 | no  |
| 254301_at | AT4G22790 | 84.91   | 28.64  | 2.9764225 | 4.18E-05    | yes |
| 258940_at | AT3G09930 | 14.22   | 4.62   | 2.9671555 | 0.03026893  | no  |
| 251981_at | AT3G53080 | 10.20   | 3.42   | 2.963246  | 0.020234704 | no  |

|           |           |         |         |           |             |     |
|-----------|-----------|---------|---------|-----------|-------------|-----|
| 254520_at | AT4G19960 | 81.32   | 28.34   | 2.955541  | 0.006909187 | no  |
| 257183_at | AT3G13220 | 380.49  | 129.50  | 2.9446557 | 2.87E-05    | no  |
| 262385_at | AT1G72960 | 16.24   | 5.78    | 2.9348474 | 0.007159626 | no  |
| 265163_at | AT1G23580 | 328.07  | 113.69  | 2.9334447 | 0.001762001 | no  |
| 263718_at | AT2G13570 | 247.14  | 86.13   | 2.923781  | 0.004305918 | yes |
| 260059_at | AT1G78090 | 25.40   | 8.71    | 2.9147358 | 0.001603415 | no  |
| 267295_at | AT2G23800 | 1001.88 | 343.08  | 2.9125767 | 5.59E-04    | no  |
| 252061_at | AT3G52620 | 191.76  | 66.37   | 2.9102492 | 0.002177592 | no  |
| 245151_at | AT2G47550 | 28.84   | 9.87    | 2.9084165 | 0.002713474 | no  |
| 259346_at | AT3G03910 | 443.88  | 154.08  | 2.9032545 | 0.001426009 | no  |
| 260773_at | AT1G78440 | 211.31  | 74.99   | 2.8983023 | 0.019844882 | no  |
| 255175_at | AT4G07960 | 50.95   | 17.90   | 2.8946047 | 0.003433484 | yes |
| 266143_at | AT2G38905 | 337.59  | 118.13  | 2.8802803 | 4.96E-04    | no  |
| 259527_at | AT1G12600 | 62.54   | 21.55   | 2.872524  | 0.002062767 | no  |
| 264187_at | AT1G54860 | 301.22  | 107.00  | 2.8505664 | 0.002318854 | no  |
| 260158_at | AT1G79910 | 22.26   | 8.41    | 2.8500447 | 0.008281982 | no  |
| 264482_at | AT1G77210 | 127.36  | 45.60   | 2.8494399 | 0.003249186 | no  |
| 256128_at | AT1G18140 | 154.30  | 57.07   | 2.8453195 | 0.004144106 | no  |
| 255806_at | AT4G10260 | 358.22  | 126.75  | 2.8330023 | 3.16E-04    | no  |
| 246545_at | AT5G15110 | 40.60   | 14.77   | 2.8303041 | 0.002768278 | yes |
| 250476_at | AT5G10140 | 31.98   | 11.74   | 2.8272328 | 0.008290174 | no  |
| 257255_at | AT3G21960 | 26.76   | 9.51    | 2.8261535 | 0.002275632 | no  |
| 265180_at | AT1G23590 | 100.64  | 35.74   | 2.8200562 | 1.85E-04    | no  |
| 259975_at | AT1G76470 | 1016.63 | 363.87  | 2.810662  | 0.00558342  | no  |
| 253934_at | AT4G26830 | 117.41  | 42.21   | 2.8104222 | 2.70E-04    | yes |
| 265672_at | AT2G31980 | 9103.72 | 3281.14 | 2.7986882 | 0.001294095 | no  |
| 255580_at | AT4G01470 | 355.54  | 129.42  | 2.7895436 | 0.002551445 | no  |
| 245830_at | AT1G57790 | 32.68   | 11.67   | 2.7886803 | 8.88E-05    | no  |
| 257349_at | AT2G30630 | 16.37   | 5.93    | 2.7801325 | 0.002683393 | yes |
| 256598_at | AT3G30180 | 349.26  | 125.99  | 2.7708561 | 8.53E-04    | yes |
| 265185_at | AT1G23670 | 396.58  | 142.91  | 2.768346  | 3.63E-04    | no  |
| 252090_at | AT3G52130 | 2625.37 | 962.45  | 2.7441087 | 1.45E-05    | no  |
| 267322_at | AT2G19330 | 19.07   | 6.93    | 2.7417116 | 0.004294978 | no  |
| 266481_at | AT2G31070 | 281.12  | 107.30  | 2.7396438 | 0.004683437 | yes |
| 251743_at | AT3G55890 | 36.36   | 13.58   | 2.7313235 | 0.002761965 | no  |
| 248964_at | AT5G45340 | 94.12   | 34.47   | 2.7233236 | 0.039089344 | yes |
| 260097_at | AT1G73220 | 444.37  | 170.33  | 2.7173486 | 0.007653333 | no  |
| 261305_at | AT1G48470 | 300.38  | 110.86  | 2.713855  | 2.02E-04    | no  |
| 248245_at | AT5G53190 | 895.09  | 333.93  | 2.7044272 | 0.001707063 | yes |
| 249542_at | AT5G38140 | 102.71  | 37.95   | 2.7040215 | 1.37E-04    | yes |
| 263028_at | AT1G24030 | 38.18   | 15.21   | 2.6950645 | 0.022177372 | no  |
| 254933_at | AT4G11130 | 52.51   | 20.52   | 2.6946614 | 0.005648575 | yes |
| 254453_at | AT4G21120 | 73.24   | 27.33   | 2.6807127 | 1.00E-04    | no  |
| 258035_at | AT3G21180 | 27.79   | 10.44   | 2.6672568 | 0.002283316 | no  |
| 266799_at | AT2G22860 | 52.24   | 20.40   | 2.661277  | 0.009238644 | yes |
| 247519_at | AT5G61430 | 137.29  | 52.46   | 2.6557953 | 0.003082249 | yes |
| 261396_at | AT1G79800 | 50.46   | 18.97   | 2.654841  | 8.28E-04    | no  |
| 263360_at | AT2G03830 | 49.84   | 18.49   | 2.654561  | 0.007107353 | no  |
| 251358_at | AT3G61160 | 81.25   | 31.27   | 2.651964  | 0.006749032 | no  |
| 262987_at | AT1G23240 | 2675.61 | 1014.07 | 2.6493645 | 7.35E-04    | no  |
| 250638_at | AT5G07540 | 1818.91 | 690.78  | 2.6434789 | 0.003225475 | no  |
| 262358_at | AT1G73050 | 29.26   | 10.43   | 2.6342878 | 0.015482771 | no  |
| 256578_at | AT3G28200 | 43.12   | 16.26   | 2.6333697 | 0.024021802 | yes |
| 252005_at | AT3G52810 | 687.77  | 265.37  | 2.6308815 | 0.001780303 | no  |
| 264610_at | AT1G04645 | 47.89   | 18.67   | 2.6186287 | 0.009615727 | no  |
| 250636_at | AT5G07520 | 801.25  | 308.23  | 2.617712  | 0.001031331 | no  |
| 246841_at | AT5G26700 | 222.26  | 86.86   | 2.6081374 | 0.002867362 | no  |
| 257491_at | AT1G06170 | 375.88  | 144.96  | 2.6075747 | 3.96E-05    | no  |
| 257841_at | AT3G25260 | 53.64   | 20.31   | 2.6060078 | 9.41E-04    | no  |
| 246344_at | AT3G56730 | 45.05   | 17.48   | 2.597431  | 0.007438321 | no  |

|           |           |         |         |           |             |     |
|-----------|-----------|---------|---------|-----------|-------------|-----|
| 246592_at | AT5G14890 | 20.74   | 7.95    | 2.5918186 | 0.020266501 | no  |
| 257102_at | AT3G25050 | 5563.43 | 2215.68 | 2.5906463 | 0.004485958 | no  |
| 266353_at | AT2G01520 | 1025.28 | 408.35  | 2.58214   | 0.002019035 | no  |
| 254468_at | AT4G20460 | 329.37  | 135.16  | 2.5761354 | 0.014921484 | yes |
| 266708_at | AT2G03200 | 417.12  | 163.91  | 2.5756876 | 0.001224869 | no  |
| 257402_at | AT1G23570 | 1284.69 | 503.79  | 2.5720782 | 0.003179174 | no  |
| 249920_at | AT5G19260 | 138.88  | 57.11   | 2.5602443 | 0.045878716 | no  |
| 265127_at | AT1G55560 | 298.79  | 116.47  | 2.5602136 | 0.001496798 | no  |
| 262949_at | AT1G75790 | 624.75  | 247.15  | 2.5599334 | 0.001262055 | no  |
| 254956_at | AT4G10850 | 386.34  | 153.10  | 2.5581117 | 0.002927222 | yes |
| 257951_at | AT3G21700 | 136.56  | 53.23   | 2.555616  | 0.004526666 | yes |
| 258322_at | AT3G22740 | 106.20  | 43.98   | 2.5552933 | 0.02291038  | no  |
| 264710_at | AT1G09790 | 51.99   | 19.90   | 2.5524142 | 0.018209817 | no  |
| 245499_at | AT4G16480 | 287.71  | 112.28  | 2.5519614 | 2.45E-04    | no  |
| 260914_at | AT1G02640 | 534.82  | 208.78  | 2.5511124 | 1.12E-04    | no  |
| 260032_at | AT1G68750 | 32.03   | 12.80   | 2.5473082 | 0.003957294 | no  |
| 246377_at | AT1G57550 | 58.39   | 23.25   | 2.5434499 | 0.011072521 | no  |
| 252440_at | AT3G47440 | 130.07  | 51.76   | 2.524004  | 0.01465098  | no  |
| 265967_at | AT2G37450 | 323.10  | 128.70  | 2.5183892 | 8.25E-05    | no  |
| 256059_at | AT1G06990 | 441.26  | 175.97  | 2.513862  | 3.21E-04    | no  |
| 247719_at | AT5G59305 | 82.72   | 32.23   | 2.5053816 | 0.012130296 | no  |
| 252769_at | AT3G42850 | 277.39  | 111.99  | 2.4790049 | 6.36E-05    | yes |
| 247561_at | AT5G61110 | 11.76   | 4.74    | 2.4778419 | 2.95E-04    | no  |
| 253590_at | AT4G30850 | 208.61  | 84.96   | 2.465916  | 7.23E-04    | no  |
| 245086_at | AT2G39820 | 53.03   | 22.01   | 2.4642994 | 0.011418066 | no  |
| 260461_at | AT1G10980 | 254.80  | 103.66  | 2.4640708 | 0.001209544 | no  |
| 264039_at | AT2G03740 | 1501.15 | 615.37  | 2.4489725 | 0.001125879 | no  |
| 262917_at | AT1G64800 | 21.56   | 8.81    | 2.4446428 | 0.04042506  | no  |
| 260788_at | AT1G06260 | 1976.14 | 827.65  | 2.4427552 | 0.002843642 | no  |
| 248350_at | AT5G52160 | 340.92  | 139.67  | 2.4394693 | 0.004866162 | yes |
| 263020_at | AT1G23880 | 61.68   | 26.20   | 2.4365895 | 0.007215359 | no  |
| 266115_at | AT2G02140 | 140.82  | 59.61   | 2.4311852 | 0.00247788  | no  |
| 254494_at | AT4G20050 | 2026.05 | 847.76  | 2.4201732 | 0.001314773 | no  |
| 255956_at | AT1G22015 | 380.31  | 160.33  | 2.4129035 | 0.002764732 | no  |
| 262683_at | AT1G75920 | 1601.14 | 672.90  | 2.4119587 | 0.002206837 | no  |
| 246859_at | AT5G25950 | 14.31   | 5.58    | 2.4070065 | 0.030912556 | yes |
| 255345_at | AT4G04460 | 7067.66 | 2931.92 | 2.4066112 | 0.001444061 | yes |
| 259063_at | AT3G07450 | 1769.64 | 736.00  | 2.4042096 | 1.43E-05    | no  |
| 248919_at | AT5G45920 | 45.14   | 18.62   | 2.4011075 | 0.002198515 | yes |
| 265331_at | AT2G18420 | 157.84  | 66.66   | 2.3968756 | 0.001840307 | no  |
| 253850_at | AT4G28090 | 41.53   | 17.52   | 2.3888187 | 0.005305177 | no  |
| 261069_at | AT1G07410 | 102.39  | 43.69   | 2.3867562 | 0.003598909 | no  |
| 254904_at | AT4G11160 | 572.73  | 240.32  | 2.3840218 | 1.34E-06    | yes |
| 246208_at | AT4G36490 | 66.26   | 28.57   | 2.3738394 | 0.002151529 | no  |
| 251250_at | AT3G62180 | 122.67  | 52.21   | 2.3721924 | 0.007243713 | no  |
| 245228_at | AT3G29810 | 15.17   | 6.27    | 2.3712816 | 0.04880642  | yes |
| 266118_at | AT2G02130 | 4469.03 | 1893.70 | 2.3679209 | 1.46E-04    | no  |
| 248040_at | AT5G55970 | 196.08  | 82.96   | 2.3659494 | 4.38E-04    | no  |
| 263011_at | AT1G23250 | 130.07  | 57.37   | 2.3646946 | 0.02090834  | no  |
| 257107_at | AT3G29070 | 19.95   | 8.46    | 2.3556914 | 0.005916068 | yes |
| 257904_at | AT3G28470 | 13.26   | 5.70    | 2.3552413 | 0.013052155 | no  |
| 266530_at | AT2G16910 | 850.90  | 362.67  | 2.3523662 | 2.90E-04    | no  |
| 261264_at | AT1G26710 | 358.18  | 158.88  | 2.3510058 | 0.005153147 | no  |
| 266494_at | AT2G07040 | 46.64   | 20.24   | 2.3419018 | 0.006343479 | no  |
| 266866_at | AT2G29940 | 88.03   | 38.82   | 2.326367  | 0.001530079 | no  |
| 249527_at | AT5G38710 | 70.70   | 30.41   | 2.3244395 | 0.028316176 | yes |
| 266462_at | AT2G47770 | 65.05   | 28.12   | 2.320686  | 0.005099452 | no  |
| 264117_at | AT2G31210 | 36.29   | 15.53   | 2.319421  | 0.017627252 | no  |
| 257275_at | AT3G14450 | 101.87  | 44.42   | 2.3114698 | 4.50E-04    | no  |
| 256416_at | AT3G11050 | 78.88   | 33.73   | 2.30996   | 0.013630518 | no  |

|           |           |         |         |           |             |     |
|-----------|-----------|---------|---------|-----------|-------------|-----|
| 249046_at | AT5G44400 | 613.87  | 266.01  | 2.3098233 | 2.37E-04    | yes |
| 250509_at | AT5G09970 | 55.21   | 24.05   | 2.3087308 | 0.021906197 | yes |
| 262674_at | AT1G75910 | 5444.71 | 2404.32 | 2.307473  | 0.00313648  | no  |
| 262675_at | AT1G75930 | 7556.33 | 3312.00 | 2.3034918 | 0.001909436 | no  |
| 261302_at | AT1G48580 | 75.28   | 33.22   | 2.2959292 | 0.004611112 | no  |
| 267150_at | AT2G23510 | 166.96  | 74.20   | 2.295831  | 0.001617308 | no  |
| 247657_at | AT5G59845 | 2113.44 | 943.14  | 2.2887785 | 0.004644582 | yes |
| 250635_at | AT5G07510 | 1505.58 | 674.00  | 2.288495  | 0.002925841 | yes |
| 248499_at | AT5G50400 | 559.07  | 246.76  | 2.285179  | 7.90E-04    | yes |
| 249687_at | AT5G36150 | 40.17   | 17.39   | 2.2847648 | 3.43E-04    | yes |
| 263599_at | AT2G01830 | 165.28  | 71.63   | 2.2802174 | 0.007600582 | no  |
| 245674_at | AT1G56680 | 24.17   | 10.60   | 2.2755013 | 0.006705329 | no  |
| 259744_at | AT1G71160 | 1228.04 | 541.46  | 2.272846  | 4.75E-04    | no  |
| 265164_at | AT1G23600 | 168.00  | 76.45   | 2.2687294 | 0.017416866 | no  |
| 245982_at | AT5G13170 | 145.75  | 63.34   | 2.2646103 | 0.006028885 | no  |
| 259377_at | AT3G16380 | 60.77   | 26.74   | 2.2637517 | 1.86E-05    | no  |
| 249540_at | AT5G38120 | 292.22  | 132.11  | 2.2632883 | 0.011114489 | yes |
| 264835_at | AT1G03550 | 50.78   | 22.33   | 2.262646  | 0.001649815 | no  |
| 251595_at | AT3G57620 | 273.52  | 130.53  | 2.2611506 | 0.029868439 | no  |
| 261670_at | AT1G18520 | 135.90  | 60.69   | 2.2600834 | 0.012488171 | no  |
| 257348_at | AT2G42140 | 17.51   | 7.69    | 2.2589464 | 0.011257623 | no  |
| 264577_at | AT1G05260 | 41.35   | 17.82   | 2.2550485 | 0.010892336 | no  |
| 260355_at | AT1G69180 | 398.78  | 177.19  | 2.2547572 | 5.77E-05    | no  |
| 265263_at | AT2G42940 | 527.59  | 230.33  | 2.2464535 | 0.017501118 | no  |
| 257405_at | AT1G24620 | 62.48   | 28.16   | 2.2387059 | 0.003920351 | no  |
| 261392_at | AT1G79780 | 173.10  | 77.41   | 2.2370272 | 7.62E-05    | no  |
| 251277_at | AT3G61760 | 69.01   | 31.09   | 2.2288997 | 0.001229496 | no  |
| 247567_at | AT5G61190 | 179.82  | 80.56   | 2.2263343 | 9.98E-05    | no  |
| 260627_at | AT1G62310 | 46.75   | 21.26   | 2.2231903 | 4.09E-04    | no  |
| 254809_at | AT4G12410 | 122.63  | 58.44   | 2.2153375 | 0.013289147 | yes |
| 254487_at | AT4G20780 | 33.33   | 15.05   | 2.2088547 | 0.028817577 | no  |
| 254683_at | AT4G13800 | 50.30   | 22.94   | 2.202764  | 0.012466529 | no  |
| 262213_at | AT1G74870 | 108.68  | 49.74   | 2.202728  | 0.001805092 | no  |
| 249767_at | AT5G24090 | 34.37   | 15.21   | 2.1984086 | 0.015481235 | no  |
| 251441_at | AT3G60020 | 18.00   | 8.42    | 2.1932404 | 0.022780076 | no  |
| 246533_at | AT5G15880 | 287.36  | 131.75  | 2.187005  | 4.03E-05    | no  |
| 245322_at | AT4G14815 | 1852.13 | 847.28  | 2.181359  | 0.002817046 | no  |
| 262925_at | AT1G65730 | 165.55  | 76.11   | 2.180504  | 0.007037075 | no  |
| 249381_at | AT5G40040 | 594.95  | 275.12  | 2.1723444 | 5.56E-04    | yes |
| 249732_at | AT5G24420 | 2322.90 | 1064.69 | 2.1723216 | 0.001860342 | no  |
| 245699_at | AT5G04250 | 397.78  | 185.78  | 2.1709194 | 0.001806819 | no  |
| 248872_at | AT5G46795 | 98.76   | 46.04   | 2.1691184 | 0.010330169 | yes |
| 260233_at | AT1G74550 | 624.67  | 289.74  | 2.164311  | 9.62E-04    | no  |
| 263363_at | AT2G03850 | 3308.34 | 1548.93 | 2.1580024 | 0.002243994 | no  |
| 260791_at | AT1G06250 | 157.19  | 73.82   | 2.1565793 | 0.001196704 | no  |
| 250479_at | AT5G10260 | 67.62   | 30.99   | 2.1554556 | 0.025270592 | no  |
| 250997_at | AT5G02570 | 77.24   | 35.97   | 2.1541576 | 0.003565648 | no  |
| 267255_at | AT2G22950 | 40.49   | 19.09   | 2.1506844 | 0.001766285 | no  |
| 252571_at | AT3G45280 | 60.26   | 28.38   | 2.145433  | 0.007139439 | yes |
| 254946_at | AT4G10950 | 9.82    | 4.54    | 2.1391761 | 6.49E-04    | no  |
| 245883_at | AT5G09500 | 563.43  | 278.58  | 2.1343565 | 0.011803113 | yes |
| 256481_at | AT1G33430 | 3657.56 | 1729.44 | 2.1322849 | 0.001353877 | no  |
| 248581_at | AT5G49900 | 311.31  | 148.69  | 2.131304  | 0.005098539 | yes |
| 261051_at | AT1G01280 | 829.25  | 393.71  | 2.1289382 | 0.002925493 | no  |
| 265387_at | AT2G20670 | 100.01  | 46.34   | 2.1284664 | 0.0270081   | no  |
| 250619_at | AT5G07230 | 3304.96 | 1567.07 | 2.1213615 | 5.65E-04    | no  |
| 261222_at | AT1G20120 | 1754.54 | 838.37  | 2.1190326 | 0.009754958 | no  |
| 253963_at | AT4G26470 | 13.47   | 6.44    | 2.1119611 | 0.03803137  | yes |
| 255703_at | AT4G00040 | 788.07  | 374.86  | 2.1096938 | 5.94E-04    | yes |
| 262637_at | AT1G06640 | 663.79  | 314.95  | 2.1078408 | 0.005557725 | no  |

|           |           |          |          |           |             |     |
|-----------|-----------|----------|----------|-----------|-------------|-----|
| 258385_at | AT3G15510 | 120.47   | 58.62    | 2.1013768 | 0.00144159  | no  |
| 266015_at | AT2G24190 | 73.93    | 35.67    | 2.1013253 | 0.002434236 | no  |
| 246386_at | AT1G77410 | 53.49    | 25.84    | 2.1010628 | 0.001612896 | no  |
| 250872_at | AT5G03960 | 117.72   | 55.66    | 2.1005015 | 0.010665043 | yes |
| 253012_at | AT4G37900 | 1553.43  | 739.57   | 2.0964906 | 2.48E-04    | yes |
| 253863_at | AT4G27420 | 102.60   | 49.72    | 2.0941036 | 0.002111907 | yes |
| 262765_at | AT1G13150 | 414.68   | 202.13   | 2.0866454 | 0.002374353 | no  |
| 247582_at | AT5G60760 | 117.71   | 56.67    | 2.084815  | 0.030722763 | no  |
| 247759_at | AT5G59040 | 89.84    | 43.70    | 2.0776815 | 4.66E-04    | no  |
| 248638_at | AT5G49070 | 121.22   | 58.16    | 2.077253  | 0.041356646 | no  |
| 256419_at | AT1G33470 | 105.90   | 51.35    | 2.074363  | 6.12E-04    | no  |
| 263368_at | AT2G20470 | 73.42    | 35.47    | 2.074313  | 9.57E-04    | no  |
| 260022_at | AT1G30020 | 645.75   | 311.76   | 2.071682  | 0.002724563 | no  |
| 248371_at | AT5G51810 | 24.11    | 12.02    | 2.0704272 | 0.006678246 | no  |
| 266078_at | AT2G40670 | 559.63   | 272.66   | 2.0658307 | 0.012825166 | no  |
| 250860_at | AT5G04770 | 114.64   | 55.74    | 2.060856  | 0.002987884 | no  |
| 250639_at | AT5G07560 | 4752.25  | 2322.05  | 2.0596669 | 0.001550682 | no  |
| 249865_at | AT5G22820 | 81.82    | 40.14    | 2.0571916 | 0.012160042 | no  |
| 251361_at | AT3G61230 | 36.53    | 20.11    | 2.0571735 | 0.040686645 | no  |
| 247462_at | AT5G62080 | 8094.70  | 3939.76  | 2.056002  | 7.79E-06    | no  |
| 250637_at | AT5G07530 | 24174.00 | 11837.39 | 2.055867  | 5.63E-04    | no  |
| 248296_at | AT5G53090 | 136.21   | 67.26    | 2.053872  | 0.005764713 | no  |
| 254175_at | AT4G24050 | 90.53    | 44.91    | 2.053023  | 0.001748134 | no  |
| 251356_at | AT3G61060 | 125.78   | 62.14    | 2.0484092 | 7.70E-04    | no  |
| 256297_at | AT1G69500 | 2903.12  | 1435.01  | 2.0445437 | 8.75E-04    | no  |
| 265186_at | AT1G23560 | 448.05   | 219.41   | 2.0398157 | 0.001424264 | no  |
| 250471_at | AT5G10170 | 165.11   | 80.67    | 2.0377858 | 0.004595071 | no  |
| 261559_at | AT1G01780 | 161.56   | 79.17    | 2.0363097 | 0.015372991 | no  |
| 267127_at | AT2G23610 | 123.34   | 61.25    | 2.0360088 | 0.01632749  | no  |
| 251825_at | AT3G55100 | 12.56    | 6.12     | 2.033751  | 0.029315587 | yes |
| 263453_at | AT2G22180 | 24.01    | 11.76    | 2.032304  | 0.017392747 | no  |
| 263406_at | AT2G04160 | 44.58    | 22.28    | 2.0315905 | 0.033211783 | no  |
| 263905_at | AT2G36190 | 263.29   | 128.90   | 2.031369  | 0.007802574 | no  |
| 250648_at | AT5G06760 | 8.75     | 4.31     | 2.0283942 | 4.76E-04    | no  |
| 257476_at | AT1G80960 | 55.13    | 27.82    | 2.02422   | 0.010876722 | no  |
| 247956_at | AT5G56970 | 250.38   | 124.61   | 2.0219152 | 0.030805903 | no  |
| 261171_at | AT1G04880 | 207.79   | 103.85   | 2.018744  | 0.002204213 | no  |
| 250907_at | AT5G03670 | 244.61   | 122.54   | 2.0135083 | 4.89E-04    | no  |
| 263513_at | AT2G12400 | 439.99   | 218.94   | 2.013043  | 1.81E-04    | no  |
| 266666_at | AT2G29780 | 10.93    | 5.16     | 2.009186  | 0.032963917 | no  |
| 261109_at | AT1G75450 | 87.60    | 41.72    | 2.006382  | 0.04030508  | no  |
| 262115_at | AT1G02813 | 2084.22  | 1070.93  | 2.0050085 | 0.019345041 | no  |
| 259461_at | AT1G18900 | 137.26   | 69.45    | 2.0035214 | 0.006289406 | no  |
| 246075_at | AT5G20410 | 103.22   | 51.89    | 2.0034378 | 0.001624272 | no  |
| 250576_at | AT5G08250 | 63.56    | 31.70    | 2.0021982 | 0.003285957 | no  |
| 264225_at | AT1G67420 | 46.12    | 23.54    | 2.0020037 | 0.020862415 | no  |
| 262942_at | AT1G79450 | 28.60    | 14.42    | 2.0000415 | 0.020962957 | no  |

**Supplemental Table 4**

Genes both predicted to be cleaved by TE siRNAs and decreased 2-fold in *ddm1* F6 p<0.05, with no TE in gene space

| siRNA sequence         | siRNA RPM in <i>ddm1</i> F6 AGO1-IP | small RNA length | predicted target gene | E-value | Gene expression fold-change in <i>ddm1</i> F6 | gene annotation                                                                 |
|------------------------|-------------------------------------|------------------|-----------------------|---------|-----------------------------------------------|---------------------------------------------------------------------------------|
| UUCCAGAACUAAUGAAUGUUA  | 448                                 | 21               | AT4G35670             | 4       | 5.85                                          | Pectin lyase-like superfamily protein                                           |
| UCGGCUCAAACCUAACACGCUU | 129                                 | 21               | AT3G13610             | 5       | 4.68                                          | 2-oxoglutarate (2OG) and Fe(II)-dependent oxygenase superfamily protein         |
| UUCUGAAGGACAAGAUACAGCU | 351                                 | 21               | AT3G20865             | 4       | 4.18                                          | AGP40, arabinogalactan protein 40                                               |
| UUCAGGGUGAGAACAUUGACU  | 1291                                | 21               | AT4G22960             | 4       | 4.15                                          | Protein of unknown function (DUF544)                                            |
| CUUCCCCUAGAAUUCUUUCCC  | 401                                 | 21               | AT5G09550             | 3.5     | 4.14                                          | GDP dissociation inhibitor family protein / Rab GTPase activator family protein |
| UUUGGGUUUGGGUUAACUGCU  | 225                                 | 21               | AT5G03250             | 3       | 3.55                                          | Phototropic-responsive NPH3 family protein                                      |
| CAAGAACCCGCACGACACUCG  | 169                                 | 21               | AT3G51490             | 5       | 3.30                                          | TMT3, tonoplast monosaccharide transporter3                                     |
| UACUCGACCACACUGUAGGA   | 183                                 | 21               | AT3G51070             | 4.5     | 3.16                                          | S-adenosyl-L-methionine-dependent methyltransferases superfamily protein        |
| AUACCCAAACCUGAACUUCU   | 127                                 | 21               | AT1G08065             | 4       | 2.98                                          | ATACAS, ACAS, alpha carbonic anhydrase 5                                        |
| UACUCCAGAAACUCACAACGA  | 113                                 | 21               | AT1G79910             | 3.5     | 2.85                                          | Regulator of Vps4 activity in the MVB pathway protein                           |
| UGCACUCGCUAGGUCUGGCAG  | 378                                 | 21               | AT1G57790             | 4.5     | 2.79                                          | F-box family protein                                                            |
| CCUGAGCCUAGUGACCGAGUA  | 270                                 | 21               | AT4G21120             | 4       | 2.68                                          | AAT1, CAT1, amino acid transporter 1                                            |
| UUUAGAGAUCCCCUGUACUG   | 387                                 | 21               | AT5G19260             | 5       | 2.56                                          | FAF3, Fantastic four protein #3, regulates shoot apical meristem size           |
| UCACCUCGCAUCUUGAACUG   | 146                                 | 21               | AT1G68750             | 3       | 2.55                                          | ATPPC4, PPC4, phosphoenolpyruvate carboxylase 4                                 |
| UGUCACCGUAGAUUUUCUCCU  | 123                                 | 21               | AT4G30850             | 3       | 2.47                                          | HHP2, heptahelical transmembrane protein2                                       |
| AAUUCGAGAACUCCUGACCC   | 255                                 | 21               | AT1G64800             | 4       | 2.44                                          | DNA binding;sequence-specific DNA binding transcription factors                 |
| UCACUUUGCUGAACAUUGUACC | 138                                 | 21               | AT5G55970             | 4       | 2.37                                          | RING/U-box superfamily protein                                                  |
| UUUGAUCCGAGGAUGAUGGAU  | 816                                 | 21               | AT2G16910             | 2       | 2.35                                          | AMS, basic helix-loop-helix (bHLH) DNA-binding superfamily protein              |
| UGAGCCGACAAGAGUAGUAC   | 111                                 | 21               | AT2G29940             | 4.5     | 2.33                                          | PDR3, ATPDR3, pleiotropic drug resistance 3                                     |
| UUGACUUCAGACCUGCGCGUG  | 131                                 | 21               | AT2G47770             | 4       | 2.32                                          | ATTSPO, TSPO, outer membrane tryptophan-rich sensory protein-related            |
| UGUCCCAACUUAACUCUACCCU | 279                                 | 22               | AT1G18520             | 3.5     | 2.26                                          | TET11, tetraspanin11                                                            |
| UACGCGACCGCGUGCUGGCC   | 119                                 | 21               | AT2G20670             | 4.5     | 2.13                                          | Protein of unknown function (DUF506)                                            |
| UGGAUUCGCGCUGCAUACUCC  | 392                                 | 21               | AT5G49070             | 5       | 2.08                                          | KCS21, 3-ketoacyl-CoA synthase 21                                               |
| UGUGGAUACAAGAGCUGGGCU  | 215                                 | 21               | AT5G07560             | 4       | 2.06                                          | GRP20, ATGRP20, glycine-rich protein 20                                         |
| UCUGAUUGCAUGUGGUGUACC  | 109                                 | 21               | AT5G22820             | 4       | 2.06                                          | ARM repeat superfamily protein                                                  |
| UAUGAGUUGAUCGACGAAGAU  | 123                                 | 21               | AT3G61060             | 4.5     | 2.05                                          | AtPP2-A13, PP2-A13, phloem protein 2-A13, carbohydrate binding                  |
| GCAAGUGAUGAUAAAAGACA   | 100                                 | 21               | AT2G36190             | 3       | 2.03                                          | AtcwiINV4, cwINV4, cell wall invertase 4                                        |
| average                | 278.828                             |                  | total=27              | 3.963   | 2.901                                         |                                                                                 |

**Supplemental Table 5**

Mutant alleles and primer sequences used in this report

| Mutant Allele              | Original background |  |  |  |  |
|----------------------------|---------------------|--|--|--|--|
| <i>ddm1-2</i>              | Col                 |  |  |  |  |
| <i>rdr6-15</i>             | Col                 |  |  |  |  |
| <i>ubp1b (FLAG_298B04)</i> | Ws                  |  |  |  |  |

  

| Target                      | Experiment              | Figure                | Forward primer sequence | Reverse primer sequence 1   | Reverse primer sequence 2 |
|-----------------------------|-------------------------|-----------------------|-------------------------|-----------------------------|---------------------------|
| <i>Athila6</i>              | probe for Northern blot | Figure 1              | TCACTTGCGTCGTTGTGAGTTT  | TCAGAAACGTGATGGCTTTGAA      |                           |
| <i>MiR166a</i>              | probe for Northern blot | Figure 1              | GGGGAATGAAGCCTGGTCCGA   |                             |                           |
| <i>MiR161</i>               | probe for Northern blot | Figure 1              | TAGTCACTTTCAATGCATTGA   |                             |                           |
| <i>At2g16910 (AMS)</i>      | qRT-PCR                 | Figure 4              | AGCGGAGAATGGAACAGAAGAG  | CCGGAATCAAGAGGTATGGAAG      |                           |
| <i>AT4G30850 (HHP2)</i>     | qRT-PCR                 | Figure 4              | GATTTCGCCGAGTTCAATTTT   | CTTCACCGTTCTCCGTTTCTG       |                           |
| <i>AT1G57790</i>            | qRT-PCR                 | Figure 4              | AGCCTTGCCCTTTTCTTCACTTG | GGCCTGGATCATAATCCTTGATAG    |                           |
| <i>AT4G07960 (AtCLSC12)</i> | qRT-PCR                 | Figure 4              | CCCGCGGTCATTAAATCAAAG   | TCGGGTACAAACATAGTCATTGG     |                           |
| <i>AT5G27600 (ATLACS7)</i>  | qRT-PCR                 | Figure 4              | CAAGTGCCGTAAAATCATCTGG  | TCAGGTGACAAAGGAGAAGCAC      |                           |
| <i>AT4G17610</i>            | qRT-PCR                 | Figure 4              | CGACAGAGTTTGATCCTTGTGG  | CTTGCATCTGCAACAGCAAGAC      |                           |
| <i>AT4G30850 (HHP2)</i>     | modified 5' RACE        | Figure 4              |                         | ATCTCTTCTTTTCGCCGAATC       | GTTCTCCGTTTCTGCATGATTC    |
| <i>DCP2</i>                 | RFP fusion              | Figure 5              | CACCATGTGCGGCCCTCCATCG  | AGCTGAATTACCAGATTCCAACGCCTG |                           |
| <i>G3PB</i>                 | RFP fusion              | Figure 5              | CACCATGGCACAGCAGGAAGC   | AGATGAACCACCACCTCGAGCTC     |                           |
| <i>MiR156</i>               | probe for Northern blot | Supplemental Figure 1 | GTGCTCACTCTCTTCTGTCA    |                             |                           |
| <i>MiR166</i>               | probe for Northern blot | Supplemental Figure 1 | GGGGAATGAAGCCTGGTCCGA   |                             |                           |
| <i>AGO1</i>                 | qRT-PCR                 | Supplemental Figure 2 | GGAGGTGGACCTTCTTCTGGAC  | CCTCAGACAGTG TAGGCTGAGAAG   |                           |
| <i>AGO1</i>                 | modified 5' RACE        | Supplemental Figure 2 |                         | TTGTTTCATCACAGCAGATTG       | CAGGCAGTTCAGCAAAGAAATG    |
| <i>ATHB-15</i>              | qRT-PCR                 | Supplemental Figure 3 | ACAAAGGAAAGAGGCTTCACG   | TCTGCAACCTGTCAATTCTCCTC     |                           |
| <i>ATHB-15</i>              | modified 5' RACE        | Supplemental Figure 3 |                         | GAGATCTCTCGCACACCACAAG      | GGCCAATGTAGTTGGTGCATAG    |
| <i>MYB33</i>                | qRT-PCR                 | Supplemental Figure 3 | GCCCATCTATTACCCATCTTGG  | GCCCATCTATTACCCATCTTGG      |                           |
| <i>MYB33</i>                | modified 5' RACE        | Supplemental Figure 3 |                         | CAGTAACCTGGCCAAGATCAGC      | CCAGAAGCAACATATCGAGCAG    |
| <i>DCL1</i>                 | qRT-PCR                 | Supplemental Figure 3 | TATCTCACGCAGCGTTCCTAAG  | AGCTAACCATGGCACCAGTTG       |                           |
| <i>DCL1</i>                 | modified 5' RACE        | Supplemental Figure 3 |                         | TCCAGTTGATCCCTTTTATGG       | ACAAACAGGTAGGCCTTTGCAG    |
